# Supplementary material for: SntB triggers the antioxidant pathways to regulate development and aflatoxin biosynthesis in Aspergillus flavus
Source: eLife journal article supplement (doi:10.7554/elife.94743), 2024-03-04
Supplement: figures [file elife-94743-figures-v1.pdf]

---

## Figures and figure supplements

SntB triggers the antioxidant pathways to regulate development and aflatoxin biosynthesis in *Aspergillus flavus*

**Dandan Wu and Chi Yang et al.**

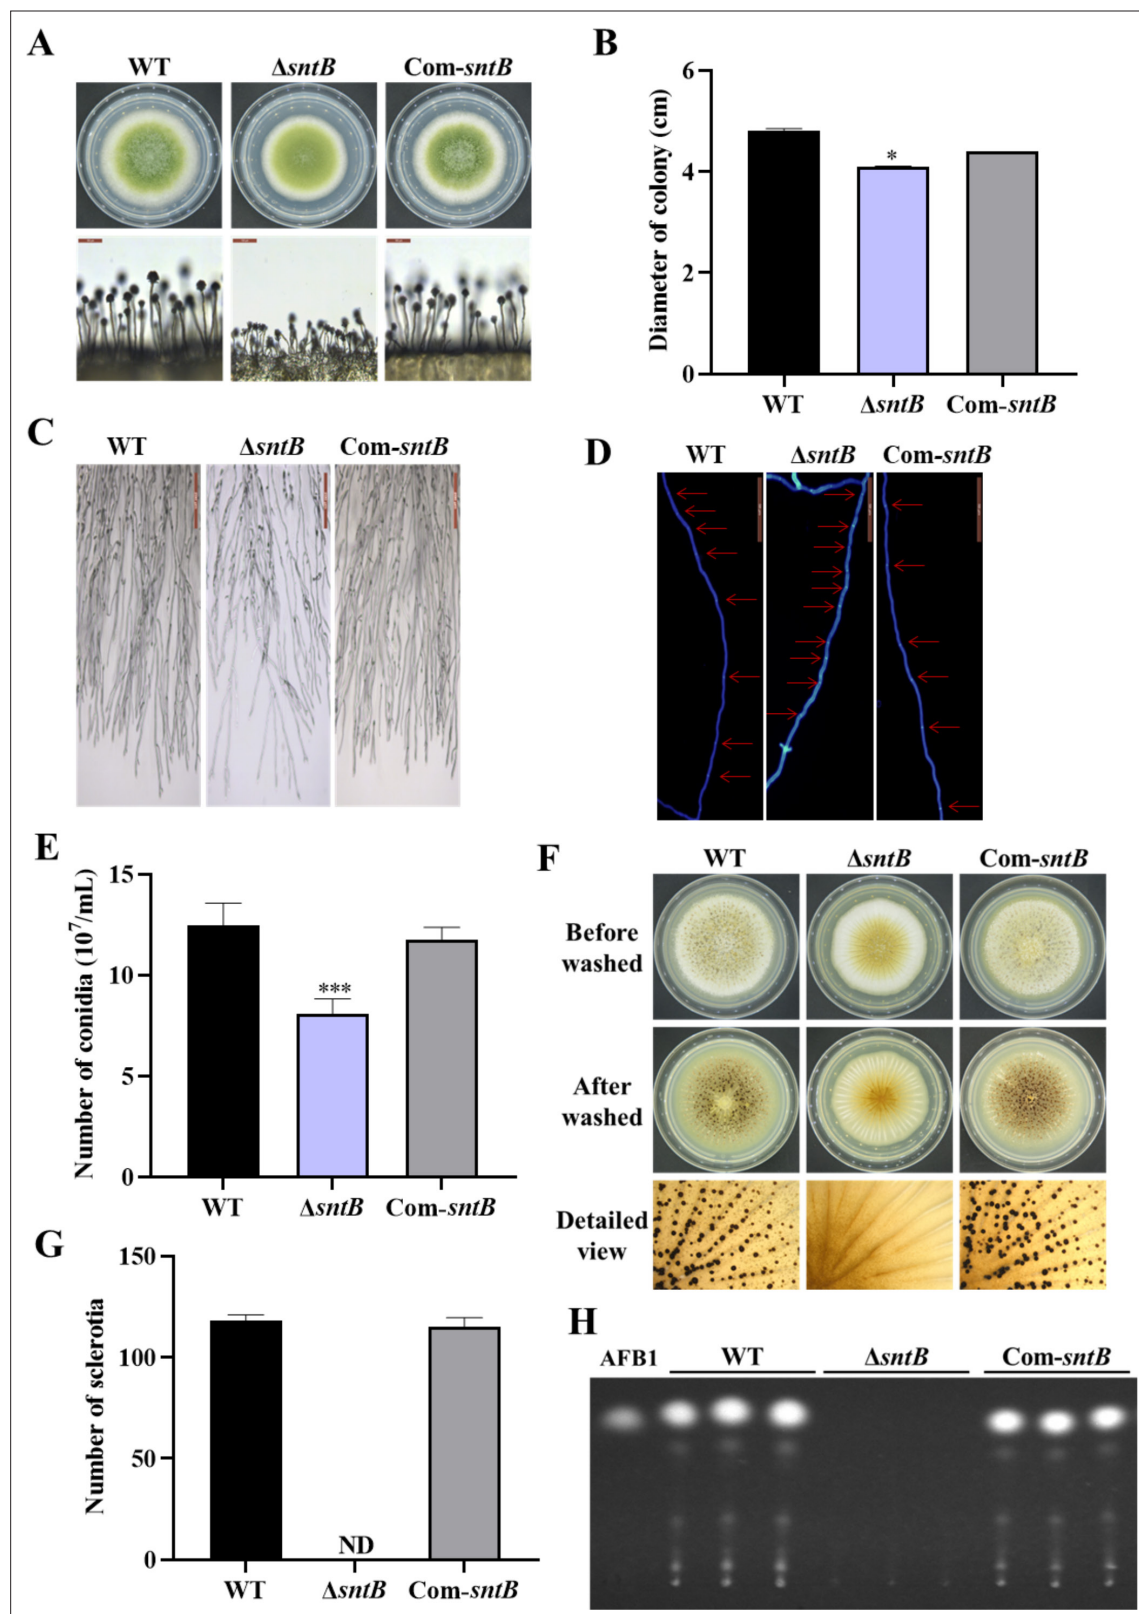

**Figure 1.** The functions of SntB in *A. flavus*. **(A)** The colonies of wild-type (WT),  $\Delta sntB$ , and Com-*sntB* strains grown on potato dextrose agar (PDA) at 37°C in dark for 4 days. **(B)** The colony diameter statistics of the above fungal strains. **(C)** Microscopic examination revealed the difference in mycelia of each fungi strain at 37°C in dark, scale=200  $\mu$ m. **(D)** Microscopic examination of the hyphal septum of each strain at 37°C in dark, scale=50  $\mu$ m. **(E)** The spore production statistics. **(F)** All the above fungal strains were point-inoculated on CM medium and grown for 7 days at 37°C. **(G)** The number of sclerotia. **(H)** AFB1 production. Figure 1 continued on next page

*Figure 1 continued*

of sclerotia of the above fungal strains. ND=Not detectable. **(H)** AFB1 production of the above fungal strains was detected by TLC after the strains incubating at 29°C in PDB medium for 7 days.

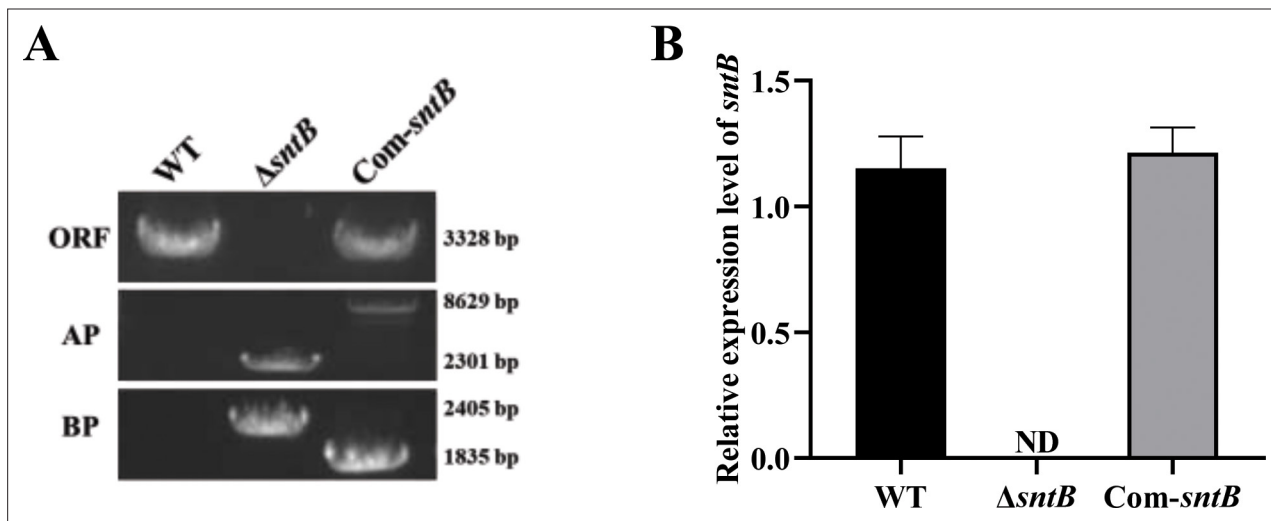

**Figure 1—figure supplement 1.** The construction of mutant strains. **(A)** PCR verification of gDNA in wild-type (WT),  $\Delta sntB$ , and Com-*sntB* strains ('ORF' represents the *sntB* gene fragment, 'AP' represents the amplification of the fusion fragment upstream with primers *sntB*-p1 and P801, and 'BP' represents the downstream of the fusion fragment from primers P1020 and *sntB*-p4). **(B)** Quantitative RT-PCR (qRT-PCR) verification of the expression level of the *sntB* gene in WT and *sntB* gene mutant strains.



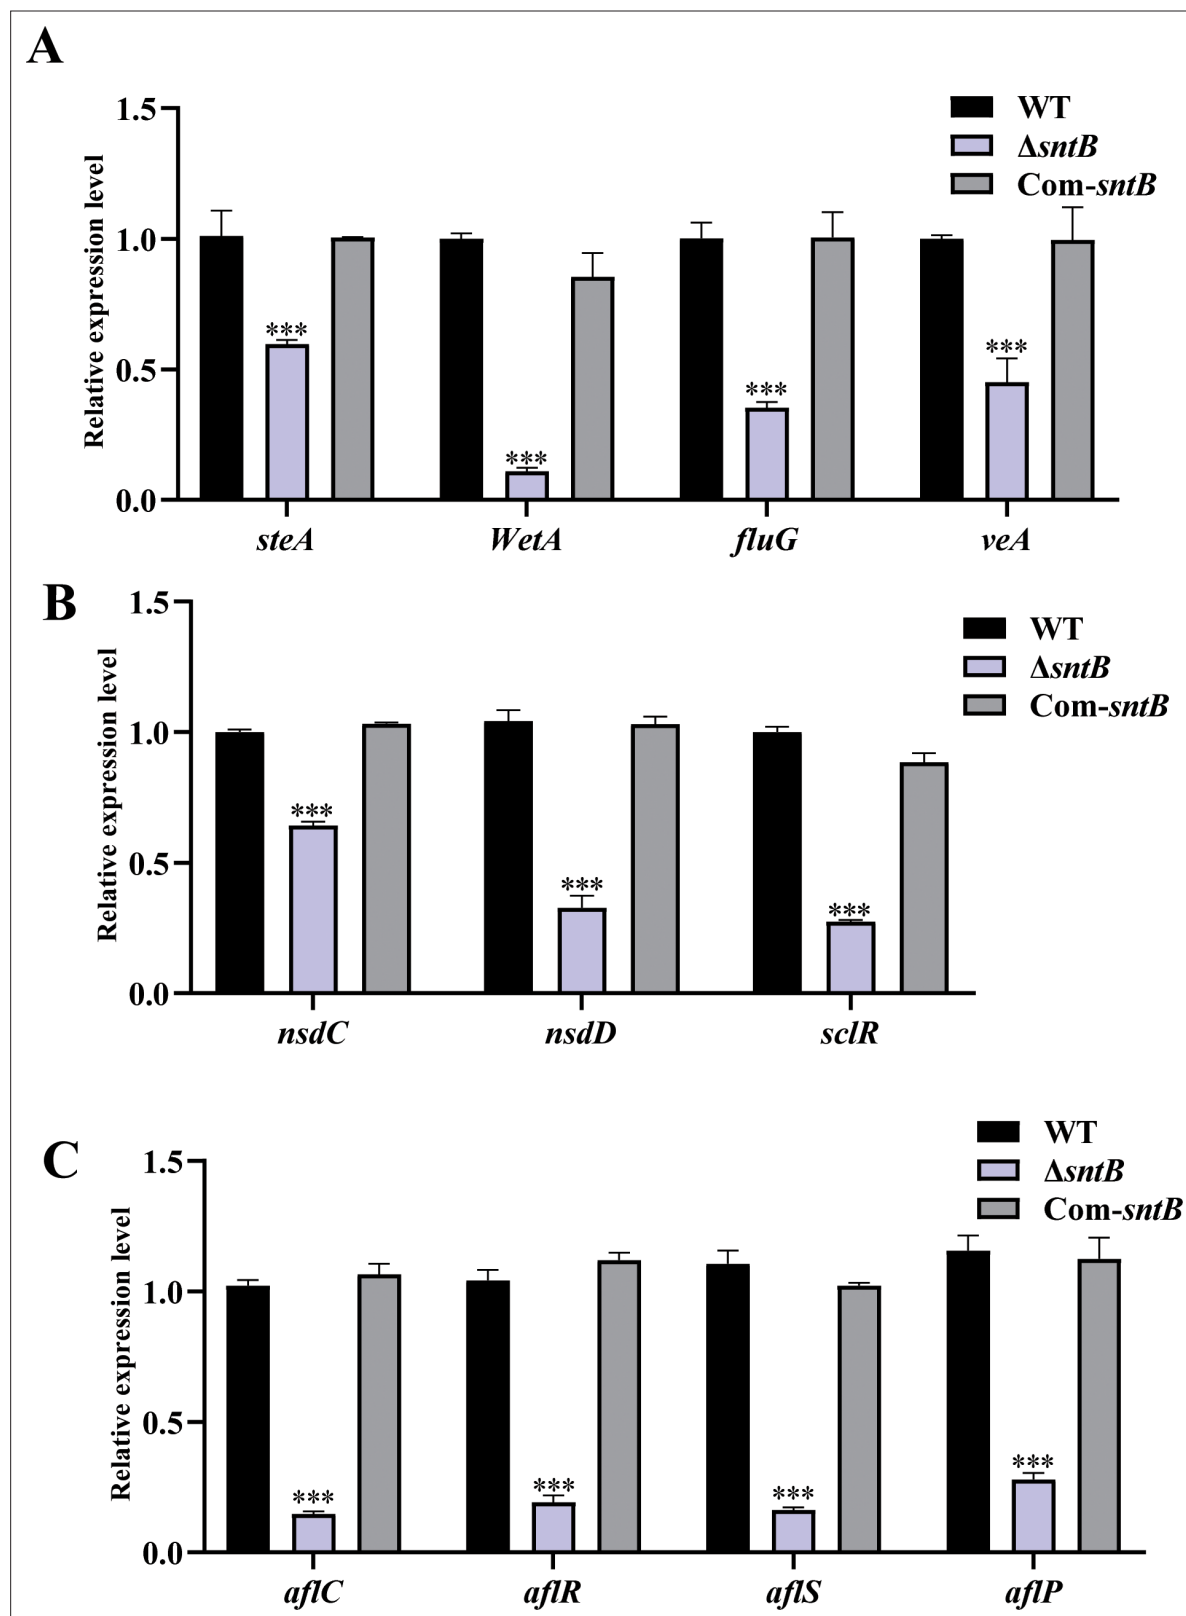

**Figure 1—figure supplement 2.** The expression of genes related to sporulation, sclerotia production, and aflatoxin synthesis. (A) The expression of sporulation-related genes *steA*, *WetA*, *fluG*, and *veA* in each strain at 48 hr. (B) The expression of sclerotia-associated genes *nsdC*, *nsdD*, and *sclR* in each strain at 48 hr. (C) The expression of aflatoxin-associated genes in each strain at 48 hr. The asterisk \*\*\* above the bars represents significantly different ( $p < 0.001$ ).

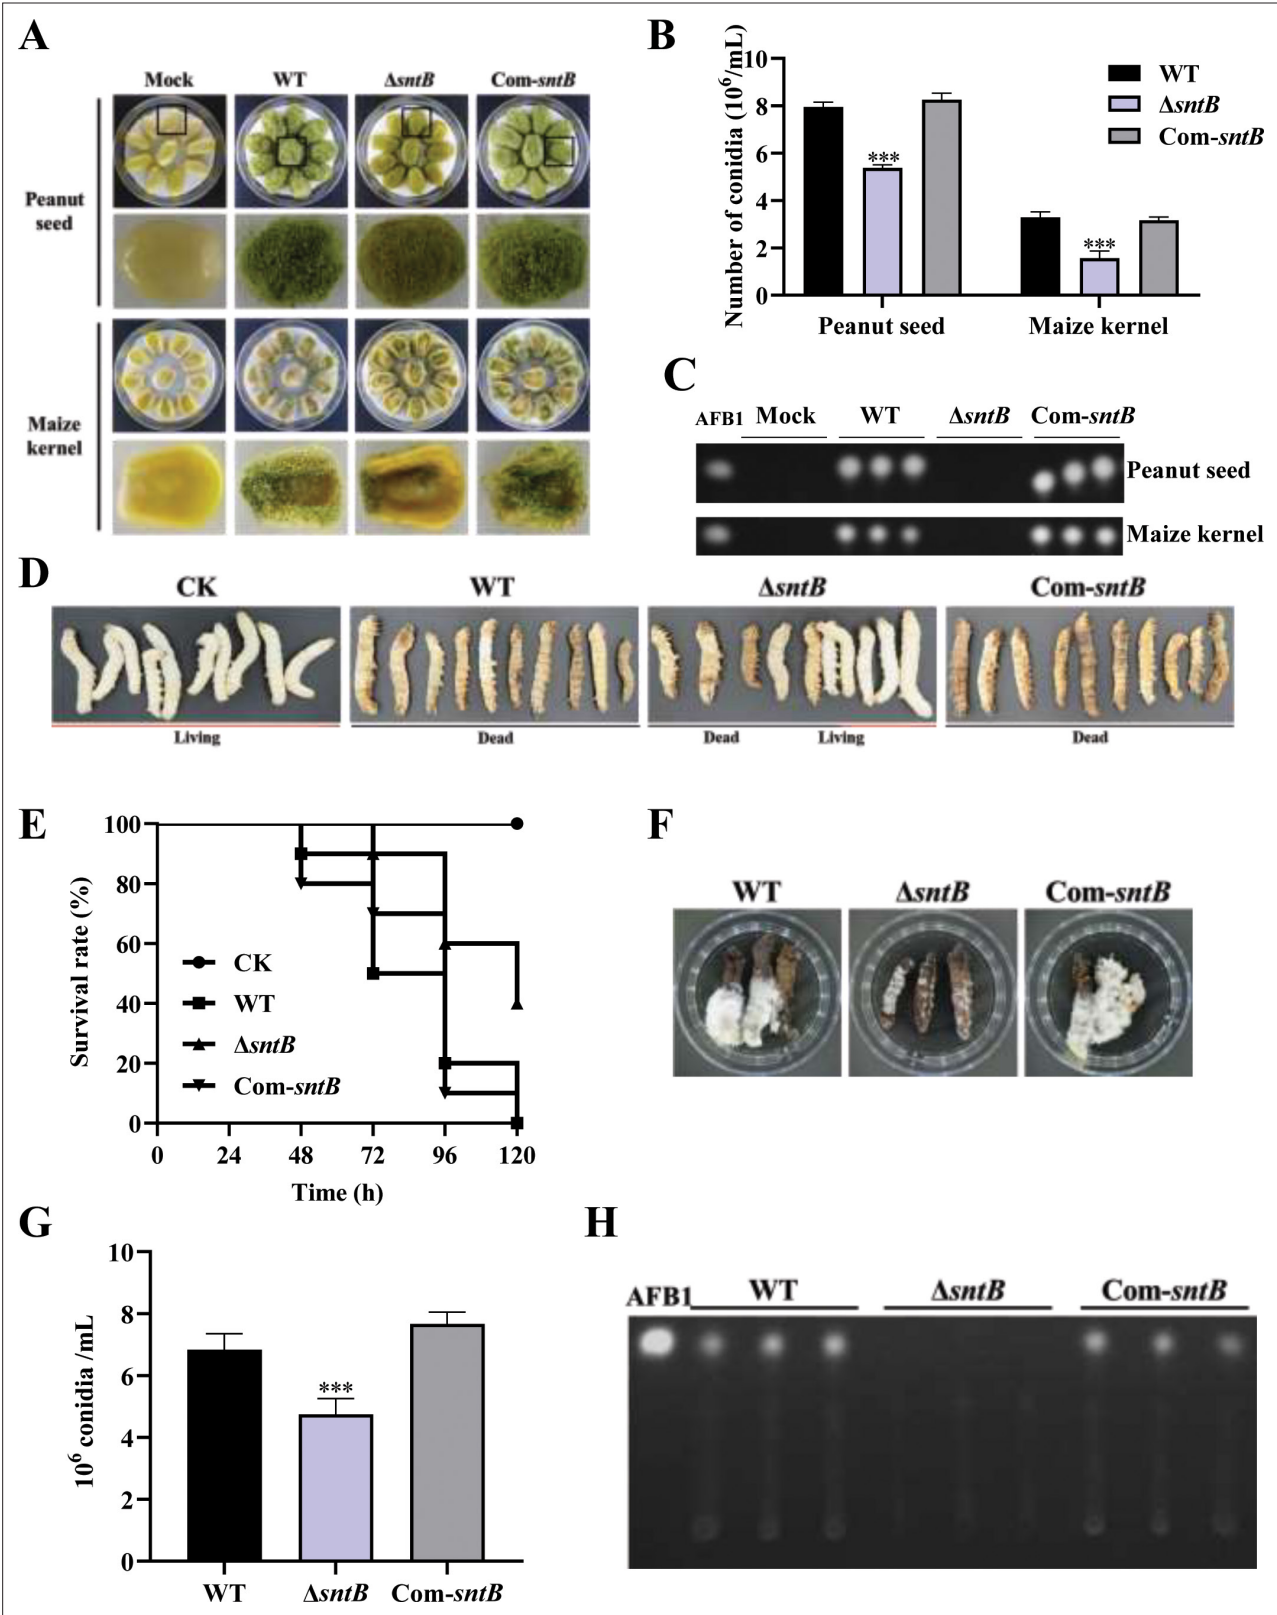

**Figure 2.** The role of SntB on the ability of *A. flavus* to colonize host. (A) Phenotype of peanut and maize kernels colonized by  $\Delta sntB$ , *Com-sntB*, and wild-type (WT) strains at 29°C in dark for 7 days. (B) Statistical of the number of conidia on the surface of peanut and maize kernels. (C) TLC analysis to detect the yield of AFB1 in kernels infected by the above fungal strains after 7 days incubation. (D) Photographs of the silkworms infected by the above fungal strains. (E) The survival rate of silkworms in 5 days after injection of the above strains. (F) Photographs of the dead silkworms infected by *A. flavus*

Figure 2 continued on next page

Figure 2 continued

after 6 days incubation. **(G)** The spore production statistics of the above fungal strains on the dead silkworms shown in **(F)**. **(H)** TLC analysis of AFB1 levels produced in infected dead silkworms in **(F)**.

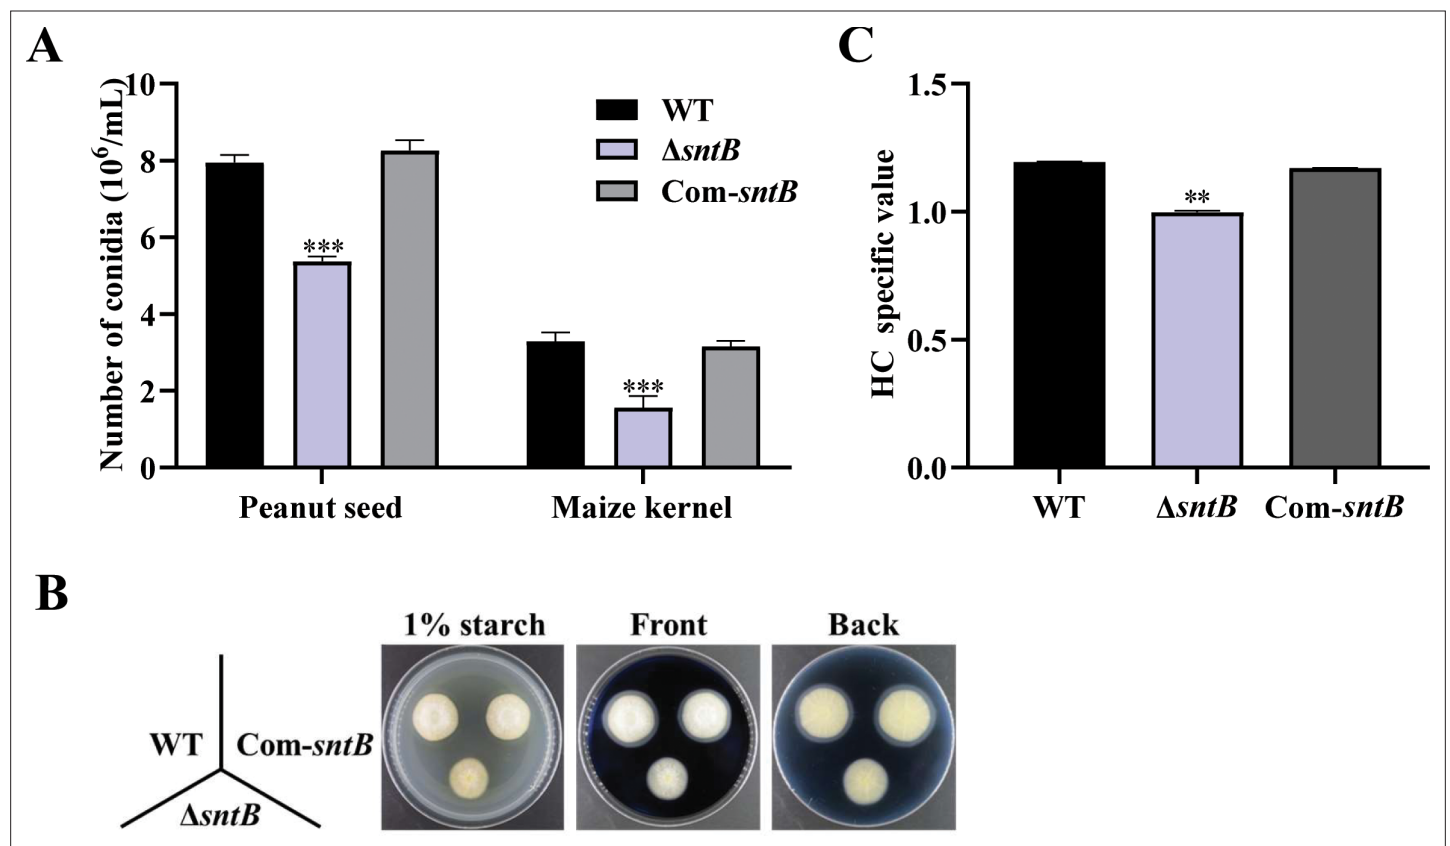

**Figure 2—figure supplement 1.** The changes of number of conidia, amylase, and lipase in wild-type (WT),  $\Delta sntB$ , and Com-*sntB* strains. **(A)** Statistics of the number of conidia on the corn seed. **(B)** The phenotype of each strain on starch screening medium supplemented with 0.1% of soluble starch in darkness at 29°C for 3 days, followed by the addition of iodine solution. **(C)** HC value of the clear circle (outer diameter/inner diameter) of the salient analysis of the map. The asterisk \*\* above the bars represents significantly different ( $p < 0.01$ ).

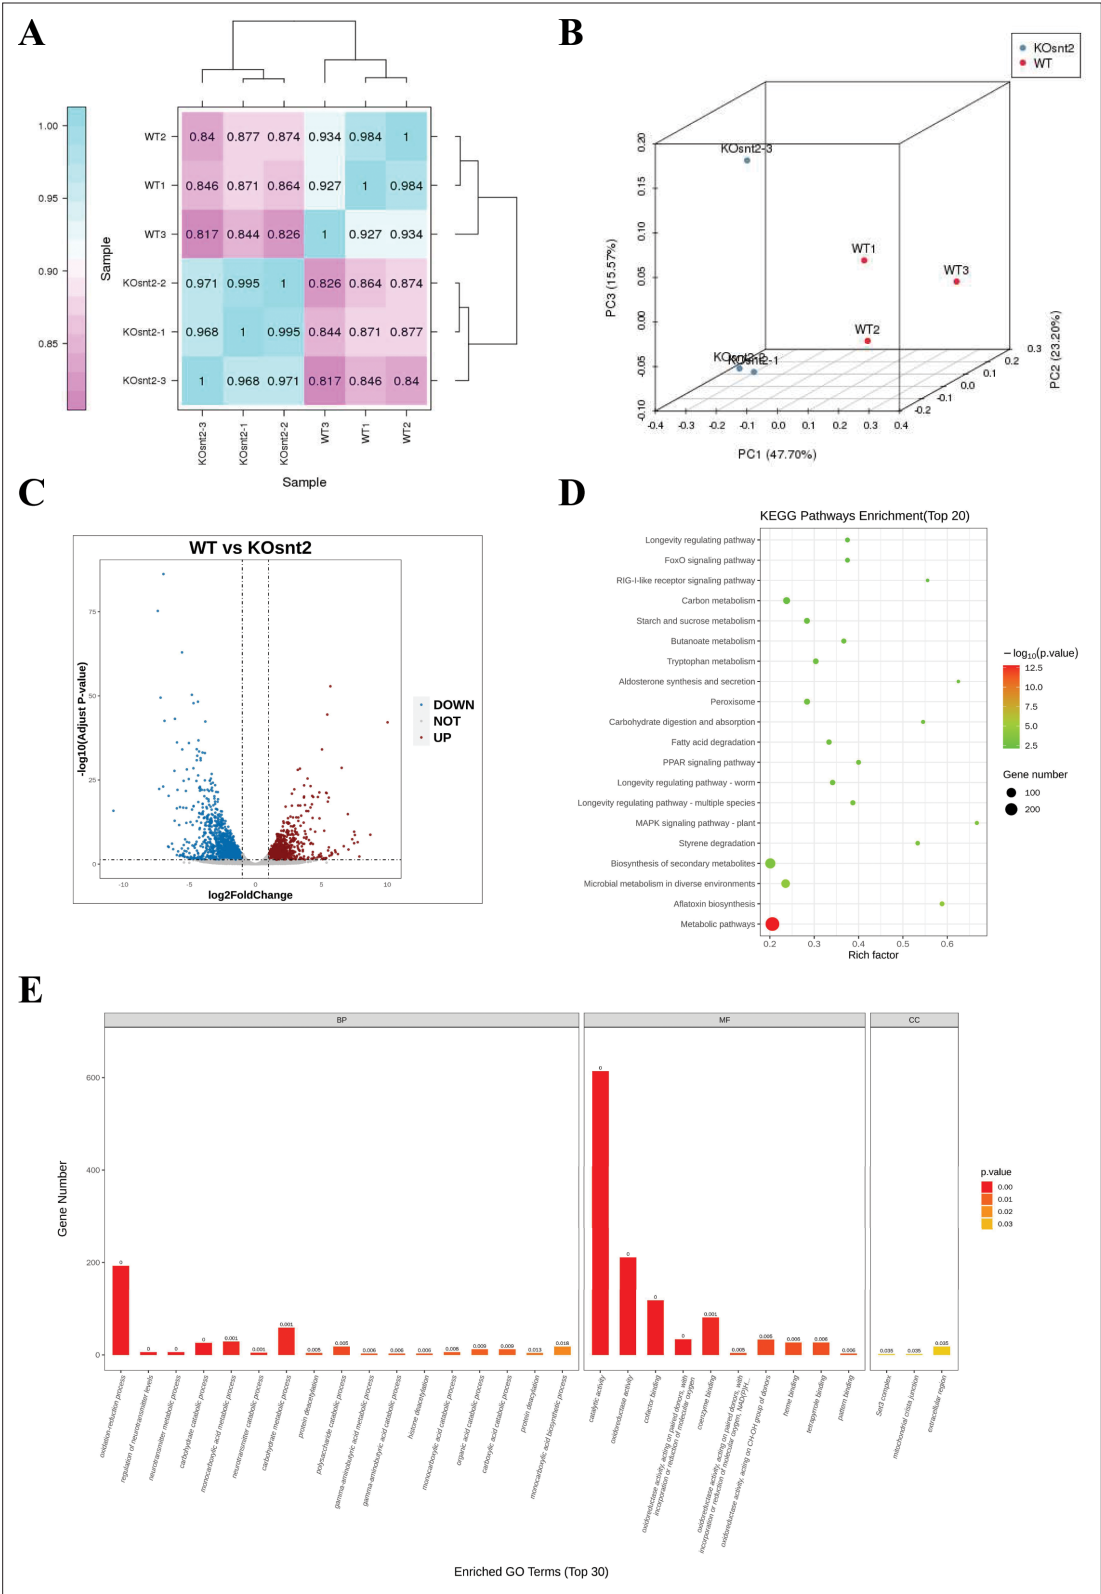

**Figure 3.** SntB chords global gene expression in *A. flavus*. **(A)** The Pearson correlation results shown by heatmap. **(B)** Principal component analysis (PCA) on six fungal samples, including three  $\Delta$ sntB (KOant2) and three wild-type (WT) samples. **(C)** Volcano map reflecting the distribution of the differentially expressed genes. **(D)** Kyoto encyclopedia of genes and genomes (KEGG) analyses of the differentially expressed genes. **(E)** Gene ontology (GO) analyses of the differentially expressed genes.

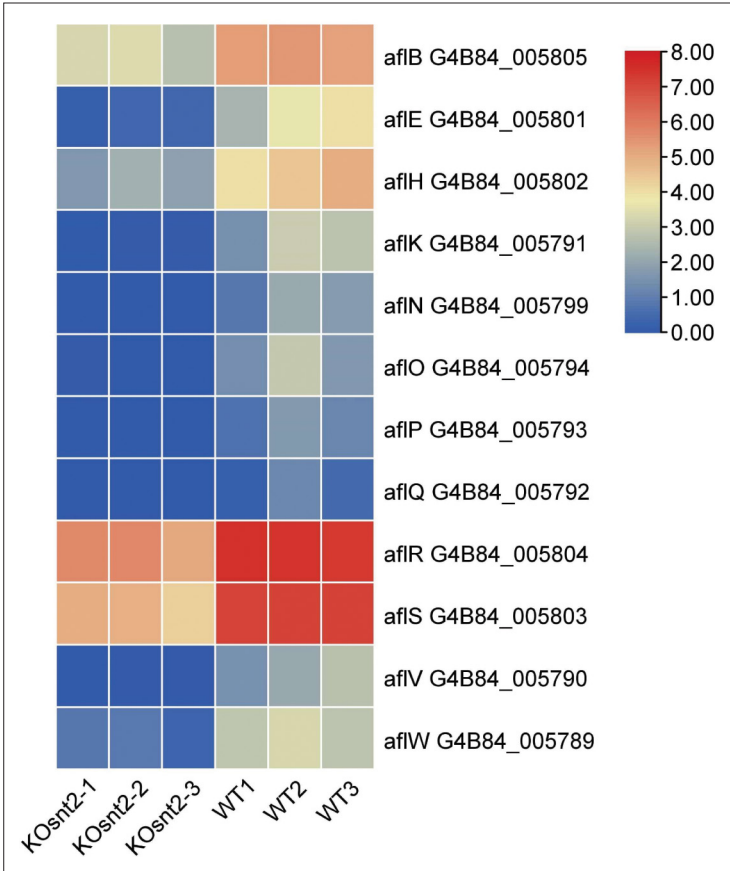

**Figure 3—figure supplement 1.** Heatmap of the differentially expressed genes (DEGs) related to oxidative response in transcriptome data drawn by TBtools.

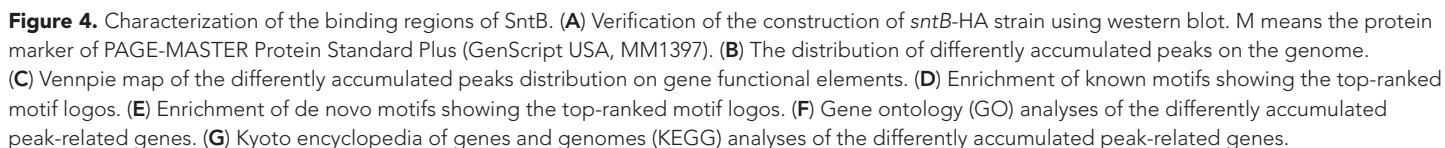



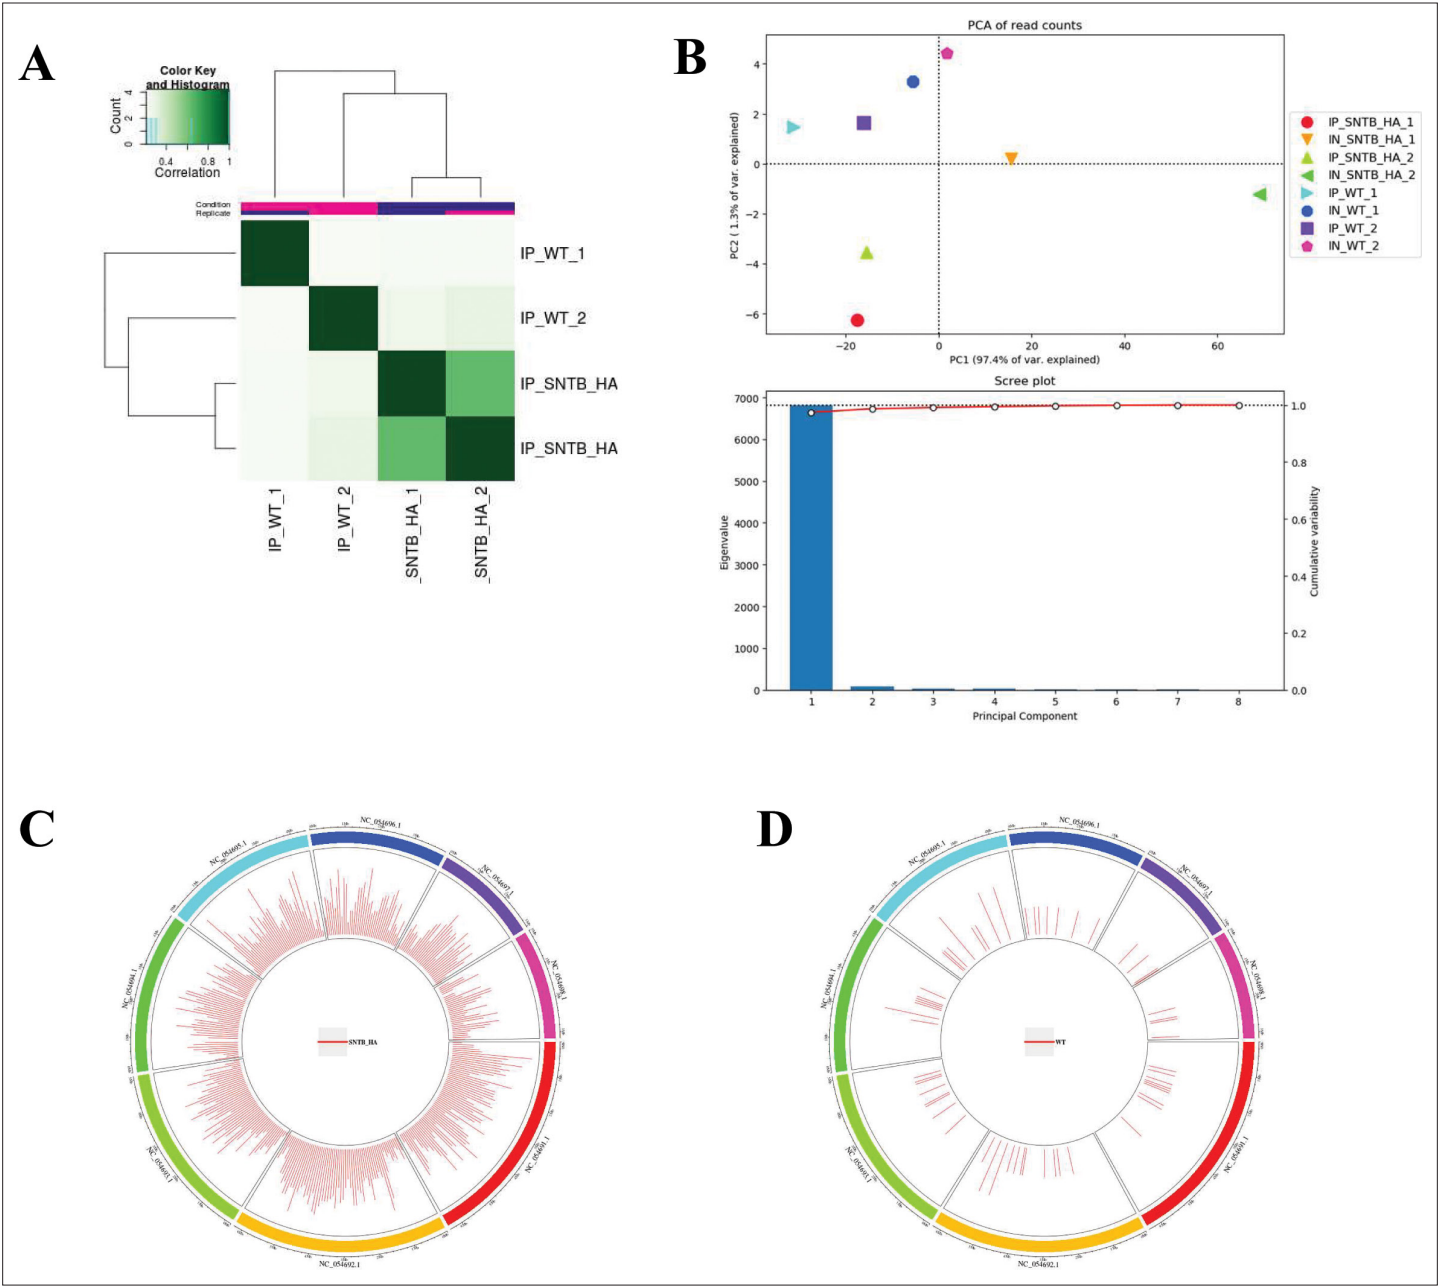

**Figure 4—figure supplement 1.** Sequence information of chromatin immunoprecipitation sequencing (ChIP-seq). **(A)** Heatmap. **(B)** Principal component analysis (PCA). **(C)** Peak distribution on the genome of SNTB-HA group. **(D)** Peak distribution on the genome of wild-type (WT) group.



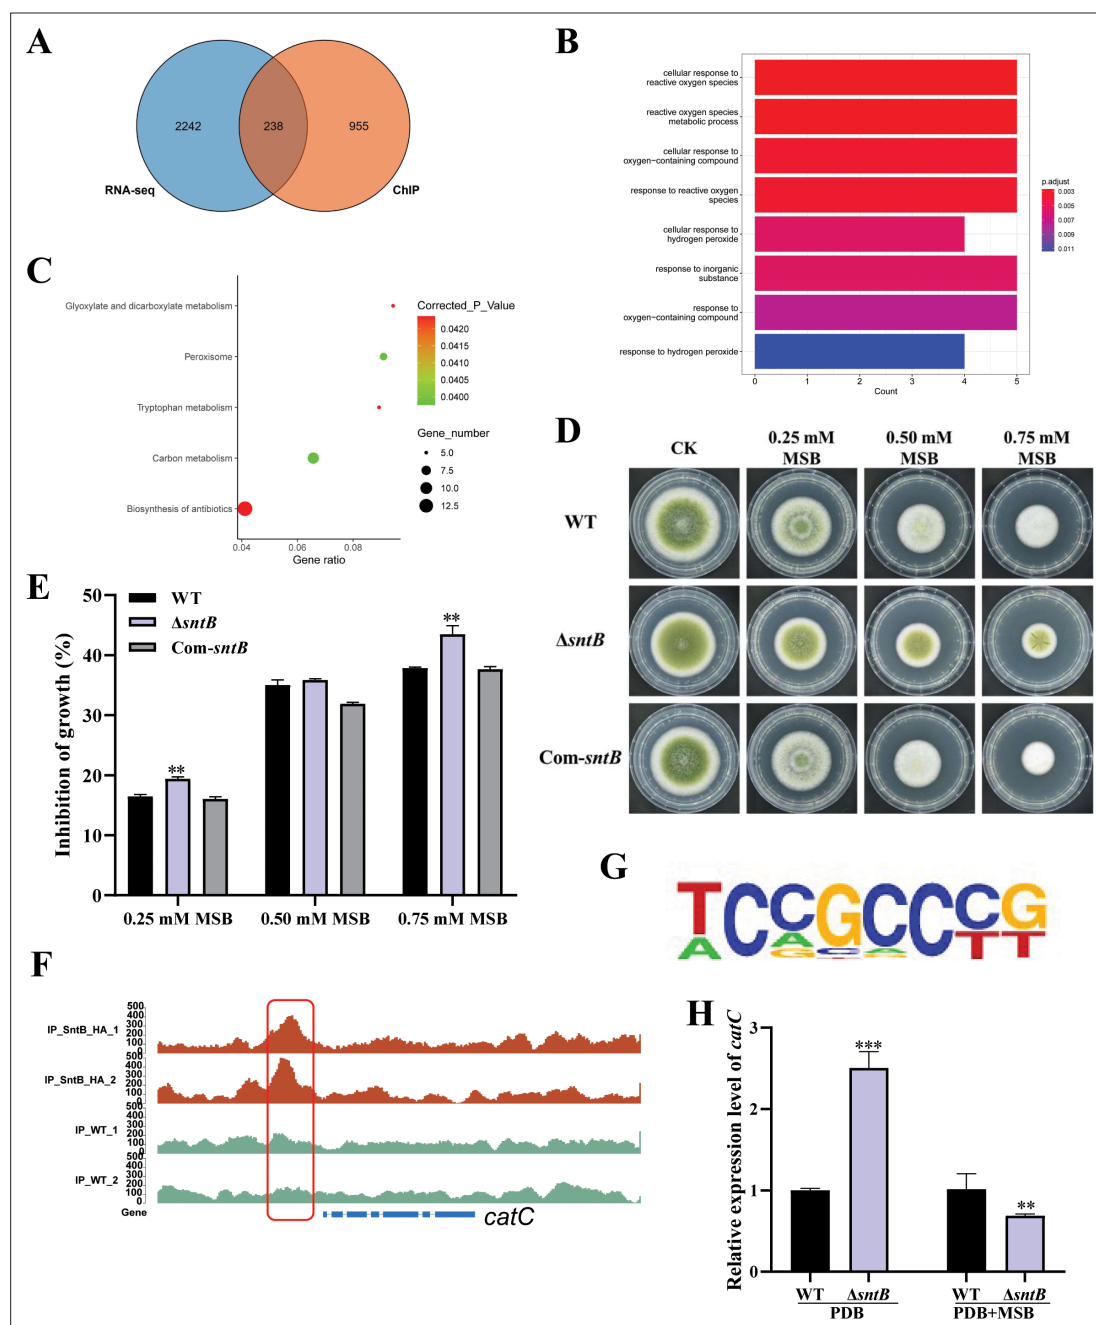

**Figure 5.** Integration of the results of chromatin immunoprecipitation sequencing (ChIP-seq) and RNA sequencing (RNA-seq) assays. **(A)** Venn diagrams of ChIP-seq and RNA-seq. **(B)** Gene ontology (GO) analyses of the common genes. **(C)** Kyoto encyclopedia of genes and genomes (KEGG) analyses of the common genes. **(D)** The phenotype of wild-type (WT),  $\Delta sntB$ , and *Com-sntB* strains cultured in PDA containing a series concentration of menadione sodium bisulfite (MSB) for 3 days. **(E)** Statistical analysis of the growth inhibition rate of MSB to all the above fungal strains according to Panel D. **(F)** Comparison of the enrich levels of the SntB binding region of *catC* gene between WT and *sntB*-HA strains. **(G)** The motif logo in the SntB binding region of *catC* gene. **(H)** The relative expression level of *catC* in WT and  $\Delta sntB$  strains with or without MSB treatment.

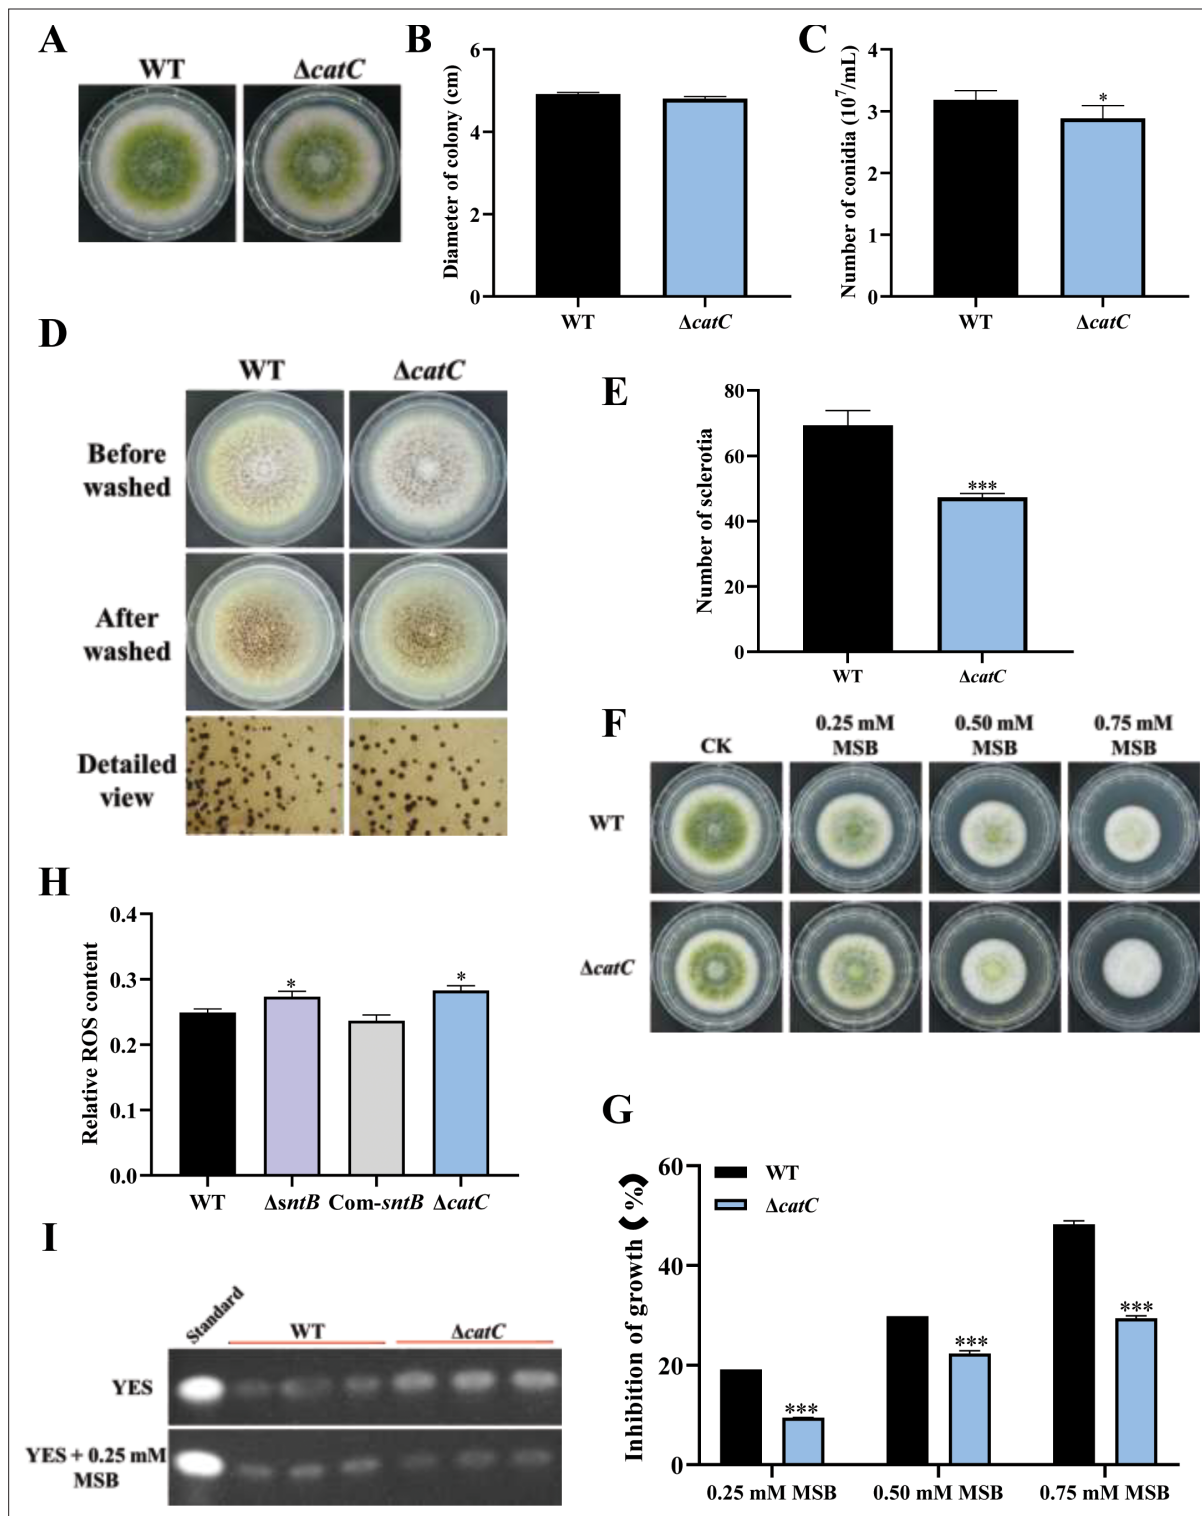

**Figure 6.** The functions of *catC* in *A. flavus*. **(A)** The colonies of wild-type (WT) and  $\Delta catC$  strains grown on potato dextrose agar (PDA) at 37°C in dark for 4 days. **(B)** The colony diameter statistics of the above fungal strains. **(C)** The spore production statistics of the above fungal strains. **(D)** All above fungal strains were point-inoculated on complete medium (CM) and grown for 7 days at 37°C. **(E)** The number of sclerotia of the above fungal strains. **(F)** The phenotype of above strains cultured on PDA medium containing a series concentration of menadione sodium bisulfite (MSB) for 3 days. **(G)** Statistical analysis of the growth inhibition rate of MSB to all the above fungal strains according to **(F)**. **(H)** Relative reactive oxygen species (ROS) levels in the WT,  $\Delta sntB$ , Com-*sntB*, and  $\Delta catC$  strains. **(I)** AFB1 production of the above fungal strains was detected by TLC after the strains incubating at 29°C in potato dextrose (PDB) medium for 7 days.

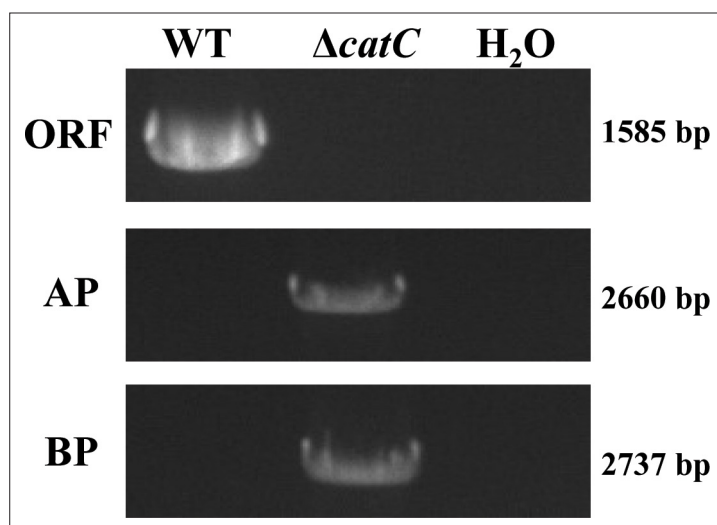

**Figure 6—figure supplement 1.** PCR verification of gDNA in wild-type (WT) and  $\Delta catC$ .

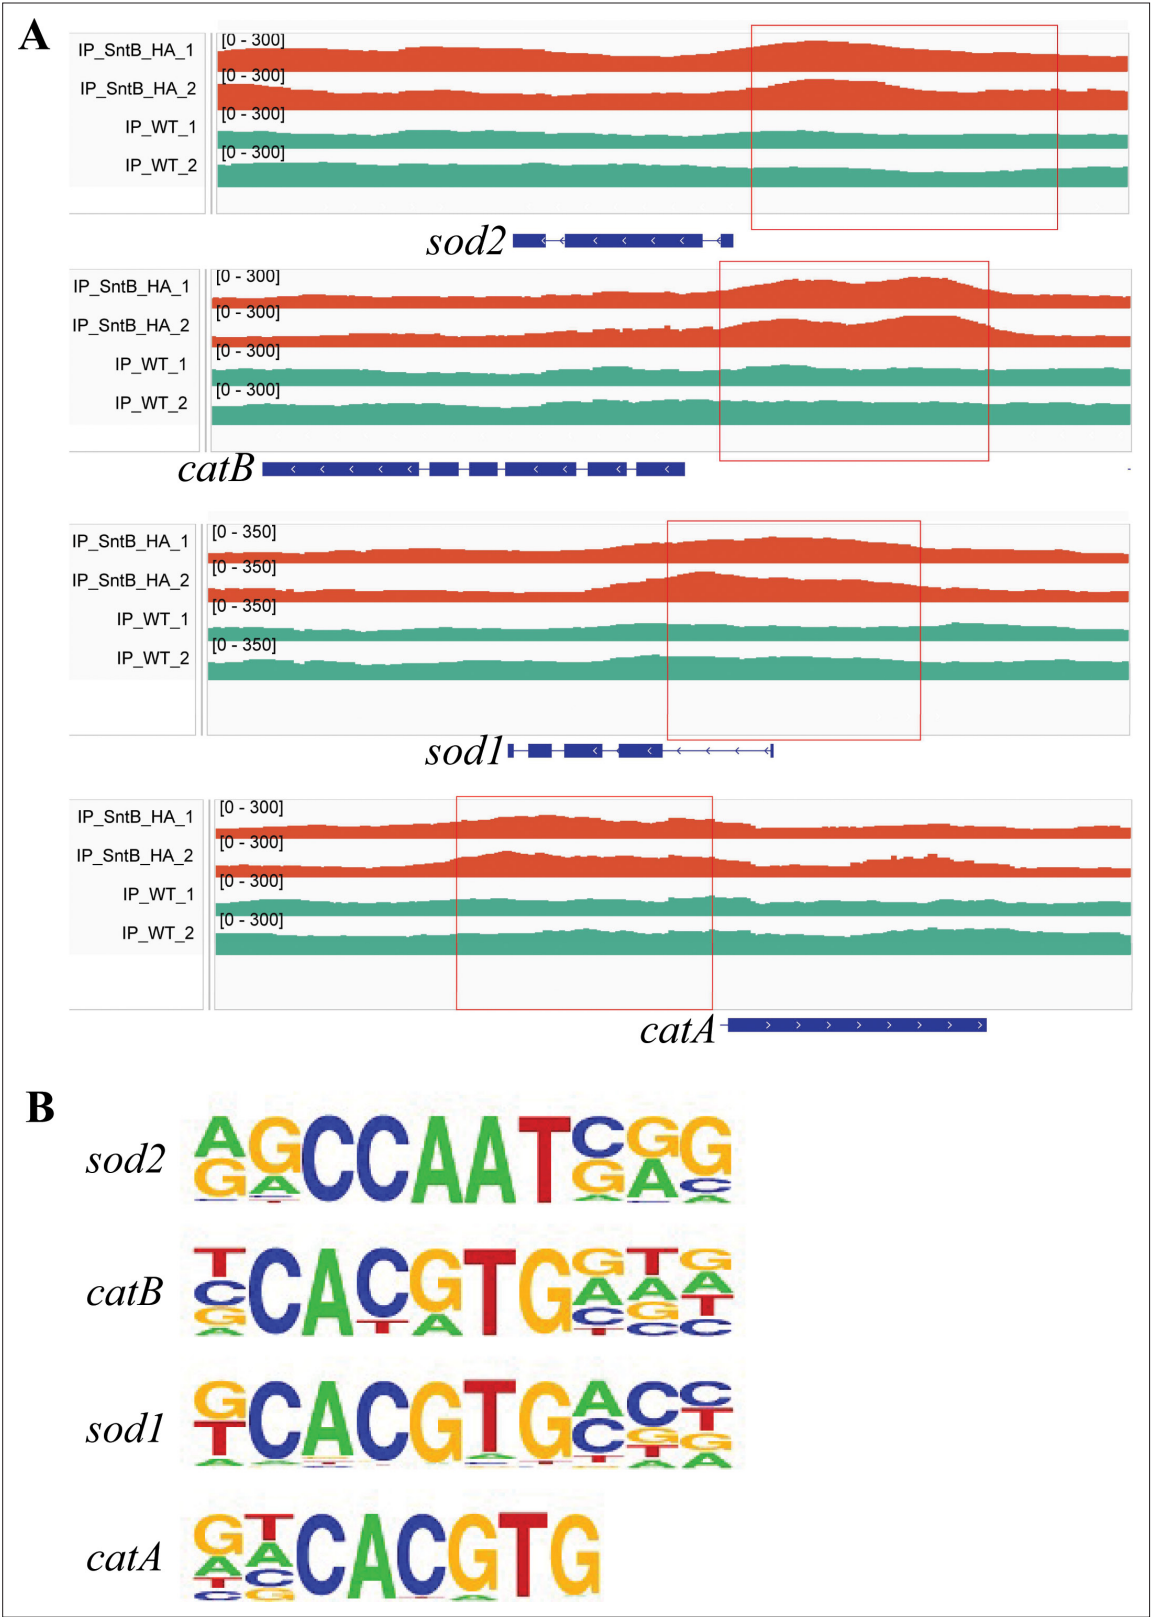

**Figure 6—figure supplement 2.** The binding region and motif of SntB on the *catA*, *catB*, *sod1*, and *sod2* genes. **(A)** Comparison of the enrich levels of the SntB binding region of *catA*, *catB*, *sod1*, and *sod2* genes between wild-type (WT) and *sntB*-HA strains. **(B)** The motif logo in the SntB binding region of *catA*, *catB*, *sod1*, and *sod2* genes.

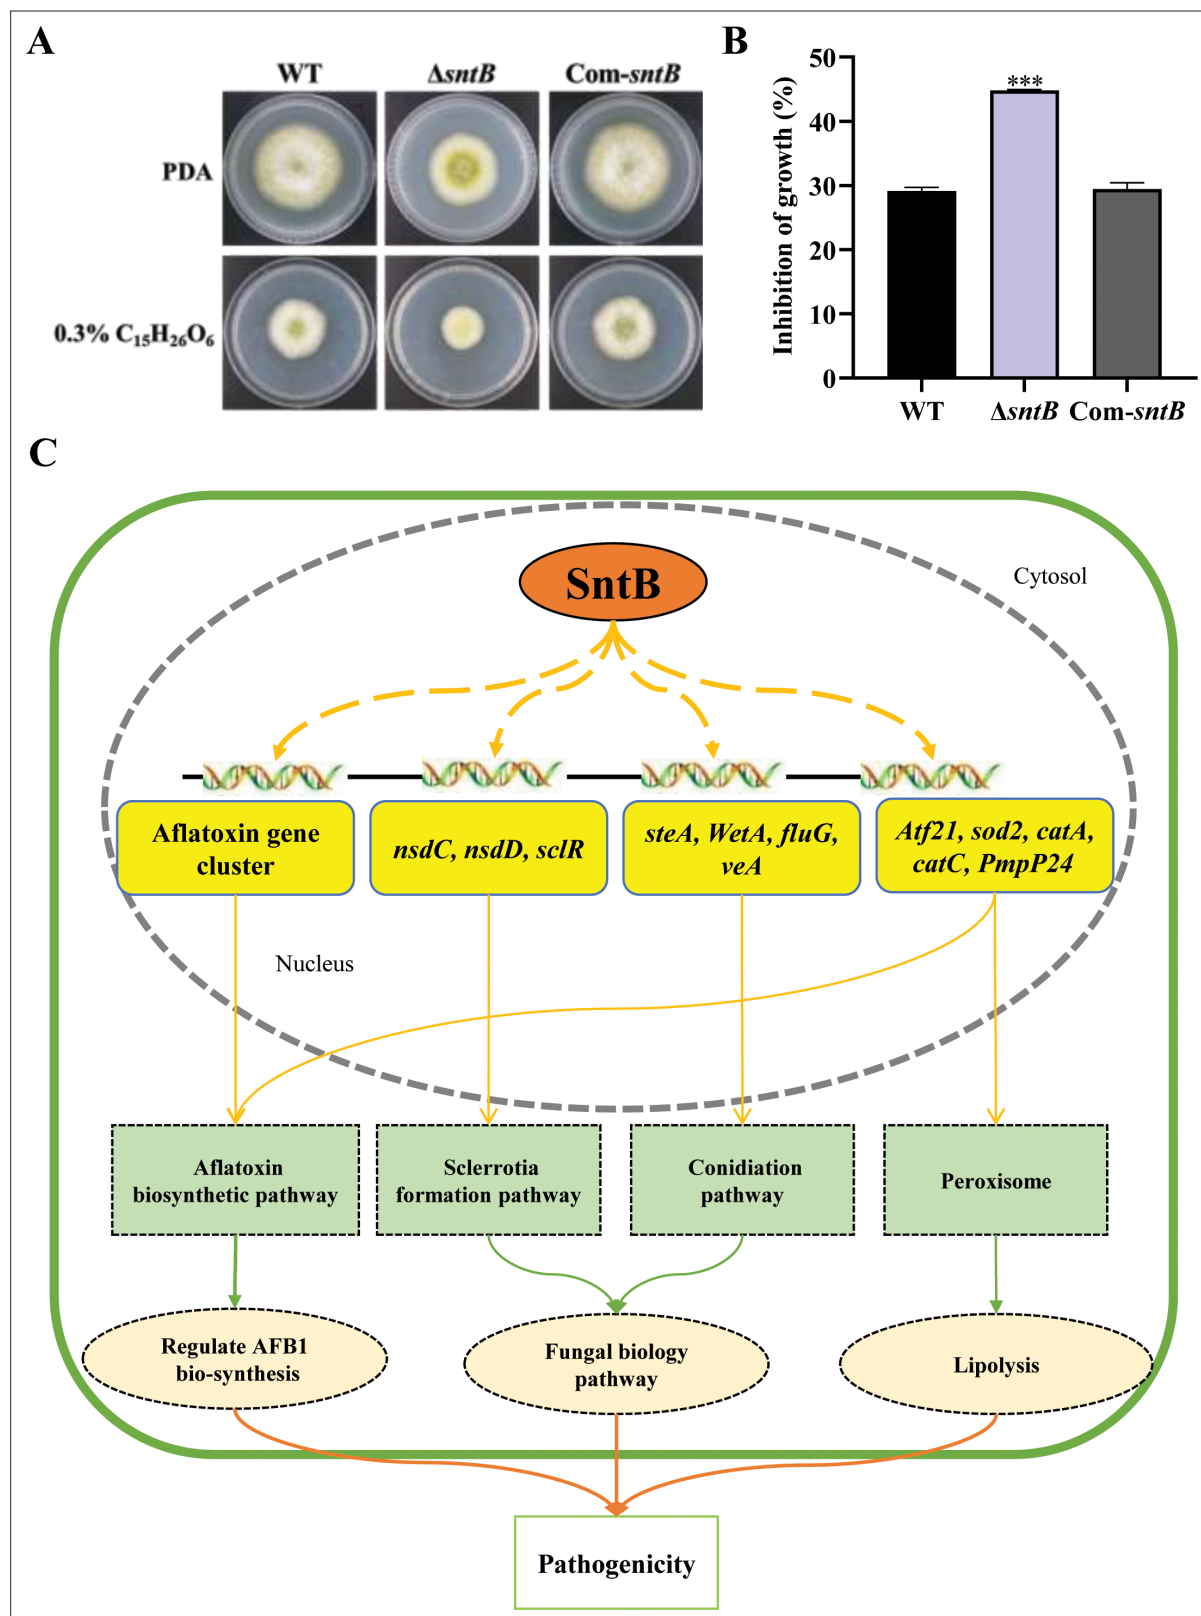

**Figure 7.** SntB regulate peroxisome biogenesis, fatty acid utilization, and fungal pathogenicity in *A. flavus*. **(A)** The phenotype of each strain on PDA medium containing 0.3% tributyrin. **(B)** Statistics of inhibition rates. The asterisk \*\*\* above the bars represents significantly different ( $p < 0.001$ ). **(C)** Mechanistic diagram of the bio-functions of SntB in *A. flavus*.
