# Supplementary material for: SntB triggers the antioxidant pathways to regulate development and aflatoxin biosynthesis in Aspergillus flavus
Source: eLife. 2024 Nov 5;13:RP94743. doi: 10.7554/eLife.94743 (PMC11537487; doi:10.7554/eLife.94743)
Supplement: Supplementary file 1. — (a) Sequencing data statistics in RNA-seq. (b) Alignment results of each sample in RNA-seq. (c) The information of differentially expressed genes (DEGs) in transcriptome data. (d) Gene ontology (GO) enriched in the DEGs in transcriptome data. (e) Kyoto encyclopedia of genes and genomes (KEGG) pathways enriched of the DEGs in transcriptome data. (f) Sequencing data statistics in chromatin immunoprecipitation sequencing (ChIP-seq). (g) Alignment results of each sample in ChIP-seq. (h) The information of up-regulated peak in ChIP-seq data. (i) Known motifs identified by HOMER motif enrichment analysis software. (j) GO enriched in the up-regulated genes in ChIP-seq data. (k) KEGG enriched in the up-regulated genes in ChIP-seq data. (l) GO enriched in the 238 common DEGs in RNA-seq and ChIP-seq data. (m) KEGG enriched in the 238 common DEGs in RNA-seq and ChIP-seq data. (n) The information of DEGs related to lipase activity in transcriptome data. (o) The information of DEGs related to oxidative response in transcriptome data. [file elife-94743-supp1.xlsx]

## Sheet: Sheet1a
Supplementary file 1a. Sequencing data statistics in RNA-seq
Sample	Raw_reads	Clean_reads	Clean_bases	Error(%)	Q20(%)	Q30(%)	GC(%)
KOsnt2-1	93817156	93193384	13.59G	0.03	97.73	93.43	51.93
KOsnt2-2	86389114	85858694	12.59G	0.03	97.69	93.35	51.9
KOsnt2-3	83072408	82650510	12.07G	0.03	97.8	93.53	51.84
WT1	80072694	79510572	11.59G	0.03	97.72	93.4	51.61
WT2	80146028	79615110	11.67G	0.03	97.62	93.19	51.97
WT3	76937732	76493702	11.17G	0.03	97.74	93.43	51.62

## Sheet: Sheet1b
Supplementary file 1b. Alignment results of each sample in RNA-seq
Sample name	Total reads	Total mapped	Multiple mapped	Unique mapped	Reads map to '+'	Reads map to '-'	Non-splice reads	Splice reads
KOsnt2-1	93193384	88692261(95.17%)	29906886(32.09%)	58785375(63.08%)	29398871(31.55%)	29386504(31.53%)	43218906(46.38%)	15566469(16.70%)
KOsnt2-2	85858694	81980977(95.48%)	29575930(34.45%)	52405047(61.04%)	26207505(30.52%)	26197542(30.51%)	38405036(44.73%)	14000011(16.31%)
KOsnt2-3	82650510	79179486(95.80%)	39269950(47.51%)	39909536(48.29%)	19960622(24.15%)	19948914(24.14%)	28025630(33.91%)	11883906(14.38%)
WT1	79510572	75871193(95.42%)	29877444(37.58%)	45993749(57.85%)	23002801(28.93%)	22990948(28.92%)	33710640(42.40%)	12283109(15.45%)
WT2	79615110	76177808(95.68%)	27004057(33.92%)	49173751(61.76%)	24598687(30.90%)	24575064(30.87%)	36125804(45.38%)	13047947(16.39%)
WT3	76493702	73181880(95.67%)	30181230(39.46%)	43000650(56.21%)	21513492(28.12%)	21487158(28.09%)	31263712(40.87%)	11736938(15.34%)

## Sheet: Sheet1c
Supplementary file 1c. The information of DEGs in transcriptome data
gene_id	WT_readcount	KOsnt2_readcount	log2FoldChange	pvalue	padj	symbol	description
G4B84_000099	14.81	132.35	-3.1474	6.0344e-14	3.4364e-12	gene-G4B84_000099	-
G4B84_000670	413.61	1721.49	-2.0578	1.4752e-13	7.8361e-12	gene-G4B84_000670	-
G4B84_002700	53.52	596.35	-3.4823	9.6999e-10	3.0428e-08	gene-G4B84_002700	-
G4B84_012279	102.07	16.54	2.6721	1.0453e-08	2.7023e-07	gene-G4B84_012279	-
G4B84_006095	4.73	49.17	-3.3579	4.0833e-08	9.3262e-07	gene-G4B84_006095	-
G4B84_011552	2090.1	8494.9	-2.0234	1.247e-07	2.5929e-06	gene-G4B84_011552	-
G4B84_012150	2496.32	910.79	1.4555	3.3485e-07	6.198e-06	gene-G4B84_012150	-
G4B84_011139	1201.23	3094.19	-1.3653	6.0767e-05	0.0006328	gene-G4B84_011139	-
G4B84_007033	79841.4	24876.2	1.6824	7.1596e-05	0.00072993	gene-G4B84_007033	-
G4B84_008218	1053.36	480.09	1.1331	0.00010015	0.00097395	gene-G4B84_008218	-
G4B84_008247	40808.6	18104.8	1.1725	0.0012259	0.0081969	gene-G4B84_008247	-
G4B84_007890	27.02	69.55	-1.3717	0.0043429	0.023127	gene-G4B84_007890	-
G4B84_005709	27.87	71.49	-1.3699	0.0066511	0.032756	gene-G4B84_005709	-
G4B84_005125	65.93	151.65	-1.2115	0.0074012	0.035631	gene-G4B84_005125	-
G4B84_002027	78.29	9849.74	-6.9768	4.9739e-91	6.2879e-87	gene-G4B84_002027	-
G4B84_002378	15.16	2583.71	-7.4061	9.0285e-80	5.7069e-76	gene-G4B84_002378	-
Novel.1595	2346.87	111423	-5.5691	2.803e-67	1.1812e-63	-	-
G4B84_005814	3000.35	57.6	5.6837	4.5103e-57	1.4255e-53	gene-G4B84_005814	-
G4B84_007948	134.26	3781.41	-4.8215	1.9053e-54	4.8173e-51	gene-G4B84_007948	-
G4B84_005880	9.02	1307.46	-7.1956	1.5992e-53	3.3696e-50	gene-G4B84_005880	-
G4B84_003198	89.61	1839.11	-4.3604	3.0571e-52	5.521e-49	gene-G4B84_003198	-
G4B84_009684	38.27	994.71	-4.6963	9.4299e-52	1.4902e-48	gene-G4B84_009684	-
G4B84_005815	1397.17	32.06	5.4485	2.5643e-48	3.602e-45	gene-G4B84_005815	-
G4B84_003100	8.04	559.14	-6.1056	5.3353e-47	6.7449e-44	gene-G4B84_003100	-
G4B84_003993	7.58	921.06	-6.8962	2.3274e-46	2.6748e-43	gene-G4B84_003993	-
G4B84_003628	267.18	3720.24	-3.8001	4.0495e-46	4.2662e-43	gene-G4B84_003628	-
G4B84_003515	2173.47	2.19	10.0195	7.4907e-46	7.2845e-43	gene-G4B84_003515	-
G4B84_006225	69.06	1374.21	-4.3225	1.8769e-40	1.6948e-37	gene-G4B84_006225	-
G4B84_010842	221.1	13625.1	-5.9486	8.0981e-40	6.8251e-37	gene-G4B84_010842	-
G4B84_004930	12.98	427.18	-5.0438	1.336e-39	1.0556e-36	gene-G4B84_004930	-
G4B84_002196	438.96	9609.36	-4.4525	9.5983e-38	7.1378e-35	gene-G4B84_002196	-
G4B84_001129	13.42	610.61	-5.5505	1.2533e-37	8.3391e-35	gene-G4B84_001129	-
G4B84_012053	2556.19	77.54	5.0481	1.2236e-37	8.3391e-35	gene-G4B84_012053	-
G4B84_011653	71.91	1385.1	-4.2768	5.2158e-37	3.2969e-34	gene-G4B84_011653	-
G4B84_005091	558.38	8998.65	-4.0103	1.1715e-36	7.0526e-34	gene-G4B84_005091	-
G4B84_000902	233.39	3324.14	-3.8326	1.7037e-36	9.7902e-34	gene-G4B84_000902	-
Novel.3953	253.65	5384.28	-4.4116	1.1425e-35	6.2799e-33	-	-
G4B84_006658	61.49	1104.12	-4.1597	6.003e-35	3.1621e-32	gene-G4B84_006658	-
G4B84_009390	17.19	381.48	-4.4515	2.6899e-34	1.3602e-31	gene-G4B84_009390	-
Novel.8037	214.2	3805.61	-4.1542	2.7988e-34	1.3608e-31	-	-
G4B84_005624	5354.02	57.54	6.5391	5.2878e-32	2.4759e-29	gene-G4B84_005624	-
G4B84_004266	28.77	764.43	-4.7051	7.2372e-32	3.2676e-29	gene-G4B84_004266	-
G4B84_009659	9681.17	933.35	3.3745	9.7223e-32	4.2383e-29	gene-G4B84_009659	-
G4B84_010411	9.15	345.59	-5.2022	1.6975e-31	7.1533e-29	gene-G4B84_010411	-
G4B84_010780	3516.63	380.48	3.2096	2.4098e-31	9.8275e-29	gene-G4B84_010780	-
G4B84_004551	5.33	365.8	-6.1427	4.948e-31	1.9548e-28	gene-G4B84_004551	-
G4B84_009450	186.87	1867.29	-3.3191	4.2247e-30	1.6184e-27	gene-G4B84_009450	-
G4B84_004000	31.11	622.2	-4.346	1.1575e-29	4.3039e-27	gene-G4B84_004000	-
G4B84_002585	4610.85	297.03	3.9525	1.0268e-28	3.7089e-26	gene-G4B84_002585	-
G4B84_005379	43.99	458.82	-3.3794	1.0964e-28	3.8502e-26	gene-G4B84_005379	-
G4B84_004788	31.18	1022.95	-5.0557	1.5144e-28	5.1745e-26	gene-G4B84_004788	-
G4B84_000823	43.22	617.95	-3.8368	3.8249e-28	1.2725e-25	gene-G4B84_000823	-
G4B84_001132	41.29	451.68	-3.4556	4.8574e-28	1.5352e-25	gene-G4B84_001132	-
G4B84_009711	111.17	1224.35	-3.4624	4.8353e-28	1.5352e-25	gene-G4B84_009711	-
Novel.8614	6.2	268.98	-5.4448	5.8088e-28	1.7911e-25	-	-
G4B84_005443	38.35	848.06	-4.4753	6.3488e-28	1.911e-25	gene-G4B84_005443	-
G4B84_011645	1368.88	12845.8	-3.2306	2.2212e-27	6.5304e-25	gene-G4B84_011645	-
G4B84_008283	199.51	2064.58	-3.3737	4.5782e-27	1.3154e-24	gene-G4B84_008283	-
G4B84_007640	79.91	666.52	-3.0557	1.2293e-26	3.4536e-24	gene-G4B84_007640	-
G4B84_009171	1516.97	118.52	3.6901	1.4443e-26	3.9692e-24	gene-G4B84_009171	-
G4B84_004426	841.1	47.08	4.1824	2.4619e-26	6.622e-24	gene-G4B84_004426	-
G4B84_009069	3.36	431.52	-6.9955	3.4389e-26	9.0571e-24	gene-G4B84_009069	-
G4B84_002619	144.5	2661.4	-4.2089	4.0899e-26	1.0552e-23	gene-G4B84_002619	-
G4B84_011836	120.13	1180.26	-3.2982	7.5998e-26	1.9215e-23	gene-G4B84_011836	-
G4B84_011717	29.29	568.85	-4.2644	9.2136e-26	2.2839e-23	gene-G4B84_011717	-
G4B84_000137	338.54	6140.89	-4.1827	1.3215e-25	3.2128e-23	gene-G4B84_000137	-
G4B84_004082	1.79	316.12	-7.2998	1.9342e-25	4.6136e-23	gene-G4B84_004082	-
Novel.590	8895.72	1153.25	2.9479	2.5378e-25	5.9412e-23	-	-
G4B84_005413	178.93	1819.41	-3.3488	3.2856e-25	7.4892e-23	gene-G4B84_005413	-
G4B84_009309	115.75	1441.25	-3.6337	3.3175e-25	7.4892e-23	gene-G4B84_009309	-
G4B84_008325	377.27	6342.77	-4.0694	4.0288e-25	8.7815e-23	gene-G4B84_008325	-
Novel.3130	7.24	414.02	-5.9128	3.987e-25	8.7815e-23	-	-
G4B84_004928	18.35	263.44	-3.8676	4.7862e-25	1.0256e-22	gene-G4B84_004928	-
G4B84_008856	130.02	2415.9	-4.2118	7.109e-25	1.4979e-22	gene-G4B84_008856	-
G4B84_011366	198.96	1920.79	-3.271	7.9329e-25	1.6441e-22	gene-G4B84_011366	-
G4B84_010050	7.1	260.64	-5.2748	8.9749e-25	1.83e-22	gene-G4B84_010050	-
G4B84_001739	80.67	934.49	-3.5215	9.6488e-25	1.9362e-22	gene-G4B84_001739	-
G4B84_002182	4990	39423.9	-2.982	1.8031e-24	3.5616e-22	gene-G4B84_002182	-
G4B84_000699	1003.05	7228.78	-2.8492	2.0464e-24	3.9801e-22	gene-G4B84_000699	-
G4B84_012052	2387.62	83.16	4.8469	2.5727e-24	4.9279e-22	gene-G4B84_012052	-
G4B84_005801	595.46	15.17	5.3598	3.299e-24	6.2247e-22	gene-G4B84_005801	-
G4B84_002057	38625.3	915.66	5.399	4.2985e-24	7.9914e-22	gene-G4B84_002057	-
G4B84_009999	2175.53	319.84	2.7652	6.3826e-24	1.1694e-21	gene-G4B84_009999	-
G4B84_004525	2.8	263.84	-6.5829	2.8844e-23	5.2092e-21	gene-G4B84_004525	-
G4B84_002830	13169.7	665.57	4.3061	3.0197e-23	5.3768e-21	gene-G4B84_002830	-
Novel.6102	20.55	304.6	-3.8751	3.6909e-23	6.4806e-21	-	-
G4B84_012231	186.89	1618.52	-3.1145	3.865e-23	6.6933e-21	gene-G4B84_012231	-
G4B84_008985	852.56	65.87	3.686	4.847e-23	8.2805e-21	gene-G4B84_008985	-
G4B84_011046	623.01	29.96	4.3834	6.7814e-23	1.128e-20	gene-G4B84_011046	-
G4B84_011702	265.41	9.31	4.734	6.6956e-23	1.128e-20	gene-G4B84_011702	-
G4B84_005917	2388.56	187.97	3.675	9.9836e-23	1.6391e-20	gene-G4B84_005917	-
G4B84_005798	289.69	5.66	5.5624	1.0483e-22	1.6991e-20	gene-G4B84_005798	-
G4B84_008668	93.51	1209.34	-3.6953	1.8589e-22	2.9747e-20	gene-G4B84_008668	-
G4B84_006657	48.87	421.54	-3.1121	1.9511e-22	3.0832e-20	gene-G4B84_006657	-
G4B84_009621	15199.3	108342	-2.8335	3.2871e-22	5.1302e-20	gene-G4B84_009621	-
G4B84_010365	30.2	353.81	-3.5633	3.7496e-22	5.7808e-20	gene-G4B84_010365	-
G4B84_008385	30.86	358.68	-3.5473	1.4347e-21	2.1852e-19	gene-G4B84_008385	-
Novel.733	166.62	1392.17	-3.0644	1.7384e-21	2.6163e-19	-	-
G4B84_005625	1248.32	27.8	5.4889	1.8438e-21	2.7422e-19	gene-G4B84_005625	-
G4B84_006010	67.96	496.4	-2.8692	2.011e-21	2.9561e-19	gene-G4B84_006010	-
G4B84_000757	316.54	6378.72	-4.3343	2.4383e-21	3.5431e-19	gene-G4B84_000757	-
G4B84_001843	40.14	647.97	-4.0029	8.2148e-21	1.1801e-18	gene-G4B84_001843	-
G4B84_004353	306.12	2543.32	-3.0568	8.9427e-21	1.2703e-18	gene-G4B84_004353	-
G4B84_007668	69.7	1128.03	-4.0053	9.4458e-21	1.3268e-18	gene-G4B84_007668	-
G4B84_011975	551.66	29.03	4.2821	1.2153e-20	1.6883e-18	gene-G4B84_011975	-
G4B84_012200	28.53	324.65	-3.5102	1.7761e-20	2.4406e-18	gene-G4B84_012200	-
G4B84_010153	239.36	17.52	3.7575	2.0067e-20	2.7279e-18	gene-G4B84_010153	-
G4B84_004091	59.05	535.46	-3.1886	2.4239e-20	3.2598e-18	gene-G4B84_004091	-
G4B84_006449	25027.3	2651.22	3.2389	2.8458e-20	3.787e-18	gene-G4B84_006449	-
G4B84_005812	12755.9	1207.78	3.4002	2.9746e-20	3.9171e-18	gene-G4B84_005812	-
G4B84_011746	612.19	90.21	2.7636	3.334e-20	4.3452e-18	gene-G4B84_011746	-
G4B84_008326	68.64	1786.25	-4.69	4.0763e-20	5.2584e-18	gene-G4B84_008326	-
G4B84_006007	15.86	401.02	-4.6959	5.4115e-20	6.9104e-18	gene-G4B84_006007	-
G4B84_010180	143047	29299.3	2.2876	6.4979e-20	8.2147e-18	gene-G4B84_010180	-
G4B84_006426	21.03	222.56	-3.3973	6.7918e-20	8.5011e-18	gene-G4B84_006426	-
G4B84_004732	58.51	763.27	-3.7152	8.6549e-20	1.0727e-17	gene-G4B84_004732	-
Novel.8547	4.41	223.44	-5.7224	9.2911e-20	1.1404e-17	-	-
G4B84_001840	307.12	4907.05	-3.9999	1.1959e-19	1.4537e-17	gene-G4B84_001840	-
G4B84_010495	1921.53	106.06	4.1751	1.2321e-19	1.4834e-17	gene-G4B84_010495	-
Novel.7807	3.8	156.82	-5.4758	1.4047e-19	1.6753e-17	-	-
G4B84_010843	11.21	421.73	-5.2448	1.7561e-19	2.0748e-17	gene-G4B84_010843	-
G4B84_008330	2.6	151.46	-5.9603	2.2711e-19	2.6585e-17	gene-G4B84_008330	-
G4B84_000884	14.43	186	-3.6778	2.4219e-19	2.809e-17	gene-G4B84_000884	-
G4B84_000201	72.74	578.83	-3.0016	3.2743e-19	3.7631e-17	gene-G4B84_000201	-
G4B84_005708	150.91	1141.5	-2.9232	4.3085e-19	4.9071e-17	gene-G4B84_005708	-
G4B84_008713	10.22	300.8	-4.8076	5.4851e-19	6.1913e-17	gene-G4B84_008713	-
G4B84_003409	88.6	660.22	-2.892	5.7041e-19	6.3815e-17	gene-G4B84_003409	-
G4B84_012042	551.06	5507.21	-3.3216	6.0015e-19	6.6554e-17	gene-G4B84_012042	-
G4B84_007635	0	334.91	-10.7686	1.292e-18	1.4203e-16	gene-G4B84_007635	-
G4B84_002688	2570.74	176.78	3.8592	1.5235e-18	1.6604e-16	gene-G4B84_002688	-
G4B84_010229	136.66	8.4	4.0054	1.6339e-18	1.7654e-16	gene-G4B84_010229	-
G4B84_000135	259.63	1596.06	-2.6191	1.7858e-18	1.9132e-16	gene-G4B84_000135	-
G4B84_000558	83.06	1291.63	-3.9665	2.0947e-18	2.2068e-16	gene-G4B84_000558	-
G4B84_009203	218.84	1271.49	-2.5378	2.079e-18	2.2068e-16	gene-G4B84_009203	-
G4B84_011893	88.4	1420.92	-4.0157	4.8792e-18	5.0977e-16	gene-G4B84_011893	-
G4B84_000173	40.56	336.2	-3.0444	5.1901e-18	5.3781e-16	gene-G4B84_000173	-
G4B84_001842	23.72	465.64	-4.2648	6.1384e-18	6.3091e-16	gene-G4B84_001842	-
Novel.8336	30.83	571.24	-4.2379	8.5722e-18	8.7395e-16	-	-
G4B84_004272	18	301.92	-4.1093	1.3709e-17	1.3864e-15	gene-G4B84_004272	-
G4B84_004657	41.45	411.99	-3.3132	1.4079e-17	1.4126e-15	gene-G4B84_004657	-
G4B84_005791	199.34	1.78	7.0074	1.4289e-17	1.4223e-15	gene-G4B84_005791	-
G4B84_003201	117.16	1858.7	-3.9917	1.4499e-17	1.432e-15	gene-G4B84_003201	-
G4B84_000479	124.97	827.97	-2.7314	1.5829e-17	1.5513e-15	gene-G4B84_000479	-
G4B84_003443	16.58	189.69	-3.5511	2.1003e-17	2.0424e-15	gene-G4B84_003443	-
G4B84_000465	4662.8	27641.6	-2.5677	2.2113e-17	2.134e-15	gene-G4B84_000465	-
G4B84_004218	406.81	2933.98	-2.8508	2.3505e-17	2.2511e-15	gene-G4B84_004218	-
G4B84_007607	104.85	988.97	-3.2365	2.538e-17	2.4124e-15	gene-G4B84_007607	-
G4B84_010814	252.78	3059.12	-3.6008	3.6778e-17	3.4698e-15	gene-G4B84_010814	-
G4B84_011974	1656.41	150.39	3.4696	4.2588e-17	3.9882e-15	gene-G4B84_011974	-
G4B84_007075	19.08	236.45	-3.6739	6.3944e-17	5.944e-15	gene-G4B84_007075	-
G4B84_008782	57.63	482.34	-3.0768	6.649e-17	6.1355e-15	gene-G4B84_008782	-
G4B84_000389	702.6	4881.58	-2.7964	7.1044e-17	6.5083e-15	gene-G4B84_000389	-
G4B84_011627	11736.9	1860.19	2.6573	8.1632e-17	7.4244e-15	gene-G4B84_011627	-
G4B84_006370	70.47	444.48	-2.6607	9.0428e-17	8.1657e-15	gene-G4B84_006370	-
G4B84_008506	279.73	3484.09	-3.6416	1.1712e-16	1.0501e-14	gene-G4B84_008506	-
G4B84_007542	20.27	389.89	-4.2946	1.2493e-16	1.1122e-14	gene-G4B84_007542	-
G4B84_007672	47.62	410.53	-3.0996	1.2953e-16	1.1451e-14	gene-G4B84_007672	-
G4B84_005152	19.18	275.95	-3.8568	1.4363e-16	1.2609e-14	gene-G4B84_005152	-
Novel.4708	187.6	1475.69	-2.9801	1.4658e-16	1.2779e-14	-	-
G4B84_005299	80662.7	9412.59	3.0993	1.4973e-16	1.2965e-14	gene-G4B84_005299	-
Novel.4349	469.67	64.41	2.8498	1.5967e-16	1.3731e-14	-	-
G4B84_009979	244.32	26.53	3.251	1.6351e-16	1.3967e-14	gene-G4B84_009979	-
Novel.5225	19.04	234.68	-3.6574	1.6566e-16	1.4056e-14	-	-
G4B84_008684	43.82	369.48	-3.0673	1.8937e-16	1.596e-14	gene-G4B84_008684	-
G4B84_001584	14.44	219.68	-3.8869	2.2541e-16	1.8872e-14	gene-G4B84_001584	-
G4B84_008986	410.63	20.38	4.3327	2.3273e-16	1.9357e-14	gene-G4B84_008986	-
G4B84_007174	29.33	447.03	-3.9191	2.5458e-16	2.1036e-14	gene-G4B84_007174	-
G4B84_012278	1184.26	214.52	2.4686	2.786e-16	2.2871e-14	gene-G4B84_012278	-
G4B84_003478	21.89	228.91	-3.3633	3.0024e-16	2.4488e-14	gene-G4B84_003478	-
G4B84_005813	958.47	32.49	4.8579	3.1984e-16	2.5919e-14	gene-G4B84_005813	-
G4B84_005641	136.39	975.94	-2.8428	3.5664e-16	2.8717e-14	gene-G4B84_005641	-
G4B84_007263	102.08	576.53	-2.4997	3.8857e-16	3.1091e-14	gene-G4B84_007263	-
G4B84_003809	15.06	195.73	-3.6674	4.0462e-16	3.2171e-14	gene-G4B84_003809	-
G4B84_007301	136.29	797.25	-2.5518	4.2598e-16	3.3657e-14	gene-G4B84_007301	-
G4B84_001841	25.64	311.51	-3.6263	5.0474e-16	3.9633e-14	gene-G4B84_001841	-
Novel.2296	19.28	191.65	-3.3385	5.6233e-16	4.3882e-14	-	-
G4B84_005734	549.94	3853.88	-2.8103	7.141e-16	5.5384e-14	gene-G4B84_005734	-
G4B84_007827	16.38	176.94	-3.4334	7.4129e-16	5.7142e-14	gene-G4B84_007827	-
G4B84_003933	193.92	2073.69	-3.4221	8.0613e-16	6.1764e-14	gene-G4B84_003933	-
G4B84_006624	461.74	2851.46	-2.6279	9.6558e-16	7.3535e-14	gene-G4B84_006624	-
G4B84_010739	1874.79	10382.2	-2.4696	1.097e-15	8.304e-14	gene-G4B84_010739	-
G4B84_004629	59.14	614.28	-3.3935	1.1575e-15	8.7099e-14	gene-G4B84_004629	-
G4B84_006942	14.69	150.04	-3.354	1.5138e-15	1.1324e-13	gene-G4B84_006942	-
G4B84_000300	2314.88	12554.1	-2.4387	1.5828e-15	1.177e-13	gene-G4B84_000300	-
G4B84_008097	1.87	121.02	-6.1275	1.7871e-15	1.3212e-13	gene-G4B84_008097	-
G4B84_010415	42.38	354.67	-3.0496	1.8241e-15	1.3407e-13	gene-G4B84_010415	-
G4B84_010072	174.5	18.53	3.2509	2.0052e-15	1.4569e-13	gene-G4B84_010072	-
G4B84_011126	22.67	221.96	-3.3109	1.9996e-15	1.4569e-13	gene-G4B84_011126	-
G4B84_007271	97.48	470.7	-2.2724	2.233e-15	1.6131e-13	gene-G4B84_007271	-
Novel.1136	5.4	114.52	-4.4501	2.362e-15	1.6966e-13	-	-
G4B84_003461	125.32	884.39	-2.8242	2.6701e-15	1.9071e-13	gene-G4B84_003461	-
G4B84_012195	293.54	2244.88	-2.9378	2.8322e-15	2.0115e-13	gene-G4B84_012195	-
Novel.1233	2829.42	651.53	2.1203	2.9125e-15	2.0569e-13	-	-
G4B84_004254	455.71	2729.95	-2.5809	2.951e-15	2.0726e-13	gene-G4B84_004254	-
G4B84_007152	3364.26	37834.5	-3.4916	3.0451e-15	2.1269e-13	gene-G4B84_007152	-
G4B84_012272	118.11	1496.56	-3.6714	3.508e-15	2.4367e-13	gene-G4B84_012272	-
G4B84_000498	80.97	488.45	-2.6006	3.7625e-15	2.5992e-13	gene-G4B84_000498	-
G4B84_005021	106.96	1051.73	-3.3045	3.9425e-15	2.7087e-13	gene-G4B84_005021	-
G4B84_011591	579.9	6624.91	-3.5133	4.3891e-15	2.9993e-13	gene-G4B84_011591	-
G4B84_010964	3.29	103.01	-4.9258	4.5941e-15	3.1225e-13	gene-G4B84_010964	-
G4B84_010793	121.82	817.01	-2.7491	4.9799e-15	3.3666e-13	gene-G4B84_010793	-
G4B84_012277	964.79	173.53	2.4757	5.4722e-15	3.6797e-13	gene-G4B84_012277	-
Novel.1690	1879.84	362.28	2.3772	6.6344e-15	4.4377e-13	-	-
G4B84_005789	277.63	21.66	3.654	7.078e-15	4.7095e-13	gene-G4B84_005789	-
G4B84_009328	136.38	1044.05	-2.9357	7.2474e-15	4.7969e-13	gene-G4B84_009328	-
G4B84_010522	23.01	389.79	-4.1215	7.7237e-15	5.0856e-13	gene-G4B84_010522	-
G4B84_006639	18.39	189.18	-3.3487	8.1567e-15	5.3429e-13	gene-G4B84_006639	-
G4B84_000993	2.98	122.67	-5.2409	8.7182e-15	5.6812e-13	gene-G4B84_000993	-
G4B84_005686	40.09	428.22	-3.4242	8.8818e-15	5.7581e-13	gene-G4B84_005686	-
G4B84_003273	3648.06	824.52	2.1459	9.4837e-15	6.117e-13	gene-G4B84_003273	-
G4B84_003926	46.6	641.61	-3.7894	1.0214e-14	6.5544e-13	gene-G4B84_003926	-
G4B84_011815	15.35	156.49	-3.3509	1.0404e-14	6.6428e-13	gene-G4B84_011815	-
G4B84_004427	2108.24	355.9	2.5658	1.1315e-14	7.1879e-13	gene-G4B84_004427	-
Novel.8054	78.45	449.37	-2.5175	1.1582e-14	7.3208e-13	-	-
G4B84_005762	62.83	314.4	-2.3209	1.3764e-14	8.6572e-13	gene-G4B84_005762	-
G4B84_002882	8217.3	43827.5	-2.4151	1.4414e-14	9.0211e-13	gene-G4B84_002882	-
G4B84_011593	39.77	273.96	-2.7777	1.4926e-14	9.2955e-13	gene-G4B84_011593	-
G4B84_009135	1470.72	8919.04	-2.601	1.5186e-14	9.4108e-13	gene-G4B84_009135	-
G4B84_005803	4089.54	729.45	2.4866	1.6782e-14	1.0349e-12	gene-G4B84_005803	-
G4B84_008692	508.61	2915.01	-2.5191	1.9506e-14	1.1913e-12	gene-G4B84_008692	-
Novel.5283	27.25	294.38	-3.4426	1.9483e-14	1.1913e-12	-	-
G4B84_003119	96.35	647.76	-2.7499	2.3824e-14	1.448e-12	gene-G4B84_003119	-
G4B84_007664	167.09	918.86	-2.4551	2.403e-14	1.4535e-12	gene-G4B84_007664	-
G4B84_002181	55.68	332.4	-2.5874	3.0544e-14	1.8388e-12	gene-G4B84_002181	-
G4B84_009413	92.43	663.7	-2.8529	3.15e-14	1.8873e-12	gene-G4B84_009413	-
G4B84_005471	470.12	3438.61	-2.8722	3.3312e-14	1.9864e-12	gene-G4B84_005471	-
G4B84_003688	54.86	333.41	-2.5924	3.8641e-14	2.2934e-12	gene-G4B84_003688	-
G4B84_006359	5.45	144.53	-4.7658	3.97e-14	2.3453e-12	gene-G4B84_006359	-
G4B84_004887	1.83	94.73	-5.7844	4.0831e-14	2.4009e-12	gene-G4B84_004887	-
G4B84_005238	692.56	4484.94	-2.6964	4.5158e-14	2.643e-12	gene-G4B84_005238	-
G4B84_006645	4982.44	32840.4	-2.7206	4.7636e-14	2.7752e-12	gene-G4B84_006645	-
G4B84_011810	16.28	226.9	-3.8143	5.0527e-14	2.9301e-12	gene-G4B84_011810	-
Novel.938	20.76	157.32	-2.9081	5.0971e-14	2.9424e-12	-	-
G4B84_004837	164.23	21.71	2.9397	5.7103e-14	3.2814e-12	gene-G4B84_004837	-
G4B84_006006	214.56	1741.75	-3.0245	5.8209e-14	3.3298e-12	gene-G4B84_006006	-
G4B84_006638	6.49	86.57	-3.7404	6.1694e-14	3.4974e-12	gene-G4B84_006638	-
G4B84_001965	11.3	133.76	-3.5489	6.7918e-14	3.8331e-12	gene-G4B84_001965	-
G4B84_009661	366.65	3062.48	-3.0637	7.1516e-14	4.0182e-12	gene-G4B84_009661	-
G4B84_002690	119.92	11.42	3.4222	7.2473e-14	4.0361e-12	gene-G4B84_002690	-
Novel.7590	106.47	834.85	-2.9782	7.2382e-14	4.0361e-12	-	-
G4B84_003920	62.71	394.77	-2.6617	7.9779e-14	4.4235e-12	gene-G4B84_003920	-
G4B84_012264	77.52	457.77	-2.5671	8.3179e-14	4.5919e-12	gene-G4B84_012264	-
G4B84_005802	434.53	59.02	2.8943	8.4835e-14	4.663e-12	gene-G4B84_005802	-
G4B84_004255	80.82	600.01	-2.8968	9.8327e-14	5.3812e-12	gene-G4B84_004255	-
G4B84_001599	12.85	137.39	-3.4141	1.0182e-13	5.5485e-12	gene-G4B84_001599	-
Novel.323	1636.31	254.28	2.6877	1.0238e-13	5.5548e-12	-	-
G4B84_011973	7339.92	1743.73	2.074	1.1927e-13	6.4434e-12	gene-G4B84_011973	-
G4B84_003679	361.44	4055.72	-3.489	1.2025e-13	6.4689e-12	gene-G4B84_003679	-
G4B84_010674	1147.05	158.62	2.8465	1.2515e-13	6.7039e-12	gene-G4B84_010674	-
G4B84_004348	14.96	146.29	-3.315	1.3824e-13	7.3737e-12	gene-G4B84_004348	-
G4B84_006250	52.44	328.3	-2.6546	1.5821e-13	8.3684e-12	gene-G4B84_006250	-
G4B84_006926	156.42	777.4	-2.3093	1.6202e-13	8.5343e-12	gene-G4B84_006926	-
G4B84_005881	4.87	97.17	-4.2172	3.4726e-13	1.8216e-11	gene-G4B84_005881	-
G4B84_007671	81.36	478.02	-2.5503	3.7436e-13	1.9556e-11	gene-G4B84_007671	-
G4B84_005660	96.49	529.85	-2.4648	3.9741e-13	2.0675e-11	gene-G4B84_005660	-
G4B84_010595	381.98	3061.7	-3.0052	4.5595e-13	2.3623e-11	gene-G4B84_010595	-
G4B84_004417	32.16	217.05	-2.7587	4.7379e-13	2.4447e-11	gene-G4B84_004417	-
G4B84_004646	146.72	17.76	3.0295	5.8997e-13	3.0319e-11	gene-G4B84_004646	-
G4B84_002812	9.19	104.01	-3.4473	7.9072e-13	4.0471e-11	gene-G4B84_002812	-
G4B84_001183	175.13	816.12	-2.2186	8.0752e-13	4.1164e-11	gene-G4B84_001183	-
G4B84_000858	25.09	288.59	-3.5168	8.581e-13	4.3567e-11	gene-G4B84_000858	-
G4B84_006143	5.64	101.2	-4.2433	8.6548e-13	4.3766e-11	gene-G4B84_006143	-
G4B84_004526	9.19	134.75	-3.8594	8.7374e-13	4.4007e-11	gene-G4B84_004526	-
G4B84_011919	71.01	4.02	4.1777	8.787e-13	4.4081e-11	gene-G4B84_011919	-
G4B84_007666	98.62	479.7	-2.2846	1.1647e-12	5.8199e-11	gene-G4B84_007666	-
Novel.4948	43.33	317.86	-2.888	1.2109e-12	6.0271e-11	-	-
G4B84_001293	12.5	104.12	-3.056	1.4025e-12	6.9529e-11	gene-G4B84_001293	-
G4B84_007916	446.18	83.44	2.4161	1.6067e-12	7.9344e-11	gene-G4B84_007916	-
G4B84_003483	767.74	174	2.1469	1.8171e-12	8.9385e-11	gene-G4B84_003483	-
G4B84_006451	613.94	2293.58	-1.9007	2.1354e-12	1.0464e-10	gene-G4B84_006451	-
G4B84_000474	565.73	2652.05	-2.2276	2.2405e-12	1.0936e-10	gene-G4B84_000474	-
G4B84_004652	2273.48	9659.04	-2.0868	2.5038e-12	1.2174e-10	gene-G4B84_004652	-
G4B84_010001	66.48	1.84	5.2169	2.5421e-12	1.2313e-10	gene-G4B84_010001	-
G4B84_005752	1197.57	307.78	1.9589	2.569e-12	1.2349e-10	gene-G4B84_005752	-
G4B84_007520	320.25	46.98	2.7658	2.5631e-12	1.2349e-10	gene-G4B84_007520	-
G4B84_005720	79.74	832.95	-3.3892	2.5943e-12	1.2423e-10	gene-G4B84_005720	-
G4B84_008674	188.86	836.25	-2.1452	2.7245e-12	1.2998e-10	gene-G4B84_008674	-
G4B84_007703	277.99	63.29	2.1266	3.1201e-12	1.4829e-10	gene-G4B84_007703	-
G4B84_009998	1545.89	295.59	2.3883	3.2863e-12	1.556e-10	gene-G4B84_009998	-
G4B84_002586	2483.22	184.4	3.7446	3.3767e-12	1.5928e-10	gene-G4B84_002586	-
G4B84_004129	108.75	14.1	2.9917	3.3958e-12	1.5959e-10	gene-G4B84_004129	-
G4B84_006547	448.12	78.65	2.5202	3.6349e-12	1.7019e-10	gene-G4B84_006547	-
G4B84_001634	22.31	146.32	-2.7348	3.6844e-12	1.7187e-10	gene-G4B84_001634	-
G4B84_005790	108.41	0.79	7.485	5.1128e-12	2.3763e-10	gene-G4B84_005790	-
G4B84_004053	241.74	10.29	4.5288	5.1328e-12	2.3769e-10	gene-G4B84_004053	-
G4B84_003460	562.03	3542.21	-2.6573	6.0575e-12	2.7948e-10	gene-G4B84_003460	-
G4B84_006134	39.06	330.46	-3.0812	6.3563e-12	2.9221e-10	gene-G4B84_006134	-
G4B84_007334	468.3	92.32	2.3393	7e-12	3.2063e-10	gene-G4B84_007334	-
G4B84_009237	2703.8	327.91	3.0424	7.5701e-12	3.4549e-10	gene-G4B84_009237	-
G4B84_005805	5116.4	948.03	2.4319	7.7655e-12	3.5313e-10	gene-G4B84_005805	-
G4B84_011545	276.67	30.61	3.1439	8.2043e-12	3.7175e-10	gene-G4B84_011545	-
Novel.1561	24213.9	4403.38	2.4594	8.3621e-12	3.7755e-10	-	-
G4B84_003635	10.4	115.5	-3.4493	8.5107e-12	3.8289e-10	gene-G4B84_003635	-
G4B84_003651	671.66	2519.35	-1.9071	8.6058e-12	3.858e-10	gene-G4B84_003651	-
G4B84_001561	16.06	230.75	-3.8917	8.7248e-12	3.8838e-10	gene-G4B84_001561	-
G4B84_003081	10.57	144.98	-3.8074	8.71e-12	3.8838e-10	gene-G4B84_003081	-
G4B84_008055	1539.55	282.89	2.4475	9.1193e-12	4.0451e-10	gene-G4B84_008055	-
G4B84_007027	162.89	1224.56	-2.9137	9.1679e-12	4.0525e-10	gene-G4B84_007027	-
G4B84_010811	14.43	135.94	-3.2692	9.5937e-12	4.2259e-10	gene-G4B84_010811	-
G4B84_001216	92.41	421.63	-2.1865	9.9909e-12	4.3856e-10	gene-G4B84_001216	-
G4B84_011054	229.31	875.75	-1.9332	1.0178e-11	4.4522e-10	gene-G4B84_011054	-
G4B84_003974	654.81	6939.18	-3.4069	1.0742e-11	4.6826e-10	gene-G4B84_003974	-
G4B84_001031	63.76	265.03	-2.0545	1.1755e-11	5.1066e-10	gene-G4B84_001031	-
G4B84_001042	67.03	426.24	-2.6722	1.1942e-11	5.1702e-10	gene-G4B84_001042	-
G4B84_000702	17.86	121.25	-2.7449	1.2452e-11	5.3726e-10	gene-G4B84_000702	-
G4B84_003202	7.69	78.91	-3.3461	1.3475e-11	5.7942e-10	gene-G4B84_003202	-
G4B84_010718	1456.75	15176.1	-3.3816	1.4213e-11	6.0907e-10	gene-G4B84_010718	-
G4B84_003083	266.61	3675.27	-3.7865	1.4415e-11	6.1566e-10	gene-G4B84_003083	-
G4B84_007150	124.9	678.41	-2.442	1.4465e-11	6.1571e-10	gene-G4B84_007150	-
G4B84_006130	225.89	40.66	2.4805	1.8163e-11	7.7054e-10	gene-G4B84_006130	-
G4B84_000602	46.15	239.13	-2.3658	1.939e-11	8.1982e-10	gene-G4B84_000602	-
G4B84_005822	85.25	667.71	-2.9758	1.9567e-11	8.2457e-10	gene-G4B84_005822	-
G4B84_004315	151.4	858.42	-2.5078	2.0579e-11	8.6433e-10	gene-G4B84_004315	-
G4B84_007539	523.61	76.66	2.7841	2.0717e-11	8.6721e-10	gene-G4B84_007539	-
Novel.3060	22.12	201.97	-3.166	2.0981e-11	8.754e-10	-	-
G4B84_000592	677.02	2399.44	-1.8242	2.3164e-11	9.6327e-10	gene-G4B84_000592	-
G4B84_009683	422.74	1611.53	-1.9289	2.399e-11	9.9435e-10	gene-G4B84_009683	-
G4B84_003117	2912.81	13762.4	-2.2405	2.4375e-11	1.007e-09	gene-G4B84_003117	-
G4B84_004039	314.28	22.76	3.7995	2.6796e-11	1.1034e-09	gene-G4B84_004039	-
G4B84_000489	58.02	286.55	-2.3112	2.6913e-11	1.1046e-09	gene-G4B84_000489	-
G4B84_002319	107.1	12.97	3.0766	2.7014e-11	1.1052e-09	gene-G4B84_002319	-
G4B84_011125	568.5	2423.14	-2.0921	2.7413e-11	1.1179e-09	gene-G4B84_011125	-
G4B84_005268	1662.49	533.85	1.6399	2.9703e-11	1.2074e-09	gene-G4B84_005268	-
G4B84_002549	2513.91	464.41	2.4362	2.9996e-11	1.2154e-09	gene-G4B84_002549	-
G4B84_004699	1303.8	397.44	1.714	3.1157e-11	1.2584e-09	gene-G4B84_004699	-
G4B84_002787	9584.65	3125.27	1.6165	3.2966e-11	1.3273e-09	gene-G4B84_002787	-
G4B84_007504	2072.73	604.47	1.7786	3.6875e-11	1.4799e-09	gene-G4B84_007504	-
G4B84_011487	234.76	1173.97	-2.3246	3.7296e-11	1.4921e-09	gene-G4B84_011487	-
G4B84_004095	312.42	1762.68	-2.4966	3.792e-11	1.5123e-09	gene-G4B84_004095	-
G4B84_000074	1117.72	163.52	2.7793	4.0713e-11	1.6186e-09	gene-G4B84_000074	-
G4B84_004709	5.2	73.02	-3.8834	4.2813e-11	1.6967e-09	gene-G4B84_004709	-
Novel.8770	70.55	7.61	3.2357	4.4878e-11	1.773e-09	-	-
G4B84_012056	1578.21	414.46	1.9282	4.6106e-11	1.8158e-09	gene-G4B84_012056	-
G4B84_005799	72.22	0	8.7111	4.7131e-11	1.8504e-09	gene-G4B84_005799	-
G4B84_005907	102.85	16.47	2.6422	5.0574e-11	1.9733e-09	gene-G4B84_005907	-
G4B84_009193	29.95	164.01	-2.4569	5.0479e-11	1.9733e-09	gene-G4B84_009193	-
G4B84_004678	152.82	21.38	2.885	5.0938e-11	1.9814e-09	gene-G4B84_004678	-
G4B84_008789	72.07	430.76	-2.5848	5.5697e-11	2.1599e-09	gene-G4B84_008789	-
G4B84_004428	3161.75	572.48	2.466	5.6594e-11	2.188e-09	gene-G4B84_004428	-
G4B84_005797	115.04	0.79	7.5418	5.813e-11	2.2405e-09	gene-G4B84_005797	-
G4B84_004903	867.54	221.01	1.9723	5.8651e-11	2.2537e-09	gene-G4B84_004903	-
G4B84_004099	2437.95	10895.9	-2.1597	6.2661e-11	2.4005e-09	gene-G4B84_004099	-
G4B84_000047	9.26	86.09	-3.2468	6.462e-11	2.4681e-09	gene-G4B84_000047	-
G4B84_008793	13.8	118.38	-3.1444	6.4945e-11	2.473e-09	gene-G4B84_008793	-
G4B84_001153	523.8	123.95	2.0862	6.5432e-11	2.4841e-09	gene-G4B84_001153	-
G4B84_006228	116.92	616.48	-2.4027	7.3491e-11	2.7734e-09	gene-G4B84_006228	-
G4B84_011944	691.51	185.06	1.9038	7.3439e-11	2.7734e-09	gene-G4B84_011944	-
G4B84_009271	253.85	950.42	-1.9034	7.4732e-11	2.8118e-09	gene-G4B84_009271	-
Novel.2390	20.4	131.58	-2.6962	7.5398e-11	2.8284e-09	-	-
G4B84_003979	276.24	1892.07	-2.7743	7.607e-11	2.8452e-09	gene-G4B84_003979	-
G4B84_004096	20333.8	106191	-2.3847	8.444e-11	3.149e-09	gene-G4B84_004096	-
G4B84_003906	1014.22	5835.43	-2.5248	8.6327e-11	3.2099e-09	gene-G4B84_003906	-
G4B84_011806	75.93	393.06	-2.3785	9.7668e-11	3.6209e-09	gene-G4B84_011806	-
G4B84_009155	771.79	233.55	1.7232	9.9611e-11	3.6821e-09	gene-G4B84_009155	-
G4B84_011788	233.49	1096.64	-2.2359	1.0374e-10	3.8237e-09	gene-G4B84_011788	-
G4B84_000364	124.65	709.05	-2.5081	1.0601e-10	3.8959e-09	gene-G4B84_000364	-
G4B84_007718	13.25	99.25	-2.9254	1.1244e-10	4.1134e-09	gene-G4B84_007718	-
G4B84_009976	475.64	108.31	2.1384	1.1258e-10	4.1134e-09	gene-G4B84_009976	-
G4B84_007517	228.75	49.12	2.2126	1.163e-10	4.2372e-09	gene-G4B84_007517	-
G4B84_004135	1072.96	341.53	1.6528	1.1806e-10	4.2887e-09	gene-G4B84_004135	-
G4B84_005998	4113.3	17479.1	-2.0871	1.2373e-10	4.469e-09	gene-G4B84_005998	-
G4B84_006914	289.68	1569.19	-2.4407	1.237e-10	4.469e-09	gene-G4B84_006914	-
G4B84_011050	117.98	445.74	-1.919	1.269e-10	4.5705e-09	gene-G4B84_011050	-
G4B84_003330	1301.12	359.68	1.8558	1.328e-10	4.7696e-09	gene-G4B84_003330	-
G4B84_000161	492.61	2109.82	-2.1002	1.3717e-10	4.9124e-09	gene-G4B84_000161	-
G4B84_009105	6.13	94.78	-3.9767	1.4326e-10	5.116e-09	gene-G4B84_009105	-
G4B84_006927	381.22	1661.08	-2.1224	1.529e-10	5.4451e-09	gene-G4B84_006927	-
G4B84_006628	130.9	1097.89	-3.0729	1.5657e-10	5.5601e-09	gene-G4B84_006628	-
G4B84_004507	28.7	162.61	-2.517	1.6015e-10	5.671e-09	gene-G4B84_004507	-
G4B84_009536	606.51	1948.4	-1.6836	1.6577e-10	5.8537e-09	gene-G4B84_009536	-
G4B84_000730	530.61	1677.2	-1.6605	1.6763e-10	5.9028e-09	gene-G4B84_000730	-
G4B84_006441	51	270.77	-2.4109	1.7526e-10	6.1545e-09	gene-G4B84_006441	-
G4B84_001893	1022.93	282.64	1.8548	1.7681e-10	6.1919e-09	gene-G4B84_001893	-
G4B84_002774	1623.92	6106.14	-1.9104	1.808e-10	6.3139e-09	gene-G4B84_002774	-
G4B84_003015	6864.25	1493.87	2.1995	1.8242e-10	6.3532e-09	gene-G4B84_003015	-
G4B84_000176	642.96	124.51	2.3681	2.1348e-10	7.4142e-09	gene-G4B84_000176	-
G4B84_010889	28361.5	133981	-2.24	2.1894e-10	7.5832e-09	gene-G4B84_010889	-
Novel.6551	401.74	2438.44	-2.6032	2.2068e-10	7.6225e-09	-	-
G4B84_004474	1097.03	291.09	1.9117	2.506e-10	8.6324e-09	gene-G4B84_004474	-
G4B84_007043	477.66	32.2	3.8779	2.7062e-10	9.2716e-09	gene-G4B84_007043	-
G4B84_011837	10.92	125.5	-3.5884	2.7052e-10	9.2716e-09	gene-G4B84_011837	-
G4B84_003853	85.38	336.99	-1.9832	2.7593e-10	9.4278e-09	gene-G4B84_003853	-
G4B84_010172	20.18	134.25	-2.7354	2.769e-10	9.4354e-09	gene-G4B84_010172	-
G4B84_004134	524.85	135.82	1.9512	2.8258e-10	9.6033e-09	gene-G4B84_004134	-
G4B84_007847	51.99	311.78	-2.5888	2.9875e-10	1.0098e-08	gene-G4B84_007847	-
G4B84_012230	238.42	1349.49	-2.4986	2.9816e-10	1.0098e-08	gene-G4B84_012230	-
G4B84_006251	411.86	1325.88	-1.6864	3.2562e-10	1.0977e-08	gene-G4B84_006251	-
G4B84_001591	32.2	195.72	-2.6064	3.6743e-10	1.2354e-08	gene-G4B84_001591	-
G4B84_010869	3482.03	1088.69	1.6776	3.8378e-10	1.2869e-08	gene-G4B84_010869	-
G4B84_001779	93.05	7.23	3.682	3.9728e-10	1.3283e-08	gene-G4B84_001779	-
G4B84_008008	2.76	52.18	-4.2586	3.9822e-10	1.3283e-08	gene-G4B84_008008	-
G4B84_012116	188.63	25.09	2.8724	4.0623e-10	1.3515e-08	gene-G4B84_012116	-
G4B84_010876	125.27	449.8	-1.8448	4.262e-10	1.4142e-08	gene-G4B84_010876	-
G4B84_003205	12760.6	103864	-3.0249	4.5309e-10	1.4985e-08	gene-G4B84_003205	-
G4B84_006887	332.03	1295.15	-1.9646	4.54e-10	1.4985e-08	gene-G4B84_006887	-
Novel.1297	11.84	103.03	-3.0732	4.6247e-10	1.5226e-08	-	-
G4B84_004364	1177.98	331.29	1.8344	5.0354e-10	1.6516e-08	gene-G4B84_004364	-
G4B84_009204	22.43	126.58	-2.4782	5.0429e-10	1.6516e-08	gene-G4B84_009204	-
G4B84_004085	11298.1	83131.3	-2.8792	5.5126e-10	1.8008e-08	gene-G4B84_004085	-
G4B84_005788	494.09	64.99	2.917	5.7932e-10	1.8876e-08	gene-G4B84_005788	-
G4B84_006186	373.88	2382.26	-2.6697	5.9428e-10	1.9313e-08	gene-G4B84_006186	-
G4B84_002050	41.92	255.68	-2.6136	6.2604e-10	2.0293e-08	gene-G4B84_002050	-
Novel.8870	135.02	21.66	2.6276	6.3528e-10	2.054e-08	-	-
G4B84_010590	711.45	2922.38	-2.0392	7.0568e-10	2.2758e-08	gene-G4B84_010590	-
G4B84_007848	312.43	70.35	2.1501	7.1887e-10	2.3125e-08	gene-G4B84_007848	-
G4B84_000796	1934.69	7312.76	-1.9186	7.5299e-10	2.4161e-08	gene-G4B84_000796	-
G4B84_001122	594.72	41.42	3.8551	8.3417e-10	2.6698e-08	gene-G4B84_001122	-
G4B84_004061	10.12	87.17	-3.0872	8.5027e-10	2.7075e-08	gene-G4B84_004061	-
G4B84_009729	1957.32	7970.59	-2.0259	8.5239e-10	2.7075e-08	gene-G4B84_009729	-
G4B84_010591	447.45	1539.79	-1.7842	8.5234e-10	2.7075e-08	gene-G4B84_010591	-
G4B84_007665	38.77	206.58	-2.3985	8.8401e-10	2.8009e-08	gene-G4B84_007665	-
G4B84_004812	766.98	3470.15	-2.1784	8.9167e-10	2.8181e-08	gene-G4B84_004812	-
G4B84_010689	19.74	151.55	-2.9829	9.123e-10	2.8761e-08	gene-G4B84_010689	-
G4B84_005101	870.52	105.25	3.0488	9.1853e-10	2.8886e-08	gene-G4B84_005101	-
G4B84_007081	23.83	133.64	-2.4744	9.9782e-10	3.1224e-08	gene-G4B84_007081	-
G4B84_004724	886.59	5089.75	-2.5221	1.0837e-09	3.3826e-08	gene-G4B84_004724	-
G4B84_000214	922.58	210.41	2.1343	1.1037e-09	3.4365e-08	gene-G4B84_000214	-
G4B84_000991	4724.77	1489.44	1.6661	1.1299e-09	3.5098e-08	gene-G4B84_000991	-
G4B84_007828	181.23	1140.99	-2.6566	1.1666e-09	3.6146e-08	gene-G4B84_007828	-
G4B84_010277	7.6	85.06	-3.4053	1.1897e-09	3.6773e-08	gene-G4B84_010277	-
G4B84_000499	77.12	624.84	-3.0294	1.2324e-09	3.7999e-08	gene-G4B84_000499	-
G4B84_000930	1587.39	9734.83	-2.6164	1.2863e-09	3.9469e-08	gene-G4B84_000930	-
G4B84_008766	207.26	44.17	2.223	1.2862e-09	3.9469e-08	gene-G4B84_008766	-
G4B84_001538	271.59	69.25	1.9614	1.2994e-09	3.9775e-08	gene-G4B84_001538	-
G4B84_005794	91.74	0.41	7.3379	1.344e-09	4.1041e-08	gene-G4B84_005794	-
G4B84_002494	1021.57	221.71	2.1993	1.3683e-09	4.1682e-08	gene-G4B84_002494	-
G4B84_001177	51.66	355.9	-2.7728	1.408e-09	4.2787e-08	gene-G4B84_001177	-
G4B84_001583	32.93	240.29	-2.8504	1.431e-09	4.3383e-08	gene-G4B84_001583	-
G4B84_011501	1.6	56.69	-5.3337	1.4679e-09	4.4396e-08	gene-G4B84_011501	-
G4B84_000876	730.24	224.34	1.7008	1.4819e-09	4.4712e-08	gene-G4B84_000876	-
G4B84_009170	16990.9	3618.55	2.2314	1.4867e-09	4.4749e-08	gene-G4B84_009170	-
G4B84_003770	18.26	100.49	-2.4594	1.522e-09	4.5704e-08	gene-G4B84_003770	-
G4B84_004423	147.73	729.85	-2.309	1.594e-09	4.7751e-08	gene-G4B84_004423	-
G4B84_000729	184.86	608.89	-1.7168	1.6415e-09	4.906e-08	gene-G4B84_000729	-
G4B84_010124	157.61	23.34	2.7832	1.658e-09	4.9436e-08	gene-G4B84_010124	-
G4B84_002449	16.76	102.15	-2.6413	1.7245e-09	5.1297e-08	gene-G4B84_002449	-
G4B84_004745	35411.8	172543	-2.2847	1.7883e-09	5.3071e-08	gene-G4B84_004745	-
G4B84_008857	41.46	176.55	-2.0906	1.8637e-09	5.5177e-08	gene-G4B84_008857	-
G4B84_011358	28.29	158.15	-2.4714	2.0008e-09	5.9099e-08	gene-G4B84_011358	-
G4B84_009174	247.59	827.64	-1.7437	2.1201e-09	6.2477e-08	gene-G4B84_009174	-
G4B84_010919	841.44	107.3	2.9652	2.301e-09	6.7649e-08	gene-G4B84_010919	-
G4B84_000108	5.36	78.33	-3.7811	2.333e-09	6.8432e-08	gene-G4B84_000108	-
G4B84_009765	2135.85	616.84	1.7936	2.4733e-09	7.2377e-08	gene-G4B84_009765	-
G4B84_000044	195.69	11.8	4.0562	2.4802e-09	7.2414e-08	gene-G4B84_000044	-
G4B84_008661	3.54	55.06	-3.8281	2.5155e-09	7.3275e-08	gene-G4B84_008661	-
G4B84_003524	3616.81	1020.36	1.8262	2.7201e-09	7.9051e-08	gene-G4B84_003524	-
G4B84_000490	160.3	725.14	-2.1781	2.7908e-09	8.0921e-08	gene-G4B84_000490	-
G4B84_010644	267.6	839.43	-1.6496	2.8103e-09	8.13e-08	gene-G4B84_010644	-
G4B84_009015	137.03	26.62	2.3449	2.8349e-09	8.1823e-08	gene-G4B84_009015	-
G4B84_005001	38.82	209.71	-2.4267	3.0596e-09	8.811e-08	gene-G4B84_005001	-
G4B84_000865	9.93	79.07	-2.9611	3.1278e-09	8.9868e-08	gene-G4B84_000865	-
G4B84_010597	294.11	74.33	1.9928	3.1395e-09	8.9999e-08	gene-G4B84_010597	-
G4B84_008779	17.1	138.52	-2.9921	3.1618e-09	9.0434e-08	gene-G4B84_008779	-
G4B84_001858	113.34	553	-2.2908	3.2215e-09	9.1934e-08	gene-G4B84_001858	-
G4B84_006295	82.12	298.25	-1.8616	3.3323e-09	9.4879e-08	gene-G4B84_006295	-
G4B84_000746	2681.68	778.69	1.7837	3.4195e-09	9.7145e-08	gene-G4B84_000746	-
G4B84_010182	299.84	39	2.9406	3.5785e-09	1.0143e-07	gene-G4B84_010182	-
G4B84_010281	725.63	239.63	1.5991	3.6472e-09	1.0315e-07	gene-G4B84_010281	-
G4B84_007476	439.64	63.77	2.7803	3.6678e-09	1.035e-07	gene-G4B84_007476	-
G4B84_004963	13368.8	4101.44	1.7048	3.9677e-09	1.1172e-07	gene-G4B84_004963	-
G4B84_002584	86.74	13.04	2.6921	4.0905e-09	1.1472e-07	gene-G4B84_002584	-
G4B84_004539	2578.21	575.16	2.1666	4.0928e-09	1.1472e-07	gene-G4B84_004539	-
G4B84_003870	40.79	243.11	-2.5875	4.1789e-09	1.1688e-07	gene-G4B84_003870	-
G4B84_004104	135.11	30.87	2.1185	4.3909e-09	1.2254e-07	gene-G4B84_004104	-
G4B84_008768	106.88	16.36	2.6876	4.4374e-09	1.2356e-07	gene-G4B84_008768	-
G4B84_004087	488.42	1700.38	-1.7999	4.4557e-09	1.238e-07	gene-G4B84_004087	-
G4B84_004293	865.58	3929.86	-2.1834	4.5422e-09	1.2593e-07	gene-G4B84_004293	-
G4B84_000704	753.16	247.05	1.6066	4.7147e-09	1.3042e-07	gene-G4B84_000704	-
G4B84_009148	14284.5	4217.14	1.7601	4.7263e-09	1.3046e-07	gene-G4B84_009148	-
G4B84_010620	71.66	10.96	2.7199	4.8044e-09	1.3232e-07	gene-G4B84_010620	-
G4B84_003481	948.58	278.37	1.7718	4.8349e-09	1.3288e-07	gene-G4B84_003481	-
Novel.2765	45	227.22	-2.3314	4.959e-09	1.3599e-07	-	-
G4B84_000982	47.91	204.53	-2.0865	5.0623e-09	1.3852e-07	gene-G4B84_000982	-
G4B84_003430	21.53	108.22	-2.3313	5.2175e-09	1.4228e-07	gene-G4B84_003430	-
G4B84_008331	46.22	222.31	-2.2531	5.222e-09	1.4228e-07	gene-G4B84_008331	-
G4B84_003667	56.88	282.24	-2.3225	6.0086e-09	1.6336e-07	gene-G4B84_003667	-
Novel.2651	1299.01	379.53	1.7767	6.4466e-09	1.7489e-07	-	-
G4B84_011768	94.89	12.74	2.87	6.4858e-09	1.7558e-07	gene-G4B84_011768	-
G4B84_005804	5275.32	1299.23	2.0214	6.7334e-09	1.8189e-07	gene-G4B84_005804	-
G4B84_005005	149.14	920.16	-2.6288	6.8672e-09	1.8511e-07	gene-G4B84_005005	-
G4B84_002970	5607.21	1906.7	1.5569	7.0883e-09	1.9052e-07	gene-G4B84_002970	-
G4B84_009411	199.51	1111.34	-2.4814	7.0982e-09	1.9052e-07	gene-G4B84_009411	-
G4B84_010740	116.5	468.72	-2.0111	7.2924e-09	1.9532e-07	gene-G4B84_010740	-
G4B84_002284	533.01	56.56	3.2368	7.5958e-09	2.0302e-07	gene-G4B84_002284	-
G4B84_003365	57.11	243.21	-2.0884	7.616e-09	2.0313e-07	gene-G4B84_003365	-
G4B84_005638	196.74	692.84	-1.8213	7.8158e-09	2.0716e-07	gene-G4B84_005638	-
G4B84_005739	627.73	170.5	1.8831	7.8032e-09	2.0716e-07	gene-G4B84_005739	-
G4B84_006489	415.49	1912.37	-2.2024	7.8163e-09	2.0716e-07	gene-G4B84_006489	-
G4B84_006545	316.26	1564.94	-2.3058	8.1192e-09	2.1473e-07	gene-G4B84_006545	-
G4B84_010215	170.58	26.68	2.6543	8.2269e-09	2.1713e-07	gene-G4B84_010215	-
G4B84_007020	988.51	4139.33	-2.0667	8.3432e-09	2.1974e-07	gene-G4B84_007020	-
G4B84_008022	1.92	44.36	-4.4634	8.493e-09	2.2322e-07	gene-G4B84_008022	-
G4B84_002975	81.52	513.19	-2.653	8.5831e-09	2.2468e-07	gene-G4B84_002975	-
G4B84_004256	8.14	88.25	-3.4432	8.584e-09	2.2468e-07	gene-G4B84_004256	-
G4B84_011362	3.81	63.67	-3.9346	8.783e-09	2.2941e-07	gene-G4B84_011362	-
G4B84_012151	912.81	269.85	1.7621	8.9185e-09	2.3247e-07	gene-G4B84_012151	-
G4B84_004533	44.82	312.12	-2.7969	9.1255e-09	2.3738e-07	gene-G4B84_004533	-
G4B84_011915	49.71	224.11	-2.1803	9.8629e-09	2.5603e-07	gene-G4B84_011915	-
G4B84_011598	1.5	51.81	-5.2011	9.892e-09	2.5626e-07	gene-G4B84_011598	-
G4B84_007383	21.02	111.17	-2.4078	1.07e-08	2.7606e-07	gene-G4B84_007383	-
G4B84_002239	18.13	140.77	-2.9753	1.0734e-08	2.7637e-07	gene-G4B84_002239	-
G4B84_012041	66.72	322.73	-2.2792	1.1246e-08	2.8895e-07	gene-G4B84_012041	-
G4B84_011384	46.43	261.42	-2.4889	1.1272e-08	2.8905e-07	gene-G4B84_011384	-
G4B84_008673	101.88	457.77	-2.1581	1.1453e-08	2.931e-07	gene-G4B84_008673	-
G4B84_005596	1067.51	287.64	1.8929	1.1559e-08	2.9522e-07	gene-G4B84_005596	-
Novel.2579	319.58	1250.12	-1.9662	1.1711e-08	2.985e-07	-	-
G4B84_011146	339.29	1428.03	-2.0759	1.2011e-08	3.0551e-07	gene-G4B84_011146	-
G4B84_005793	37.25	0	7.7542	1.2164e-08	3.088e-07	gene-G4B84_005793	-
G4B84_008373	68.95	7.49	3.1631	1.2338e-08	3.1258e-07	gene-G4B84_008373	-
G4B84_009121	9.31	64.8	-2.7863	1.239e-08	3.1328e-07	gene-G4B84_009121	-
G4B84_007514	3.83	54.06	-3.8531	1.2568e-08	3.1714e-07	gene-G4B84_007514	-
G4B84_005470	4.26	50.33	-3.5981	1.2863e-08	3.2394e-07	gene-G4B84_005470	-
G4B84_007356	178.01	901.77	-2.3457	1.3167e-08	3.3094e-07	gene-G4B84_007356	-
G4B84_011716	527.47	2258.88	-2.1	1.3422e-08	3.3666e-07	gene-G4B84_011716	-
G4B84_009726	394.75	35.85	3.472	1.3625e-08	3.4108e-07	gene-G4B84_009726	-
G4B84_006087	9.23	68.52	-2.9	1.3931e-08	3.4805e-07	gene-G4B84_006087	-
Novel.2340	134.52	489.71	-1.8585	1.3994e-08	3.4895e-07	-	-
G4B84_009352	1323.02	5375.67	-2.0228	1.4114e-08	3.5125e-07	gene-G4B84_009352	-
G4B84_012062	179.9	38.13	2.2343	1.4423e-08	3.5822e-07	gene-G4B84_012062	-
G4B84_003986	127.09	20.18	2.6131	1.4546e-08	3.6057e-07	gene-G4B84_003986	-
G4B84_001964	408.5	119.05	1.7889	1.4986e-08	3.7076e-07	gene-G4B84_001964	-
G4B84_004352	1.43	44.67	-5.0286	1.5273e-08	3.7648e-07	gene-G4B84_004352	-
G4B84_006989	3916.59	22894.5	-2.5471	1.5277e-08	3.7648e-07	gene-G4B84_006989	-
G4B84_000722	102923	26429.8	1.9614	1.5327e-08	3.7698e-07	gene-G4B84_000722	-
G4B84_007194	57.02	223.85	-1.9842	1.5621e-08	3.8346e-07	gene-G4B84_007194	-
G4B84_012152	310.7	84.06	1.8983	1.5867e-08	3.8875e-07	gene-G4B84_012152	-
G4B84_006338	1241.92	5880.89	-2.2439	1.6063e-08	3.9278e-07	gene-G4B84_006338	-
G4B84_001496	233.16	698.43	-1.5829	1.6167e-08	3.9456e-07	gene-G4B84_001496	-
G4B84_007168	1304.34	4844.71	-1.8931	1.6934e-08	4.1248e-07	gene-G4B84_007168	-
G4B84_004537	493.89	106.43	2.219	1.9236e-08	4.6766e-07	gene-G4B84_004537	-
G4B84_010015	227.51	46.65	2.2997	1.9304e-08	4.6841e-07	gene-G4B84_010015	-
G4B84_006187	8.15	91.03	-3.4432	2.0453e-08	4.9534e-07	gene-G4B84_006187	-
G4B84_012066	53.47	2.63	4.2228	2.1581e-08	5.2165e-07	gene-G4B84_012066	-
G4B84_008311	3165.18	9737.92	-1.6213	2.1634e-08	5.2193e-07	gene-G4B84_008311	-
G4B84_004834	368.16	1450.26	-1.9781	2.254e-08	5.4276e-07	gene-G4B84_004834	-
G4B84_003157	37.16	165.51	-2.1617	2.4189e-08	5.8136e-07	gene-G4B84_003157	-
Novel.3008	261.6	864.97	-1.7264	2.5316e-08	6.073e-07	-	-
G4B84_005800	30.65	0	7.4823	2.5367e-08	6.0736e-07	gene-G4B84_005800	-
G4B84_004687	7.45	54.42	-2.8676	2.6739e-08	6.3901e-07	gene-G4B84_004687	-
G4B84_002853	77812	27195.5	1.5167	2.7027e-08	6.4466e-07	gene-G4B84_002853	-
G4B84_010409	21.6	151.97	-2.7787	2.7532e-08	6.5548e-07	gene-G4B84_010409	-
G4B84_006495	3.35	48.54	-3.754	2.771e-08	6.5847e-07	gene-G4B84_006495	-
G4B84_005774	84.27	297.23	-1.8213	2.7905e-08	6.6188e-07	gene-G4B84_005774	-
G4B84_005421	1374.34	4469.87	-1.7008	2.8382e-08	6.7192e-07	gene-G4B84_005421	-
G4B84_007101	323.83	1014.39	-1.6482	2.8874e-08	6.8229e-07	gene-G4B84_007101	-
Novel.7939	71.48	265.84	-1.8997	2.9521e-08	6.9627e-07	-	-
G4B84_001189	28.27	124.76	-2.141	2.9882e-08	7.0347e-07	gene-G4B84_001189	-
G4B84_008675	2067.48	7420.39	-1.844	3.0705e-08	7.2151e-07	gene-G4B84_008675	-
G4B84_004076	12.81	84.3	-2.7379	3.1196e-08	7.3168e-07	gene-G4B84_004076	-
Novel.4096	48.97	4.98	3.3024	3.3939e-08	7.9456e-07	-	-
G4B84_009162	67.41	301.3	-2.1643	3.4796e-08	8.1311e-07	gene-G4B84_009162	-
G4B84_010954	396.89	110.12	1.8404	3.5252e-08	8.2224e-07	gene-G4B84_010954	-
Novel.3363	0.63	54.62	-6.3282	3.5385e-08	8.2383e-07	-	-
G4B84_002481	246.85	51.9	2.2444	3.6598e-08	8.4915e-07	gene-G4B84_002481	-
G4B84_010655	127.15	25.75	2.3341	3.6607e-08	8.4915e-07	gene-G4B84_010655	-
G4B84_004025	261.16	77.65	1.7536	3.7047e-08	8.577e-07	gene-G4B84_004025	-
G4B84_006508	835.81	3025.29	-1.8563	3.7111e-08	8.577e-07	gene-G4B84_006508	-
G4B84_001413	103.15	497.59	-2.2759	3.9282e-08	9.0621e-07	gene-G4B84_001413	-
G4B84_005787	175.44	33.34	2.3958	3.9584e-08	9.1151e-07	gene-G4B84_005787	-
G4B84_009385	902.31	2840.48	-1.6546	3.9809e-08	9.1504e-07	gene-G4B84_009385	-
G4B84_009310	97.99	346.97	-1.814	4.0602e-08	9.3004e-07	gene-G4B84_009310	-
G4B84_011335	44.67	3.79	3.6935	4.0609e-08	9.3004e-07	gene-G4B84_011335	-
G4B84_008593	551.33	1731.34	-1.6496	4.087e-08	9.3262e-07	gene-G4B84_008593	-
G4B84_000362	1048	86.31	3.6002	4.0992e-08	9.3372e-07	gene-G4B84_000362	-
G4B84_010000	50.37	2.65	4.1633	4.1154e-08	9.3573e-07	gene-G4B84_010000	-
G4B84_002299	148.5	789.97	-2.4168	4.1233e-08	9.3584e-07	gene-G4B84_002299	-
G4B84_006164	4.13	49.67	-3.662	4.204e-08	9.5246e-07	gene-G4B84_006164	-
G4B84_005903	77.67	15.47	2.3479	4.2369e-08	9.5819e-07	gene-G4B84_005903	-
G4B84_011897	9.97	75.82	-2.9526	4.2552e-08	9.6061e-07	gene-G4B84_011897	-
G4B84_008198	309.67	81.16	1.9397	4.4253e-08	9.9724e-07	gene-G4B84_008198	-
G4B84_009981	93.82	18.83	2.2984	4.4388e-08	9.985e-07	gene-G4B84_009981	-
G4B84_010078	3.4	51.93	-4.0329	4.6968e-08	1.0546e-06	gene-G4B84_010078	-
G4B84_009491	71.05	3.27	4.3597	4.7104e-08	1.0558e-06	gene-G4B84_009491	-
G4B84_007076	1.83	39.61	-4.5208	5.0325e-08	1.126e-06	gene-G4B84_007076	-
G4B84_009275	2124.81	681.93	1.6395	5.2389e-08	1.1701e-06	gene-G4B84_009275	-
G4B84_001244	22.06	110.58	-2.3125	5.4809e-08	1.222e-06	gene-G4B84_001244	-
G4B84_001434	60.83	294.68	-2.2617	5.5329e-08	1.2315e-06	gene-G4B84_001434	-
G4B84_002226	23.35	124.29	-2.4018	5.5574e-08	1.2347e-06	gene-G4B84_002226	-
G4B84_011340	919.54	3016.5	-1.7138	5.9484e-08	1.3193e-06	gene-G4B84_011340	-
G4B84_005142	938.94	4934.01	-2.3943	5.9622e-08	1.32e-06	gene-G4B84_005142	-
G4B84_002391	632.16	2283.94	-1.8544	5.9935e-08	1.3223e-06	gene-G4B84_002391	-
G4B84_006286	85140.9	21214.9	2.0048	5.9867e-08	1.3223e-06	gene-G4B84_006286	-
G4B84_001067	1764.88	656.33	1.428	6.1278e-08	1.3496e-06	gene-G4B84_001067	-
G4B84_009181	638.06	1985.12	-1.6374	6.4101e-08	1.4093e-06	gene-G4B84_009181	-
G4B84_000827	858.86	2577.94	-1.5854	6.6446e-08	1.4584e-06	gene-G4B84_000827	-
G4B84_003550	170.15	41.95	2.0082	6.6646e-08	1.4602e-06	gene-G4B84_003550	-
G4B84_004878	322.73	1106.61	-1.7798	6.7868e-08	1.4844e-06	gene-G4B84_004878	-
G4B84_003147	1.59	39.23	-4.5657	6.8e-08	1.4847e-06	gene-G4B84_003147	-
G4B84_001979	109.58	388.28	-1.8271	6.8144e-08	1.4853e-06	gene-G4B84_001979	-
Novel.5691	108.17	327.73	-1.5953	7.1502e-08	1.5558e-06	-	-
G4B84_003439	1139.39	3361.26	-1.5608	7.2736e-08	1.58e-06	gene-G4B84_003439	-
G4B84_012196	102.51	442.37	-2.1126	7.4388e-08	1.6131e-06	gene-G4B84_012196	-
G4B84_007931	354.38	1636.67	-2.209	7.4897e-08	1.6213e-06	gene-G4B84_007931	-
Novel.6789	18.14	96.49	-2.3939	7.7795e-08	1.6812e-06	-	-
G4B84_008865	4.93	46.11	-3.2483	8.0004e-08	1.726e-06	gene-G4B84_008865	-
G4B84_005361	299.41	923.89	-1.6274	8.0713e-08	1.7383e-06	gene-G4B84_005361	-
G4B84_006711	83.93	269.55	-1.688	8.3425e-08	1.7936e-06	gene-G4B84_006711	-
G4B84_005170	421.06	144.48	1.5436	8.4833e-08	1.8208e-06	gene-G4B84_005170	-
G4B84_002647	1559.05	6253.73	-2.0044	8.6565e-08	1.8548e-06	gene-G4B84_002647	-
Novel.7571	84.73	396.91	-2.2371	8.7155e-08	1.8643e-06	-	-
G4B84_012118	761.75	284.42	1.4217	9.4483e-08	2.0177e-06	gene-G4B84_012118	-
G4B84_006272	0.79	42.24	-5.4372	9.9784e-08	2.1273e-06	gene-G4B84_006272	-
G4B84_007702	262.46	78.69	1.7461	1.0139e-07	2.1579e-06	gene-G4B84_007702	-
G4B84_010440	78.19	13.87	2.5145	1.0286e-07	2.1855e-06	gene-G4B84_010440	-
G4B84_010969	77.7	11.92	2.7008	1.0321e-07	2.1891e-06	gene-G4B84_010969	-
G4B84_006109	165.58	534.73	-1.6916	1.0533e-07	2.2305e-06	gene-G4B84_006109	-
G4B84_000487	165.63	36.8	2.1468	1.0633e-07	2.2479e-06	gene-G4B84_000487	-
G4B84_004357	134.1	31.32	2.0744	1.0864e-07	2.2928e-06	gene-G4B84_004357	-
G4B84_005020	10.58	64.11	-2.6196	1.1286e-07	2.3779e-06	gene-G4B84_005020	-
G4B84_000458	71.37	530.26	-2.9016	1.1555e-07	2.4306e-06	gene-G4B84_000458	-
G4B84_009426	245.9	1162.49	-2.2436	1.1948e-07	2.509e-06	gene-G4B84_009426	-
G4B84_010381	61.36	218.8	-1.8358	1.2014e-07	2.5188e-06	gene-G4B84_010381	-
G4B84_000241	13259.7	4744.04	1.4829	1.2158e-07	2.5426e-06	gene-G4B84_000241	-
G4B84_009862	282.8	89.3	1.6542	1.2168e-07	2.5426e-06	gene-G4B84_009862	-
G4B84_000826	129.01	456.8	-1.82	1.2311e-07	2.5683e-06	gene-G4B84_000826	-
Novel.5930	136.85	27.32	2.3125	1.2453e-07	2.5929e-06	-	-
Novel.8200	89.24	13.17	2.7864	1.2587e-07	2.6128e-06	-	-
G4B84_000125	150.18	445.53	-1.5675	1.2756e-07	2.6437e-06	gene-G4B84_000125	-
G4B84_002400	14.29	130.92	-3.1861	1.2848e-07	2.6582e-06	gene-G4B84_002400	-
G4B84_009845	131.76	33.91	1.9336	1.3007e-07	2.6868e-06	gene-G4B84_009845	-
G4B84_000492	31.66	143.71	-2.1909	1.341e-07	2.7626e-06	gene-G4B84_000492	-
G4B84_009241	88.15	401.83	-2.1905	1.3417e-07	2.7626e-06	gene-G4B84_009241	-
G4B84_002951	30.73	209.88	-2.7898	1.3701e-07	2.8118e-06	gene-G4B84_002951	-
G4B84_012077	1.32	43.29	-4.7754	1.3683e-07	2.8118e-06	gene-G4B84_012077	-
G4B84_006005	580.1	2146.97	-1.889	1.3763e-07	2.8199e-06	gene-G4B84_006005	-
G4B84_010875	32.01	136.3	-2.0739	1.3974e-07	2.8587e-06	gene-G4B84_010875	-
G4B84_010069	12.1	87.74	-2.8298	1.4351e-07	2.9309e-06	gene-G4B84_010069	-
G4B84_009742	95.06	21.16	2.1864	1.464e-07	2.9852e-06	gene-G4B84_009742	-
G4B84_001523	19674.7	51210.7	-1.3801	1.528e-07	3.1105e-06	gene-G4B84_001523	-
G4B84_009109	10.41	63.42	-2.5973	1.5351e-07	3.12e-06	gene-G4B84_009109	-
G4B84_002158	435.71	1822.83	-2.066	1.5642e-07	3.1742e-06	gene-G4B84_002158	-
G4B84_001573	47.7	293.98	-2.6039	1.5931e-07	3.2276e-06	gene-G4B84_001573	-
G4B84_003789	306.71	874.84	-1.51	1.6354e-07	3.3079e-06	gene-G4B84_003789	-
G4B84_004951	1262.95	4567.52	-1.8547	1.6467e-07	3.3254e-06	gene-G4B84_004951	-
G4B84_002973	141.56	718.78	-2.3474	1.6602e-07	3.3473e-06	gene-G4B84_002973	-
G4B84_012030	28	107.5	-1.9376	1.6912e-07	3.4046e-06	gene-G4B84_012030	-
G4B84_012034	227.39	725.68	-1.6766	1.6953e-07	3.4074e-06	gene-G4B84_012034	-
G4B84_003200	11.05	69.25	-2.6329	1.7006e-07	3.4126e-06	gene-G4B84_003200	-
G4B84_011745	106.14	10.84	3.1923	1.8345e-07	3.6754e-06	gene-G4B84_011745	-
G4B84_004860	165.31	499	-1.5962	1.8443e-07	3.6892e-06	gene-G4B84_004860	-
G4B84_005737	4.62	47.96	-3.359	1.8505e-07	3.6957e-06	gene-G4B84_005737	-
G4B84_004974	106.87	336.09	-1.6495	1.8767e-07	3.7378e-06	gene-G4B84_004974	-
G4B84_006629	4795.19	2042.45	1.2314	1.8775e-07	3.7378e-06	gene-G4B84_006629	-
G4B84_004626	1299.9	488.93	1.4127	1.8848e-07	3.7465e-06	gene-G4B84_004626	-
G4B84_004149	2.79	38.96	-3.7073	1.918e-07	3.8066e-06	gene-G4B84_004149	-
G4B84_002974	65.52	438.81	-2.741	1.9286e-07	3.8215e-06	gene-G4B84_002974	-
G4B84_001712	132.48	819.92	-2.6352	1.9613e-07	3.8802e-06	gene-G4B84_001712	-
G4B84_010935	6828.02	1705.13	2.0016	1.982e-07	3.915e-06	gene-G4B84_010935	-
G4B84_009744	17.07	81.8	-2.2543	1.9883e-07	3.9214e-06	gene-G4B84_009744	-
G4B84_005742	33.98	226.98	-2.7544	2.0491e-07	4.035e-06	gene-G4B84_005742	-
G4B84_008264	2.96	36.96	-3.6067	2.1149e-07	4.1581e-06	gene-G4B84_008264	-
G4B84_001734	5.46	47.39	-3.1147	2.1221e-07	4.1659e-06	gene-G4B84_001734	-
G4B84_006760	45802.9	16160.1	1.503	2.1375e-07	4.1894e-06	gene-G4B84_006760	-
G4B84_001788	1020.54	271.77	1.9065	2.1454e-07	4.1985e-06	gene-G4B84_001788	-
G4B84_006937	2.13	37.26	-4.1613	2.1755e-07	4.2508e-06	gene-G4B84_006937	-
Novel.1257	50.28	188.76	-1.9124	2.1909e-07	4.2744e-06	-	-
G4B84_004993	6531.04	22407.3	-1.7786	2.2256e-07	4.3353e-06	gene-G4B84_004993	-
Novel.7022	395.56	1358.57	-1.7811	2.2459e-07	4.3682e-06	-	-
G4B84_000086	27.97	128.62	-2.2101	2.2502e-07	4.3698e-06	gene-G4B84_000086	-
G4B84_007278	71.38	399.41	-2.4904	2.2905e-07	4.4411e-06	gene-G4B84_007278	-
G4B84_000066	135.36	23.19	2.5523	2.3126e-07	4.4772e-06	gene-G4B84_000066	-
G4B84_003508	296.79	1256.91	-2.0819	2.3208e-07	4.4862e-06	gene-G4B84_003508	-
G4B84_004088	1283.01	3808	-1.5697	2.4298e-07	4.6897e-06	gene-G4B84_004088	-
G4B84_005345	90.97	367.35	-2.0235	2.4399e-07	4.7021e-06	gene-G4B84_005345	-
G4B84_006917	1423.41	477.68	1.574	2.4475e-07	4.7048e-06	gene-G4B84_006917	-
G4B84_011367	1.59	41.88	-4.6618	2.4488e-07	4.7048e-06	gene-G4B84_011367	-
Novel.3096	197.61	853.79	-2.1067	2.4562e-07	4.712e-06	-	-
G4B84_005875	61.23	0.53	6.6987	2.4882e-07	4.7661e-06	gene-G4B84_005875	-
Novel.2173	1335.94	509.37	1.3907	2.5433e-07	4.8642e-06	-	-
G4B84_008632	739.6	2490.5	-1.7526	2.5981e-07	4.9616e-06	gene-G4B84_008632	-
G4B84_000189	311.89	1045.53	-1.7472	2.6375e-07	5.0292e-06	gene-G4B84_000189	-
G4B84_010151	12.15	73.72	-2.6332	2.6531e-07	5.0513e-06	gene-G4B84_010151	-
G4B84_008638	9.39	77.77	-3.0265	2.6958e-07	5.1249e-06	gene-G4B84_008638	-
G4B84_011920	1590.38	446.1	1.8344	2.7042e-07	5.1332e-06	gene-G4B84_011920	-
G4B84_008343	221.39	51.88	2.0804	2.7326e-07	5.1715e-06	gene-G4B84_008343	-
G4B84_009424	551.21	1943.68	-1.8199	2.7302e-07	5.1715e-06	gene-G4B84_009424	-
G4B84_011917	434.6	37.27	3.5167	2.8063e-07	5.3031e-06	gene-G4B84_011917	-
G4B84_009660	125.54	21.14	2.5426	2.8282e-07	5.3364e-06	gene-G4B84_009660	-
G4B84_008801	75.37	244.84	-1.6969	2.8352e-07	5.3417e-06	gene-G4B84_008801	-
Novel.2147	131.83	470.47	-1.8378	2.9106e-07	5.4755e-06	-	-
G4B84_004090	6.85	58.7	-3.099	2.943e-07	5.5283e-06	gene-G4B84_004090	-
G4B84_004228	577.76	106.03	2.4408	3.0164e-07	5.6495e-06	gene-G4B84_004228	-
G4B84_007622	0.26	36.79	-6.622	3.0128e-07	5.6495e-06	gene-G4B84_007622	-
G4B84_010766	4799.11	1110.64	2.1109	3.0515e-07	5.7067e-06	gene-G4B84_010766	-
G4B84_008639	217.87	703.53	-1.6941	3.158e-07	5.897e-06	gene-G4B84_008639	-
G4B84_003129	379.29	1263.68	-1.7341	3.232e-07	6.0265e-06	gene-G4B84_003129	-
G4B84_002977	191.69	544.97	-1.507	3.2587e-07	6.0601e-06	gene-G4B84_002977	-
G4B84_005081	143.33	426.37	-1.5666	3.2597e-07	6.0601e-06	gene-G4B84_005081	-
G4B84_003976	468.42	1157.38	-1.3044	3.293e-07	6.113e-06	gene-G4B84_003976	-
G4B84_009882	2020.75	453.53	2.155	3.3317e-07	6.1759e-06	gene-G4B84_009882	-
G4B84_000628	2926.2	1036.03	1.4991	3.4476e-07	6.372e-06	gene-G4B84_000628	-
G4B84_007657	177.87	667.01	-1.9113	3.4964e-07	6.4528e-06	gene-G4B84_007657	-
Novel.3371	491.96	124.87	1.9879	3.5414e-07	6.5263e-06	-	-
G4B84_009129	1424.07	544.78	1.3882	3.5932e-07	6.612e-06	gene-G4B84_009129	-
G4B84_003329	301.97	84.12	1.8482	3.5988e-07	6.6127e-06	gene-G4B84_003329	-
G4B84_007728	2803.93	487.6	2.5252	3.6887e-07	6.7682e-06	gene-G4B84_007728	-
G4B84_011767	815.47	198.28	2.0377	3.8636e-07	7.0788e-06	gene-G4B84_011767	-
G4B84_007936	5.25	46.52	-3.1345	3.9872e-07	7.2946e-06	gene-G4B84_007936	-
G4B84_007357	42.74	265.27	-2.6511	3.9943e-07	7.297e-06	gene-G4B84_007357	-
G4B84_003852	71.19	233.1	-1.7105	4.1406e-07	7.5535e-06	gene-G4B84_003852	-
G4B84_006627	355.02	1295.45	-1.8684	4.2073e-07	7.6641e-06	gene-G4B84_006627	-
G4B84_004658	990.27	3514.8	-1.8283	4.2364e-07	7.7061e-06	gene-G4B84_004658	-
G4B84_005188	8.62	53.61	-2.6343	4.2614e-07	7.7404e-06	gene-G4B84_005188	-
Novel.8150	61.82	223.13	-1.8553	4.3157e-07	7.8278e-06	-	-
G4B84_006127	7.7	55.67	-2.8906	4.3376e-07	7.8449e-06	gene-G4B84_006127	-
G4B84_009497	2365.18	868.97	1.4446	4.3324e-07	7.8449e-06	gene-G4B84_009497	-
G4B84_008316	291.5	37.67	2.9566	4.4175e-07	7.9781e-06	gene-G4B84_008316	-
G4B84_009691	684.51	3421.61	-2.3204	4.4511e-07	8.0272e-06	gene-G4B84_009691	-
G4B84_000338	620.14	206.75	1.5906	4.5699e-07	8.2298e-06	gene-G4B84_000338	-
G4B84_003462	4.45	71.86	-3.9852	4.6188e-07	8.306e-06	gene-G4B84_003462	-
G4B84_000111	4635.68	12380.2	-1.4171	4.7297e-07	8.4933e-06	gene-G4B84_000111	-
G4B84_006910	953.36	378.86	1.3313	4.7624e-07	8.54e-06	gene-G4B84_006910	-
G4B84_009399	0.26	35.98	-6.5742	4.7772e-07	8.5544e-06	gene-G4B84_009399	-
Novel.3958	670.28	173.83	1.9499	4.846e-07	8.6653e-06	-	-
G4B84_008191	266.5	739.7	-1.4745	4.8959e-07	8.7421e-06	gene-G4B84_008191	-
G4B84_006457	65.48	191.09	-1.5479	5.0241e-07	8.9583e-06	gene-G4B84_006457	-
G4B84_004568	1519.87	512.88	1.5668	5.0686e-07	9.025e-06	gene-G4B84_004568	-
G4B84_001091	17.2	80.49	-2.2564	5.0843e-07	9.0323e-06	gene-G4B84_001091	-
G4B84_001954	11880	4244.38	1.485	5.087e-07	9.0323e-06	gene-G4B84_001954	-
G4B84_007984	279.3	715.73	-1.3595	5.0944e-07	9.0328e-06	gene-G4B84_007984	-
G4B84_000773	6.59	65.79	-3.3058	5.1486e-07	9.116e-06	gene-G4B84_000773	-
G4B84_005730	60.83	11.89	2.359	5.2378e-07	9.2611e-06	gene-G4B84_005730	-
G4B84_006112	684.03	1788.93	-1.3867	5.246e-07	9.2626e-06	gene-G4B84_006112	-
G4B84_000005	63.55	267.5	-2.0711	5.2623e-07	9.2783e-06	gene-G4B84_000005	-
G4B84_009653	229.02	885.02	-1.9524	5.2835e-07	9.3027e-06	gene-G4B84_009653	-
G4B84_009136	437.63	1185.07	-1.4369	5.5172e-07	9.7008e-06	gene-G4B84_009136	-
G4B84_007487	584.78	101.89	2.5117	5.6966e-07	9.9885e-06	gene-G4B84_007487	-
G4B84_010987	1942.51	600.82	1.6941	5.6959e-07	9.9885e-06	gene-G4B84_010987	-
G4B84_003359	1640.89	633.56	1.3737	5.7818e-07	1.0124e-05	gene-G4B84_003359	-
G4B84_007870	117.46	31.83	1.889	5.9196e-07	1.0351e-05	gene-G4B84_007870	-
G4B84_002462	31.02	160.7	-2.3635	5.9754e-07	1.0434e-05	gene-G4B84_002462	-
G4B84_004330	52.14	0.93	5.5671	6.0039e-07	1.0455e-05	gene-G4B84_004330	-
G4B84_006021	96.34	23.63	2.061	6.0041e-07	1.0455e-05	gene-G4B84_006021	-
G4B84_001730	149.94	507.06	-1.752	6.0173e-07	1.0463e-05	gene-G4B84_001730	-
G4B84_008138	90.79	22.63	1.98	6.025e-07	1.0463e-05	gene-G4B84_008138	-
G4B84_000942	9.14	54.7	-2.5638	6.0389e-07	1.0472e-05	gene-G4B84_000942	-
G4B84_001248	1070.77	3319.06	-1.6327	6.0959e-07	1.0557e-05	gene-G4B84_001248	-
G4B84_006008	22.15	145.25	-2.7452	6.1521e-07	1.0639e-05	gene-G4B84_006008	-
G4B84_010917	6514.37	1369.29	2.2498	6.4452e-07	1.1131e-05	gene-G4B84_010917	-
G4B84_000239	3.2	34.39	-3.4597	6.4547e-07	1.1132e-05	gene-G4B84_000239	-
G4B84_000087	24.54	113.61	-2.2336	6.4979e-07	1.1192e-05	gene-G4B84_000087	-
G4B84_001223	57.82	8.6	2.7185	6.5147e-07	1.1205e-05	gene-G4B84_001223	-
Novel.1822	151.69	44.73	1.7704	6.5624e-07	1.1272e-05	-	-
G4B84_010378	64.23	243.65	-1.9297	6.6099e-07	1.1338e-05	gene-G4B84_010378	-
G4B84_010592	361.81	938.49	-1.3762	6.714e-07	1.1501e-05	gene-G4B84_010592	-
G4B84_005583	158.58	522.27	-1.7195	6.8042e-07	1.164e-05	gene-G4B84_005583	-
G4B84_005442	36.28	139.77	-1.946	6.8611e-07	1.1721e-05	gene-G4B84_005442	-
G4B84_007505	4.23	41.4	-3.2589	6.8886e-07	1.1753e-05	gene-G4B84_007505	-
G4B84_010363	93.52	521.26	-2.486	6.9768e-07	1.1887e-05	gene-G4B84_010363	-
G4B84_003214	924.78	2996.34	-1.6968	7.0937e-07	1.207e-05	gene-G4B84_003214	-
G4B84_000888	348.24	84.46	2.0421	7.1972e-07	1.223e-05	gene-G4B84_000888	-
G4B84_001345	5.59	52.79	-3.2724	7.2595e-07	1.2319e-05	gene-G4B84_001345	-
G4B84_000824	121.08	364.9	-1.5883	7.4579e-07	1.2621e-05	gene-G4B84_000824	-
G4B84_003130	375.99	1330.25	-1.8213	7.4675e-07	1.2621e-05	gene-G4B84_003130	-
G4B84_011945	114821	28580.9	2.0063	7.4667e-07	1.2621e-05	gene-G4B84_011945	-
G4B84_009630	7749.05	1622.51	2.256	7.5464e-07	1.2737e-05	gene-G4B84_009630	-
G4B84_010630	8644.35	1825.73	2.2425	7.5876e-07	1.279e-05	gene-G4B84_010630	-
G4B84_006110	117.32	328.77	-1.4892	7.6465e-07	1.2872e-05	gene-G4B84_006110	-
G4B84_005786	141.21	31.14	2.1615	7.7615e-07	1.3048e-05	gene-G4B84_005786	-
Novel.6620	46.52	216.98	-2.2309	7.7851e-07	1.307e-05	-	-
G4B84_002728	878.14	210.87	2.0555	7.8923e-07	1.3233e-05	gene-G4B84_002728	-
G4B84_004814	1219.83	237.92	2.3581	7.9044e-07	1.3235e-05	gene-G4B84_004814	-
Novel.365	2.67	33.05	-3.7389	8.1136e-07	1.3568e-05	-	-
G4B84_011585	274.74	72.02	1.9443	8.1611e-07	1.3629e-05	gene-G4B84_011585	-
G4B84_007026	209.92	659.38	-1.652	8.4019e-07	1.4013e-05	gene-G4B84_007026	-
G4B84_001192	136.47	14.32	3.2229	8.414e-07	1.4015e-05	gene-G4B84_001192	-
G4B84_001752	7.83	56.48	-2.8548	8.4521e-07	1.4022e-05	gene-G4B84_001752	-
G4B84_007281	239.11	781.57	-1.7093	8.4382e-07	1.4022e-05	gene-G4B84_007281	-
G4B84_012119	154.95	28.74	2.4178	8.4474e-07	1.4022e-05	gene-G4B84_012119	-
G4B84_000127	374.92	1611	-2.1	8.5666e-07	1.4194e-05	gene-G4B84_000127	-
G4B84_006425	95.89	654.37	-2.778	8.6553e-07	1.4322e-05	gene-G4B84_006425	-
G4B84_007884	1.37	33.25	-4.6015	8.7807e-07	1.4492e-05	gene-G4B84_007884	-
G4B84_008205	20.6	91.81	-2.1339	8.7755e-07	1.4492e-05	gene-G4B84_008205	-
G4B84_006723	562.56	1695.55	-1.5911	9.4129e-07	1.5515e-05	gene-G4B84_006723	-
G4B84_011507	6.1	58.39	-3.2908	9.4593e-07	1.5571e-05	gene-G4B84_011507	-
G4B84_004733	17346.9	75831.5	-2.1281	9.565e-07	1.5704e-05	gene-G4B84_004733	-
Novel.6698	18.81	96.68	-2.3675	9.5541e-07	1.5704e-05	-	-
G4B84_008315	550.47	90.83	2.6035	9.6996e-07	1.5904e-05	gene-G4B84_008315	-
G4B84_012060	458.22	1365.45	-1.5752	9.7489e-07	1.5964e-05	gene-G4B84_012060	-
G4B84_010455	2253.04	11392.1	-2.3383	9.7671e-07	1.5974e-05	gene-G4B84_010455	-
G4B84_005019	11.06	71.84	-2.6481	9.7835e-07	1.598e-05	gene-G4B84_005019	-
G4B84_010083	157.43	39.59	1.9924	9.9048e-07	1.6157e-05	gene-G4B84_010083	-
G4B84_010606	407.88	1079.31	-1.403	1.0194e-06	1.6607e-05	gene-G4B84_010606	-
G4B84_005882	509.41	191.51	1.411	1.028e-06	1.6726e-05	gene-G4B84_005882	-
G4B84_000190	520.34	1544.98	-1.5713	1.0803e-06	1.7554e-05	gene-G4B84_000190	-
G4B84_003884	1579.94	629.13	1.3282	1.1017e-06	1.7879e-05	gene-G4B84_003884	-
G4B84_007689	120.01	34.38	1.7806	1.1208e-06	1.8166e-05	gene-G4B84_007689	-
G4B84_011535	8.65	81.58	-3.2775	1.1345e-06	1.8341e-05	gene-G4B84_011535	-
Novel.316	1571.9	342.84	2.1967	1.1332e-06	1.8341e-05	-	-
G4B84_002290	11.42	70.19	-2.6124	1.1393e-06	1.8394e-05	gene-G4B84_002290	-
G4B84_010225	161.34	36.25	2.1312	1.146e-06	1.848e-05	gene-G4B84_010225	-
G4B84_005106	4.9	43.98	-3.2021	1.1478e-06	1.8484e-05	gene-G4B84_005106	-
G4B84_007641	15.64	76.24	-2.2968	1.1496e-06	1.849e-05	gene-G4B84_007641	-
G4B84_009391	34.3	119.66	-1.8116	1.1836e-06	1.9012e-05	gene-G4B84_009391	-
G4B84_009108	49.89	159.3	-1.6719	1.1876e-06	1.9052e-05	gene-G4B84_009108	-
G4B84_004318	7.1	47.54	-2.8067	1.215e-06	1.9468e-05	gene-G4B84_004318	-
G4B84_008358	102.25	27.1	1.9409	1.2354e-06	1.977e-05	gene-G4B84_008358	-
G4B84_001001	272.5	929.08	-1.7707	1.2376e-06	1.978e-05	gene-G4B84_001001	-
G4B84_007949	131.47	367.16	-1.4779	1.263e-06	2.016e-05	gene-G4B84_007949	-
G4B84_003854	339.66	88.62	1.946	1.2785e-06	2.0382e-05	gene-G4B84_003854	-
G4B84_003452	12.79	67.3	-2.4355	1.2925e-06	2.0579e-05	gene-G4B84_003452	-
G4B84_005472	56660.2	18694	1.5998	1.2945e-06	2.0586e-05	gene-G4B84_005472	-
G4B84_005266	5464.92	2077.13	1.3957	1.3073e-06	2.0762e-05	gene-G4B84_005266	-
G4B84_006352	2877.76	925.89	1.6359	1.3119e-06	2.0809e-05	gene-G4B84_006352	-
G4B84_001007	488.68	1970.7	-2.0113	1.3425e-06	2.1268e-05	gene-G4B84_001007	-
G4B84_008421	261.12	684.35	-1.3905	1.3559e-06	2.1454e-05	gene-G4B84_008421	-
G4B84_000683	240.74	789.48	-1.7135	1.3648e-06	2.1568e-05	gene-G4B84_000683	-
Novel.7127	82.38	19.93	2.0861	1.3843e-06	2.1849e-05	-	-
G4B84_011280	3.76	34.86	-3.2148	1.4263e-06	2.2483e-05	gene-G4B84_011280	-
G4B84_006462	1.24	36.69	-5.1095	1.4329e-06	2.2559e-05	gene-G4B84_006462	-
Novel.3969	0.63	32.52	-5.5854	1.4356e-06	2.2573e-05	-	-
G4B84_001207	59.49	254.94	-2.1119	1.4435e-06	2.2669e-05	gene-G4B84_001207	-
G4B84_002523	212.2	600.59	-1.5046	1.4536e-06	2.28e-05	gene-G4B84_002523	-
G4B84_009404	340.22	1021.14	-1.5867	1.4832e-06	2.3235e-05	gene-G4B84_009404	-
G4B84_011583	3.28	38.76	-3.7105	1.4959e-06	2.3405e-05	gene-G4B84_011583	-
G4B84_003077	46.43	257.57	-2.4746	1.521e-06	2.3768e-05	gene-G4B84_003077	-
G4B84_006925	309.68	1406.91	-2.1823	1.5328e-06	2.3893e-05	gene-G4B84_006925	-
G4B84_012157	133.37	38.63	1.7807	1.5311e-06	2.3893e-05	gene-G4B84_012157	-
G4B84_006883	10694.4	3236.05	1.7246	1.5394e-06	2.3967e-05	gene-G4B84_006883	-
G4B84_006304	23.4	96.43	-2.0316	1.5722e-06	2.4448e-05	gene-G4B84_006304	-
G4B84_007616	1202.2	336.53	1.8374	1.5979e-06	2.4817e-05	gene-G4B84_007616	-
G4B84_004040	194.48	70.25	1.4665	1.6238e-06	2.5188e-05	gene-G4B84_004040	-
G4B84_012243	350.7	99.63	1.8041	1.6713e-06	2.5893e-05	gene-G4B84_012243	-
G4B84_007595	23.36	94.85	-2.0325	1.7445e-06	2.6994e-05	gene-G4B84_007595	-
G4B84_008531	865.61	302.09	1.5184	1.7524e-06	2.7082e-05	gene-G4B84_008531	-
G4B84_010393	386.89	1416.47	-1.8733	1.7769e-06	2.7427e-05	gene-G4B84_010393	-
G4B84_001551	141.4	562.56	-1.9888	1.8184e-06	2.8035e-05	gene-G4B84_001551	-
G4B84_002997	21.42	83.51	-1.9859	1.8214e-06	2.8046e-05	gene-G4B84_002997	-
G4B84_002901	58.13	208.01	-1.8514	1.8283e-06	2.8118e-05	gene-G4B84_002901	-
G4B84_004097	1446.72	5676.44	-1.9715	1.856e-06	2.851e-05	gene-G4B84_004097	-
G4B84_008334	99.55	319.36	-1.6799	1.8801e-06	2.8846e-05	gene-G4B84_008334	-
G4B84_007946	151.95	736.13	-2.279	1.8964e-06	2.9025e-05	gene-G4B84_007946	-
Novel.2141	1035.83	378.78	1.4542	1.8942e-06	2.9025e-05	-	-
Novel.1674	125.5	36.25	1.8069	1.9156e-06	2.9283e-05	-	-
G4B84_005317	9.66	58.42	-2.5529	1.9635e-06	2.9979e-05	gene-G4B84_005317	-
G4B84_005967	182.95	596.68	-1.7035	1.9679e-06	3.001e-05	gene-G4B84_005967	-
G4B84_010762	125	575.97	-2.212	1.9886e-06	3.0289e-05	gene-G4B84_010762	-
G4B84_000080	94.36	22.71	2.0364	2.0092e-06	3.0566e-05	gene-G4B84_000080	-
G4B84_007659	63.36	202.57	-1.6749	2.0374e-06	3.0958e-05	gene-G4B84_007659	-
G4B84_002777	3004.77	1341.71	1.163	2.057e-06	3.1218e-05	gene-G4B84_002777	-
G4B84_005738	402.88	98.28	2.0421	2.0635e-06	3.1279e-05	gene-G4B84_005738	-
G4B84_000923	3976.57	1386.52	1.5203	2.0828e-06	3.1534e-05	gene-G4B84_000923	-
G4B84_010662	284.47	55.41	2.3606	2.1005e-06	3.1763e-05	gene-G4B84_010662	-
G4B84_006075	2278.06	959.42	1.2487	2.1248e-06	3.2093e-05	gene-G4B84_006075	-
G4B84_011037	392.12	1487.97	-1.9265	2.1303e-06	3.2138e-05	gene-G4B84_011037	-
G4B84_009761	152.33	681.96	-2.1652	2.1336e-06	3.2149e-05	gene-G4B84_009761	-
G4B84_006020	804.49	204.51	1.975	2.1454e-06	3.2288e-05	gene-G4B84_006020	-
G4B84_001357	298	806.74	-1.4382	2.1663e-06	3.2565e-05	gene-G4B84_001357	-
G4B84_003079	200.35	62.26	1.6964	2.187e-06	3.2836e-05	gene-G4B84_003079	-
G4B84_010612	5.62	40.5	-2.8151	2.197e-06	3.2947e-05	gene-G4B84_010612	-
G4B84_007199	988.75	3325.28	-1.7502	2.2352e-06	3.3481e-05	gene-G4B84_007199	-
G4B84_008643	71.99	239.94	-1.7356	2.2388e-06	3.3494e-05	gene-G4B84_008643	-
G4B84_005201	641.35	2417	-1.9152	2.2418e-06	3.35e-05	gene-G4B84_005201	-
G4B84_007527	100.6	272.46	-1.4427	2.309e-06	3.4463e-05	gene-G4B84_007527	-
G4B84_007254	42.55	148.04	-1.7933	2.4154e-06	3.6008e-05	gene-G4B84_007254	-
G4B84_009000	13105.5	3377.99	1.9561	2.4677e-06	3.6745e-05	gene-G4B84_009000	-
G4B84_006656	0.26	28.24	-6.2405	2.4717e-06	3.6762e-05	gene-G4B84_006656	-
G4B84_004023	76.91	18.16	2.071	2.4747e-06	3.6763e-05	gene-G4B84_004023	-
G4B84_000667	1309.59	314.9	2.057	2.4792e-06	3.6787e-05	gene-G4B84_000667	-
G4B84_000271	1973.01	797.95	1.3047	2.5431e-06	3.7646e-05	gene-G4B84_000271	-
Novel.8798	15.57	70.03	-2.196	2.5402e-06	3.7646e-05	-	-
G4B84_012114	5688.29	1836.2	1.6314	2.6101e-06	3.8593e-05	gene-G4B84_012114	-
G4B84_003482	1513.81	547.76	1.4675	2.655e-06	3.921e-05	gene-G4B84_003482	-
G4B84_009658	759.78	2928.97	-1.9479	2.6934e-06	3.9718e-05	gene-G4B84_009658	-
Novel.5305	2995.35	12351.4	-2.0441	2.6956e-06	3.9718e-05	-	-
G4B84_007743	112.61	25.96	2.1401	2.703e-06	3.9781e-05	gene-G4B84_007743	-
G4B84_008280	13.18	57.95	-2.1348	2.7134e-06	3.9888e-05	gene-G4B84_008280	-
G4B84_010643	15.85	67.08	-2.0916	2.7402e-06	4.0234e-05	gene-G4B84_010643	-
G4B84_011033	224.9	542.71	-1.2714	2.751e-06	4.0346e-05	gene-G4B84_011033	-
G4B84_001028	194.49	578.92	-1.5762	2.757e-06	4.0387e-05	gene-G4B84_001028	-
G4B84_000182	238.27	38.62	2.6113	2.766e-06	4.0472e-05	gene-G4B84_000182	-
G4B84_005649	5.05	38.88	-2.939	2.8394e-06	4.1498e-05	gene-G4B84_005649	-
Novel.5996	350.14	112.86	1.6373	2.8742e-06	4.1958e-05	-	-
G4B84_008374	33.62	3.44	3.2706	2.902e-06	4.2315e-05	gene-G4B84_008374	-
G4B84_012274	584.3	176.84	1.7337	2.9887e-06	4.3529e-05	gene-G4B84_012274	-
G4B84_000411	638.31	1572.13	-1.3009	3.058e-06	4.4487e-05	gene-G4B84_000411	-
G4B84_010333	186.61	40.65	2.2281	3.0981e-06	4.5018e-05	gene-G4B84_010333	-
G4B84_003309	11812.4	44447.5	-1.9118	3.1158e-06	4.5224e-05	gene-G4B84_003309	-
G4B84_010883	4208.42	899.79	2.2261	3.1807e-06	4.6113e-05	gene-G4B84_010883	-
G4B84_005792	22.94	0	7.0547	3.2073e-06	4.6445e-05	gene-G4B84_005792	-
G4B84_007274	3.33	33.56	-3.3183	3.2437e-06	4.6919e-05	gene-G4B84_007274	-
G4B84_007681	111.85	29.99	1.899	3.2937e-06	4.7588e-05	gene-G4B84_007681	-
Novel.8554	45.06	134.59	-1.5737	3.2987e-06	4.7606e-05	-	-
G4B84_000337	312.29	106.63	1.5593	3.3586e-06	4.8414e-05	gene-G4B84_000337	-
G4B84_006022	79.64	18.97	2.0795	3.3736e-06	4.8575e-05	gene-G4B84_006022	-
G4B84_009796	3.41	35.57	-3.4535	3.3975e-06	4.8864e-05	gene-G4B84_009796	-
G4B84_000149	2.9	30.97	-3.4895	3.4665e-06	4.9799e-05	gene-G4B84_000149	-
G4B84_000926	830.66	2223.03	-1.4201	3.5073e-06	5.0328e-05	gene-G4B84_000926	-
G4B84_011430	52.96	247.79	-2.2422	3.5327e-06	5.0636e-05	gene-G4B84_011430	-
G4B84_006140	687.49	1611.91	-1.229	3.577e-06	5.1213e-05	gene-G4B84_006140	-
G4B84_002627	196.09	509.43	-1.3738	3.59e-06	5.134e-05	gene-G4B84_002627	-
G4B84_005301	12.72	84.42	-2.7576	3.6484e-06	5.2117e-05	gene-G4B84_005301	-
G4B84_010177	3.27	46.29	-3.668	3.6755e-06	5.2444e-05	gene-G4B84_010177	-
G4B84_001980	155.99	430.2	-1.462	3.6994e-06	5.2725e-05	gene-G4B84_001980	-
G4B84_007386	9.93	55.44	-2.5046	3.7537e-06	5.3439e-05	gene-G4B84_007386	-
G4B84_002984	2150.07	701.63	1.615	3.7647e-06	5.3536e-05	gene-G4B84_002984	-
G4B84_009016	187.13	43.19	2.1023	3.7825e-06	5.3715e-05	gene-G4B84_009016	-
Novel.2178	37737.1	11455.2	1.72	3.7858e-06	5.3715e-05	-	-
G4B84_005145	261.16	676.76	-1.3724	3.7929e-06	5.3756e-05	gene-G4B84_005145	-
G4B84_006467	142.15	41.37	1.7965	3.8933e-06	5.5117e-05	gene-G4B84_006467	-
G4B84_001713	49.38	3.94	3.5937	4.1213e-06	5.8279e-05	gene-G4B84_001713	-
G4B84_001596	56.08	213.88	-1.9442	4.2422e-06	5.9922e-05	gene-G4B84_001596	-
G4B84_011378	33.91	118.29	-1.8013	4.3275e-06	6.1059e-05	gene-G4B84_011378	-
G4B84_008465	2978.04	9324.29	-1.6465	4.3559e-06	6.139e-05	gene-G4B84_008465	-
G4B84_004731	8226.57	30792.8	-1.9043	4.5039e-06	6.3406e-05	gene-G4B84_004731	-
G4B84_009586	1653.5	4456.3	-1.4306	4.5941e-06	6.4604e-05	gene-G4B84_009586	-
G4B84_008728	15.83	67.75	-2.1109	4.639e-06	6.5163e-05	gene-G4B84_008728	-
G4B84_003082	175.26	494.38	-1.4987	4.6704e-06	6.5472e-05	gene-G4B84_003082	-
G4B84_008870	653.47	202.55	1.6932	4.6714e-06	6.5472e-05	gene-G4B84_008870	-
G4B84_004462	53.19	11.11	2.2205	4.6768e-06	6.5476e-05	gene-G4B84_004462	-
G4B84_012153	487.64	1826.82	-1.907	4.6831e-06	6.5491e-05	gene-G4B84_012153	-
G4B84_001367	14	85.67	-2.598	4.6971e-06	6.5614e-05	gene-G4B84_001367	-
G4B84_005080	777.88	282.64	1.4597	4.7106e-06	6.5731e-05	gene-G4B84_005080	-
G4B84_009020	2329.79	1058.92	1.1375	4.7339e-06	6.5982e-05	gene-G4B84_009020	-
G4B84_001526	44.77	150.33	-1.7534	4.806e-06	6.6839e-05	gene-G4B84_001526	-
G4B84_003061	93.08	258.73	-1.4719	4.8058e-06	6.6839e-05	gene-G4B84_003061	-
Novel.565	41943.2	13681.1	1.6163	4.812e-06	6.685e-05	-	-
G4B84_002170	622.22	3213.24	-2.3693	4.8659e-06	6.7524e-05	gene-G4B84_002170	-
G4B84_008570	1906.04	777.96	1.2935	5.0124e-06	6.9481e-05	gene-G4B84_008570	-
G4B84_002976	65.37	245.09	-1.9112	5.0633e-06	7.0109e-05	gene-G4B84_002976	-
G4B84_010286	73.81	280.63	-1.9223	5.0907e-06	7.0412e-05	gene-G4B84_010286	-
G4B84_011722	358.79	132.39	1.4343	5.1952e-06	7.1701e-05	gene-G4B84_011722	-
G4B84_012246	195.85	55.66	1.8021	5.1903e-06	7.1701e-05	gene-G4B84_012246	-
G4B84_006565	1396.08	506.72	1.4612	5.2134e-06	7.1874e-05	gene-G4B84_006565	-
G4B84_001816	142.03	363.26	-1.3578	5.3622e-06	7.3844e-05	gene-G4B84_001816	-
G4B84_003125	807.47	1987.58	-1.2999	5.4532e-06	7.5016e-05	gene-G4B84_003125	-
Novel.931	259.31	81.02	1.6862	5.4693e-06	7.5155e-05	-	-
G4B84_001105	52.67	197.31	-1.9015	5.6653e-06	7.7764e-05	gene-G4B84_001105	-
G4B84_002051	57.87	254.48	-2.1435	5.853e-06	8.0253e-05	gene-G4B84_002051	-
G4B84_012120	57.87	5.65	3.333	5.9427e-06	8.1395e-05	gene-G4B84_012120	-
G4B84_006699	12.5	63.66	-2.3522	5.964e-06	8.1599e-05	gene-G4B84_006699	-
G4B84_005937	115	36.74	1.6289	6.0495e-06	8.2678e-05	gene-G4B84_005937	-
G4B84_008393	432.62	1074.3	-1.3118	6.1368e-06	8.3782e-05	gene-G4B84_008393	-
G4B84_007458	22.29	0.32	6.038	6.193e-06	8.4457e-05	gene-G4B84_007458	-
G4B84_002888	943.87	327.69	1.5261	6.2602e-06	8.5281e-05	gene-G4B84_002888	-
G4B84_006407	21815	9887.23	1.1418	6.2876e-06	8.5563e-05	gene-G4B84_006407	-
G4B84_003412	9904.64	31485.5	-1.6686	6.3244e-06	8.5971e-05	gene-G4B84_003412	-
G4B84_005073	1469.96	5256.85	-1.8387	6.3431e-06	8.6133e-05	gene-G4B84_005073	-
G4B84_009858	5408.22	2312.23	1.2263	6.35e-06	8.6134e-05	gene-G4B84_009858	-
G4B84_002064	52.23	10.26	2.3136	6.4613e-06	8.7549e-05	gene-G4B84_002064	-
G4B84_004139	28.81	0.79	5.5085	6.4832e-06	8.7603e-05	gene-G4B84_004139	-
G4B84_004616	232.67	649.36	-1.4814	6.4886e-06	8.7603e-05	gene-G4B84_004616	-
G4B84_006271	24.84	98.26	-1.9877	6.4739e-06	8.7603e-05	gene-G4B84_006271	-
G4B84_009415	814.77	134.69	2.5983	6.4929e-06	8.7603e-05	gene-G4B84_009415	-
G4B84_002401	11.45	53.93	-2.2381	6.5701e-06	8.855e-05	gene-G4B84_002401	-
G4B84_004927	827.89	3021.47	-1.8683	6.5837e-06	8.8639e-05	gene-G4B84_004927	-
G4B84_007079	83.13	361.82	-2.1262	6.6428e-06	8.9244e-05	gene-G4B84_007079	-
G4B84_010235	263.19	78.38	1.7357	6.6361e-06	8.9244e-05	gene-G4B84_010235	-
G4B84_010366	401.04	1769.42	-2.1435	6.8554e-06	9.2002e-05	gene-G4B84_010366	-
G4B84_002926	24734.7	10413.1	1.2482	7.1516e-06	9.5875e-05	gene-G4B84_002926	-
G4B84_004084	1.05	27.47	-4.4391	7.2668e-06	9.7317e-05	gene-G4B84_004084	-
G4B84_001676	3635.36	13324	-1.8741	7.3338e-06	9.8109e-05	gene-G4B84_001676	-
G4B84_001932	449.12	124.29	1.8596	7.5549e-06	0.00010085	gene-G4B84_001932	-
G4B84_007615	179.47	624.6	-1.8037	7.5492e-06	0.00010085	gene-G4B84_007615	-
G4B84_009722	125.64	337.86	-1.4262	7.639e-06	0.00010187	gene-G4B84_009722	-
G4B84_006074	1102.15	406.34	1.4409	7.7206e-06	0.00010285	gene-G4B84_006074	-
G4B84_010920	292.23	74.46	1.9612	7.7584e-06	0.00010324	gene-G4B84_010920	-
G4B84_012262	284.63	675.15	-1.2457	7.8173e-06	0.00010392	gene-G4B84_012262	-
G4B84_006969	9.09	85.06	-3.2293	7.8295e-06	0.00010397	gene-G4B84_006969	-
G4B84_009065	312.81	98.21	1.6807	7.9013e-06	0.00010481	gene-G4B84_009065	-
G4B84_006301	6001.91	25226.7	-2.0716	7.9164e-06	0.0001049	gene-G4B84_006301	-
G4B84_009834	214.14	507.66	-1.2462	8.0273e-06	0.00010626	gene-G4B84_009834	-
G4B84_000605	333.83	124.6	1.4202	8.1169e-06	0.00010734	gene-G4B84_000605	-
G4B84_001154	1081.68	402.06	1.4283	8.145e-06	0.0001076	gene-G4B84_001154	-
G4B84_001278	86.08	24.98	1.7671	8.2209e-06	0.00010837	gene-G4B84_001278	-
G4B84_004705	1041.43	441.3	1.2377	8.2135e-06	0.00010837	gene-G4B84_004705	-
G4B84_010217	60.78	8.97	2.7796	8.2438e-06	0.00010856	gene-G4B84_010217	-
G4B84_001976	339.68	937.07	-1.4666	8.3496e-06	0.00010973	gene-G4B84_001976	-
G4B84_010364	4.07	34.46	-3.1538	8.3419e-06	0.00010973	gene-G4B84_010364	-
G4B84_011288	27.85	2.86	3.3534	8.4394e-06	0.00011079	gene-G4B84_011288	-
G4B84_006316	2434.77	8528.89	-1.8088	8.4588e-06	0.00011093	gene-G4B84_006316	-
G4B84_003591	2462.95	1146.61	1.1032	8.6227e-06	0.00011284	gene-G4B84_003591	-
G4B84_005753	347.34	145.83	1.247	8.6221e-06	0.00011284	gene-G4B84_005753	-
G4B84_006509	427.67	1285.39	-1.5865	8.6406e-06	0.00011296	gene-G4B84_006509	-
G4B84_002497	0.63	27.95	-5.377	8.7328e-06	0.00011405	gene-G4B84_002497	-
G4B84_003921	4.65	36.49	-2.8921	8.764e-06	0.00011434	gene-G4B84_003921	-
G4B84_002972	337.78	1471.11	-2.124	8.8089e-06	0.00011481	gene-G4B84_002972	-
G4B84_011675	5045.46	2186.24	1.2071	8.8898e-06	0.00011574	gene-G4B84_011675	-
G4B84_005703	65.82	182.29	-1.4732	8.9299e-06	0.00011614	gene-G4B84_005703	-
G4B84_002320	35.18	5.69	2.5982	9.1092e-06	0.00011835	gene-G4B84_002320	-
G4B84_006454	8.47	47.65	-2.4334	9.2183e-06	0.00011965	gene-G4B84_006454	-
G4B84_009416	234.03	35.3	2.7382	9.2465e-06	0.00011989	gene-G4B84_009416	-
G4B84_003385	17.11	83.04	-2.2881	9.3023e-06	0.00012049	gene-G4B84_003385	-
G4B84_009408	203.64	476.87	-1.227	9.4827e-06	0.0001227	gene-G4B84_009408	-
G4B84_005337	2271.06	978.08	1.2156	9.5568e-06	0.00012354	gene-G4B84_005337	-
G4B84_006991	43.4	152.11	-1.8129	9.6011e-06	0.00012398	gene-G4B84_006991	-
G4B84_010091	411.61	969.69	-1.236	9.6276e-06	0.0001242	gene-G4B84_010091	-
G4B84_001560	41.85	132.87	-1.671	9.7354e-06	0.00012546	gene-G4B84_001560	-
G4B84_007775	136.54	26	2.3948	9.7881e-06	0.00012601	gene-G4B84_007775	-
G4B84_009682	118.44	336.89	-1.5	9.8143e-06	0.00012622	gene-G4B84_009682	-
G4B84_001128	31.39	107.23	-1.7552	1.01e-05	0.00012976	gene-G4B84_001128	-
G4B84_011323	1739.14	6237.68	-1.8431	1.0291e-05	0.00013208	gene-G4B84_011323	-
G4B84_012050	62.38	12.3	2.3258	1.0374e-05	0.00013301	gene-G4B84_012050	-
G4B84_005614	779.64	169.72	2.1984	1.0442e-05	0.00013374	gene-G4B84_005614	-
G4B84_006303	1774.04	5061.51	-1.5129	1.0488e-05	0.00013406	gene-G4B84_006303	-
G4B84_010234	81.29	10.76	2.8849	1.0486e-05	0.00013406	gene-G4B84_010234	-
G4B84_002739	11.85	77.51	-2.6671	1.0656e-05	0.00013608	gene-G4B84_002739	-
G4B84_005905	14.6	73.7	-2.304	1.0876e-05	0.00013874	gene-G4B84_005905	-
G4B84_010051	2.07	28.04	-3.7782	1.0946e-05	0.00013949	gene-G4B84_010051	-
G4B84_009012	53.44	209.23	-1.9578	1.1148e-05	0.00014193	gene-G4B84_009012	-
G4B84_011735	57.61	11.34	2.3618	1.1175e-05	0.00014213	gene-G4B84_011735	-
Novel.5784	89.74	24.53	1.8931	1.1212e-05	0.00014246	-	-
G4B84_001735	130.91	368.38	-1.4905	1.1269e-05	0.00014303	gene-G4B84_001735	-
G4B84_011536	6.68	53.05	-3.0636	1.1289e-05	0.00014307	gene-G4B84_011536	-
G4B84_011960	790.56	336.58	1.2298	1.1294e-05	0.00014307	gene-G4B84_011960	-
G4B84_010926	28430.2	11463.3	1.3104	1.1318e-05	0.00014323	gene-G4B84_010926	-
G4B84_010314	204.62	68.23	1.5815	1.16e-05	0.00014664	gene-G4B84_010314	-
G4B84_007233	57.65	14.8	1.9747	1.1739e-05	0.00014826	gene-G4B84_007233	-
G4B84_009282	43.89	124.02	-1.5015	1.1856e-05	0.00014958	gene-G4B84_009282	-
G4B84_005003	46.55	150.95	-1.6919	1.2046e-05	0.00015183	gene-G4B84_005003	-
G4B84_002603	3642.8	1577.34	1.208	1.2102e-05	0.00015239	gene-G4B84_002603	-
G4B84_009812	214.04	78.4	1.4429	1.2155e-05	0.0001529	gene-G4B84_009812	-
G4B84_004405	1023.08	378.2	1.4346	1.2193e-05	0.00015323	gene-G4B84_004405	-
Novel.6154	26.27	2.27	3.5918	1.225e-05	0.00015379	-	-
G4B84_001061	5319.12	1716.9	1.6316	1.2437e-05	0.00015587	gene-G4B84_001061	-
G4B84_006553	20.65	90.75	-2.1387	1.244e-05	0.00015587	gene-G4B84_006553	-
G4B84_001620	2.63	28.99	-3.4164	1.2668e-05	0.00015857	gene-G4B84_001620	-
G4B84_012190	48.34	10.87	2.1738	1.271e-05	0.00015893	gene-G4B84_012190	-
Novel.3222	284.62	92.24	1.6347	1.2736e-05	0.0001591	-	-
G4B84_008214	1061.7	2415.66	-1.1865	1.2823e-05	0.00016003	gene-G4B84_008214	-
Novel.2934	409.54	1220.72	-1.5772	1.2989e-05	0.00016195	-	-
G4B84_007722	0.37	21.86	-5.8641	1.3187e-05	0.00016425	gene-G4B84_007722	-
G4B84_001517	0.87	26.67	-5.2309	1.3514e-05	0.00016814	gene-G4B84_001517	-
G4B84_003339	711.7	1745.94	-1.2948	1.3526e-05	0.00016814	gene-G4B84_003339	-
G4B84_004406	1184.33	459.94	1.3643	1.3757e-05	0.00017084	gene-G4B84_004406	-
G4B84_006339	10982	38188.7	-1.798	1.3916e-05	0.00017264	gene-G4B84_006339	-
G4B84_005262	21.23	91.95	-2.107	1.3969e-05	0.00017314	gene-G4B84_005262	-
G4B84_010916	107.23	301.03	-1.4867	1.42e-05	0.00017583	gene-G4B84_010916	-
G4B84_004784	1128.19	2690.86	-1.254	1.4398e-05	0.00017811	gene-G4B84_004784	-
G4B84_006293	816.18	329.72	1.3102	1.4422e-05	0.00017822	gene-G4B84_006293	-
G4B84_005349	14.15	57.71	-2.0507	1.4572e-05	0.0001799	gene-G4B84_005349	-
G4B84_009822	526.86	199	1.4044	1.4628e-05	0.00018041	gene-G4B84_009822	-
G4B84_008098	2552.05	1020.41	1.3226	1.4871e-05	0.00018323	gene-G4B84_008098	-
G4B84_001787	442.6	120.28	1.874	1.4915e-05	0.0001836	gene-G4B84_001787	-
G4B84_005594	340.42	140.81	1.2715	1.4988e-05	0.00018431	gene-G4B84_005594	-
G4B84_010832	58.2	191.63	-1.7314	1.5221e-05	0.000187	gene-G4B84_010832	-
G4B84_001027	28.21	109.25	-1.9754	1.5393e-05	0.00018893	gene-G4B84_001027	-
G4B84_000732	302.72	780.15	-1.3678	1.5711e-05	0.00019227	gene-G4B84_000732	-
G4B84_003337	2921.19	8035.12	-1.4599	1.5706e-05	0.00019227	gene-G4B84_003337	-
G4B84_005358	18.03	66.8	-1.8962	1.5726e-05	0.00019227	gene-G4B84_005358	-
G4B84_009580	2434.75	638.04	1.9331	1.5687e-05	0.00019227	gene-G4B84_009580	-
G4B84_000941	141.5	47.73	1.5776	1.5752e-05	0.0001924	gene-G4B84_000941	-
G4B84_008890	48.21	177.75	-1.8961	1.6029e-05	0.00019559	gene-G4B84_008890	-
G4B84_002602	1539.98	679.37	1.1811	1.6216e-05	0.00019768	gene-G4B84_002602	-
G4B84_006664	61.51	231.55	-1.9093	1.6681e-05	0.00020316	gene-G4B84_006664	-
G4B84_000756	251.8	829.47	-1.7226	1.6848e-05	0.00020498	gene-G4B84_000756	-
G4B84_005713	8.91	44.52	-2.3333	1.6862e-05	0.00020498	gene-G4B84_005713	-
G4B84_000407	637.19	1493.33	-1.2281	1.7226e-05	0.0002092	gene-G4B84_000407	-
G4B84_007905	259.86	52.15	2.3251	1.7274e-05	0.00020958	gene-G4B84_007905	-
G4B84_003093	2070.7	704.47	1.5563	1.7742e-05	0.00021505	gene-G4B84_003093	-
G4B84_006681	428.28	145.59	1.5555	1.7898e-05	0.00021673	gene-G4B84_006681	-
G4B84_004434	64.63	16.66	1.9992	1.7952e-05	0.00021717	gene-G4B84_004434	-
G4B84_007173	2725.47	10305.2	-1.9191	1.8223e-05	0.00022024	gene-G4B84_007173	-
Novel.5187	8.54	55.07	-2.7132	1.8354e-05	0.00022161	-	-
G4B84_005224	324.27	130.84	1.3064	1.8434e-05	0.00022237	gene-G4B84_005224	-
G4B84_003456	5.78	41.46	-2.8381	1.8505e-05	0.0002228	gene-G4B84_003456	-
G4B84_012276	382909	111561	1.7792	1.8489e-05	0.0002228	gene-G4B84_012276	-
G4B84_002468	17.37	86.63	-2.3417	1.857e-05	0.00022337	gene-G4B84_002468	-
G4B84_000061	55.35	11.85	2.2661	1.8825e-05	0.00022622	gene-G4B84_000061	-
G4B84_000051	1664.73	518.87	1.6817	1.8923e-05	0.00022719	gene-G4B84_000051	-
G4B84_007366	282.79	750.1	-1.4103	1.8959e-05	0.0002274	gene-G4B84_007366	-
G4B84_003372	444.23	1164.56	-1.3918	1.8984e-05	0.00022749	gene-G4B84_003372	-
G4B84_010216	120.67	35.29	1.7428	1.9253e-05	0.00023027	gene-G4B84_010216	-
G4B84_012106	1795.52	818.69	1.1336	1.924e-05	0.00023027	gene-G4B84_012106	-
G4B84_008505	45.57	136.65	-1.5764	1.928e-05	0.00023037	gene-G4B84_008505	-
G4B84_004481	8.36	47.05	-2.5211	1.9601e-05	0.00023399	gene-G4B84_004481	-
G4B84_003773	378.3	153.07	1.3022	1.9859e-05	0.00023685	gene-G4B84_003773	-
G4B84_012216	197.45	24.46	3.0129	2.0022e-05	0.00023857	gene-G4B84_012216	-
G4B84_007820	4.94	35.15	-2.7574	2.0494e-05	0.00024396	gene-G4B84_007820	-
G4B84_010677	20.53	74.35	-1.8467	2.0552e-05	0.00024442	gene-G4B84_010677	-
G4B84_005531	9.88	44.73	-2.1707	2.0651e-05	0.00024537	gene-G4B84_005531	-
G4B84_009668	455.46	194.82	1.2276	2.0771e-05	0.00024656	gene-G4B84_009668	-
G4B84_009703	181.62	482.47	-1.4094	2.1001e-05	0.00024906	gene-G4B84_009703	-
G4B84_005380	42.03	150.97	-1.8584	2.12e-05	0.00025118	gene-G4B84_005380	-
G4B84_010910	24.43	1.19	4.3515	2.1329e-05	0.00025248	gene-G4B84_010910	-
G4B84_011892	14.3	67.76	-2.2304	2.1522e-05	0.00025452	gene-G4B84_011892	-
G4B84_006511	127.41	308.16	-1.2792	2.1848e-05	0.00025813	gene-G4B84_006511	-
G4B84_004534	2.57	24.69	-3.336	2.1875e-05	0.00025821	gene-G4B84_004534	-
Novel.3437	302.95	687.53	-1.1824	2.1926e-05	0.00025857	-	-
Novel.8342	67.25	356.43	-2.4185	2.2252e-05	0.00026217	-	-
G4B84_003834	114.84	347.81	-1.6018	2.2425e-05	0.00026396	gene-G4B84_003834	-
G4B84_007582	5853.15	2100.33	1.4787	2.2903e-05	0.00026933	gene-G4B84_007582	-
G4B84_007647	705.3	298.81	1.2378	2.2994e-05	0.00027016	gene-G4B84_007647	-
G4B84_008024	80.73	21.26	1.9131	2.3471e-05	0.00027551	gene-G4B84_008024	-
G4B84_011594	12.56	60.93	-2.2301	2.3782e-05	0.0002789	gene-G4B84_011594	-
Novel.263	228.63	91.88	1.3255	2.3842e-05	0.00027935	-	-
Novel.2793	2.49	26.77	-3.3622	2.4222e-05	0.00028354	-	-
G4B84_007302	27.41	91.11	-1.7385	2.4539e-05	0.00028698	gene-G4B84_007302	-
G4B84_002437	54.14	175.5	-1.6991	2.4868e-05	0.00029055	gene-G4B84_002437	-
G4B84_003012	1162.37	477.82	1.2816	2.508e-05	0.00029249	gene-G4B84_003012	-
G4B84_009727	368.79	132.19	1.4837	2.5067e-05	0.00029249	gene-G4B84_009727	-
G4B84_003545	218.55	81.57	1.4265	2.5183e-05	0.00029342	gene-G4B84_003545	-
G4B84_006923	565.77	243.83	1.2176	2.5322e-05	0.0002945	gene-G4B84_006923	-
G4B84_010082	736.75	10.72	6.0808	2.5309e-05	0.0002945	gene-G4B84_010082	-
Novel.5961	159.01	44.51	1.8247	2.5706e-05	0.0002987	-	-
G4B84_001897	4126.43	1346.04	1.6161	2.6017e-05	0.00030203	gene-G4B84_001897	-
G4B84_006080	195.03	520.81	-1.4202	2.6116e-05	0.00030289	gene-G4B84_006080	-
G4B84_006484	231.27	76	1.5949	2.6166e-05	0.0003032	gene-G4B84_006484	-
G4B84_003271	572.21	1247.33	-1.1251	2.6457e-05	0.00030629	gene-G4B84_003271	-
G4B84_003010	338.54	1337.92	-1.9812	2.66e-05	0.00030766	gene-G4B84_003010	-
G4B84_005629	16.64	68.98	-2.0831	2.6716e-05	0.00030845	gene-G4B84_005629	-
Novel.7541	646.63	1771.59	-1.4546	2.6741e-05	0.00030845	-	-
Novel.8660	436.83	180.02	1.2792	2.6726e-05	0.00030845	-	-
G4B84_005458	626.01	279.34	1.1663	2.6945e-05	0.00031023	gene-G4B84_005458	-
G4B84_005648	5.7	37.84	-2.7181	2.6922e-05	0.00031023	gene-G4B84_005648	-
G4B84_001310	351.39	117.7	1.588	2.7004e-05	0.00031035	gene-G4B84_001310	-
G4B84_003207	307.3	685.31	-1.1584	2.6994e-05	0.00031035	gene-G4B84_003207	-
Novel.6913	112.5	36.99	1.6038	2.7379e-05	0.00031437	-	-
G4B84_006970	12.26	82.4	-2.7801	2.7717e-05	0.00031797	gene-G4B84_006970	-
G4B84_004888	2.24	25.41	-3.5881	2.7811e-05	0.00031875	gene-G4B84_004888	-
G4B84_001209	49.72	185.69	-1.9033	2.7859e-05	0.00031902	gene-G4B84_001209	-
G4B84_004425	1.92	23.9	-3.5768	2.8078e-05	0.00032123	gene-G4B84_004425	-
G4B84_010150	161.63	45.97	1.8051	2.8312e-05	0.00032362	gene-G4B84_010150	-
G4B84_011953	26860.8	10624.5	1.3381	2.8425e-05	0.00032461	gene-G4B84_011953	-
G4B84_000320	4048.34	10845.3	-1.4219	2.8567e-05	0.00032595	gene-G4B84_000320	-
G4B84_003942	12.5	52.72	-2.1092	2.8637e-05	0.00032645	gene-G4B84_003942	-
G4B84_004110	74.11	21.07	1.8448	2.8814e-05	0.00032779	gene-G4B84_004110	-
G4B84_012007	55.87	199.55	-1.8473	2.8832e-05	0.00032779	gene-G4B84_012007	-
Novel.6150	16.16	69.38	-2.1109	2.8787e-05	0.00032779	-	-
G4B84_006351	1930.06	4350.95	-1.1727	2.916e-05	0.00033092	gene-G4B84_006351	-
G4B84_009533	19305.4	62837.4	-1.7026	2.9135e-05	0.00033092	gene-G4B84_009533	-
G4B84_010420	1.87	24.57	-3.8266	2.9476e-05	0.0003342	gene-G4B84_010420	-
G4B84_004009	55.17	14.7	1.8808	2.9601e-05	0.00033532	gene-G4B84_004009	-
G4B84_007752	31.52	109.28	-1.7882	2.9646e-05	0.00033553	gene-G4B84_007752	-
G4B84_010175	365.49	58.85	2.6324	2.9717e-05	0.00033603	gene-G4B84_010175	-
G4B84_006840	2150.75	696.22	1.6272	3.007e-05	0.00033972	gene-G4B84_006840	-
G4B84_012082	3110.52	1220.14	1.3497	3.0137e-05	0.00034018	gene-G4B84_012082	-
G4B84_007123	42.21	119.85	-1.4996	3.0835e-05	0.00034774	gene-G4B84_007123	-
G4B84_002561	49459.4	16243.8	1.6064	3.0896e-05	0.00034812	gene-G4B84_002561	-
G4B84_003786	23.21	76.67	-1.7134	3.0981e-05	0.00034876	gene-G4B84_003786	-
G4B84_007023	5221.63	2190.96	1.2528	3.1654e-05	0.00035602	gene-G4B84_007023	-
G4B84_003368	1519.28	650.79	1.2235	3.1803e-05	0.00035738	gene-G4B84_003368	-
G4B84_007540	53.54	7.77	2.8719	3.2057e-05	0.00035992	gene-G4B84_007540	-
Novel.4988	38.38	5.83	2.7189	3.2179e-05	0.00036096	-	-
G4B84_004655	18.19	66.99	-1.8804	3.2426e-05	0.00036341	gene-G4B84_004655	-
G4B84_005659	157.02	462.11	-1.5575	3.264e-05	0.00036491	gene-G4B84_005659	-
G4B84_009427	11.06	52.67	-2.2157	3.2647e-05	0.00036491	gene-G4B84_009427	-
G4B84_010933	100.96	264.55	-1.3856	3.2675e-05	0.00036491	gene-G4B84_010933	-
Novel.4129	653.38	277.7	1.235	3.2616e-05	0.00036491	-	-
G4B84_010279	57.2	154.83	-1.4379	3.2947e-05	0.00036762	gene-G4B84_010279	-
G4B84_010006	13.57	83.79	-2.6295	3.3049e-05	0.00036843	gene-G4B84_010006	-
G4B84_008016	7.37	40.07	-2.4895	3.3362e-05	0.00037159	gene-G4B84_008016	-
G4B84_007009	9731.72	32944.1	-1.7593	3.3709e-05	0.00037513	gene-G4B84_007009	-
G4B84_001029	79.39	258.42	-1.7003	3.386e-05	0.00037648	gene-G4B84_001029	-
G4B84_000053	43.2	123.45	-1.5089	3.3989e-05	0.00037758	gene-G4B84_000053	-
G4B84_002356	8905.71	2082.1	2.097	3.452e-05	0.00038248	gene-G4B84_002356	-
G4B84_006000	20.34	84.74	-2.0927	3.4482e-05	0.00038248	gene-G4B84_006000	-
G4B84_009018	1187.44	396.39	1.5828	3.4492e-05	0.00038248	gene-G4B84_009018	-
G4B84_005541	160.98	516.58	-1.6875	3.5191e-05	0.00038957	gene-G4B84_005541	-
G4B84_003656	44.1	128.08	-1.5319	3.5313e-05	0.00039057	gene-G4B84_003656	-
Novel.3026	1190.44	428.91	1.4734	3.5493e-05	0.00039222	-	-
G4B84_008881	40.73	6.82	2.577	3.5729e-05	0.00039448	gene-G4B84_008881	-
G4B84_011616	1314.78	3260.07	-1.3102	3.5945e-05	0.00039652	gene-G4B84_011616	-
Novel.4576	65.22	14.99	2.1024	3.6199e-05	0.00039897	-	-
G4B84_012054	18.45	0.2	5.7711	3.6938e-05	0.00040677	gene-G4B84_012054	-
G4B84_002529	31.49	109.58	-1.7902	3.7032e-05	0.00040745	gene-G4B84_002529	-
G4B84_002154	34.57	135.94	-1.9923	3.7181e-05	0.00040873	gene-G4B84_002154	-
G4B84_008335	268.01	688.83	-1.36	3.736e-05	0.00041034	gene-G4B84_008335	-
G4B84_001354	247.7	577.16	-1.2215	3.769e-05	0.00041325	gene-G4B84_001354	-
G4B84_005428	39.9	116.39	-1.5345	3.7657e-05	0.00041325	gene-G4B84_005428	-
G4B84_000927	80.64	221.52	-1.4635	3.7921e-05	0.00041542	gene-G4B84_000927	-
G4B84_001655	5.03	31.96	-2.696	3.8055e-05	0.00041652	gene-G4B84_001655	-
Novel.1812	160.87	426.76	-1.4105	3.8156e-05	0.00041728	-	-
G4B84_003928	30.15	5.42	2.4876	3.8526e-05	0.00042095	gene-G4B84_003928	-
G4B84_004617	95.37	311.26	-1.7129	3.8795e-05	0.00042353	gene-G4B84_004617	-
Novel.3856	109.29	296.13	-1.4344	3.9266e-05	0.0004283	-	-
G4B84_009165	23.17	141.54	-2.6167	3.9341e-05	0.00042875	gene-G4B84_009165	-
G4B84_011571	151.28	54.83	1.4589	3.9547e-05	0.00043062	gene-G4B84_011571	-
G4B84_003055	82.29	223.22	-1.4471	4.0346e-05	0.00043894	gene-G4B84_003055	-
Novel.7298	134.64	43.2	1.6347	4.0649e-05	0.00044186	-	-
G4B84_008785	1	20.84	-4.3596	4.095e-05	0.00044475	gene-G4B84_008785	-
G4B84_011111	4355.32	2101.14	1.0517	4.1105e-05	0.00044605	gene-G4B84_011111	-
G4B84_000687	13119.7	6290.04	1.0607	4.1205e-05	0.00044675	gene-G4B84_000687	-
G4B84_007943	65.85	19.73	1.7676	4.1733e-05	0.00045209	gene-G4B84_007943	-
G4B84_006332	124.78	315.55	-1.3395	4.1986e-05	0.00045435	gene-G4B84_006332	-
Novel.6731	4892.95	1617.81	1.5968	4.2013e-05	0.00045435	-	-
G4B84_000067	96.91	26.34	1.8833	4.2317e-05	0.00045685	gene-G4B84_000067	-
G4B84_007857	130.9	312.43	-1.2552	4.2315e-05	0.00045685	gene-G4B84_007857	-
G4B84_005438	136.35	324.08	-1.2441	4.2448e-05	0.00045787	gene-G4B84_005438	-
G4B84_004003	7.2	40.92	-2.5718	4.2582e-05	0.00045892	gene-G4B84_004003	-
G4B84_004463	119.13	26.19	2.1631	4.2966e-05	0.00046267	gene-G4B84_004463	-
G4B84_002252	181.45	76.39	1.25	4.3864e-05	0.00047194	gene-G4B84_002252	-
G4B84_007980	56.92	11.82	2.3518	4.4185e-05	0.00047498	gene-G4B84_007980	-
G4B84_010412	3.42	30.9	-3.1686	4.4753e-05	0.00048068	gene-G4B84_010412	-
G4B84_002417	78.96	18.58	2.0557	4.5345e-05	0.00048664	gene-G4B84_002417	-
G4B84_007536	75.99	211.17	-1.4636	4.5446e-05	0.0004873	gene-G4B84_007536	-
G4B84_008790	3.54	32.43	-3.2243	4.5643e-05	0.000489	gene-G4B84_008790	-
G4B84_009195	99.47	29.69	1.7152	4.5706e-05	0.00048926	gene-G4B84_009195	-
G4B84_006418	2507.56	6701.45	-1.4182	4.575e-05	0.00048931	gene-G4B84_006418	-
G4B84_007842	1786.71	6247.98	-1.8061	4.6621e-05	0.00049821	gene-G4B84_007842	-
G4B84_002571	514.4	222.36	1.2092	4.7052e-05	0.0005024	gene-G4B84_002571	-
G4B84_012044	127.5	28.99	2.1566	4.7803e-05	0.00050998	gene-G4B84_012044	-
G4B84_001231	111.5	33.57	1.739	4.8058e-05	0.00051227	gene-G4B84_001231	-
G4B84_001381	101.77	33.16	1.6261	4.8235e-05	0.00051372	gene-G4B84_001381	-
G4B84_007459	33.69	4.37	2.8766	4.8715e-05	0.00051796	gene-G4B84_007459	-
G4B84_011500	0.63	21.71	-5.0091	4.8692e-05	0.00051796	gene-G4B84_011500	-
G4B84_001624	25.9	87.38	-1.7631	4.8897e-05	0.00051946	gene-G4B84_001624	-
G4B84_001854	29.82	104.45	-1.8039	4.8961e-05	0.0005197	gene-G4B84_001854	-
G4B84_004032	24.06	3.38	2.865	4.9794e-05	0.00052766	gene-G4B84_004032	-
G4B84_010712	4.79	29.18	-2.6163	4.9755e-05	0.00052766	gene-G4B84_010712	-
G4B84_008456	117	294.84	-1.3279	5.0389e-05	0.00053352	gene-G4B84_008456	-
G4B84_009728	4194.75	1008.9	2.0545	5.0918e-05	0.00053866	gene-G4B84_009728	-
G4B84_002891	212.15	88.71	1.2546	5.1605e-05	0.00054547	gene-G4B84_002891	-
G4B84_009180	158.42	354.8	-1.1593	5.2868e-05	0.00055836	gene-G4B84_009180	-
G4B84_000347	3510.69	1546.31	1.1833	5.2974e-05	0.00055902	gene-G4B84_000347	-
G4B84_003107	408.2	913.18	-1.1626	5.3466e-05	0.00056373	gene-G4B84_003107	-
G4B84_006232	338.68	144.77	1.2222	5.3754e-05	0.00056582	gene-G4B84_006232	-
G4B84_010779	177.72	63.94	1.4683	5.3719e-05	0.00056582	gene-G4B84_010779	-
Novel.5566	89.74	27.71	1.7224	5.3802e-05	0.00056586	-	-
G4B84_007562	51.68	182.31	-1.8298	5.4709e-05	0.00057472	gene-G4B84_007562	-
G4B84_009950	476.9	999.61	-1.0664	5.4735e-05	0.00057472	gene-G4B84_009950	-
G4B84_000886	9.19	40.43	-2.1612	5.5409e-05	0.00058131	gene-G4B84_000886	-
G4B84_011798	64.81	18.73	1.8063	5.6605e-05	0.00059337	gene-G4B84_011798	-
G4B84_012061	259.59	108.8	1.2627	5.8016e-05	0.00060765	gene-G4B84_012061	-
G4B84_009146	4444.14	1821.94	1.2864	5.8252e-05	0.00060962	gene-G4B84_009146	-
G4B84_007609	609.91	1539.99	-1.3366	5.8559e-05	0.00061232	gene-G4B84_007609	-
G4B84_003863	2095.79	924.62	1.1811	5.8634e-05	0.00061261	gene-G4B84_003863	-
G4B84_009891	119.11	37.65	1.6634	5.8756e-05	0.00061337	gene-G4B84_009891	-
G4B84_009643	1212.76	5144	-2.0852	5.8952e-05	0.00061491	gene-G4B84_009643	-
G4B84_000218	570.75	263.5	1.1171	6.0523e-05	0.00063078	gene-G4B84_000218	-
G4B84_003221	23.11	73.09	-1.6661	6.1292e-05	0.00063774	gene-G4B84_003221	-
G4B84_006997	151.23	388.4	-1.364	6.1386e-05	0.00063819	gene-G4B84_006997	-
G4B84_002677	566.29	1451.78	-1.3595	6.1637e-05	0.00064027	gene-G4B84_002677	-
G4B84_009652	216.77	82.85	1.4021	6.1846e-05	0.00064192	gene-G4B84_009652	-
G4B84_011346	4301.79	10105.9	-1.232	6.2425e-05	0.0006474	gene-G4B84_011346	-
G4B84_009675	4.02	30.52	-2.8572	6.3338e-05	0.00065633	gene-G4B84_009675	-
G4B84_003393	6525.26	1994.45	1.7101	6.3989e-05	0.00066252	gene-G4B84_003393	-
G4B84_007518	2869.77	1273.89	1.1714	6.4772e-05	0.00067009	gene-G4B84_007518	-
G4B84_000400	1.22	19.96	-3.9135	6.6381e-05	0.00068617	gene-G4B84_000400	-
G4B84_000290	432.22	945.77	-1.1302	6.6609e-05	0.00068797	gene-G4B84_000290	-
G4B84_008583	5029.23	1806.18	1.4776	6.6858e-05	0.00068998	gene-G4B84_008583	-
G4B84_001822	85.61	27.87	1.6111	6.6941e-05	0.00069027	gene-G4B84_001822	-
G4B84_008240	272.95	88.56	1.6148	6.7395e-05	0.00069438	gene-G4B84_008240	-
Novel.3822	68.63	13.35	2.3449	6.8094e-05	0.00070101	-	-
G4B84_008155	442.28	926.07	-1.0645	6.8156e-05	0.00070108	gene-G4B84_008155	-
G4B84_000237	2285.98	617.03	1.8891	6.8347e-05	0.00070248	gene-G4B84_000237	-
G4B84_004521	58.35	14.15	2.1063	6.8466e-05	0.00070313	gene-G4B84_004521	-
G4B84_001829	96.03	31.91	1.6038	6.9304e-05	0.00071039	gene-G4B84_001829	-
G4B84_005189	212.77	83.93	1.3465	6.9285e-05	0.00071039	gene-G4B84_005189	-
G4B84_009238	90.78	25.12	1.8163	6.9362e-05	0.00071039	gene-G4B84_009238	-
G4B84_011480	14.59	67.55	-2.2377	6.9398e-05	0.00071039	gene-G4B84_011480	-
G4B84_006343	288.8	611.95	-1.0824	6.9561e-05	0.00071149	gene-G4B84_006343	-
G4B84_002588	430.53	973.49	-1.1785	7.0318e-05	0.00071864	gene-G4B84_002588	-
G4B84_012171	10.87	51.88	-2.2782	7.0392e-05	0.00071882	gene-G4B84_012171	-
G4B84_009229	69.22	203.64	-1.5438	7.1279e-05	0.00072728	gene-G4B84_009229	-
G4B84_000736	5373.84	2576.57	1.0605	7.2114e-05	0.00073447	gene-G4B84_000736	-
G4B84_004098	1176.44	2608.23	-1.1483	7.2157e-05	0.00073447	gene-G4B84_004098	-
G4B84_003754	271.78	618.47	-1.1838	7.3161e-05	0.00074409	gene-G4B84_003754	-
G4B84_007883	4.03	28.07	-2.8627	7.3789e-05	0.0007494	gene-G4B84_007883	-
G4B84_011072	508.12	1640.4	-1.6907	7.3802e-05	0.0007494	gene-G4B84_011072	-
G4B84_004393	10.27	47.83	-2.1929	7.399e-05	0.00075061	gene-G4B84_004393	-
G4B84_004810	92.31	232.28	-1.3332	7.4046e-05	0.00075061	gene-G4B84_004810	-
G4B84_005916	563.64	207.62	1.4352	7.4244e-05	0.00075061	gene-G4B84_005916	-
G4B84_007029	0.43	16.56	-5.4776	7.4108e-05	0.00075061	gene-G4B84_007029	-
G4B84_008185	1049.38	429.84	1.2889	7.4277e-05	0.00075061	gene-G4B84_008185	-
G4B84_009281	19.05	73.18	-1.9054	7.4222e-05	0.00075061	gene-G4B84_009281	-
G4B84_001883	311.41	69.91	2.1548	7.4382e-05	0.00075107	gene-G4B84_001883	-
G4B84_005796	18.24	0.53	4.9524	7.4551e-05	0.00075217	gene-G4B84_005796	-
G4B84_007025	44.35	124.21	-1.4993	7.5776e-05	0.00076374	gene-G4B84_007025	-
G4B84_009885	1059.9	464.92	1.1888	7.5825e-05	0.00076374	gene-G4B84_009885	-
Novel.3631	5.73	31.93	-2.4586	7.5879e-05	0.00076374	-	-
G4B84_009066	1311.56	623.14	1.0733	7.6447e-05	0.00076885	gene-G4B84_009066	-
G4B84_001677	341.32	1112.52	-1.7066	7.7566e-05	0.00077949	gene-G4B84_001677	-
G4B84_006070	22.73	134.94	-2.5783	7.7654e-05	0.00077974	gene-G4B84_006070	-
G4B84_001099	475.21	1383.85	-1.543	7.7733e-05	0.00077992	gene-G4B84_001099	-
G4B84_005821	45.24	116.92	-1.3671	7.8159e-05	0.00078357	gene-G4B84_005821	-
G4B84_004547	282.06	640.75	-1.1837	7.8768e-05	0.00078905	gene-G4B84_004547	-
G4B84_007872	182.01	71.42	1.3624	7.9393e-05	0.00079468	gene-G4B84_007872	-
G4B84_005775	67.09	18.65	1.873	8.0396e-05	0.00080409	gene-G4B84_005775	-
G4B84_007613	699.43	1559.45	-1.1568	8.0669e-05	0.00080618	gene-G4B84_007613	-
G4B84_011458	0.79	19.48	-4.3414	8.0768e-05	0.00080653	gene-G4B84_011458	-
G4B84_011968	3995.45	10278.9	-1.3634	8.14e-05	0.0008122	gene-G4B84_011968	-
G4B84_004565	12.76	62.62	-2.2637	8.1912e-05	0.00081666	gene-G4B84_004565	-
G4B84_004954	111.65	363.67	-1.6982	8.3413e-05	0.00083067	gene-G4B84_004954	-
G4B84_010230	114.51	27.28	2.0715	8.3449e-05	0.00083067	gene-G4B84_010230	-
G4B84_000263	91.45	214.86	-1.2304	8.3655e-05	0.00083208	gene-G4B84_000263	-
G4B84_002475	83.36	21.36	1.9236	8.3792e-05	0.00083278	gene-G4B84_002475	-
G4B84_006305	13.92	82.54	-2.5865	8.4088e-05	0.00083507	gene-G4B84_006305	-
G4B84_001718	32.97	0.53	5.8147	8.441e-05	0.00083761	gene-G4B84_001718	-
G4B84_011341	5.16	34.81	-2.7961	8.4863e-05	0.00084144	gene-G4B84_011341	-
G4B84_005606	488.15	139.2	1.8075	8.5175e-05	0.00084387	gene-G4B84_005606	-
G4B84_005623	444.4	132.9	1.7372	8.6549e-05	0.00085682	gene-G4B84_005623	-
G4B84_009940	47.89	218.63	-2.1989	8.7087e-05	0.00086147	gene-G4B84_009940	-
G4B84_004317	147.28	2313.14	-3.9744	8.7539e-05	0.00086526	gene-G4B84_004317	-
G4B84_003249	1024.45	392.59	1.3849	8.7935e-05	0.00086849	gene-G4B84_003249	-
G4B84_011705	43.55	186.09	-2.1129	8.8444e-05	0.00087284	gene-G4B84_011705	-
G4B84_002823	93.63	21.34	2.1347	8.8758e-05	0.00087526	gene-G4B84_002823	-
Novel.4840	49.3	177.31	-1.8577	8.9996e-05	0.0008861	-	-
Novel.6654	0.37	16.38	-5.4468	8.9998e-05	0.0008861	-	-
G4B84_000705	135253	50922.1	1.4093	9.048e-05	0.00089015	gene-G4B84_000705	-
G4B84_011110	1055.7	519.29	1.024	9.138e-05	0.00089831	gene-G4B84_011110	-
G4B84_001801	425.7	129.68	1.7125	9.2152e-05	0.00090449	gene-G4B84_001801	-
G4B84_011632	325.86	145.97	1.1566	9.2093e-05	0.00090449	gene-G4B84_011632	-
G4B84_006381	70.39	203.26	-1.5397	9.3922e-05	0.00092115	gene-G4B84_006381	-
G4B84_000626	94091.9	40550.9	1.2143	9.4176e-05	0.00092292	gene-G4B84_000626	-
G4B84_010659	2427.52	1119.9	1.1165	9.5926e-05	0.00093934	gene-G4B84_010659	-
Novel.901	1822.66	774.68	1.235	9.649e-05	0.00094414	-	-
G4B84_000625	3830.22	10924.2	-1.5121	9.6738e-05	0.00094583	gene-G4B84_000625	-
G4B84_009242	8.75	69.91	-2.9499	9.7467e-05	0.00095222	gene-G4B84_009242	-
G4B84_007628	15433.8	4889.79	1.6583	9.8188e-05	0.00095852	gene-G4B84_007628	-
G4B84_005105	5.67	31.63	-2.505	9.8732e-05	0.00096309	gene-G4B84_005105	-
Novel.639	113.76	36.82	1.6142	9.8897e-05	0.00096396	-	-
G4B84_009389	9.38	49.35	-2.4033	9.8995e-05	0.00096418	gene-G4B84_009389	-
G4B84_007272	1194.56	2824.19	-1.2414	9.9485e-05	0.00096819	gene-G4B84_007272	-
G4B84_006846	24.01	87.97	-1.8962	0.00010103	0.00098174	gene-G4B84_006846	-
G4B84_007488	144.87	443.64	-1.6196	0.00010531	0.0010225	gene-G4B84_007488	-
G4B84_009317	868.8	2994.23	-1.786	0.00010598	0.0010283	gene-G4B84_009317	-
G4B84_008729	36.57	173.56	-2.26	0.00010623	0.0010298	gene-G4B84_008729	-
G4B84_001605	84.46	224.05	-1.4076	0.00010811	0.0010463	gene-G4B84_001605	-
G4B84_001850	1852.79	24.25	6.256	0.00010817	0.0010463	gene-G4B84_001850	-
G4B84_006415	17.12	61.35	-1.8417	0.00010817	0.0010463	gene-G4B84_006415	-
G4B84_012266	16.02	69.21	-2.1433	0.00010829	0.0010467	gene-G4B84_012266	-
G4B84_003613	1826.17	860.48	1.086	0.00010929	0.0010531	gene-G4B84_003613	-
G4B84_003664	3.25	25.48	-2.9421	0.00010921	0.0010531	gene-G4B84_003664	-
G4B84_006139	986.19	2114.79	-1.1008	0.00010925	0.0010531	gene-G4B84_006139	-
G4B84_011167	29.19	4.29	2.7551	0.0001092	0.0010531	gene-G4B84_011167	-
Novel.8005	266.63	626.3	-1.235	0.00011039	0.0010628	-	-
G4B84_006766	98.91	218.15	-1.1452	0.00011056	0.0010637	gene-G4B84_006766	-
G4B84_004710	100.68	33.76	1.5639	0.00011085	0.0010657	gene-G4B84_004710	-
G4B84_006559	1685.94	810.81	1.056	0.00011259	0.0010816	gene-G4B84_006559	-
Novel.8741	736.47	340.04	1.1133	0.00011275	0.0010823	-	-
G4B84_008202	301.77	707.95	-1.2278	0.00011302	0.0010841	gene-G4B84_008202	-
G4B84_001274	109.67	397.04	-1.8513	0.0001139	0.0010917	gene-G4B84_001274	-
G4B84_001707	118.83	319.41	-1.4265	0.00011425	0.0010942	gene-G4B84_001707	-
G4B84_002718	313.69	128.92	1.282	0.00011468	0.0010975	gene-G4B84_002718	-
G4B84_010489	21.12	64.94	-1.6344	0.00011563	0.0011058	gene-G4B84_010489	-
G4B84_001524	92.22	268.55	-1.5403	0.00011613	0.0011097	gene-G4B84_001524	-
G4B84_003115	71.67	309.66	-2.1147	0.00011723	0.0011193	gene-G4B84_003115	-
G4B84_002521	829.5	401.22	1.0469	0.00011778	0.0011229	gene-G4B84_002521	-
G4B84_009262	70.76	14.61	2.3365	0.00011776	0.0011229	gene-G4B84_009262	-
G4B84_003819	768.27	1455.56	-0.9217	0.00011896	0.001131	gene-G4B84_003819	-
G4B84_004075	15.78	61.67	-1.9847	0.00011882	0.001131	gene-G4B84_004075	-
G4B84_006831	289.17	103.84	1.4822	0.00011881	0.001131	gene-G4B84_006831	-
G4B84_007106	80.83	184.1	-1.1877	0.00011899	0.001131	gene-G4B84_007106	-
Novel.5572	9.14	43.65	-2.3051	0.00012073	0.0011467	-	-
G4B84_003240	31.1	98.44	-1.6703	0.00012149	0.0011531	gene-G4B84_003240	-
G4B84_003946	770.59	1743.4	-1.1764	0.00012193	0.0011564	gene-G4B84_003946	-
G4B84_004363	76.98	22.48	1.8237	0.00012224	0.0011585	gene-G4B84_004363	-
G4B84_000711	150.45	62.6	1.2688	0.00012262	0.0011612	gene-G4B84_000711	-
G4B84_009997	55.96	9.91	2.4839	0.00012312	0.001165	gene-G4B84_009997	-
G4B84_000549	26468.6	10277.7	1.3648	0.00012349	0.0011677	gene-G4B84_000549	-
G4B84_004140	21.94	2.27	3.3199	0.00012554	0.0011862	gene-G4B84_004140	-
G4B84_000459	355.32	78.78	2.1709	0.00012696	0.0011987	gene-G4B84_000459	-
G4B84_006734	356.18	889.12	-1.321	0.00012784	0.0012061	gene-G4B84_006734	-
G4B84_007012	10981.9	5291.71	1.0535	0.00012847	0.0012108	gene-G4B84_007012	-
Novel.295	17.06	68.29	-2.0066	0.00012853	0.0012108	-	-
G4B84_003362	481.16	199.19	1.2749	0.00012919	0.0012161	gene-G4B84_003362	-
G4B84_010686	632.61	165.92	1.9313	0.00012931	0.0012164	gene-G4B84_010686	-
G4B84_001922	157.57	441.19	-1.4886	0.00012941	0.0012164	gene-G4B84_001922	-
G4B84_003689	75.37	189.36	-1.327	0.0001303	0.0012238	gene-G4B84_003689	-
G4B84_010347	42.93	8.37	2.331	0.00013092	0.0012287	gene-G4B84_010347	-
G4B84_006195	199.06	82.97	1.2553	0.00013118	0.0012303	gene-G4B84_006195	-
G4B84_002501	116428	33154.4	1.8122	0.00013258	0.0012424	gene-G4B84_002501	-
G4B84_011965	53298.5	17241.5	1.6282	0.00013346	0.0012497	gene-G4B84_011965	-
G4B84_008208	604.15	287.68	1.0708	0.00013382	0.0012523	gene-G4B84_008208	-
G4B84_004094	6.67	38.59	-2.5074	0.00013434	0.0012553	gene-G4B84_004094	-
G4B84_011293	722.17	290.74	1.3121	0.00013426	0.0012553	gene-G4B84_011293	-
G4B84_011294	35.21	110.4	-1.6648	0.00013489	0.0012595	gene-G4B84_011294	-
G4B84_009192	147.79	58.95	1.3359	0.00013612	0.00127	gene-G4B84_009192	-
G4B84_003473	28.87	83.06	-1.5241	0.00013651	0.0012727	gene-G4B84_003473	-
G4B84_003780	154.72	376.95	-1.2884	0.00013673	0.0012738	gene-G4B84_003780	-
G4B84_011488	43.44	127.24	-1.5559	0.0001385	0.0012894	gene-G4B84_011488	-
G4B84_001106	191.26	521.31	-1.4491	0.00013879	0.001291	gene-G4B84_001106	-
G4B84_003392	533.18	239.97	1.1518	0.0001394	0.0012958	gene-G4B84_003392	-
G4B84_003860	58.15	18.63	1.6334	0.00013979	0.0012985	gene-G4B84_003860	-
G4B84_008860	177.48	436.17	-1.2969	0.00014005	0.0012999	gene-G4B84_008860	-
G4B84_011648	167.3	422.55	-1.3347	0.00014053	0.0013035	gene-G4B84_011648	-
G4B84_000509	460.86	1463.39	-1.669	0.00014141	0.0013106	gene-G4B84_000509	-
G4B84_010722	417.45	176.47	1.2368	0.00014261	0.0013207	gene-G4B84_010722	-
G4B84_011489	70.55	216.16	-1.6241	0.00014366	0.0013295	gene-G4B84_011489	-
G4B84_010587	2113.37	530.4	1.9941	0.00014578	0.0013482	gene-G4B84_010587	-
G4B84_001641	204.31	434.84	-1.0927	0.00014612	0.0013504	gene-G4B84_001641	-
G4B84_001926	145.7	421.71	-1.5285	0.00014642	0.0013512	gene-G4B84_001926	-
G4B84_007066	142.95	365.64	-1.3521	0.00014641	0.0013512	gene-G4B84_007066	-
G4B84_006137	28.83	80.4	-1.4699	0.00014691	0.0013547	gene-G4B84_006137	-
G4B84_011028	42.18	123.31	-1.5432	0.00014749	0.001359	gene-G4B84_011028	-
G4B84_000359	3823.43	8847.31	-1.2106	0.00014781	0.001361	gene-G4B84_000359	-
G4B84_006034	14.49	55.42	-1.9257	0.00014925	0.0013722	gene-G4B84_006034	-
G4B84_010825	1156.94	2300.98	-0.9911	0.00014917	0.0013722	gene-G4B84_010825	-
G4B84_011881	252.1	656.52	-1.3764	0.00015127	0.0013898	gene-G4B84_011881	-
G4B84_000128	824.01	2855.17	-1.7913	0.00015166	0.0013924	gene-G4B84_000128	-
G4B84_000752	24.76	3.88	2.6665	0.00015257	0.0013997	gene-G4B84_000752	-
G4B84_004482	9144.64	25817.6	-1.4974	0.0001558	0.0014283	gene-G4B84_004482	-
G4B84_008076	3.09	22.42	-2.8679	0.00015694	0.0014377	gene-G4B84_008076	-
G4B84_004714	2357.77	6413.45	-1.4434	0.00015792	0.0014446	gene-G4B84_004714	-
G4B84_006497	6.4	35.49	-2.4657	0.00015792	0.0014446	gene-G4B84_006497	-
G4B84_007273	86.59	207.83	-1.2577	0.00015892	0.0014526	gene-G4B84_007273	-
G4B84_004374	162.56	60.69	1.4272	0.00015942	0.0014562	gene-G4B84_004374	-
G4B84_008229	321.66	152.23	1.0843	0.00015987	0.0014592	gene-G4B84_008229	-
G4B84_003708	949.52	210.72	2.1727	0.00016073	0.001466	gene-G4B84_003708	-
Novel.2341	27.99	5.04	2.6103	0.0001609	0.0014665	-	-
G4B84_012273	236.39	835.24	-1.8249	0.0001621	0.0014765	gene-G4B84_012273	-
G4B84_004444	49.64	11.23	2.1349	0.00016501	0.0015013	gene-G4B84_004444	-
G4B84_006646	8.16	39.27	-2.2055	0.00016507	0.0015013	gene-G4B84_006646	-
G4B84_010565	3882.28	11341.2	-1.5468	0.00016638	0.0015121	gene-G4B84_010565	-
G4B84_010537	657.26	32.69	4.3264	0.00016818	0.0015274	gene-G4B84_010537	-
G4B84_010075	34.72	96.46	-1.472	0.00017122	0.0015539	gene-G4B84_010075	-
G4B84_008601	3555.66	1696.96	1.0672	0.00017364	0.0015747	gene-G4B84_008601	-
G4B84_001751	13.76	60.15	-2.1133	0.00017443	0.0015808	gene-G4B84_001751	-
G4B84_003298	1122.63	2395.2	-1.0937	0.00017463	0.0015814	gene-G4B84_003298	-
G4B84_003390	1360.5	499.59	1.4461	0.0001751	0.0015846	gene-G4B84_003390	-
G4B84_003034	3120.99	1186.26	1.3953	0.0001756	0.001588	gene-G4B84_003034	-
G4B84_008497	3408.27	8715.69	-1.3545	0.00017718	0.001601	gene-G4B84_008497	-
G4B84_006662	136.3	54.44	1.3345	0.00017848	0.0016117	gene-G4B84_006662	-
G4B84_006368	1708.13	862.55	0.9863	0.00017901	0.0016153	gene-G4B84_006368	-
G4B84_003254	326.95	160.62	1.0269	0.0001796	0.0016181	gene-G4B84_003254	-
G4B84_007893	157.58	330.74	-1.0721	0.0001797	0.0016181	gene-G4B84_007893	-
G4B84_010943	1576.2	654.99	1.2679	0.00017964	0.0016181	gene-G4B84_010943	-
G4B84_012115	401.4	144.41	1.4786	0.00017992	0.0016189	gene-G4B84_012115	-
G4B84_006524	148.25	326.17	-1.1382	0.0001802	0.0016203	gene-G4B84_006524	-
G4B84_006886	2.07	19.07	-3.2194	0.00018099	0.0016262	gene-G4B84_006886	-
G4B84_007601	291.92	658.19	-1.1739	0.00018126	0.0016275	gene-G4B84_007601	-
G4B84_001452	560.33	1183.78	-1.0805	0.00018174	0.0016306	gene-G4B84_001452	-
G4B84_005603	1955.64	585.01	1.7407	0.00018194	0.0016313	gene-G4B84_005603	-
G4B84_011553	442.6	883.42	-0.9968	0.00018223	0.0016327	gene-G4B84_011553	-
Novel.783	12.2	53.64	-2.1409	0.00018236	0.0016327	-	-
G4B84_004961	15.27	50.25	-1.7174	0.00018281	0.0016356	gene-G4B84_004961	-
G4B84_000795	309.02	654.84	-1.0835	0.00018426	0.0016452	gene-G4B84_000795	-
G4B84_005259	70.84	162.81	-1.1945	0.00018425	0.0016452	gene-G4B84_005259	-
G4B84_009451	54.08	150.86	-1.464	0.00018427	0.0016452	gene-G4B84_009451	-
Novel.5145	217.38	90.72	1.2608	0.00018442	0.0016453	-	-
G4B84_001743	2059.38	4916.05	-1.2554	0.00018469	0.0016458	gene-G4B84_001743	-
G4B84_003709	20.95	64.2	-1.6066	0.00018474	0.0016458	gene-G4B84_003709	-
G4B84_002889	2686.74	1324.45	1.0207	0.00018801	0.0016738	gene-G4B84_002889	-
G4B84_006977	4.71	30.45	-2.6571	0.00018869	0.0016787	gene-G4B84_006977	-
G4B84_004283	288.51	109.83	1.4004	0.00018891	0.0016795	gene-G4B84_004283	-
Novel.889	281	121.98	1.2132	0.00019005	0.0016884	-	-
G4B84_003463	61.89	178.31	-1.5149	0.00019476	0.001729	gene-G4B84_003463	-
G4B84_000313	190.97	549.09	-1.5258	0.00019533	0.0017328	gene-G4B84_000313	-
G4B84_007649	1755.43	4493.48	-1.3563	0.00019556	0.0017337	gene-G4B84_007649	-
G4B84_005451	258.24	937.53	-1.862	0.00019622	0.0017383	gene-G4B84_005451	-
G4B84_003973	1702.16	4600.7	-1.4349	0.00019651	0.0017397	gene-G4B84_003973	-
G4B84_004654	184.52	496.53	-1.4252	0.00019851	0.0017562	gene-G4B84_004654	-
G4B84_000245	691.78	297.49	1.2191	0.00019997	0.0017679	gene-G4B84_000245	-
G4B84_006895	1083.37	516.52	1.0684	0.00020105	0.0017761	gene-G4B84_006895	-
G4B84_004524	403.9	965.79	-1.2567	0.00020298	0.0017919	gene-G4B84_004524	-
Novel.5130	557.69	255.35	1.1281	0.0002034	0.0017944	-	-
G4B84_005930	29.91	5.83	2.3784	0.00020523	0.0018093	gene-G4B84_005930	-
G4B84_009333	384.06	115.83	1.7271	0.00020672	0.0018211	gene-G4B84_009333	-
G4B84_007903	11.31	49.43	-2.0699	0.00020691	0.0018216	gene-G4B84_007903	-
G4B84_007652	74.98	240.15	-1.6848	0.0002094	0.0018422	gene-G4B84_007652	-
G4B84_006200	28.06	5.13	2.4197	0.00021253	0.0018684	gene-G4B84_006200	-
G4B84_006448	19.46	72.67	-1.8931	0.00021271	0.0018687	gene-G4B84_006448	-
G4B84_007688	221.98	97.93	1.1725	0.00021324	0.0018721	gene-G4B84_007688	-
G4B84_006697	80.53	21.26	1.9223	0.00021485	0.0018849	gene-G4B84_006697	-
G4B84_011290	39.33	118.53	-1.5912	0.00021572	0.0018912	gene-G4B84_011290	-
G4B84_001463	368.16	753.84	-1.0355	0.00021618	0.0018939	gene-G4B84_001463	-
Novel.326	2395.42	1021.61	1.2299	0.00021713	0.0019009	-	-
G4B84_009904	4980.84	2363.55	1.0752	0.00022064	0.0019303	gene-G4B84_009904	-
G4B84_004635	46.31	143.46	-1.6191	0.00022092	0.0019314	gene-G4B84_004635	-
G4B84_008009	5205.96	14271.9	-1.455	0.00022287	0.0019471	gene-G4B84_008009	-
G4B84_000164	4613.26	2006.5	1.2013	0.00022343	0.0019507	gene-G4B84_000164	-
G4B84_010410	747.28	1669.78	-1.1612	0.00022571	0.0019693	gene-G4B84_010410	-
G4B84_010651	221.43	510.32	-1.2081	0.0002286	0.0019931	gene-G4B84_010651	-
Novel.667	110.27	42.99	1.364	0.00022878	0.0019933	-	-
G4B84_004753	2036.91	891.56	1.192	0.00022919	0.0019954	gene-G4B84_004753	-
Novel.7315	21.52	69.98	-1.7158	0.00023117	0.0020113	-	-
G4B84_000676	34.87	102.76	-1.5567	0.00023194	0.0020167	gene-G4B84_000676	-
G4B84_008596	344.04	713.94	-1.0542	0.00023296	0.0020241	gene-G4B84_008596	-
G4B84_003882	77.13	227.62	-1.5682	0.00023452	0.0020363	gene-G4B84_003882	-
G4B84_007145	0	9.91	-5.703	0.00023537	0.0020423	gene-G4B84_007145	-
G4B84_008151	267.52	572.39	-1.0935	0.00023597	0.002046	gene-G4B84_008151	-
G4B84_001530	661.2	1278.38	-0.9505	0.00023724	0.0020534	gene-G4B84_001530	-
G4B84_003839	1496.3	3587.39	-1.2618	0.0002373	0.0020534	gene-G4B84_003839	-
G4B84_010900	0	11.87	-5.9619	0.00023728	0.0020534	gene-G4B84_010900	-
G4B84_003177	225.7	452.74	-1.0019	0.00023833	0.0020608	gene-G4B84_003177	-
G4B84_009232	798.56	1577.23	-0.9823	0.00023942	0.0020689	gene-G4B84_009232	-
G4B84_011428	9.47	0	5.7602	0.00023979	0.0020707	gene-G4B84_011428	-
G4B84_009323	747.24	2516.8	-1.7524	0.00024026	0.0020733	gene-G4B84_009323	-
G4B84_000103	18546.8	41899.2	-1.1758	0.00024166	0.0020825	gene-G4B84_000103	-
G4B84_008574	2797.26	6140.16	-1.1345	0.0002415	0.0020825	gene-G4B84_008574	-
G4B84_003044	1230.27	3223.68	-1.3902	0.00024382	0.0020993	gene-G4B84_003044	-
G4B84_012065	17.72	0.64	4.8187	0.00024394	0.0020993	gene-G4B84_012065	-
G4B84_000749	4200.6	1991.17	1.0775	0.00024422	0.0021003	gene-G4B84_000749	-
G4B84_006515	141.3	380.33	-1.4285	0.00024708	0.0021234	gene-G4B84_006515	-
G4B84_001961	448	163.34	1.4526	0.00024756	0.0021261	gene-G4B84_001961	-
G4B84_011381	112.86	265.36	-1.2331	0.0002496	0.0021422	gene-G4B84_011381	-
G4B84_004219	4.12	26.03	-2.609	0.00025042	0.0021478	gene-G4B84_004219	-
Novel.912	127.16	36.52	1.8219	0.00025361	0.0021737	-	-
G4B84_007294	59.3	17.37	1.788	0.00025414	0.0021768	gene-G4B84_007294	-
G4B84_005980	1.6	18.04	-3.6442	0.00025649	0.0021953	gene-G4B84_005980	-
G4B84_010122	0.87	17.83	-4.6198	0.00025901	0.0022154	gene-G4B84_010122	-
G4B84_007082	1014.9	2405.23	-1.2455	0.00026095	0.0022305	gene-G4B84_007082	-
G4B84_008420	344.56	689.02	-1.001	0.00026392	0.0022543	gene-G4B84_008420	-
G4B84_003867	1523.14	376.4	2.0156	0.00026615	0.0022719	gene-G4B84_003867	-
G4B84_003391	140.33	53.71	1.3924	0.00026771	0.0022836	gene-G4B84_003391	-
G4B84_002415	17955	5046.28	1.831	0.00026994	0.0023011	gene-G4B84_002415	-
G4B84_002548	227.89	86.9	1.3859	0.00027054	0.0023047	gene-G4B84_002548	-
G4B84_010353	0	9.44	-5.6123	0.00027157	0.0023119	gene-G4B84_010353	-
G4B84_000668	417.99	137.36	1.6118	0.00027335	0.0023255	gene-G4B84_000668	-
G4B84_010566	59.22	156.5	-1.4087	0.0002745	0.0023337	gene-G4B84_010566	-
G4B84_003218	1167.23	572.27	1.0273	0.00027643	0.002347	gene-G4B84_003218	-
G4B84_008617	3616.33	7718.85	-1.094	0.00027634	0.002347	gene-G4B84_008617	-
G4B84_000455	18.66	60.98	-1.7213	0.0002776	0.0023522	gene-G4B84_000455	-
G4B84_001108	134.02	459.89	-1.7813	0.00027737	0.0023522	gene-G4B84_001108	-
G4B84_003176	326.44	921.09	-1.4995	0.00027758	0.0023522	gene-G4B84_003176	-
G4B84_003394	7502.97	2928.94	1.3573	0.00028109	0.0023801	gene-G4B84_003394	-
G4B84_007977	440.64	161.77	1.441	0.00028132	0.0023805	gene-G4B84_007977	-
G4B84_003655	35.82	103.65	-1.5374	0.00028274	0.0023909	gene-G4B84_003655	-
G4B84_002550	692.2	294.97	1.2297	0.00028302	0.0023917	gene-G4B84_002550	-
G4B84_010735	744.71	398.06	0.9035	0.00028789	0.0024312	gene-G4B84_010735	-
G4B84_000758	12.38	57.88	-2.2043	0.00028853	0.002434	gene-G4B84_000758	-
Novel.4929	878.2	2042.74	-1.2179	0.00028861	0.002434	-	-
G4B84_009756	654.56	308.91	1.0832	0.00028938	0.0024389	gene-G4B84_009756	-
G4B84_010291	189.51	36.46	2.3735	0.00028985	0.0024412	gene-G4B84_010291	-
G4B84_002669	1261.69	3375.58	-1.4205	0.00029021	0.0024427	gene-G4B84_002669	-
Novel.3100	11.73	43.21	-1.8907	0.00029069	0.0024451	-	-
G4B84_006622	76.65	19.97	1.9484	0.00029115	0.0024458	gene-G4B84_006622	-
G4B84_010956	1422.76	670.5	1.0861	0.00029117	0.0024458	gene-G4B84_010956	-
G4B84_011855	38.67	122.82	-1.6812	0.00029287	0.0024584	gene-G4B84_011855	-
G4B84_009674	0.53	16.11	-4.6211	0.00029511	0.0024757	gene-G4B84_009674	-
Novel.5728	113.8	27.38	2.0482	0.00029638	0.0024846	-	-
G4B84_009480	1031.81	2136.56	-1.05	0.00029666	0.0024853	gene-G4B84_009480	-
G4B84_006686	9869.75	4342.3	1.1846	0.00029841	0.0024983	gene-G4B84_006686	-
G4B84_000073	27038.7	7996.82	1.7576	0.00030069	0.0025153	gene-G4B84_000073	-
G4B84_005115	381.09	186.47	1.0327	0.00030083	0.0025153	gene-G4B84_005115	-
G4B84_003004	153.2	366.91	-1.2555	0.00030178	0.0025215	gene-G4B84_003004	-
G4B84_012081	50.76	15.39	1.714	0.00030333	0.0025328	gene-G4B84_012081	-
G4B84_007716	76.79	201.62	-1.403	0.00030492	0.0025444	gene-G4B84_007716	-
G4B84_006981	1601.12	3704.43	-1.2103	0.00030615	0.002553	gene-G4B84_006981	-
G4B84_008582	32.48	7.23	2.2006	0.00030925	0.0025771	gene-G4B84_008582	-
G4B84_006169	314.62	621.33	-0.9811	0.00031013	0.0025828	gene-G4B84_006169	-
G4B84_003835	7.57	34.64	-2.1561	0.00031043	0.0025835	gene-G4B84_003835	-
G4B84_002950	1051.7	3092.8	-1.5567	0.00031107	0.0025872	gene-G4B84_002950	-
G4B84_008821	12.66	47.19	-1.9011	0.00031271	0.0025991	gene-G4B84_008821	-
Novel.371	488.03	206.33	1.2441	0.00031416	0.0026095	-	-
G4B84_008028	21.46	66.06	-1.6455	0.00031597	0.0026228	gene-G4B84_008028	-
G4B84_008820	1.07	16.98	-4.0197	0.00032004	0.0026531	gene-G4B84_008820	-
G4B84_011557	2401.01	1195.98	1.0053	0.00031988	0.0026531	gene-G4B84_011557	-
G4B84_001533	5437.22	1952.17	1.4775	0.00032093	0.0026587	gene-G4B84_001533	-
G4B84_004203	530.52	234.96	1.1791	0.00032136	0.0026605	gene-G4B84_004203	-
G4B84_012031	1.76	16.91	-3.2955	0.00032385	0.0026794	gene-G4B84_012031	-
G4B84_004281	717.6	210.57	1.7689	0.00032554	0.0026916	gene-G4B84_004281	-
G4B84_005704	5.8	29.02	-2.3781	0.00032842	0.0027136	gene-G4B84_005704	-
G4B84_001481	82.57	32.01	1.3609	0.00033074	0.002731	gene-G4B84_001481	-
G4B84_010350	2846.01	1310.65	1.1194	0.00033568	0.00277	gene-G4B84_010350	-
G4B84_009239	107.01	42.29	1.3346	0.00033646	0.0027747	gene-G4B84_009239	-
G4B84_000889	244.96	592.16	-1.2748	0.00033755	0.0027818	gene-G4B84_000889	-
G4B84_011674	2523.96	999.45	1.3371	0.00033928	0.0027942	gene-G4B84_011674	-
G4B84_002751	30.47	134.32	-2.1289	0.00034282	0.0028197	gene-G4B84_002751	-
G4B84_011875	264.61	99.96	1.3983	0.00034264	0.0028197	gene-G4B84_011875	-
G4B84_004296	60.64	17.61	1.7715	0.00034331	0.0028219	gene-G4B84_004296	-
G4B84_002336	18.06	57.09	-1.6587	0.00034381	0.0028238	gene-G4B84_002336	-
Novel.4181	4885.33	2276.64	1.1017	0.00034399	0.0028238	-	-
G4B84_003758	365.99	138.44	1.4028	0.00034507	0.0028295	gene-G4B84_003758	-
G4B84_009644	33.68	100.07	-1.5871	0.00034512	0.0028295	gene-G4B84_009644	-
G4B84_000508	131.95	342.52	-1.3695	0.00034629	0.0028368	gene-G4B84_000508	-
Novel.3389	12.57	45.32	-1.8874	0.00034647	0.0028368	-	-
G4B84_009252	72.82	13.52	2.4151	0.00034835	0.0028504	gene-G4B84_009252	-
G4B84_002725	513.6	1058.1	-1.0423	0.00035014	0.0028632	gene-G4B84_002725	-
G4B84_010760	78.36	262.04	-1.7401	0.00035214	0.0028776	gene-G4B84_010760	-
G4B84_003864	246.22	635.78	-1.3655	0.00035645	0.002911	gene-G4B84_003864	-
G4B84_012049	58.85	16.24	1.8328	0.00035683	0.0029122	gene-G4B84_012049	-
G4B84_010380	5297.38	1937.19	1.4516	0.00035955	0.0029326	gene-G4B84_010380	-
G4B84_001284	12.8	46.71	-1.9104	0.00036093	0.0029412	gene-G4B84_001284	-
G4B84_002126	49.43	9.85	2.2978	0.00036131	0.0029412	gene-G4B84_002126	-
G4B84_004602	62.78	18.4	1.7399	0.00036112	0.0029412	gene-G4B84_004602	-
G4B84_007776	192.73	59.8	1.6777	0.00036302	0.0029532	gene-G4B84_007776	-
G4B84_010074	27.32	94.11	-1.7939	0.00036865	0.0029971	gene-G4B84_010074	-
G4B84_008107	864.76	406.55	1.0904	0.00037033	0.0030088	gene-G4B84_008107	-
G4B84_003378	7.45	39.06	-2.4065	0.00037082	0.0030109	gene-G4B84_003378	-
G4B84_000953	56.75	158.1	-1.4915	0.00037364	0.0030279	gene-G4B84_000953	-
G4B84_008776	43.32	11.69	1.8976	0.00037344	0.0030279	gene-G4B84_008776	-
G4B84_008796	239.39	61.07	1.9566	0.00037341	0.0030279	gene-G4B84_008796	-
G4B84_009137	284.77	1012.12	-1.8307	0.00037413	0.0030285	gene-G4B84_009137	-
G4B84_011435	40.14	10.35	1.9009	0.00037419	0.0030285	gene-G4B84_011435	-
G4B84_008397	3031.54	7283.07	-1.2647	0.00037523	0.0030349	gene-G4B84_008397	-
G4B84_006270	18.34	108.97	-2.6056	0.00037983	0.0030702	gene-G4B84_006270	-
G4B84_005046	296.6	597.06	-1.0061	0.00038018	0.0030711	gene-G4B84_005046	-
G4B84_002053	1255.3	4185.8	-1.7379	0.00038099	0.0030757	gene-G4B84_002053	-
G4B84_004432	544.15	1636.01	-1.5894	0.00038343	0.0030934	gene-G4B84_004432	-
G4B84_007393	314.16	104.51	1.5899	0.00038521	0.0031058	gene-G4B84_007393	-
G4B84_006643	365.49	156.24	1.2319	0.00038742	0.0031216	gene-G4B84_006643	-
G4B84_000462	618.59	223.28	1.4718	0.00039002	0.0031405	gene-G4B84_000462	-
G4B84_002396	33.72	7.93	2.0958	0.00039041	0.0031417	gene-G4B84_002396	-
G4B84_000390	217.46	76.25	1.5058	0.00039285	0.0031593	gene-G4B84_000390	-
G4B84_012024	106.68	29.95	1.824	0.00039812	0.0031997	gene-G4B84_012024	-
G4B84_002370	0	8.54	-5.4913	0.00040146	0.0032244	gene-G4B84_002370	-
G4B84_004383	9368.56	4104.63	1.1909	0.00040182	0.0032253	gene-G4B84_004383	-
G4B84_006562	1759.41	5103.79	-1.5369	0.00040413	0.0032418	gene-G4B84_006562	-
G4B84_001185	6.36	28.98	-2.1857	0.00040469	0.0032442	gene-G4B84_001185	-
G4B84_002563	657.9	1403.98	-1.0938	0.0004061	0.0032514	gene-G4B84_002563	-
G4B84_006009	23.5	70.84	-1.6159	0.0004059	0.0032514	gene-G4B84_006009	-
G4B84_001540	1004.67	3494.68	-1.7987	0.00040723	0.0032584	gene-G4B84_001540	-
G4B84_010421	87.82	27.2	1.7014	0.00040785	0.0032613	gene-G4B84_010421	-
G4B84_009594	703.46	369.05	0.9326	0.00040843	0.0032638	gene-G4B84_009594	-
G4B84_005332	932.15	2937.65	-1.6564	0.00040955	0.0032707	gene-G4B84_005332	-
G4B84_007117	4.33	23.4	-2.4705	0.00041051	0.0032763	gene-G4B84_007117	-
G4B84_008145	212.86	92.16	1.2066	0.00041117	0.0032795	gene-G4B84_008145	-
G4B84_003178	981.92	2038.97	-1.0544	0.00041413	0.003301	gene-G4B84_003178	-
G4B84_001594	968.45	468.46	1.0477	0.00041778	0.003328	gene-G4B84_001594	-
G4B84_005634	5696.62	12343.1	-1.1157	0.00041823	0.0033295	gene-G4B84_005634	-
G4B84_010621	22.87	2.62	3.1481	0.00041911	0.0033344	gene-G4B84_010621	-
G4B84_000931	489.53	217.8	1.1688	0.00042109	0.0033481	gene-G4B84_000931	-
Novel.4434	7.62	37.82	-2.3557	0.00042214	0.0033543	-	-
G4B84_006544	211.94	85.04	1.3158	0.0004248	0.0033733	gene-G4B84_006544	-
G4B84_001402	280	558.04	-0.9969	0.00042616	0.003382	gene-G4B84_001402	-
G4B84_003883	267.52	75.12	1.832	0.00042645	0.0033821	gene-G4B84_003883	-
G4B84_012128	66.47	1.46	5.6084	0.00042671	0.0033821	gene-G4B84_012128	-
G4B84_011578	149.97	63.4	1.2356	0.00042755	0.0033867	gene-G4B84_011578	-
G4B84_002917	19.36	2.77	2.7507	0.00042817	0.0033883	gene-G4B84_002917	-
G4B84_010371	0.9	16.18	-4.0518	0.0004283	0.0033883	gene-G4B84_010371	-
G4B84_007358	15856.2	43855.3	-1.4678	0.00042966	0.003397	gene-G4B84_007358	-
G4B84_009249	1.59	17.1	-3.3879	0.00043168	0.0034108	gene-G4B84_009249	-
G4B84_010103	40.33	5.08	2.9203	0.00043281	0.0034176	gene-G4B84_010103	-
G4B84_008381	7334.06	2314.98	1.6635	0.0004336	0.0034217	gene-G4B84_008381	-
G4B84_005313	4.52	24.19	-2.377	0.00043698	0.0034462	gene-G4B84_005313	-
G4B84_000349	727.43	351.26	1.0542	0.00043823	0.0034539	gene-G4B84_000349	-
G4B84_004737	1505.88	2801.23	-0.8956	0.00043915	0.003459	gene-G4B84_004737	-
G4B84_000666	1550.86	705.15	1.1362	0.00044017	0.0034649	gene-G4B84_000666	-
G4B84_010403	2617.15	1041.39	1.3292	0.00044372	0.0034907	gene-G4B84_010403	-
G4B84_009049	70.48	24.85	1.5372	0.00044635	0.0035091	gene-G4B84_009049	-
G4B84_004744	1591.93	679.05	1.2304	0.00044722	0.0035139	gene-G4B84_004744	-
G4B84_000545	444.25	831.86	-0.9037	0.00044974	0.0035314	gene-G4B84_000545	-
Novel.7803	91.15	38.21	1.265	0.00045036	0.0035341	-	-
G4B84_011595	0	8.71	-5.5066	0.00045614	0.003575	gene-G4B84_011595	-
G4B84_011878	0	8.63	-5.5058	0.00045594	0.003575	gene-G4B84_011878	-
G4B84_005977	8.04	44.34	-2.4858	0.00045712	0.0035805	gene-G4B84_005977	-
G4B84_009840	982.62	1949.95	-0.9878	0.00046304	0.0036246	gene-G4B84_009840	-
G4B84_001408	2358.46	8837	-1.906	0.0004657	0.0036432	gene-G4B84_001408	-
G4B84_007567	2419.68	4813.58	-0.9927	0.00046606	0.0036438	gene-G4B84_007567	-
G4B84_002748	181.41	491.69	-1.4429	0.00046801	0.0036554	gene-G4B84_002748	-
G4B84_009397	41.11	8.87	2.1997	0.00046813	0.0036554	gene-G4B84_009397	-
G4B84_004973	591.27	1169.24	-0.983	0.00047158	0.00368	gene-G4B84_004973	-
G4B84_011154	3522.76	1321.64	1.4145	0.00047596	0.003712	gene-G4B84_011154	-
G4B84_003118	197.19	728.01	-1.8851	0.00047837	0.0037285	gene-G4B84_003118	-
G4B84_012110	114.16	48.71	1.2236	0.00047975	0.0037369	gene-G4B84_012110	-
G4B84_010493	32.23	84.53	-1.3873	0.00048009	0.0037372	gene-G4B84_010493	-
G4B84_004309	0	10.13	-5.7544	0.00048619	0.0037824	gene-G4B84_004309	-
G4B84_011534	1.22	16.1	-3.6354	0.0004897	0.0038074	gene-G4B84_011534	-
G4B84_004751	113.66	243.87	-1.0993	0.00049009	0.0038081	gene-G4B84_004751	-
G4B84_001978	122.2	266.61	-1.1285	0.0004918	0.003819	gene-G4B84_001978	-
G4B84_002930	6235.32	2956.5	1.0768	0.00049223	0.00382	gene-G4B84_002930	-
G4B84_007467	16.86	59.02	-1.823	0.00049369	0.0038289	gene-G4B84_007467	-
G4B84_000763	15325	6897.27	1.1517	0.00049415	0.0038291	gene-G4B84_000763	-
G4B84_001981	111.62	241.16	-1.1068	0.00049431	0.0038291	gene-G4B84_001981	-
G4B84_004064	264.03	1123.19	-2.09	0.00049513	0.0038331	gene-G4B84_004064	-
G4B84_008227	540.49	255.88	1.0791	0.00049809	0.0038537	gene-G4B84_008227	-
G4B84_006864	549.63	254.71	1.1095	0.00050041	0.0038693	gene-G4B84_006864	-
G4B84_008853	324.94	673.74	-1.0522	0.00050105	0.0038718	gene-G4B84_008853	-
G4B84_008634	54.13	156.71	-1.5427	0.00050538	0.0038981	gene-G4B84_008634	-
G4B84_010594	201.36	389.36	-0.9522	0.00050483	0.0038981	gene-G4B84_010594	-
G4B84_010610	242.07	472.8	-0.9641	0.00050517	0.0038981	gene-G4B84_010610	-
G4B84_003975	18.51	66.36	-1.8145	0.00051334	0.0039571	gene-G4B84_003975	-
G4B84_008470	48.15	132.36	-1.4664	0.00051381	0.0039583	gene-G4B84_008470	-
G4B84_003321	822.94	1624.73	-0.9817	0.00051489	0.0039642	gene-G4B84_003321	-
G4B84_001169	119.11	39.5	1.5773	0.00051611	0.0039712	gene-G4B84_001169	-
G4B84_005058	504.99	205.56	1.2968	0.00051715	0.0039768	gene-G4B84_005058	-
G4B84_001089	114.38	263.01	-1.2065	0.00051833	0.003981	gene-G4B84_001089	-
G4B84_009903	66.35	164.2	-1.2987	0.00051831	0.003981	gene-G4B84_009903	-
G4B84_003131	4183.02	9344.17	-1.1594	0.00052312	0.0040153	gene-G4B84_003131	-
G4B84_008514	38.6	120.96	-1.6611	0.00052391	0.0040166	gene-G4B84_008514	-
G4B84_009946	148.82	309.62	-1.0516	0.00052371	0.0040166	gene-G4B84_009946	-
G4B84_007651	69.05	177.91	-1.369	0.0005251	0.0040208	gene-G4B84_007651	-
G4B84_012104	114.55	47.18	1.2786	0.00052501	0.0040208	gene-G4B84_012104	-
G4B84_007592	39739.1	14399.5	1.4645	0.00052706	0.0040334	gene-G4B84_007592	-
G4B84_001335	48350.3	24183.2	0.9995	0.00053433	0.0040865	gene-G4B84_001335	-
G4B84_008485	363.45	810.1	-1.1573	0.00053476	0.0040874	gene-G4B84_008485	-
G4B84_002058	10.94	38.87	-1.8285	0.00054316	0.004149	gene-G4B84_002058	-
G4B84_009325	134.67	52.71	1.3318	0.00054411	0.0041537	gene-G4B84_009325	-
G4B84_010756	117.98	243.46	-1.0413	0.00054443	0.0041537	gene-G4B84_010756	-
G4B84_002844	906.39	328.54	1.4662	0.00054538	0.0041584	gene-G4B84_002844	-
Novel.1560	2853.56	1520.09	0.909	0.00054764	0.0041731	-	-
G4B84_001621	226.12	698.69	-1.6324	0.00055269	0.0042091	gene-G4B84_001621	-
G4B84_004906	630.67	288.48	1.1265	0.00055508	0.0042247	gene-G4B84_004906	-
G4B84_005377	1248.6	574.78	1.1205	0.00055964	0.0042565	gene-G4B84_005377	-
G4B84_011451	69.8	20.18	1.7501	0.00055993	0.0042565	gene-G4B84_011451	-
G4B84_002463	7.24	30.5	-2.0616	0.00056315	0.0042785	gene-G4B84_002463	-
G4B84_003304	1779.75	5457.39	-1.6169	0.00056874	0.0043183	gene-G4B84_003304	-
G4B84_006800	25453.8	12231.9	1.0573	0.00057152	0.0043368	gene-G4B84_006800	-
G4B84_000242	508.39	223.61	1.1865	0.00057217	0.0043392	gene-G4B84_000242	-
G4B84_004238	2.46	25.66	-3.4206	0.00057352	0.0043466	gene-G4B84_004238	-
G4B84_008079	11	40.66	-1.8938	0.00057384	0.0043466	gene-G4B84_008079	-
G4B84_004721	6.88	32.18	-2.2223	0.00057912	0.0043839	gene-G4B84_004721	-
G4B84_011183	2184.36	847.11	1.3666	0.0005796	0.004385	gene-G4B84_011183	-
G4B84_008851	389.64	170.93	1.1954	0.00058013	0.0043864	gene-G4B84_008851	-
G4B84_005439	705.6	1366.73	-0.9531	0.00058094	0.0043873	gene-G4B84_005439	-
G4B84_007241	11.95	49.58	-2.0852	0.00058077	0.0043873	gene-G4B84_007241	-
G4B84_003673	3358.13	7605.18	-1.1795	0.0005839	0.004407	gene-G4B84_003673	-
G4B84_007524	58.9	18.02	1.6819	0.00058523	0.0044144	gene-G4B84_007524	-
G4B84_002219	7.41	40.81	-2.5051	0.0005862	0.0044191	gene-G4B84_002219	-
G4B84_006004	34.65	95.98	-1.4924	0.00058942	0.0044407	gene-G4B84_006004	-
G4B84_010391	0.96	15.34	-3.9541	0.00059032	0.0044448	gene-G4B84_010391	-
G4B84_010228	10.76	0.2	5.0003	0.00059075	0.0044454	gene-G4B84_010228	-
G4B84_002575	297.65	151.11	0.9783	0.00059201	0.0044495	gene-G4B84_002575	-
G4B84_008344	32.07	7.2	2.1839	0.00059188	0.0044495	gene-G4B84_008344	-
G4B84_009651	44.46	12.87	1.8337	0.00059308	0.004455	gene-G4B84_009651	-
G4B84_003597	354.18	174.19	1.024	0.00059479	0.0044652	gene-G4B84_003597	-
G4B84_007275	8.06	44.89	-2.4156	0.00059708	0.0044797	gene-G4B84_007275	-
G4B84_010176	13584.9	3455.31	1.975	0.00059977	0.0044972	gene-G4B84_010176	-
G4B84_010725	22.62	62.59	-1.4923	0.00060033	0.0044987	gene-G4B84_010725	-
Novel.7396	913.4	460.84	0.9889	0.00060169	0.0045063	-	-
G4B84_008450	3.97	25.38	-2.7281	0.00060348	0.004517	gene-G4B84_008450	-
G4B84_000690	12500.4	3636.54	1.7812	0.00060791	0.0045475	gene-G4B84_000690	-
G4B84_003654	253.05	510.95	-1.0103	0.00061038	0.0045632	gene-G4B84_003654	-
G4B84_004919	626.01	295.95	1.0805	0.0006133	0.0045816	gene-G4B84_004919	-
G4B84_004926	41.28	99.97	-1.2696	0.00061357	0.0045816	gene-G4B84_004926	-
G4B84_011070	1308.91	673.75	0.9594	0.00061463	0.0045869	gene-G4B84_011070	-
G4B84_000634	439.35	827.24	-0.9126	0.00061848	0.0046129	gene-G4B84_000634	-
G4B84_001308	372.78	154.32	1.2745	0.00062096	0.0046286	gene-G4B84_001308	-
G4B84_008072	263.41	585.64	-1.1521	0.0006214	0.0046292	gene-G4B84_008072	-
G4B84_004781	156.9	319.47	-1.0254	0.00062874	0.0046811	gene-G4B84_004781	-
G4B84_004778	72.07	214.24	-1.565	0.00062937	0.0046831	gene-G4B84_004778	-
G4B84_000868	484.63	219.54	1.1397	0.00063268	0.0047049	gene-G4B84_000868	-
G4B84_000456	664.56	1998.85	-1.59	0.00063595	0.0047264	gene-G4B84_000456	-
G4B84_001602	197.77	488.18	-1.3021	0.00063743	0.0047345	gene-G4B84_001602	-
G4B84_002216	58.34	178.87	-1.6312	0.00063778	0.0047345	gene-G4B84_002216	-
G4B84_000569	2727.11	1455.91	0.9053	0.00064034	0.0047507	gene-G4B84_000569	-
G4B84_004202	1149.14	564.33	1.0264	0.00064317	0.0047689	gene-G4B84_004202	-
G4B84_007322	7.54	33.23	-2.1704	0.00064395	0.0047719	gene-G4B84_007322	-
G4B84_004361	1.22	15.04	-3.5158	0.00064553	0.0047808	gene-G4B84_004361	-
G4B84_010087	37.68	10.99	1.7665	0.00064988	0.0048101	gene-G4B84_010087	-
G4B84_002747	4664.7	10183.7	-1.1264	0.00065096	0.0048127	gene-G4B84_002747	-
G4B84_004475	658.82	283.95	1.2142	0.00065136	0.0048127	gene-G4B84_004475	-
G4B84_008049	656.64	349.41	0.91	0.00065107	0.0048127	gene-G4B84_008049	-
G4B84_001971	46.84	112.06	-1.256	0.00065231	0.0048169	gene-G4B84_001971	-
Novel.6046	1070.6	2094.87	-0.9683	0.00065799	0.004856	-	-
G4B84_008025	11.49	44.14	-1.939	0.00066356	0.0048942	gene-G4B84_008025	-
G4B84_007159	32.86	5.4	2.5264	0.00066412	0.0048955	gene-G4B84_007159	-
G4B84_008239	728.87	383.42	0.9289	0.00066869	0.0049263	gene-G4B84_008239	-
G4B84_005487	87682.6	37993.2	1.2066	0.00067137	0.0049432	gene-G4B84_005487	-
G4B84_006710	158.85	348.27	-1.1322	0.00067435	0.0049622	gene-G4B84_006710	-
G4B84_000617	747.66	360.3	1.0515	0.00068132	0.0050107	gene-G4B84_000617	-
G4B84_006568	305.92	126.57	1.2801	0.00068547	0.0050382	gene-G4B84_006568	-
G4B84_002024	10.91	38.08	-1.795	0.00069112	0.005068	gene-G4B84_002024	-
G4B84_005544	136.78	312.92	-1.1865	0.00069093	0.005068	gene-G4B84_005544	-
G4B84_007843	2938.59	7897.21	-1.4262	0.0006911	0.005068	gene-G4B84_007843	-
G4B84_011055	1670.36	631.04	1.4041	0.00069112	0.005068	gene-G4B84_011055	-
G4B84_011916	18.76	1.4	3.6839	0.00069337	0.0050815	gene-G4B84_011916	-
G4B84_001058	426.26	882.06	-1.0491	0.00069378	0.0050816	gene-G4B84_001058	-
Novel.581	196.14	391.22	-0.9946	0.00069871	0.0051147	-	-
G4B84_007367	78.46	26.17	1.5886	0.0007075	0.0051742	gene-G4B84_007367	-
G4B84_011149	126.75	55.79	1.187	0.00070766	0.0051742	gene-G4B84_011149	-
G4B84_009679	42.38	11.17	1.8747	0.00070831	0.005176	gene-G4B84_009679	-
Novel.879	64.77	21.13	1.61	0.00071094	0.0051922	-	-
G4B84_009832	338.12	125.75	1.4303	0.0007131	0.0052049	gene-G4B84_009832	-
G4B84_011039	5617.72	2283.21	1.299	0.00072739	0.0053062	gene-G4B84_011039	-
G4B84_003745	1139.29	560.52	1.0233	0.0007283	0.0053098	gene-G4B84_003745	-
G4B84_005384	1.95	18.69	-3.0938	0.00073239	0.0053335	gene-G4B84_005384	-
G4B84_010748	238.06	106.36	1.1579	0.00073198	0.0053335	gene-G4B84_010748	-
G4B84_001660	429.92	917.12	-1.0944	0.00073349	0.0053354	gene-G4B84_001660	-
G4B84_005906	649.54	22.54	4.8528	0.00073334	0.0053354	gene-G4B84_005906	-
G4B84_000228	839.42	1723.62	-1.0384	0.00073569	0.0053452	gene-G4B84_000228	-
G4B84_009938	173.83	83.97	1.0512	0.00073563	0.0053452	gene-G4B84_009938	-
G4B84_006647	6.86	35.6	-2.3519	0.00073987	0.0053725	gene-G4B84_006647	-
G4B84_002184	57.31	191.8	-1.7482	0.0007413	0.0053766	gene-G4B84_002184	-
G4B84_005733	24.79	66.62	-1.4357	0.00074114	0.0053766	gene-G4B84_005733	-
G4B84_008379	1.37	16.26	-3.5615	0.0007447	0.0053982	gene-G4B84_008379	-
G4B84_008875	0.8	14.3	-4.3181	0.00075185	0.0054469	gene-G4B84_008875	-
G4B84_000354	2399.19	5557.59	-1.2122	0.00075324	0.0054538	gene-G4B84_000354	-
G4B84_008382	2467.01	1024.17	1.2686	0.00075652	0.0054745	gene-G4B84_008382	-
G4B84_000468	29.58	78.84	-1.418	0.0007631	0.0055189	gene-G4B84_000468	-
Novel.8228	41.96	12.86	1.7129	0.00076449	0.0055258	-	-
G4B84_007503	32.7	84.17	-1.3787	0.00076565	0.005531	gene-G4B84_007503	-
G4B84_006924	113.25	45.86	1.3187	0.00076807	0.0055454	gene-G4B84_006924	-
G4B84_005199	2289.48	752.02	1.6062	0.000769	0.0055489	gene-G4B84_005199	-
G4B84_010232	77.97	0.2	7.8798	0.00077064	0.0055576	gene-G4B84_010232	-
G4B84_006003	0	8.1	-5.3699	0.00078374	0.0056488	gene-G4B84_006003	-
G4B84_006346	8.87	34.58	-1.9955	0.00078444	0.0056507	gene-G4B84_006346	-
G4B84_005727	62.76	21.88	1.5436	0.00078872	0.0056782	gene-G4B84_005727	-
G4B84_004204	885.61	422.88	1.0688	0.00079248	0.0056989	gene-G4B84_004204	-
G4B84_011775	1979.84	1028.26	0.9448	0.00079249	0.0056989	gene-G4B84_011775	-
G4B84_011835	2.83	19.11	-2.7656	0.00079348	0.0057028	gene-G4B84_011835	-
G4B84_010397	552.06	144	1.9372	0.0007984	0.0057316	gene-G4B84_010397	-
Novel.1993	73.57	28.02	1.3768	0.00079797	0.0057316	-	-
Novel.529	404.35	175.97	1.2003	0.00080391	0.0057679	-	-
G4B84_001341	796.6	1474.72	-0.8893	0.00080638	0.0057824	gene-G4B84_001341	-
G4B84_003058	201.13	81.71	1.2957	0.00081162	0.0058166	gene-G4B84_003058	-
G4B84_010094	14.66	47.36	-1.6653	0.00081418	0.0058317	gene-G4B84_010094	-
G4B84_009746	972.9	2292.66	-1.2371	0.00081495	0.0058338	gene-G4B84_009746	-
G4B84_008150	281.77	597.76	-1.085	0.00081848	0.0058521	gene-G4B84_008150	-
G4B84_008332	134.42	272.95	-1.0184	0.0008182	0.0058521	gene-G4B84_008332	-
G4B84_009719	2.17	22.78	-3.5744	0.00081889	0.0058521	gene-G4B84_009719	-
G4B84_001056	83.27	191.19	-1.1944	0.00082336	0.0058807	gene-G4B84_001056	-
G4B84_012045	217.04	71.17	1.6161	0.00082481	0.0058878	gene-G4B84_012045	-
G4B84_002221	95.98	39.88	1.2607	0.00082616	0.0058941	gene-G4B84_002221	-
G4B84_007783	32.26	8.78	1.8501	0.00083494	0.00595	gene-G4B84_007783	-
G4B84_012143	175.77	79.03	1.1489	0.00083491	0.00595	gene-G4B84_012143	-
G4B84_003086	1.53	17.48	-3.4473	0.00083609	0.0059549	gene-G4B84_003086	-
G4B84_008906	29.13	7.17	1.9904	0.00083797	0.0059649	gene-G4B84_008906	-
G4B84_000085	5.83	28.92	-2.2525	0.0008399	0.0059753	gene-G4B84_000085	-
G4B84_012229	388.08	126.53	1.6122	0.00084593	0.0060148	gene-G4B84_012229	-
G4B84_011857	1822.89	4104.31	-1.1712	0.00084728	0.0060209	gene-G4B84_011857	-
G4B84_000566	647.69	289.43	1.1613	0.00085487	0.0060715	gene-G4B84_000566	-
G4B84_010468	0.26	11.06	-4.9091	0.00085761	0.0060876	gene-G4B84_010468	-
G4B84_009986	3.47	21.24	-2.6857	0.00086095	0.0061078	gene-G4B84_009986	-
G4B84_006771	154.05	69.35	1.1373	0.00086339	0.0061217	gene-G4B84_006771	-
G4B84_003287	360.1	182	0.9837	0.00086445	0.0061223	gene-G4B84_003287	-
G4B84_010080	900.41	435.7	1.051	0.00086429	0.0061223	gene-G4B84_010080	-
G4B84_001885	56.25	19.7	1.5291	0.00086623	0.0061315	gene-G4B84_001885	-
Novel.2521	503.62	197.27	1.354	0.00087176	0.0061672	-	-
G4B84_012149	1192.97	524.22	1.1854	0.00087568	0.0061915	gene-G4B84_012149	-
G4B84_007332	146.99	55.72	1.3788	0.00088379	0.0062453	gene-G4B84_007332	-
G4B84_008232	367.63	709.37	-0.9461	0.00088485	0.0062493	gene-G4B84_008232	-
G4B84_008862	209.25	419.21	-1.0043	0.00089692	0.006331	gene-G4B84_008862	-
G4B84_011141	35.26	7	2.269	0.00089788	0.0063343	gene-G4B84_011141	-
G4B84_001737	386.13	1103.69	-1.5155	0.000902	0.0063598	gene-G4B84_001737	-
Novel.6613	88.36	36.88	1.2464	0.00090771	0.0063965	-	-
G4B84_008513	64.11	135.82	-1.0831	0.00091875	0.0064707	gene-G4B84_008513	-
G4B84_004113	716.96	361.84	0.9876	0.00092631	0.0065202	gene-G4B84_004113	-
G4B84_007738	91.69	252.73	-1.4672	0.00093089	0.0065489	gene-G4B84_007738	-
G4B84_000559	968.38	535.92	0.8518	0.00094549	0.006645	gene-G4B84_000559	-
G4B84_008069	4.83	25.62	-2.485	0.00094561	0.006645	gene-G4B84_008069	-
Novel.16	28.34	144.64	-2.3736	0.00094831	0.0066603	-	-
G4B84_000697	2186.2	6136.24	-1.4893	0.00095304	0.0066865	gene-G4B84_000697	-
G4B84_006940	13.75	46.24	-1.7679	0.00095363	0.0066865	gene-G4B84_006940	-
G4B84_011659	1581.69	712.96	1.1491	0.00095348	0.0066865	gene-G4B84_011659	-
G4B84_011776	662.65	359.75	0.8815	0.00095534	0.0066948	gene-G4B84_011776	-
G4B84_000433	64.14	15.66	2.0003	0.00095693	0.0067022	gene-G4B84_000433	-
G4B84_009340	10	0.47	4.8999	0.00096336	0.0067435	gene-G4B84_009340	-
Novel.762	43.05	100.5	-1.2226	0.00097371	0.0068122	-	-
G4B84_010840	105.35	230.03	-1.1294	0.00097523	0.006819	gene-G4B84_010840	-
G4B84_004499	16.35	55.61	-1.7266	0.00097585	0.0068196	gene-G4B84_004499	-
G4B84_000348	691.53	342.19	1.0192	0.00097752	0.0068237	gene-G4B84_000348	-
G4B84_009097	237.2	91.8	1.3803	0.00097716	0.0068237	gene-G4B84_009097	-
G4B84_007345	2.8	20.07	-2.9803	0.00097849	0.0068268	gene-G4B84_007345	-
G4B84_010294	445.79	206.64	1.1135	0.00098002	0.0068336	gene-G4B84_010294	-
G4B84_005024	126.57	258.66	-1.0291	0.00098058	0.0068338	gene-G4B84_005024	-
G4B84_005129	183.52	91.13	1.013	0.00098321	0.0068483	gene-G4B84_005129	-
G4B84_004750	576.41	294.51	0.9699	0.0009839	0.0068494	gene-G4B84_004750	-
G4B84_001844	13.5	41.01	-1.5964	0.00098544	0.0068563	gene-G4B84_001844	-
Novel.1798	810.99	348.2	1.2219	0.000987	0.0068634	-	-
G4B84_011668	938.07	491.64	0.9326	0.00098963	0.0068779	gene-G4B84_011668	-
G4B84_003059	904.45	1671.11	-0.8854	0.00099457	0.0069084	gene-G4B84_003059	-
Novel.2822	2024.77	714.97	1.5021	0.00099758	0.0069255	-	-
G4B84_007095	74.09	29.21	1.3351	0.00099851	0.0069257	gene-G4B84_007095	-
G4B84_011179	58.03	15.93	1.8902	0.0009987	0.0069257	gene-G4B84_011179	-
G4B84_001937	2.53	19.29	-2.9788	0.001001	0.0069379	gene-G4B84_001937	-
G4B84_007286	160.08	68.8	1.2206	0.0010095	0.0069928	gene-G4B84_007286	-
G4B84_002932	22.46	75.78	-1.7783	0.0010107	0.0069973	gene-G4B84_002932	-
Novel.4651	184.14	405.78	-1.1426	0.0010291	0.007121	-	-
Novel.136	20.19	59.72	-1.5765	0.0010309	0.0071295	-	-
G4B84_004442	4799.01	2126.44	1.1748	0.001032	0.0071333	gene-G4B84_004442	-
G4B84_011321	52.63	17.53	1.5515	0.0010328	0.0071349	gene-G4B84_011321	-
G4B84_001905	1391.06	792.37	0.8116	0.0010371	0.0071603	gene-G4B84_001905	-
G4B84_000107	49.14	10.2	2.2652	0.0010397	0.007167	gene-G4B84_000107	-
G4B84_000817	1407.07	2939.37	-1.063	0.0010393	0.007167	gene-G4B84_000817	-
G4B84_008706	259.18	103.1	1.3239	0.0010387	0.007167	gene-G4B84_008706	-
G4B84_001516	199.51	81.2	1.2845	0.0010491	0.0072275	gene-G4B84_001516	-
G4B84_011890	40.29	115.77	-1.5151	0.0010519	0.0072391	gene-G4B84_011890	-
Novel.1641	18.59	67.79	-1.8988	0.0010517	0.0072391	-	-
G4B84_003084	0.8	12.74	-4.1602	0.0010562	0.0072646	gene-G4B84_003084	-
G4B84_008061	176.96	85.02	1.0613	0.0010573	0.0072686	gene-G4B84_008061	-
G4B84_005565	673.31	334.31	1.0115	0.0010608	0.0072881	gene-G4B84_005565	-
G4B84_005146	1411.15	2863.69	-1.0201	0.0010629	0.0072989	gene-G4B84_005146	-
G4B84_001948	66.08	24.9	1.4053	0.0010682	0.0073314	gene-G4B84_001948	-
G4B84_006702	232.07	436.05	-0.9077	0.0010691	0.0073336	gene-G4B84_006702	-
G4B84_007298	94.4	38.21	1.3093	0.0010702	0.0073369	gene-G4B84_007298	-
G4B84_009118	310.01	639.6	-1.0446	0.0010728	0.0073506	gene-G4B84_009118	-
G4B84_001923	5584.75	14485.4	-1.3751	0.0010754	0.0073646	gene-G4B84_001923	-
G4B84_008859	65.52	178.87	-1.4387	0.0010782	0.0073802	gene-G4B84_008859	-
G4B84_004115	494.63	251.61	0.977	0.0010802	0.0073898	gene-G4B84_004115	-
G4B84_004081	0	8.18	-5.3753	0.0010904	0.0074513	gene-G4B84_004081	-
G4B84_008433	138.64	325.98	-1.2397	0.0010904	0.0074513	gene-G4B84_008433	-
G4B84_000158	77.1	30.11	1.3525	0.001091	0.0074514	gene-G4B84_000158	-
G4B84_006982	480.81	906.54	-0.9152	0.0010941	0.0074684	gene-G4B84_006982	-
G4B84_011094	429.97	205.2	1.0693	0.001096	0.0074776	gene-G4B84_011094	-
Novel.6790	424.74	990.64	-1.2231	0.0010976	0.007484	-	-
G4B84_010109	129.38	26.28	2.2862	0.0010996	0.0074937	gene-G4B84_010109	-
G4B84_004557	144.94	69.48	1.0611	0.0011014	0.0075022	gene-G4B84_004557	-
G4B84_009492	87.82	195.97	-1.1501	0.0011037	0.007514	gene-G4B84_009492	-
G4B84_003267	689.87	1281.7	-0.8935	0.0011084	0.0075414	gene-G4B84_003267	-
G4B84_001598	150.34	53.97	1.4756	0.0011093	0.0075439	gene-G4B84_001598	-
G4B84_000280	122.09	238.9	-0.9643	0.0011102	0.0075457	gene-G4B84_000280	-
G4B84_008100	4670.63	2510.99	0.8954	0.0011206	0.0076127	gene-G4B84_008100	-
G4B84_001759	17.15	2.65	2.611	0.0011269	0.0076508	gene-G4B84_001759	-
G4B84_008457	57.9	138.69	-1.245	0.0011275	0.0076512	gene-G4B84_008457	-
G4B84_008359	69.97	25	1.5116	0.0011311	0.0076713	gene-G4B84_008359	-
G4B84_009906	53.48	122.92	-1.2042	0.0011343	0.0076889	gene-G4B84_009906	-
G4B84_001014	113.73	227.15	-1.0042	0.0011355	0.0076932	gene-G4B84_001014	-
G4B84_008572	142.08	310.37	-1.1287	0.0011425	0.0077359	gene-G4B84_008572	-
G4B84_008662	5.58	25.84	-2.1655	0.0011479	0.0077688	gene-G4B84_008662	-
G4B84_002532	12.72	42.81	-1.7097	0.001149	0.0077722	gene-G4B84_002532	-
G4B84_009859	1014.16	553.15	0.8749	0.0011583	0.0078307	gene-G4B84_009859	-
G4B84_000441	66.41	26.98	1.3249	0.0011669	0.0078848	gene-G4B84_000441	-
G4B84_008037	3072.25	7585.84	-1.3042	0.0011709	0.0079071	gene-G4B84_008037	-
G4B84_005331	11058.7	5350.67	1.0476	0.0011718	0.0079076	gene-G4B84_005331	-
G4B84_006097	649.71	1172.24	-0.8508	0.0011722	0.0079076	gene-G4B84_006097	-
G4B84_000412	662.79	1172.2	-0.822	0.001183	0.0079717	gene-G4B84_000412	-
G4B84_003402	1150.29	2776.35	-1.272	0.0011826	0.0079717	gene-G4B84_003402	-
G4B84_005178	16.45	1.69	3.1176	0.0011852	0.0079827	gene-G4B84_005178	-
G4B84_006876	675.27	350.08	0.9487	0.0011899	0.00801	gene-G4B84_006876	-
G4B84_012202	28.1	72.57	-1.3543	0.0011926	0.0080236	gene-G4B84_012202	-
G4B84_006752	220.96	579.77	-1.393	0.0011932	0.0080236	gene-G4B84_006752	-
G4B84_006383	371.92	201.61	0.8855	0.0011954	0.008034	gene-G4B84_006383	-
G4B84_002121	119.79	48.66	1.3	0.0011976	0.0080444	gene-G4B84_002121	-
G4B84_003222	41.63	97.62	-1.2268	0.0012055	0.0080936	gene-G4B84_003222	-
G4B84_009649	21.03	2.57	2.9825	0.0012089	0.0081119	gene-G4B84_009649	-
G4B84_006185	177.59	452.91	-1.3444	0.0012129	0.0081345	gene-G4B84_006185	-
G4B84_005368	608.65	332.54	0.8736	0.0012154	0.008144	gene-G4B84_005368	-
Novel.6788	45.25	119.46	-1.4166	0.0012156	0.008144	-	-
G4B84_004446	247.31	122.33	1.0192	0.0012164	0.0081448	gene-G4B84_004446	-
G4B84_001667	263.77	109.61	1.2721	0.0012236	0.0081891	gene-G4B84_001667	-
G4B84_008451	1.9	15.63	-2.9775	0.0012268	0.0081969	gene-G4B84_008451	-
G4B84_009741	897.45	421.38	1.0893	0.0012268	0.0081969	gene-G4B84_009741	-
G4B84_008224	6247.52	2562.91	1.2855	0.0012282	0.0082024	gene-G4B84_008224	-
Novel.5622	71.52	191.07	-1.4258	0.0012358	0.0082485	-	-
G4B84_000378	778.47	1430.55	-0.8776	0.0012488	0.0083311	gene-G4B84_000378	-
G4B84_002283	4.3	29.48	-2.6951	0.0012566	0.0083785	gene-G4B84_002283	-
G4B84_011649	192.21	376.15	-0.9702	0.0012579	0.0083828	gene-G4B84_011649	-
G4B84_010963	117.36	46.57	1.3496	0.0012616	0.0083989	gene-G4B84_010963	-
G4B84_012250	6.83	31.22	-2.1756	0.0012614	0.0083989	gene-G4B84_012250	-
G4B84_005567	12895.5	6775.96	0.9283	0.0012644	0.0084127	gene-G4B84_005567	-
G4B84_001947	108.78	47.7	1.2011	0.0012672	0.0084273	gene-G4B84_001947	-
G4B84_006746	1360.16	780.85	0.8004	0.0012689	0.0084339	gene-G4B84_006746	-
G4B84_008350	269.99	113.95	1.2413	0.00127	0.0084367	gene-G4B84_008350	-
G4B84_008026	872.83	1831.09	-1.0692	0.001272	0.0084459	gene-G4B84_008026	-
G4B84_007700	330.33	660.66	-1.0027	0.0012735	0.0084511	gene-G4B84_007700	-
G4B84_001501	115.23	49.56	1.2147	0.0012776	0.0084739	gene-G4B84_001501	-
Novel.5897	79.17	223.62	-1.5027	0.0012807	0.0084898	-	-
G4B84_008475	306.3	576.3	-0.9104	0.001282	0.008494	gene-G4B84_008475	-
G4B84_001592	38.47	116.23	-1.6122	0.0012838	0.0085015	gene-G4B84_001592	-
G4B84_003274	274.6	126.08	1.1152	0.001286	0.0085121	gene-G4B84_003274	-
G4B84_000958	500.19	1017.1	-1.0235	0.0012901	0.0085345	gene-G4B84_000958	-
G4B84_000864	1567.32	3365.35	-1.1029	0.0012933	0.0085512	gene-G4B84_000864	-
G4B84_002508	767.45	415.05	0.8873	0.0012947	0.0085514	gene-G4B84_002508	-
G4B84_006882	905.33	1794.83	-0.9874	0.0012946	0.0085514	gene-G4B84_006882	-
G4B84_011791	364.04	183.46	0.9919	0.0012957	0.0085538	gene-G4B84_011791	-
G4B84_000336	326.66	662.06	-1.0197	0.0013065	0.0086203	gene-G4B84_000336	-
G4B84_000432	469.11	1236.26	-1.3998	0.0013101	0.0086396	gene-G4B84_000432	-
G4B84_001765	4604.33	2304.48	0.9988	0.0013112	0.0086422	gene-G4B84_001765	-
G4B84_007385	7.75	39.35	-2.3502	0.0013169	0.0086758	gene-G4B84_007385	-
G4B84_011490	107.35	1167.39	-3.4395	0.0013187	0.0086826	gene-G4B84_011490	-
G4B84_009633	75.1	17.94	2.0599	0.0013231	0.0087075	gene-G4B84_009633	-
G4B84_007515	0.8	12.25	-4.1204	0.0013246	0.0087127	gene-G4B84_007515	-
G4B84_003620	1543.31	757.59	1.0271	0.0013266	0.0087178	gene-G4B84_003620	-
G4B84_006082	0	6.88	-5.1707	0.0013268	0.0087178	gene-G4B84_006082	-
G4B84_007899	997.36	485.68	1.0364	0.0013313	0.0087432	gene-G4B84_007899	-
G4B84_006741	288.83	959.01	-1.7316	0.0013321	0.0087438	gene-G4B84_006741	-
G4B84_008644	97.28	199.07	-1.0393	0.0013349	0.0087532	gene-G4B84_008644	-
G4B84_010338	19.81	78.69	-2.0115	0.0013348	0.0087532	gene-G4B84_010338	-
G4B84_003886	56.11	134.14	-1.2453	0.0013371	0.008763	gene-G4B84_003886	-
G4B84_001401	71.64	149.24	-1.0522	0.001338	0.0087646	gene-G4B84_001401	-
G4B84_001046	38.79	97.92	-1.3333	0.0013398	0.0087714	gene-G4B84_001046	-
G4B84_010652	18.57	56.79	-1.598	0.001346	0.0088077	gene-G4B84_010652	-
G4B84_007170	458.12	1114.77	-1.2839	0.0013496	0.0088222	gene-G4B84_007170	-
G4B84_009732	119.99	51.92	1.1997	0.0013492	0.0088222	gene-G4B84_009732	-
G4B84_012022	119.25	30.7	1.9358	0.0013533	0.0088415	gene-G4B84_012022	-
G4B84_006081	872.81	405.15	1.1089	0.001359	0.008874	gene-G4B84_006081	-
G4B84_001086	421.34	799.3	-0.9242	0.0013688	0.0089339	gene-G4B84_001086	-
G4B84_010500	140.37	31.13	2.145	0.0013726	0.0089535	gene-G4B84_010500	-
G4B84_010312	152.32	42.37	1.8429	0.0013758	0.0089698	gene-G4B84_010312	-
G4B84_010458	0.96	17.94	-4.1829	0.0013807	0.0089973	gene-G4B84_010458	-
Novel.8082	54.98	126.24	-1.2137	0.0013831	0.0090083	-	-
G4B84_012209	42.17	10.84	1.9756	0.0013865	0.0090234	gene-G4B84_012209	-
Novel.4536	52.09	117.63	-1.1758	0.0013868	0.0090234	-	-
G4B84_000733	77.97	181.45	-1.2083	0.0014002	0.0091038	gene-G4B84_000733	-
G4B84_004111	3642.67	1858.89	0.971	0.0014006	0.0091038	gene-G4B84_004111	-
G4B84_006027	3	27.29	-3.2639	0.0014015	0.0091046	gene-G4B84_006027	-
G4B84_006739	326.46	590.92	-0.8563	0.0014068	0.0091347	gene-G4B84_006739	-
G4B84_001313	4.37	26.16	-2.5449	0.0014117	0.0091617	gene-G4B84_001313	-
G4B84_003110	1088.29	2376.41	-1.1275	0.0014235	0.0092274	gene-G4B84_003110	-
G4B84_006312	153.63	64.44	1.2456	0.001424	0.0092274	gene-G4B84_006312	-
G4B84_009296	1392.1	2460.9	-0.8214	0.0014237	0.0092274	gene-G4B84_009296	-
G4B84_007370	78.73	169.97	-1.1009	0.0014299	0.0092609	gene-G4B84_007370	-
G4B84_006090	598.61	326.75	0.8737	0.0014309	0.0092623	gene-G4B84_006090	-
G4B84_004548	53.1	138.13	-1.3823	0.0014321	0.0092653	gene-G4B84_004548	-
G4B84_003479	72.04	203.86	-1.5105	0.0014415	0.0093215	gene-G4B84_003479	-
G4B84_003576	295.94	701.09	-1.2437	0.0014561	0.0094111	gene-G4B84_003576	-
Novel.6229	94.72	246.18	-1.3722	0.0014607	0.0094361	-	-
G4B84_011597	1.3	15.09	-3.737	0.001462	0.0094395	gene-G4B84_011597	-
G4B84_000286	496.29	916.76	-0.8845	0.0014635	0.0094441	gene-G4B84_000286	-
G4B84_010322	1680.72	3311.68	-0.9786	0.0014642	0.0094441	gene-G4B84_010322	-
G4B84_011361	290.56	606.77	-1.0588	0.0014785	0.0095315	gene-G4B84_011361	-
G4B84_005552	91.61	40.43	1.1758	0.0014796	0.0095337	gene-G4B84_005552	-
G4B84_007891	21.64	67.44	-1.6717	0.0014829	0.0095501	gene-G4B84_007891	-
G4B84_005976	0	7.05	-5.1741	0.0014889	0.0095839	gene-G4B84_005976	-
G4B84_002026	31.39	80	-1.3323	0.0014912	0.0095939	gene-G4B84_002026	-
G4B84_010056	312.77	759.69	-1.2808	0.0014942	0.0096083	gene-G4B84_010056	-
G4B84_008267	2.2	17.45	-3.0798	0.0014964	0.0096173	gene-G4B84_008267	-
G4B84_008260	979.06	2412.84	-1.3016	0.0015137	0.0097239	gene-G4B84_008260	-
G4B84_011218	34.89	10.14	1.8412	0.0015175	0.009743	gene-G4B84_011218	-
G4B84_001814	418.36	212.02	0.9825	0.0015244	0.0097823	gene-G4B84_001814	-
G4B84_003063	311.94	745.25	-1.2581	0.001529	0.009802	gene-G4B84_003063	-
G4B84_012088	404.08	889.75	-1.1407	0.0015285	0.009802	gene-G4B84_012088	-
G4B84_004715	52.54	135.36	-1.3649	0.0015387	0.009857	gene-G4B84_004715	-
G4B84_011099	392.96	190.74	1.046	0.0015396	0.009857	gene-G4B84_011099	-
G4B84_011486	31.15	83.97	-1.4309	0.0015399	0.009857	gene-G4B84_011486	-
G4B84_002773	587.88	1403.25	-1.2552	0.0015433	0.0098738	gene-G4B84_002773	-
G4B84_003603	40.67	90.58	-1.1552	0.0015507	0.0099098	gene-G4B84_003603	-
G4B84_008780	1.53	15.07	-3.1932	0.0015512	0.0099098	gene-G4B84_008780	-
G4B84_011049	23.74	60.61	-1.3562	0.0015513	0.0099098	gene-G4B84_011049	-
G4B84_001176	50.86	119.51	-1.2249	0.0015569	0.0099403	gene-G4B84_001176	-
G4B84_003698	677.8	330.41	1.034	0.0015605	0.0099584	gene-G4B84_003698	-
G4B84_011728	55.06	140.48	-1.3684	0.0015613	0.0099588	gene-G4B84_011728	-
G4B84_005011	21.05	54.69	-1.3931	0.0015637	0.0099687	gene-G4B84_005011	-
G4B84_002689	31.05	7.96	2.0032	0.0015659	0.0099731	gene-G4B84_002689	-
G4B84_009435	21.12	4.26	2.2304	0.0015659	0.0099731	gene-G4B84_009435	-
G4B84_006742	700.62	1553.01	-1.1484	0.0015679	0.0099803	gene-G4B84_006742	-
G4B84_005378	55.53	118.01	-1.0863	0.0015688	0.0099812	gene-G4B84_005378	-
G4B84_008748	86.72	180.84	-1.0525	0.0015728	0.0099968	gene-G4B84_008748	-
Novel.6875	1079.49	578.26	0.9019	0.0015724	0.0099968	-	-
G4B84_008291	1128.03	362.43	1.6367	0.0015741	0.01	gene-G4B84_008291	-
G4B84_011194	291.28	141.67	1.0445	0.0015779	0.010019	gene-G4B84_011194	-
G4B84_002209	8.85	0.32	4.7089	0.0015805	0.010026	gene-G4B84_002209	-
G4B84_008161	1418.43	809.93	0.8088	0.0015822	0.010026	gene-G4B84_008161	-
G4B84_008802	3.81	25.68	-2.6886	0.0015822	0.010026	gene-G4B84_008802	-
G4B84_011186	408.56	221.47	0.8873	0.0015808	0.010026	gene-G4B84_011186	-
[truncated: 11,162 more rows]

## Sheet: Sheet1d
Supplementary file 1d. GO enriched in the DEGs in transcriptome data
GO_ID	Term	Category	Test	Ref	TestAll	RefAll	geneID	Pvalue	FDR	richFactor
GO:0003824	catalytic activity	MF	614	2915	1021	5489	gene-G4B84_000407,gene-G4B84_009385,gene-G4B84_010091,gene-G4B84_010350,gene-G4B84_000241,gene-G4B84_002586,gene-G4B84_004446,gene-G4B84_008647,gene-G4B84_002475,gene-G4B84_010686,gene-G4B84_007689,gene-G4B84_008706,gene-G4B84_006699,gene-G4B84_004781,gene-G4B84_006251,gene-G4B84_009899,gene-G4B84_011309,gene-G4B84_000099,gene-G4B84_002700,gene-G4B84_011139,gene-G4B84_001788,gene-G4B84_002669,gen…	3.30741e-07	0.000706132	0.210635
GO:0016491	oxidoreductase activity	MF	211	869	1021	5489	gene-G4B84_000407,gene-G4B84_006251,gene-G4B84_000099,gene-G4B84_002700,gene-G4B84_011139,gene-G4B84_002972,gene-G4B84_004652,gene-G4B84_011050,gene-G4B84_004582,gene-G4B84_012279,gene-G4B84_008381,gene-G4B84_010740,gene-G4B84_011728,gene-G4B84_006760,gene-G4B84_010963,gene-G4B84_012150,gene-G4B84_002058,gene-G4B84_002774,gene-G4B84_010587,gene-G4B84_003207,gene-G4B84_002463,gene-G4B84_011428,gen…	3.0665e-06	0.00327349	0.242808
GO:0055114	oxidation-reduction process	BP	193	789	1021	5489	gene-G4B84_002058,gene-G4B84_003150,gene-G4B84_000228,gene-G4B84_012279,gene-G4B84_000067,gene-G4B84_000099,gene-G4B84_000127,gene-G4B84_000128,gene-G4B84_000347,gene-G4B84_000407,gene-G4B84_000474,gene-G4B84_000488,gene-G4B84_000602,gene-G4B84_000758,gene-G4B84_000858,gene-G4B84_001014,gene-G4B84_001313,gene-G4B84_001551,gene-G4B84_001561,gene-G4B84_001624,gene-G4B84_001734,gene-G4B84_001751,gen…	5.4518e-06	0.00387987	0.244613
GO:0048037	cofactor binding	MF	118	458	1021	5489	gene-G4B84_001014,gene-G4B84_001624,gene-G4B84_004032,gene-G4B84_004582,gene-G4B84_004652,gene-G4B84_004951,gene-G4B84_006469,gene-G4B84_006664,gene-G4B84_006752,gene-G4B84_010172,gene-G4B84_010761,gene-G4B84_011050,gene-G4B84_011944,gene-G4B84_012265,gene-G4B84_006301,gene-G4B84_000602,gene-G4B84_001890,gene-G4B84_002970,gene-G4B84_003635,gene-G4B84_003979,gene-G4B84_004042,gene-G4B84_005125,gen…	4.61542e-05	0.0246348	0.257642
GO:0001505	regulation of neurotransmitter levels	BP	6	7	1021	5489	gene-G4B84_010963,gene-G4B84_009832,gene-G4B84_010587,gene-G4B84_004842,gene-G4B84_008052,gene-G4B84_000755	0.00024102	0.0857631	0.857143
GO:0042133	neurotransmitter metabolic process	BP	6	7	1021	5489	gene-G4B84_010963,gene-G4B84_009832,gene-G4B84_010587,gene-G4B84_004842,gene-G4B84_008052,gene-G4B84_000755	0.00024102	0.0857631	0.857143
GO:0016705	oxidoreductase activity, acting on paired donors, with incorporation or reduction of molecular oxygen	MF	34	103	1021	5489	gene-G4B84_000488,gene-G4B84_003924,gene-G4B84_009719,gene-G4B84_010177,gene-G4B84_010917,gene-G4B84_000066,gene-G4B84_005125,gene-G4B84_007033,gene-G4B84_006034,gene-G4B84_001561,gene-G4B84_001734,gene-G4B84_008097,gene-G4B84_010670,gene-G4B84_010887,gene-G4B84_000602,gene-G4B84_001624,gene-G4B84_001890,gene-G4B84_002970,gene-G4B84_003012,gene-G4B84_003635,gene-G4B84_003979,gene-G4B84_004042,gen…	0.000302215	0.0921756	0.330097
GO:0016052	carbohydrate catabolic process	BP	26	73	1021	5489	gene-G4B84_002181,gene-G4B84_002842,gene-G4B84_004023,gene-G4B84_007948,gene-G4B84_010353,gene-G4B84_011915,gene-G4B84_012266,gene-G4B84_000188,gene-G4B84_001976,gene-G4B84_002054,gene-G4B84_005333,gene-G4B84_006112,gene-G4B84_002853,gene-G4B84_001573,gene-G4B84_002619,gene-G4B84_007503,gene-G4B84_008019,gene-G4B84_012262,gene-G4B84_004353,gene-G4B84_004551,gene-G4B84_009644,gene-G4B84_002656,gen…	0.000407345	0.10871	0.356164
GO:0032787	monocarboxylic acid metabolic process	BP	29	87	1021	5489	gene-G4B84_000670,gene-G4B84_001976,gene-G4B84_002054,gene-G4B84_005333,gene-G4B84_006112,gene-G4B84_002853,gene-G4B84_008470,gene-G4B84_000099,gene-G4B84_002700,gene-G4B84_005709,gene-G4B84_011139,gene-G4B84_006095,gene-G4B84_007890,gene-G4B84_008218,gene-G4B84_008247,gene-G4B84_011552,gene-G4B84_012150,gene-G4B84_012279,gene-G4B84_005125,gene-G4B84_007033,gene-G4B84_004842,gene-G4B84_008052,gen…	0.000687394	0.163065	0.333333
GO:0050662	coenzyme binding	MF	81	318	1021	5489	gene-G4B84_001014,gene-G4B84_001624,gene-G4B84_004032,gene-G4B84_004582,gene-G4B84_004652,gene-G4B84_004951,gene-G4B84_006469,gene-G4B84_006664,gene-G4B84_006752,gene-G4B84_010172,gene-G4B84_010761,gene-G4B84_011050,gene-G4B84_011944,gene-G4B84_012265,gene-G4B84_006301,gene-G4B84_000149,gene-G4B84_000671,gene-G4B84_001655,gene-G4B84_001713,gene-G4B84_003055,gene-G4B84_003372,gene-G4B84_003770,gen…	0.00109102	0.217531	0.254717
GO:0042135	neurotransmitter catabolic process	BP	5	6	1021	5489	gene-G4B84_009832,gene-G4B84_010587,gene-G4B84_004842,gene-G4B84_008052,gene-G4B84_000755	0.00112077	0.217531	0.833333
GO:0005975	carbohydrate metabolic process	BP	59	219	1021	5489	gene-G4B84_002181,gene-G4B84_002842,gene-G4B84_004023,gene-G4B84_007948,gene-G4B84_010353,gene-G4B84_011915,gene-G4B84_012266,gene-G4B84_000188,gene-G4B84_011953,gene-G4B84_005333,gene-G4B84_001976,gene-G4B84_002054,gene-G4B84_006112,gene-G4B84_002853,gene-G4B84_004098,gene-G4B84_001573,gene-G4B84_002619,gene-G4B84_007503,gene-G4B84_008019,gene-G4B84_012262,gene-G4B84_009950,gene-G4B84_004353,gen…	0.00125208	0.222766	0.269406
GO:0006476	protein deacetylation	BP	4	5	1021	5489	gene-G4B84_000345,gene-G4B84_011149,gene-G4B84_000730,gene-G4B84_001801	0.0050733	0.547157	0.8
GO:0016708	oxidoreductase activity, acting on paired donors, with incorporation or reduction of molecular oxygen, NAD(P)H as one donor, and incorporation of two atoms of oxygen into one donor	MF	4	5	1021	5489	gene-G4B84_006034,gene-G4B84_001561,gene-G4B84_001734,gene-G4B84_008097	0.0050733	0.547157	0.8
GO:0016614	oxidoreductase activity, acting on CH-OH group of donors	MF	33	115	1021	5489	gene-G4B84_006251,gene-G4B84_000099,gene-G4B84_002700,gene-G4B84_011139,gene-G4B84_002058,gene-G4B84_003207,gene-G4B84_002463,gene-G4B84_011428,gene-G4B84_005381,gene-G4B84_009899,gene-G4B84_011309,gene-G4B84_004699,gene-G4B84_011857,gene-G4B84_001961,gene-G4B84_000758,gene-G4B84_001551,gene-G4B84_001751,gene-G4B84_002688,gene-G4B84_002690,gene-G4B84_003063,gene-G4B84_004022,gene-G4B84_004481,gen…	0.00508517	0.547157	0.286957
GO:0000272	polysaccharide catabolic process	BP	18	53	1021	5489	gene-G4B84_001573,gene-G4B84_002619,gene-G4B84_007503,gene-G4B84_008019,gene-G4B84_012262,gene-G4B84_004353,gene-G4B84_004551,gene-G4B84_009644,gene-G4B84_002656,gene-G4B84_002997,gene-G4B84_007467,gene-G4B84_002181,gene-G4B84_002842,gene-G4B84_004023,gene-G4B84_007948,gene-G4B84_010353,gene-G4B84_011915,gene-G4B84_012266	0.00549093	0.547157	0.339623
GO:0020037	heme binding	MF	27	90	1021	5489	gene-G4B84_000602,gene-G4B84_001624,gene-G4B84_001890,gene-G4B84_002970,gene-G4B84_003635,gene-G4B84_003979,gene-G4B84_004042,gene-G4B84_005125,gene-G4B84_005790,gene-G4B84_006034,gene-G4B84_006218,gene-G4B84_007033,gene-G4B84_007665,gene-G4B84_007827,gene-G4B84_008411,gene-G4B84_008986,gene-G4B84_009042,gene-G4B84_009350,gene-G4B84_010740,gene-G4B84_010887,gene-G4B84_011049,gene-G4B84_011427,gen…	0.005629	0.547157	0.3
GO:0046906	tetrapyrrole binding	MF	27	90	1021	5489	gene-G4B84_000602,gene-G4B84_001624,gene-G4B84_001890,gene-G4B84_002970,gene-G4B84_003635,gene-G4B84_003979,gene-G4B84_004042,gene-G4B84_005125,gene-G4B84_005790,gene-G4B84_006034,gene-G4B84_006218,gene-G4B84_007033,gene-G4B84_007665,gene-G4B84_007827,gene-G4B84_008411,gene-G4B84_008986,gene-G4B84_009042,gene-G4B84_009350,gene-G4B84_010740,gene-G4B84_010887,gene-G4B84_011049,gene-G4B84_011427,gen…	0.005629	0.547157	0.3
GO:0009448	gamma-aminobutyric acid metabolic process	BP	3	3	1021	5489	gene-G4B84_004842,gene-G4B84_008052,gene-G4B84_000755	0.00642034	0.547157	1
GO:0009450	gamma-aminobutyric acid catabolic process	BP	3	3	1021	5489	gene-G4B84_000755,gene-G4B84_004842,gene-G4B84_008052	0.00642034	0.547157	1
GO:0016575	histone deacetylation	BP	3	3	1021	5489	gene-G4B84_000730,gene-G4B84_000345,gene-G4B84_011149	0.00642034	0.547157	1
GO:0001871	pattern binding	MF	3	3	1021	5489	gene-G4B84_001573,gene-G4B84_009744,gene-G4B84_011598	0.00642034	0.547157	1
GO:0004096	catalase activity	MF	3	3	1021	5489	gene-G4B84_008381,gene-G4B84_010740,gene-G4B84_011728	0.00642034	0.547157	1
GO:0030247	polysaccharide binding	MF	3	3	1021	5489	gene-G4B84_001573,gene-G4B84_009744,gene-G4B84_011598	0.00642034	0.547157	1
GO:0030248	cellulose binding	MF	3	3	1021	5489	gene-G4B84_001573,gene-G4B84_009744,gene-G4B84_011598	0.00642034	0.547157	1
GO:0051213	dioxygenase activity	MF	16	46	1021	5489	gene-G4B84_002972,gene-G4B84_006034,gene-G4B84_005822,gene-G4B84_009940,gene-G4B84_001561,gene-G4B84_001734,gene-G4B84_008097,gene-G4B84_000067,gene-G4B84_001313,gene-G4B84_002974,gene-G4B84_006020,gene-G4B84_006088,gene-G4B84_008382,gene-G4B84_008876,gene-G4B84_009042,gene-G4B84_009621	0.00666326	0.547157	0.347826
GO:0004553	hydrolase activity, hydrolyzing O-glycosyl compounds	MF	33	118	1021	5489	gene-G4B84_000188,gene-G4B84_004098,gene-G4B84_000074,gene-G4B84_002842,gene-G4B84_003206,gene-G4B84_004353,gene-G4B84_004551,gene-G4B84_009644,gene-G4B84_002619,gene-G4B84_007503,gene-G4B84_008019,gene-G4B84_012262,gene-G4B84_001573,gene-G4B84_010353,gene-G4B84_009744,gene-G4B84_007467,gene-G4B84_011596,gene-G4B84_002370,gene-G4B84_004023,gene-G4B84_001091,gene-G4B84_000901,gene-G4B84_002181,gen…	0.00776502	0.612207	0.279661
GO:0072329	monocarboxylic acid catabolic process	BP	6	11	1021	5489	gene-G4B84_012279,gene-G4B84_004842,gene-G4B84_008052,gene-G4B84_003679,gene-G4B84_010172,gene-G4B84_000755	0.00802895	0.612207	0.545455
GO:0016054	organic acid catabolic process	BP	12	32	1021	5489	gene-G4B84_009832,gene-G4B84_010587,gene-G4B84_008363,gene-G4B84_012279,gene-G4B84_004842,gene-G4B84_008052,gene-G4B84_007820,gene-G4B84_002774,gene-G4B84_003679,gene-G4B84_010172,gene-G4B84_003881,gene-G4B84_000755	0.00927948	0.660389	0.375
GO:0046395	carboxylic acid catabolic process	BP	12	32	1021	5489	gene-G4B84_009832,gene-G4B84_010587,gene-G4B84_008363,gene-G4B84_012279,gene-G4B84_004842,gene-G4B84_008052,gene-G4B84_007820,gene-G4B84_002774,gene-G4B84_003679,gene-G4B84_010172,gene-G4B84_003881,gene-G4B84_000755	0.00927948	0.660389	0.375
GO:0010181	FMN binding	MF	15	44	1021	5489	gene-G4B84_001014,gene-G4B84_001624,gene-G4B84_004032,gene-G4B84_004582,gene-G4B84_004652,gene-G4B84_004951,gene-G4B84_006469,gene-G4B84_006664,gene-G4B84_006752,gene-G4B84_010172,gene-G4B84_010761,gene-G4B84_011050,gene-G4B84_011944,gene-G4B84_012265,gene-G4B84_006301	0.0104084	0.716834	0.340909
GO:0050660	flavin adenine dinucleotide binding	MF	36	134	1021	5489	gene-G4B84_004683,gene-G4B84_005142,gene-G4B84_005709,gene-G4B84_006034,gene-G4B84_006130,gene-G4B84_003095,gene-G4B84_007273,gene-G4B84_007520,gene-G4B84_009331,gene-G4B84_000488,gene-G4B84_000758,gene-G4B84_001551,gene-G4B84_001751,gene-G4B84_002688,gene-G4B84_002690,gene-G4B84_003063,gene-G4B84_003924,gene-G4B84_004022,gene-G4B84_004481,gene-G4B84_005791,gene-G4B84_006272,gene-G4B84_006359,gen…	0.0109735	0.732138	0.268657
GO:0035601	protein deacylation	BP	4	6	1021	5489	gene-G4B84_001801,gene-G4B84_000345,gene-G4B84_011149,gene-G4B84_000730	0.0129783	0.765179	0.666667
GO:0016798	hydrolase activity, acting on glycosyl bonds	MF	36	136	1021	5489	gene-G4B84_000901,gene-G4B84_002181,gene-G4B84_002997,gene-G4B84_003442,gene-G4B84_003853,gene-G4B84_005552,gene-G4B84_007671,gene-G4B84_008202,gene-G4B84_008385,gene-G4B84_008868,gene-G4B84_009020,gene-G4B84_009761,gene-G4B84_011598,gene-G4B84_000188,gene-G4B84_004098,gene-G4B84_000074,gene-G4B84_002842,gene-G4B84_003206,gene-G4B84_004353,gene-G4B84_004551,gene-G4B84_009644,gene-G4B84_002619,gen…	0.0139095	0.765179	0.264706
GO:0004609	phosphatidylserine decarboxylase activity	MF	5	9	1021	5489	gene-G4B84_006005,gene-G4B84_007043,gene-G4B84_009653,gene-G4B84_011294,gene-G4B84_012178	0.0143125	0.765179	0.555556
GO:0072330	monocarboxylic acid biosynthetic process	BP	18	59	1021	5489	gene-G4B84_001976,gene-G4B84_002054,gene-G4B84_005333,gene-G4B84_006112,gene-G4B84_002853,gene-G4B84_008470,gene-G4B84_000670,gene-G4B84_006095,gene-G4B84_007890,gene-G4B84_008218,gene-G4B84_008247,gene-G4B84_011552,gene-G4B84_012150,gene-G4B84_005125,gene-G4B84_007033,gene-G4B84_001788,gene-G4B84_002669,gene-G4B84_005171	0.0181077	0.765179	0.305085
GO:0072525	pyridine-containing compound biosynthetic process	BP	10	27	1021	5489	gene-G4B84_001976,gene-G4B84_002054,gene-G4B84_005333,gene-G4B84_006112,gene-G4B84_002853,gene-G4B84_011944,gene-G4B84_003881,gene-G4B84_001354,gene-G4B84_003786,gene-G4B84_007602	0.0186781	0.765179	0.37037
GO:0030246	carbohydrate binding	MF	11	31	1021	5489	gene-G4B84_001976,gene-G4B84_002054,gene-G4B84_006112,gene-G4B84_001573,gene-G4B84_009744,gene-G4B84_011598,gene-G4B84_003853,gene-G4B84_007671,gene-G4B84_008374,gene-G4B84_010082,gene-G4B84_011353	0.0195364	0.765179	0.354839
GO:0044282	small molecule catabolic process	BP	13	39	1021	5489	gene-G4B84_009832,gene-G4B84_010587,gene-G4B84_008363,gene-G4B84_012279,gene-G4B84_004842,gene-G4B84_008052,gene-G4B84_007820,gene-G4B84_002774,gene-G4B84_003679,gene-G4B84_010172,gene-G4B84_000173,gene-G4B84_003881,gene-G4B84_000755	0.0200842	0.765179	0.333333
GO:0017144	drug metabolic process	BP	25	90	1021	5489	gene-G4B84_010458,gene-G4B84_002058,gene-G4B84_001976,gene-G4B84_002054,gene-G4B84_005333,gene-G4B84_006112,gene-G4B84_002853,gene-G4B84_003150,gene-G4B84_000228,gene-G4B84_010963,gene-G4B84_009832,gene-G4B84_010587,gene-G4B84_009231,gene-G4B84_011944,gene-G4B84_001354,gene-G4B84_004714,gene-G4B84_010044,gene-G4B84_010172,gene-G4B84_009950,gene-G4B84_010740,gene-G4B84_011728,gene-G4B84_004353,gen…	0.0205916	0.765179	0.277778
GO:0005506	iron ion binding	MF	29	108	1021	5489	gene-G4B84_008876,gene-G4B84_000602,gene-G4B84_001561,gene-G4B84_001624,gene-G4B84_001734,gene-G4B84_001890,gene-G4B84_002970,gene-G4B84_003635,gene-G4B84_003979,gene-G4B84_004042,gene-G4B84_005790,gene-G4B84_006095,gene-G4B84_006218,gene-G4B84_006752,gene-G4B84_007665,gene-G4B84_007827,gene-G4B84_007890,gene-G4B84_008097,gene-G4B84_008218,gene-G4B84_008411,gene-G4B84_008986,gene-G4B84_009350,gen…	0.0211531	0.765179	0.268519
GO:0006544	glycine metabolic process	BP	3	4	1021	5489	gene-G4B84_010963,gene-G4B84_009832,gene-G4B84_010587	0.0221072	0.765179	0.75
GO:0062013	positive regulation of small molecule metabolic process	BP	3	4	1021	5489	gene-G4B84_010044,gene-G4B84_008860,gene-G4B84_000755	0.0221072	0.765179	0.75
GO:0009063	cellular amino acid catabolic process	BP	9	24	1021	5489	gene-G4B84_009832,gene-G4B84_010587,gene-G4B84_008363,gene-G4B84_004842,gene-G4B84_008052,gene-G4B84_007820,gene-G4B84_002774,gene-G4B84_003881,gene-G4B84_000755	0.0231744	0.765179	0.375
GO:0006631	fatty acid metabolic process	BP	14	44	1021	5489	gene-G4B84_000670,gene-G4B84_006095,gene-G4B84_007890,gene-G4B84_008218,gene-G4B84_008247,gene-G4B84_011552,gene-G4B84_012150,gene-G4B84_012279,gene-G4B84_005125,gene-G4B84_007033,gene-G4B84_000099,gene-G4B84_002700,gene-G4B84_005709,gene-G4B84_011139	0.0244163	0.765179	0.318182
GO:0016746	transferase activity, transferring acyl groups	MF	28	105	1021	5489	gene-G4B84_012150,gene-G4B84_008026,gene-G4B84_011931,gene-G4B84_000109,gene-G4B84_001128,gene-G4B84_001207,gene-G4B84_003442,gene-G4B84_003591,gene-G4B84_003975,gene-G4B84_005927,gene-G4B84_006080,gene-G4B84_011290,gene-G4B84_012119,gene-G4B84_012153,gene-G4B84_012210,gene-G4B84_001538,gene-G4B84_009136,gene-G4B84_001971,gene-G4B84_002728,gene-G4B84_003081,gene-G4B84_003834,gene-G4B84_004523,gen…	0.0253678	0.765179	0.266667
GO:0098732	macromolecule deacylation	BP	4	7	1021	5489	gene-G4B84_001801,gene-G4B84_000345,gene-G4B84_011149,gene-G4B84_000730	0.025856	0.765179	0.571429
GO:0008484	sulfuric ester hydrolase activity	MF	4	7	1021	5489	gene-G4B84_003198,gene-G4B84_008673,gene-G4B84_008865,gene-G4B84_009981	0.025856	0.765179	0.571429
GO:0016747	transferase activity, transferring acyl groups other than amino-acyl groups	MF	24	88	1021	5489	gene-G4B84_012150,gene-G4B84_008026,gene-G4B84_000109,gene-G4B84_001128,gene-G4B84_001207,gene-G4B84_003442,gene-G4B84_003591,gene-G4B84_003975,gene-G4B84_005927,gene-G4B84_006080,gene-G4B84_011290,gene-G4B84_012119,gene-G4B84_012153,gene-G4B84_012210,gene-G4B84_001538,gene-G4B84_009136,gene-G4B84_001971,gene-G4B84_002728,gene-G4B84_003081,gene-G4B84_003834,gene-G4B84_004523,gene-G4B84_005024,gen…	0.0284393	0.765179	0.272727
GO:0051186	cofactor metabolic process	BP	29	111	1021	5489	gene-G4B84_001523,gene-G4B84_001976,gene-G4B84_002054,gene-G4B84_005333,gene-G4B84_006112,gene-G4B84_002853,gene-G4B84_008768,gene-G4B84_001001,gene-G4B84_010670,gene-G4B84_008060,gene-G4B84_006760,gene-G4B84_011944,gene-G4B84_000127,gene-G4B84_003881,gene-G4B84_001354,gene-G4B84_002463,gene-G4B84_011428,gene-G4B84_001788,gene-G4B84_002669,gene-G4B84_005171,gene-G4B84_000617,gene-G4B84_003786,gen…	0.0301284	0.765179	0.261261
GO:0005976	polysaccharide metabolic process	BP	19	67	1021	5489	gene-G4B84_002181,gene-G4B84_002842,gene-G4B84_004023,gene-G4B84_007948,gene-G4B84_010353,gene-G4B84_011915,gene-G4B84_012266,gene-G4B84_001573,gene-G4B84_002619,gene-G4B84_007503,gene-G4B84_008019,gene-G4B84_012262,gene-G4B84_009950,gene-G4B84_004353,gene-G4B84_004551,gene-G4B84_009644,gene-G4B84_002656,gene-G4B84_002997,gene-G4B84_007467	0.0328876	0.765179	0.283582
GO:0006629	lipid metabolic process	BP	41	168	1021	5489	gene-G4B84_000670,gene-G4B84_001176,gene-G4B84_000099,gene-G4B84_002700,gene-G4B84_005709,gene-G4B84_011139,gene-G4B84_006095,gene-G4B84_007890,gene-G4B84_008218,gene-G4B84_008247,gene-G4B84_011552,gene-G4B84_012150,gene-G4B84_012279,gene-G4B84_005125,gene-G4B84_007033,gene-G4B84_004996,gene-G4B84_006251,gene-G4B84_006699,gene-G4B84_011931,gene-G4B84_006509,gene-G4B84_012105,gene-G4B84_003688,gen…	0.0343141	0.765179	0.244048
GO:0006808	regulation of nitrogen utilization	BP	2	2	1021	5489	gene-G4B84_000755,gene-G4B84_008574	0.0345715	0.765179	1
GO:0009416	response to light stimulus	BP	2	2	1021	5489	gene-G4B84_010091,gene-G4B84_000722	0.0345715	0.765179	1
GO:0019740	nitrogen utilization	BP	2	2	1021	5489	gene-G4B84_000755,gene-G4B84_008574	0.0345715	0.765179	1
GO:0033240	positive regulation of cellular amine metabolic process	BP	2	2	1021	5489	gene-G4B84_010044,gene-G4B84_000755	0.0345715	0.765179	1
GO:0042407	cristae formation	BP	2	2	1021	5489	gene-G4B84_002602,gene-G4B84_006697	0.0345715	0.765179	1
GO:0043455	regulation of secondary metabolic process	BP	2	2	1021	5489	gene-G4B84_010044,gene-G4B84_008860	0.0345715	0.765179	1
GO:0003864	3-methyl-2-oxobutanoate hydroxymethyltransferase activity	MF	2	2	1021	5489	gene-G4B84_001788,gene-G4B84_002669	0.0345715	0.765179	1
GO:0004407	histone deacetylase activity	MF	2	2	1021	5489	gene-G4B84_000730,gene-G4B84_011149	0.0345715	0.765179	1
GO:0016634	oxidoreductase activity, acting on the CH-CH group of donors, oxygen as acceptor	MF	2	2	1021	5489	gene-G4B84_012279,gene-G4B84_006760	0.0345715	0.765179	1
GO:0033558	protein deacetylase activity	MF	2	2	1021	5489	gene-G4B84_011149,gene-G4B84_000730	0.0345715	0.765179	1
GO:1901505	carbohydrate derivative transmembrane transporter activity	MF	2	2	1021	5489	gene-G4B84_003176,gene-G4B84_000349	0.0345715	0.765179	1
GO:0034967	Set3 complex	CC	2	2	1021	5489	gene-G4B84_000345,gene-G4B84_000730	0.0345715	0.765179	1
GO:0044284	mitochondrial crista junction	CC	2	2	1021	5489	gene-G4B84_002602,gene-G4B84_006697	0.0345715	0.765179	1
GO:0005576	extracellular region	CC	18	63	1021	5489	gene-G4B84_008663,gene-G4B84_001573,gene-G4B84_002378,gene-G4B84_002619,gene-G4B84_002656,gene-G4B84_002842,gene-G4B84_004023,gene-G4B84_004353,gene-G4B84_004551,gene-G4B84_004888,gene-G4B84_007467,gene-G4B84_008019,gene-G4B84_008381,gene-G4B84_009644,gene-G4B84_009744,gene-G4B84_010458,gene-G4B84_011598,gene-G4B84_011915	0.0346778	0.765179	0.285714
GO:0006754	ATP biosynthetic process	BP	7	18	1021	5489	gene-G4B84_001976,gene-G4B84_002054,gene-G4B84_005333,gene-G4B84_006112,gene-G4B84_002853,gene-G4B84_004714,gene-G4B84_009231	0.0357771	0.765179	0.388889
GO:0009142	nucleoside triphosphate biosynthetic process	BP	7	18	1021	5489	gene-G4B84_001976,gene-G4B84_002054,gene-G4B84_005333,gene-G4B84_006112,gene-G4B84_002853,gene-G4B84_009231,gene-G4B84_004714	0.0357771	0.765179	0.388889
GO:0009145	purine nucleoside triphosphate biosynthetic process	BP	7	18	1021	5489	gene-G4B84_001976,gene-G4B84_002054,gene-G4B84_005333,gene-G4B84_006112,gene-G4B84_002853,gene-G4B84_009231,gene-G4B84_004714	0.0357771	0.765179	0.388889
GO:0009201	ribonucleoside triphosphate biosynthetic process	BP	7	18	1021	5489	gene-G4B84_001976,gene-G4B84_002054,gene-G4B84_005333,gene-G4B84_006112,gene-G4B84_002853,gene-G4B84_009231,gene-G4B84_004714	0.0357771	0.765179	0.388889
GO:0009206	purine ribonucleoside triphosphate biosynthetic process	BP	7	18	1021	5489	gene-G4B84_001976,gene-G4B84_002054,gene-G4B84_005333,gene-G4B84_006112,gene-G4B84_002853,gene-G4B84_009231,gene-G4B84_004714	0.0357771	0.765179	0.388889
GO:0019359	nicotinamide nucleotide biosynthetic process	BP	7	18	1021	5489	gene-G4B84_001976,gene-G4B84_002054,gene-G4B84_005333,gene-G4B84_006112,gene-G4B84_002853,gene-G4B84_003881,gene-G4B84_003786	0.0357771	0.765179	0.388889
GO:0019748	secondary metabolic process	BP	7	18	1021	5489	gene-G4B84_006186,gene-G4B84_010044,gene-G4B84_005794,gene-G4B84_005801,gene-G4B84_005804,gene-G4B84_010172,gene-G4B84_008860	0.0357771	0.765179	0.388889
GO:0006096	glycolytic process	BP	5	11	1021	5489	gene-G4B84_001976,gene-G4B84_002054,gene-G4B84_005333,gene-G4B84_006112,gene-G4B84_002853	0.0378594	0.765179	0.454545
GO:0006165	nucleoside diphosphate phosphorylation	BP	5	11	1021	5489	gene-G4B84_001976,gene-G4B84_002054,gene-G4B84_005333,gene-G4B84_006112,gene-G4B84_002853	0.0378594	0.765179	0.454545
GO:0006757	ATP generation from ADP	BP	5	11	1021	5489	gene-G4B84_001976,gene-G4B84_002054,gene-G4B84_005333,gene-G4B84_006112,gene-G4B84_002853	0.0378594	0.765179	0.454545
GO:0042866	pyruvate biosynthetic process	BP	5	11	1021	5489	gene-G4B84_001976,gene-G4B84_002054,gene-G4B84_005333,gene-G4B84_006112,gene-G4B84_002853	0.0378594	0.765179	0.454545
GO:0016831	carboxy-lyase activity	MF	11	34	1021	5489	gene-G4B84_006005,gene-G4B84_007043,gene-G4B84_009653,gene-G4B84_011294,gene-G4B84_012178,gene-G4B84_002403,gene-G4B84_003055,gene-G4B84_003372,gene-G4B84_007553,gene-G4B84_010172,gene-G4B84_012050	0.0387233	0.765179	0.323529
GO:0009144	purine nucleoside triphosphate metabolic process	BP	9	26	1021	5489	gene-G4B84_001976,gene-G4B84_002054,gene-G4B84_005333,gene-G4B84_006112,gene-G4B84_002853,gene-G4B84_000228,gene-G4B84_009231,gene-G4B84_004714,gene-G4B84_004088	0.039063	0.765179	0.346154
GO:0009199	ribonucleoside triphosphate metabolic process	BP	9	26	1021	5489	gene-G4B84_001976,gene-G4B84_002054,gene-G4B84_005333,gene-G4B84_006112,gene-G4B84_002853,gene-G4B84_000228,gene-G4B84_009231,gene-G4B84_004714,gene-G4B84_004088	0.039063	0.765179	0.346154
GO:0009205	purine ribonucleoside triphosphate metabolic process	BP	9	26	1021	5489	gene-G4B84_001976,gene-G4B84_002054,gene-G4B84_005333,gene-G4B84_006112,gene-G4B84_002853,gene-G4B84_000228,gene-G4B84_009231,gene-G4B84_004714,gene-G4B84_004088	0.039063	0.765179	0.346154
GO:0072524	pyridine-containing compound metabolic process	BP	10	30	1021	5489	gene-G4B84_001976,gene-G4B84_002054,gene-G4B84_005333,gene-G4B84_006112,gene-G4B84_002853,gene-G4B84_011944,gene-G4B84_003881,gene-G4B84_001354,gene-G4B84_003786,gene-G4B84_007602	0.039185	0.765179	0.333333
GO:0051537	2 iron, 2 sulfur cluster binding	MF	4	8	1021	5489	gene-G4B84_001561,gene-G4B84_001734,gene-G4B84_008097,gene-G4B84_010422	0.044211	0.765179	0.5
GO:0003674	molecular_function	MF	755	3938	1021	5489	gene-G4B84_000271,gene-G4B84_003015,gene-G4B84_006800,gene-G4B84_009950,gene-G4B84_000670,gene-G4B84_000407,gene-G4B84_006074,gene-G4B84_009385,gene-G4B84_010091,gene-G4B84_010350,gene-G4B84_000566,gene-G4B84_000923,gene-G4B84_002356,gene-G4B84_003613,gene-G4B84_005511,gene-G4B84_007007,gene-G4B84_009788,gene-G4B84_011099,gene-G4B84_007023,gene-G4B84_003176,gene-G4B84_000241,gene-G4B84_002586,gen…	0.0443993	0.765179	0.191722
GO:0016298	lipase activity	MF	6	15	1021	5489	gene-G4B84_006370,gene-G4B84_004784,gene-G4B84_004996,gene-G4B84_006187,gene-G4B84_008311,gene-G4B84_008359	0.0444788	0.765179	0.4
GO:0010565	regulation of cellular ketone metabolic process	BP	3	5	1021	5489	gene-G4B84_010044,gene-G4B84_008860,gene-G4B84_000755	0.0476581	0.765179	0.6
GO:0003857	3-hydroxyacyl-CoA dehydrogenase activity	MF	3	5	1021	5489	gene-G4B84_000099,gene-G4B84_002700,gene-G4B84_011139	0.0476581	0.765179	0.6
GO:0046556	alpha-L-arabinofuranosidase activity	MF	3	5	1021	5489	gene-G4B84_007467,gene-G4B84_011596,gene-G4B84_002370	0.0476581	0.765179	0.6
GO:0019363	pyridine nucleotide biosynthetic process	BP	7	19	1021	5489	gene-G4B84_001976,gene-G4B84_002054,gene-G4B84_005333,gene-G4B84_006112,gene-G4B84_002853,gene-G4B84_003881,gene-G4B84_003786	0.0478277	0.765179	0.368421
GO:0005509	calcium ion binding	MF	7	19	1021	5489	gene-G4B84_000188,gene-G4B84_000271,gene-G4B84_003206,gene-G4B84_004098,gene-G4B84_005081,gene-G4B84_006370,gene-G4B84_009325	0.0478277	0.765179	0.368421
GO:0046872	metal ion binding	MF	155	742	1021	5489	gene-G4B84_002403,gene-G4B84_008060,gene-G4B84_008247,gene-G4B84_008397,gene-G4B84_002853,gene-G4B84_000188,gene-G4B84_000271,gene-G4B84_003206,gene-G4B84_004098,gene-G4B84_005081,gene-G4B84_006370,gene-G4B84_009325,gene-G4B84_000602,gene-G4B84_001561,gene-G4B84_001624,gene-G4B84_001734,gene-G4B84_001890,gene-G4B84_002970,gene-G4B84_003635,gene-G4B84_003979,gene-G4B84_004042,gene-G4B84_005790,gen…	0.0485473	0.765179	0.208895
GO:0046034	ATP metabolic process	BP	8	23	1021	5489	gene-G4B84_001976,gene-G4B84_002054,gene-G4B84_005333,gene-G4B84_006112,gene-G4B84_002853,gene-G4B84_000228,gene-G4B84_009231,gene-G4B84_004714	0.0491703	0.765179	0.347826
GO:0009141	nucleoside triphosphate metabolic process	BP	9	27	1021	5489	gene-G4B84_001976,gene-G4B84_002054,gene-G4B84_005333,gene-G4B84_006112,gene-G4B84_002853,gene-G4B84_000228,gene-G4B84_009231,gene-G4B84_004714,gene-G4B84_004088	0.0492554	0.765179	0.333333
GO:0009056	catabolic process	BP	59	260	1021	5489	gene-G4B84_002181,gene-G4B84_002842,gene-G4B84_004023,gene-G4B84_007948,gene-G4B84_010353,gene-G4B84_011915,gene-G4B84_012266,gene-G4B84_000188,gene-G4B84_001976,gene-G4B84_002054,gene-G4B84_005333,gene-G4B84_006112,gene-G4B84_002853,gene-G4B84_004428,gene-G4B84_010182,gene-G4B84_004923,gene-G4B84_012104,gene-G4B84_009832,gene-G4B84_010587,gene-G4B84_008363,gene-G4B84_012279,gene-G4B84_004996,gen…	0.0513945	0.765179	0.226923
GO:0016810	hydrolase activity, acting on carbon-nitrogen (but not peptide) bonds	MF	16	57	1021	5489	gene-G4B84_003402,gene-G4B84_007820,gene-G4B84_011149,gene-G4B84_003207,gene-G4B84_004428,gene-G4B84_001801,gene-G4B84_002751,gene-G4B84_000730,gene-G4B84_003391,gene-G4B84_002252,gene-G4B84_004417,gene-G4B84_007370,gene-G4B84_007609,gene-G4B84_010086,gene-G4B84_010105,gene-G4B84_009084	0.0519757	0.765179	0.280702
GO:0006732	coenzyme metabolic process	BP	20	75	1021	5489	gene-G4B84_001523,gene-G4B84_001976,gene-G4B84_002054,gene-G4B84_005333,gene-G4B84_006112,gene-G4B84_002853,gene-G4B84_001001,gene-G4B84_010670,gene-G4B84_000127,gene-G4B84_003881,gene-G4B84_001354,gene-G4B84_002463,gene-G4B84_011428,gene-G4B84_001788,gene-G4B84_002669,gene-G4B84_005171,gene-G4B84_003786,gene-G4B84_004088,gene-G4B84_006864,gene-G4B84_011944	0.0531458	0.765179	0.266667
GO:0044255	cellular lipid metabolic process	BP	31	126	1021	5489	gene-G4B84_000670,gene-G4B84_001176,gene-G4B84_000099,gene-G4B84_002700,gene-G4B84_005709,gene-G4B84_011139,gene-G4B84_006095,gene-G4B84_007890,gene-G4B84_008218,gene-G4B84_008247,gene-G4B84_011552,gene-G4B84_012150,gene-G4B84_012279,gene-G4B84_005125,gene-G4B84_007033,gene-G4B84_004996,gene-G4B84_006699,gene-G4B84_011931,gene-G4B84_003688,gene-G4B84_006005,gene-G4B84_007043,gene-G4B84_009653,gen…	0.0544605	0.765179	0.246032
GO:0043169	cation binding	MF	155	745	1021	5489	gene-G4B84_002403,gene-G4B84_008060,gene-G4B84_008247,gene-G4B84_008397,gene-G4B84_002853,gene-G4B84_000188,gene-G4B84_000271,gene-G4B84_003206,gene-G4B84_004098,gene-G4B84_005081,gene-G4B84_006370,gene-G4B84_009325,gene-G4B84_000201,gene-G4B84_000666,gene-G4B84_000736,gene-G4B84_001129,gene-G4B84_001921,gene-G4B84_002378,gene-G4B84_002571,gene-G4B84_002603,gene-G4B84_002656,gene-G4B84_002972,gen…	0.0546684	0.765179	0.208054
GO:0009132	nucleoside diphosphate metabolic process	BP	5	12	1021	5489	gene-G4B84_001976,gene-G4B84_002054,gene-G4B84_005333,gene-G4B84_006112,gene-G4B84_002853	0.055215	0.765179	0.416667
GO:0009135	purine nucleoside diphosphate metabolic process	BP	5	12	1021	5489	gene-G4B84_001976,gene-G4B84_002054,gene-G4B84_005333,gene-G4B84_006112,gene-G4B84_002853	0.055215	0.765179	0.416667
GO:0009179	purine ribonucleoside diphosphate metabolic process	BP	5	12	1021	5489	gene-G4B84_001976,gene-G4B84_002054,gene-G4B84_005333,gene-G4B84_006112,gene-G4B84_002853	0.055215	0.765179	0.416667
GO:0009185	ribonucleoside diphosphate metabolic process	BP	5	12	1021	5489	gene-G4B84_001976,gene-G4B84_002054,gene-G4B84_005333,gene-G4B84_006112,gene-G4B84_002853	0.055215	0.765179	0.416667
GO:0046031	ADP metabolic process	BP	5	12	1021	5489	gene-G4B84_001976,gene-G4B84_002054,gene-G4B84_005333,gene-G4B84_006112,gene-G4B84_002853	0.055215	0.765179	0.416667
GO:0019239	deaminase activity	MF	5	12	1021	5489	gene-G4B84_011653,gene-G4B84_004428,gene-G4B84_003177,gene-G4B84_004093,gene-G4B84_004094	0.055215	0.765179	0.416667
GO:0004497	monooxygenase activity	MF	29	118	1021	5489	gene-G4B84_000488,gene-G4B84_003924,gene-G4B84_009719,gene-G4B84_010177,gene-G4B84_010917,gene-G4B84_000066,gene-G4B84_010670,gene-G4B84_010887,gene-G4B84_001313,gene-G4B84_001734,gene-G4B84_001890,gene-G4B84_002970,gene-G4B84_003635,gene-G4B84_003979,gene-G4B84_004683,gene-G4B84_005790,gene-G4B84_006130,gene-G4B84_006218,gene-G4B84_007665,gene-G4B84_007827,gene-G4B84_008011,gene-G4B84_008411,gen…	0.0621031	0.765179	0.245763
GO:0042737	drug catabolic process	BP	8	24	1021	5489	gene-G4B84_009832,gene-G4B84_010587,gene-G4B84_010740,gene-G4B84_011728,gene-G4B84_004353,gene-G4B84_004551,gene-G4B84_009644,gene-G4B84_000173	0.0621682	0.765179	0.333333
GO:0016709	oxidoreductase activity, acting on paired donors, with incorporation or reduction of molecular oxygen, NAD(P)H as one donor, and incorporation of one atom of oxygen	MF	7	20	1021	5489	gene-G4B84_000488,gene-G4B84_003924,gene-G4B84_009719,gene-G4B84_010177,gene-G4B84_010917,gene-G4B84_000066,gene-G4B84_010670	0.0621753	0.765179	0.35
GO:0008080	N-acetyltransferase activity	MF	14	50	1021	5489	gene-G4B84_000109,gene-G4B84_001128,gene-G4B84_001207,gene-G4B84_003442,gene-G4B84_003591,gene-G4B84_003975,gene-G4B84_005927,gene-G4B84_006080,gene-G4B84_011290,gene-G4B84_012119,gene-G4B84_012153,gene-G4B84_012210,gene-G4B84_001538,gene-G4B84_009136	0.0675878	0.765179	0.28
GO:0004659	prenyltransferase activity	MF	4	9	1021	5489	gene-G4B84_012105,gene-G4B84_003745,gene-G4B84_003158,gene-G4B84_010677	0.0681299	0.765179	0.444444
GO:0019752	carboxylic acid metabolic process	BP	55	245	1021	5489	gene-G4B84_000670,gene-G4B84_003207,gene-G4B84_001976,gene-G4B84_002054,gene-G4B84_005333,gene-G4B84_006112,gene-G4B84_002853,gene-G4B84_003150,gene-G4B84_011868,gene-G4B84_006229,gene-G4B84_008433,gene-G4B84_012050,gene-G4B84_003402,gene-G4B84_008470,gene-G4B84_008052,gene-G4B84_006752,gene-G4B84_010963,gene-G4B84_009832,gene-G4B84_010587,gene-G4B84_006864,gene-G4B84_008363,gene-G4B84_003881,gen…	0.06918	0.765179	0.22449
GO:0043167	ion binding	MF	268	1340	1021	5489	gene-G4B84_002403,gene-G4B84_008060,gene-G4B84_008247,gene-G4B84_008397,gene-G4B84_002853,gene-G4B84_000188,gene-G4B84_000271,gene-G4B84_003206,gene-G4B84_004098,gene-G4B84_005081,gene-G4B84_006370,gene-G4B84_009325,gene-G4B84_000201,gene-G4B84_000666,gene-G4B84_000736,gene-G4B84_001129,gene-G4B84_001921,gene-G4B84_002378,gene-G4B84_002571,gene-G4B84_002603,gene-G4B84_002656,gene-G4B84_002972,gen…	0.0709463	0.765179	0.2
GO:0055085	transmembrane transport	BP	85	395	1021	5489	gene-G4B84_006917,gene-G4B84_010294,gene-G4B84_007857,gene-G4B84_003015,gene-G4B84_000349,gene-G4B84_000045,gene-G4B84_009231,gene-G4B84_004714,gene-G4B84_003271,gene-G4B84_011632,gene-G4B84_004878,gene-G4B84_008497,gene-G4B84_001739,gene-G4B84_002027,gene-G4B84_003919,gene-G4B84_003478,gene-G4B84_004710,gene-G4B84_003176,gene-G4B84_011836,gene-G4B84_000051,gene-G4B84_000189,gene-G4B84_000881,gen…	0.0711848	0.765179	0.21519
GO:0016410	N-acyltransferase activity	MF	14	51	1021	5489	gene-G4B84_000109,gene-G4B84_001128,gene-G4B84_001207,gene-G4B84_003442,gene-G4B84_003591,gene-G4B84_003975,gene-G4B84_005927,gene-G4B84_006080,gene-G4B84_011290,gene-G4B84_012119,gene-G4B84_012153,gene-G4B84_012210,gene-G4B84_001538,gene-G4B84_009136	0.0779118	0.765179	0.27451
GO:0046434	organophosphate catabolic process	BP	7	21	1021	5489	gene-G4B84_001976,gene-G4B84_002054,gene-G4B84_005333,gene-G4B84_006112,gene-G4B84_002853,gene-G4B84_004996,gene-G4B84_004784	0.0788716	0.765179	0.333333
GO:1901606	alpha-amino acid catabolic process	BP	6	17	1021	5489	gene-G4B84_009832,gene-G4B84_010587,gene-G4B84_008363,gene-G4B84_007820,gene-G4B84_002774,gene-G4B84_003881	0.0790803	0.765179	0.352941
GO:0004499	N,N-dimethylaniline monooxygenase activity	MF	6	17	1021	5489	gene-G4B84_000488,gene-G4B84_003924,gene-G4B84_009719,gene-G4B84_010177,gene-G4B84_010917,gene-G4B84_000066	0.0790803	0.765179	0.352941
GO:0046914	transition metal ion binding	MF	98	463	1021	5489	gene-G4B84_000602,gene-G4B84_001561,gene-G4B84_001624,gene-G4B84_001734,gene-G4B84_001890,gene-G4B84_002970,gene-G4B84_003635,gene-G4B84_003979,gene-G4B84_004042,gene-G4B84_005790,gene-G4B84_006095,gene-G4B84_006218,gene-G4B84_006752,gene-G4B84_007665,gene-G4B84_007827,gene-G4B84_007890,gene-G4B84_008097,gene-G4B84_008218,gene-G4B84_008411,gene-G4B84_008986,gene-G4B84_009350,gene-G4B84_009651,gen…	0.079267	0.765179	0.211663
GO:0019566	arabinose metabolic process	BP	3	6	1021	5489	gene-G4B84_007467,gene-G4B84_011596,gene-G4B84_002370	0.0823378	0.765179	0.5
GO:0043385	mycotoxin metabolic process	BP	3	6	1021	5489	gene-G4B84_005794,gene-G4B84_005801,gene-G4B84_005804	0.0823378	0.765179	0.5
GO:0043386	mycotoxin biosynthetic process	BP	3	6	1021	5489	gene-G4B84_005794,gene-G4B84_005801,gene-G4B84_005804	0.0823378	0.765179	0.5
GO:0045122	aflatoxin biosynthetic process	BP	3	6	1021	5489	gene-G4B84_005794,gene-G4B84_005801,gene-G4B84_005804	0.0823378	0.765179	0.5
GO:0046222	aflatoxin metabolic process	BP	3	6	1021	5489	gene-G4B84_005794,gene-G4B84_005801,gene-G4B84_005804	0.0823378	0.765179	0.5
GO:0046373	L-arabinose metabolic process	BP	3	6	1021	5489	gene-G4B84_007467,gene-G4B84_011596,gene-G4B84_002370	0.0823378	0.765179	0.5
GO:1901376	organic heteropentacyclic compound metabolic process	BP	3	6	1021	5489	gene-G4B84_005794,gene-G4B84_005801,gene-G4B84_005804	0.0823378	0.765179	0.5
GO:1901378	organic heteropentacyclic compound biosynthetic process	BP	3	6	1021	5489	gene-G4B84_005794,gene-G4B84_005801,gene-G4B84_005804	0.0823378	0.765179	0.5
GO:0004396	hexokinase activity	MF	3	6	1021	5489	gene-G4B84_001976,gene-G4B84_002054,gene-G4B84_006112	0.0823378	0.765179	0.5
GO:0005536	glucose binding	MF	3	6	1021	5489	gene-G4B84_001976,gene-G4B84_002054,gene-G4B84_006112	0.0823378	0.765179	0.5
GO:0016407	acetyltransferase activity	MF	15	56	1021	5489	gene-G4B84_008026,gene-G4B84_000109,gene-G4B84_001128,gene-G4B84_001207,gene-G4B84_003442,gene-G4B84_003591,gene-G4B84_003975,gene-G4B84_005927,gene-G4B84_006080,gene-G4B84_011290,gene-G4B84_012119,gene-G4B84_012153,gene-G4B84_012210,gene-G4B84_001538,gene-G4B84_009136	0.0834424	0.765179	0.267857
GO:0008610	lipid biosynthetic process	BP	24	98	1021	5489	gene-G4B84_001176,gene-G4B84_000670,gene-G4B84_006095,gene-G4B84_007890,gene-G4B84_008218,gene-G4B84_008247,gene-G4B84_011552,gene-G4B84_012150,gene-G4B84_005125,gene-G4B84_007033,gene-G4B84_006251,gene-G4B84_006699,gene-G4B84_011931,gene-G4B84_003688,gene-G4B84_006005,gene-G4B84_007043,gene-G4B84_009653,gene-G4B84_011294,gene-G4B84_012178,gene-G4B84_002365,gene-G4B84_005081,gene-G4B84_001007,gen…	0.0867616	0.765179	0.244898
GO:0009127	purine nucleoside monophosphate biosynthetic process	BP	9	30	1021	5489	gene-G4B84_001976,gene-G4B84_002054,gene-G4B84_005333,gene-G4B84_006112,gene-G4B84_002853,gene-G4B84_009231,gene-G4B84_004093,gene-G4B84_004094,gene-G4B84_004714	0.0896563	0.765179	0.3
GO:0009168	purine ribonucleoside monophosphate biosynthetic process	BP	9	30	1021	5489	gene-G4B84_001976,gene-G4B84_002054,gene-G4B84_005333,gene-G4B84_006112,gene-G4B84_002853,gene-G4B84_009231,gene-G4B84_004714,gene-G4B84_004093,gene-G4B84_004094	0.0896563	0.765179	0.3
GO:0044281	small molecule metabolic process	BP	84	395	1021	5489	gene-G4B84_000670,gene-G4B84_003207,gene-G4B84_011953,gene-G4B84_002058,gene-G4B84_001523,gene-G4B84_005333,gene-G4B84_001976,gene-G4B84_002054,gene-G4B84_006112,gene-G4B84_002853,gene-G4B84_003150,gene-G4B84_000228,gene-G4B84_003391,gene-G4B84_004428,gene-G4B84_011868,gene-G4B84_006229,gene-G4B84_008433,gene-G4B84_012050,gene-G4B84_003402,gene-G4B84_008470,gene-G4B84_008052,gene-G4B84_006752,gen…	0.090615	0.765179	0.212658
GO:0006546	glycine catabolic process	BP	2	3	1021	5489	gene-G4B84_009832,gene-G4B84_010587	0.0908739	0.765179	0.666667
GO:0006620	posttranslational protein targeting to endoplasmic reticulum membrane	BP	2	3	1021	5489	gene-G4B84_003015,gene-G4B84_011632	0.0908739	0.765179	0.666667
GO:0006636	unsaturated fatty acid biosynthetic process	BP	2	3	1021	5489	gene-G4B84_005125,gene-G4B84_007033	0.0908739	0.765179	0.666667
GO:0009071	serine family amino acid catabolic process	BP	2	3	1021	5489	gene-G4B84_009832,gene-G4B84_010587	0.0908739	0.765179	0.666667
GO:0009314	response to radiation	BP	2	3	1021	5489	gene-G4B84_010091,gene-G4B84_000722	0.0908739	0.765179	0.666667
GO:0031204	posttranslational protein targeting to membrane, translocation	BP	2	3	1021	5489	gene-G4B84_003015,gene-G4B84_011632	0.0908739	0.765179	0.666667
GO:0033559	unsaturated fatty acid metabolic process	BP	2	3	1021	5489	gene-G4B84_005125,gene-G4B84_007033	0.0908739	0.765179	0.666667
GO:0034308	primary alcohol metabolic process	BP	2	3	1021	5489	gene-G4B84_002058,gene-G4B84_008860	0.0908739	0.765179	0.666667
GO:0042744	hydrogen peroxide catabolic process	BP	2	3	1021	5489	gene-G4B84_010740,gene-G4B84_011728	0.0908739	0.765179	0.666667
GO:0051261	protein depolymerization	BP	2	3	1021	5489	gene-G4B84_008315,gene-G4B84_008549	0.0908739	0.765179	0.666667
GO:0004768	stearoyl-CoA 9-desaturase activity	MF	2	3	1021	5489	gene-G4B84_005125,gene-G4B84_007033	0.0908739	0.765179	0.666667
GO:0015932	nucleobase-containing compound transmembrane transporter activity	MF	2	3	1021	5489	gene-G4B84_003176,gene-G4B84_000349	0.0908739	0.765179	0.666667
GO:0016215	acyl-CoA desaturase activity	MF	2	3	1021	5489	gene-G4B84_005125,gene-G4B84_007033	0.0908739	0.765179	0.666667
GO:0016639	oxidoreductase activity, acting on the CH-NH2 group of donors, NAD or NADP as acceptor	MF	2	3	1021	5489	gene-G4B84_002774,gene-G4B84_006752	0.0908739	0.765179	0.666667
GO:0019213	deacetylase activity	MF	2	3	1021	5489	gene-G4B84_011149,gene-G4B84_000730	0.0908739	0.765179	0.666667
GO:0000118	histone deacetylase complex	CC	2	3	1021	5489	gene-G4B84_000345,gene-G4B84_000730	0.0908739	0.765179	0.666667
GO:0061617	MICOS complex	CC	2	3	1021	5489	gene-G4B84_002602,gene-G4B84_006697	0.0908739	0.765179	0.666667
GO:0005215	transporter activity	MF	47	210	1021	5489	gene-G4B84_000670,gene-G4B84_003176,gene-G4B84_004710,gene-G4B84_006425,gene-G4B84_001169,gene-G4B84_006515,gene-G4B84_009684,gene-G4B84_009741,gene-G4B84_009858,gene-G4B84_004091,gene-G4B84_007294,gene-G4B84_008397,gene-G4B84_011836,gene-G4B84_006917,gene-G4B84_010294,gene-G4B84_007857,gene-G4B84_004423,gene-G4B84_006003,gene-G4B84_008780,gene-G4B84_010766,gene-G4B84_008820,gene-G4B84_009450,gen…	0.0913159	0.765179	0.22381
GO:0016861	intramolecular oxidoreductase activity, interconverting aldoses and ketoses	MF	4	10	1021	5489	gene-G4B84_011653,gene-G4B84_004812,gene-G4B84_005332,gene-G4B84_005333	0.0973497	0.765179	0.4
GO:0016042	lipid catabolic process	BP	7	22	1021	5489	gene-G4B84_012279,gene-G4B84_004996,gene-G4B84_004784,gene-G4B84_006187,gene-G4B84_006370,gene-G4B84_008311,gene-G4B84_008359	0.0979118	0.765179	0.318182
GO:0044275	cellular carbohydrate catabolic process	BP	7	22	1021	5489	gene-G4B84_000188,gene-G4B84_001573,gene-G4B84_002619,gene-G4B84_007503,gene-G4B84_008019,gene-G4B84_012262,gene-G4B84_003679	0.0979118	0.765179	0.318182
GO:0046496	nicotinamide nucleotide metabolic process	BP	7	22	1021	5489	gene-G4B84_001976,gene-G4B84_002054,gene-G4B84_005333,gene-G4B84_006112,gene-G4B84_002853,gene-G4B84_003881,gene-G4B84_003786	0.0979118	0.765179	0.318182
GO:0043436	oxoacid metabolic process	BP	55	251	1021	5489	gene-G4B84_000670,gene-G4B84_003207,gene-G4B84_001976,gene-G4B84_002054,gene-G4B84_005333,gene-G4B84_006112,gene-G4B84_002853,gene-G4B84_003150,gene-G4B84_011868,gene-G4B84_006229,gene-G4B84_008433,gene-G4B84_012050,gene-G4B84_003402,gene-G4B84_008470,gene-G4B84_008052,gene-G4B84_006752,gene-G4B84_010963,gene-G4B84_009832,gene-G4B84_010587,gene-G4B84_006864,gene-G4B84_008363,gene-G4B84_003881,gen…	0.0989303	0.765179	0.219124
GO:0009126	purine nucleoside monophosphate metabolic process	BP	10	35	1021	5489	gene-G4B84_001976,gene-G4B84_002054,gene-G4B84_005333,gene-G4B84_006112,gene-G4B84_002853,gene-G4B84_000228,gene-G4B84_009231,gene-G4B84_004093,gene-G4B84_004094,gene-G4B84_004714	0.100213	0.765179	0.285714
GO:0009167	purine ribonucleoside monophosphate metabolic process	BP	10	35	1021	5489	gene-G4B84_001976,gene-G4B84_002054,gene-G4B84_005333,gene-G4B84_006112,gene-G4B84_002853,gene-G4B84_000228,gene-G4B84_009231,gene-G4B84_004093,gene-G4B84_004094,gene-G4B84_004714	0.100213	0.765179	0.285714
GO:0043492	ATPase activity, coupled to movement of substances	MF	10	35	1021	5489	gene-G4B84_004710,gene-G4B84_001169,gene-G4B84_006515,gene-G4B84_009684,gene-G4B84_009741,gene-G4B84_009858,gene-G4B84_004091,gene-G4B84_007294,gene-G4B84_008397,gene-G4B84_009231	0.100213	0.765179	0.285714
GO:0016999	antibiotic metabolic process	BP	5	14	1021	5489	gene-G4B84_002058,gene-G4B84_003150,gene-G4B84_010044,gene-G4B84_010740,gene-G4B84_011728	0.101365	0.765179	0.357143
GO:0046939	nucleotide phosphorylation	BP	5	14	1021	5489	gene-G4B84_001976,gene-G4B84_002054,gene-G4B84_005333,gene-G4B84_006112,gene-G4B84_002853	0.101365	0.765179	0.357143
GO:0016645	oxidoreductase activity, acting on the CH-NH group of donors	MF	5	14	1021	5489	gene-G4B84_010963,gene-G4B84_000127,gene-G4B84_006864,gene-G4B84_008363,gene-G4B84_006034	0.101365	0.765179	0.357143
GO:0006082	organic acid metabolic process	BP	55	252	1021	5489	gene-G4B84_000670,gene-G4B84_003207,gene-G4B84_001976,gene-G4B84_002054,gene-G4B84_005333,gene-G4B84_006112,gene-G4B84_002853,gene-G4B84_003150,gene-G4B84_011868,gene-G4B84_006229,gene-G4B84_008433,gene-G4B84_012050,gene-G4B84_003402,gene-G4B84_008470,gene-G4B84_008052,gene-G4B84_006752,gene-G4B84_010963,gene-G4B84_009832,gene-G4B84_010587,gene-G4B84_006864,gene-G4B84_008363,gene-G4B84_003881,gen…	0.104625	0.765179	0.218254
GO:0051188	cofactor biosynthetic process	BP	19	77	1021	5489	gene-G4B84_001976,gene-G4B84_002054,gene-G4B84_005333,gene-G4B84_006112,gene-G4B84_002853,gene-G4B84_010670,gene-G4B84_008060,gene-G4B84_006760,gene-G4B84_011944,gene-G4B84_000127,gene-G4B84_003881,gene-G4B84_001354,gene-G4B84_001788,gene-G4B84_002669,gene-G4B84_005171,gene-G4B84_003786,gene-G4B84_004088,gene-G4B84_001961,gene-G4B84_003158	0.111242	0.765179	0.246753
GO:0016765	transferase activity, transferring alkyl or aryl (other than methyl) groups	MF	8	27	1021	5489	gene-G4B84_004781,gene-G4B84_012105,gene-G4B84_003158,gene-G4B84_010677,gene-G4B84_003745,gene-G4B84_005814,gene-G4B84_010910,gene-G4B84_008555	0.112882	0.765179	0.296296
GO:0009108	coenzyme biosynthetic process	BP	14	54	1021	5489	gene-G4B84_001976,gene-G4B84_002054,gene-G4B84_005333,gene-G4B84_006112,gene-G4B84_002853,gene-G4B84_010670,gene-G4B84_000127,gene-G4B84_003881,gene-G4B84_001354,gene-G4B84_001788,gene-G4B84_002669,gene-G4B84_005171,gene-G4B84_003786,gene-G4B84_011944	0.114708	0.765179	0.259259
GO:0019362	pyridine nucleotide metabolic process	BP	7	23	1021	5489	gene-G4B84_001976,gene-G4B84_002054,gene-G4B84_005333,gene-G4B84_006112,gene-G4B84_002853,gene-G4B84_003881,gene-G4B84_003786	0.119236	0.765179	0.304348
GO:1901575	organic substance catabolic process	BP	52	240	1021	5489	gene-G4B84_002181,gene-G4B84_002842,gene-G4B84_004023,gene-G4B84_007948,gene-G4B84_010353,gene-G4B84_011915,gene-G4B84_012266,gene-G4B84_000188,gene-G4B84_001976,gene-G4B84_002054,gene-G4B84_005333,gene-G4B84_006112,gene-G4B84_002853,gene-G4B84_004428,gene-G4B84_010182,gene-G4B84_004923,gene-G4B84_012104,gene-G4B84_009832,gene-G4B84_010587,gene-G4B84_008363,gene-G4B84_012279,gene-G4B84_004996,gen…	0.123332	0.765179	0.216667
GO:0010035	response to inorganic substance	BP	3	7	1021	5489	gene-G4B84_000137,gene-G4B84_008381,gene-G4B84_008675	0.124699	0.765179	0.428571
GO:0010393	galacturonan metabolic process	BP	3	7	1021	5489	gene-G4B84_004353,gene-G4B84_004551,gene-G4B84_009644	0.124699	0.765179	0.428571
GO:0045488	pectin metabolic process	BP	3	7	1021	5489	gene-G4B84_004353,gene-G4B84_004551,gene-G4B84_009644	0.124699	0.765179	0.428571
GO:0045490	pectin catabolic process	BP	3	7	1021	5489	gene-G4B84_004353,gene-G4B84_004551,gene-G4B84_009644	0.124699	0.765179	0.428571
GO:0045835	negative regulation of meiotic nuclear division	BP	3	7	1021	5489	gene-G4B84_008596,gene-G4B84_000345,gene-G4B84_000730	0.124699	0.765179	0.428571
GO:0051447	negative regulation of meiotic cell cycle	BP	3	7	1021	5489	gene-G4B84_000345,gene-G4B84_000730,gene-G4B84_008596	0.124699	0.765179	0.428571
GO:0062012	regulation of small molecule metabolic process	BP	3	7	1021	5489	gene-G4B84_010044,gene-G4B84_008860,gene-G4B84_000755	0.124699	0.765179	0.428571
GO:0072593	reactive oxygen species metabolic process	BP	3	7	1021	5489	gene-G4B84_003204,gene-G4B84_010740,gene-G4B84_011728	0.124699	0.765179	0.428571
GO:2000242	negative regulation of reproductive process	BP	3	7	1021	5489	gene-G4B84_000345,gene-G4B84_000730,gene-G4B84_008596	0.124699	0.765179	0.428571
GO:0004601	peroxidase activity	MF	3	7	1021	5489	gene-G4B84_008381,gene-G4B84_010740,gene-G4B84_011728	0.124699	0.765179	0.428571
GO:0004806	triglyceride lipase activity	MF	3	7	1021	5489	gene-G4B84_006187,gene-G4B84_008311,gene-G4B84_008359	0.124699	0.765179	0.428571
GO:0016742	hydroxymethyl-, formyl- and related transferase activity	MF	3	7	1021	5489	gene-G4B84_001788,gene-G4B84_002669,gene-G4B84_000128	0.124699	0.765179	0.428571
GO:0006633	fatty acid biosynthetic process	BP	9	32	1021	5489	gene-G4B84_005125,gene-G4B84_007033,gene-G4B84_000670,gene-G4B84_006095,gene-G4B84_007890,gene-G4B84_008218,gene-G4B84_008247,gene-G4B84_011552,gene-G4B84_012150	0.124943	0.765179	0.28125
GO:0009156	ribonucleoside monophosphate biosynthetic process	BP	9	32	1021	5489	gene-G4B84_001976,gene-G4B84_002054,gene-G4B84_005333,gene-G4B84_006112,gene-G4B84_002853,gene-G4B84_009231,gene-G4B84_004093,gene-G4B84_004094,gene-G4B84_004714	0.124943	0.765179	0.28125
GO:0042626	ATPase activity, coupled to transmembrane movement of substances	MF	9	32	1021	5489	gene-G4B84_004710,gene-G4B84_009231,gene-G4B84_001169,gene-G4B84_006515,gene-G4B84_009684,gene-G4B84_009741,gene-G4B84_009858,gene-G4B84_004091,gene-G4B84_007294	0.124943	0.765179	0.28125
GO:0022857	transmembrane transporter activity	MF	35	156	1021	5489	gene-G4B84_003176,gene-G4B84_004710,gene-G4B84_006425,gene-G4B84_001169,gene-G4B84_006515,gene-G4B84_009684,gene-G4B84_009741,gene-G4B84_009858,gene-G4B84_004091,gene-G4B84_007294,gene-G4B84_011836,gene-G4B84_006917,gene-G4B84_010294,gene-G4B84_007857,gene-G4B84_001850,gene-G4B84_000411,gene-G4B84_008497,gene-G4B84_002027,gene-G4B84_003919,gene-G4B84_000349,gene-G4B84_000189,gene-G4B84_003478,gen…	0.12728	0.765179	0.224359
GO:0006090	pyruvate metabolic process	BP	5	15	1021	5489	gene-G4B84_001976,gene-G4B84_002054,gene-G4B84_005333,gene-G4B84_006112,gene-G4B84_002853	0.129808	0.765179	0.333333
GO:0009166	nucleotide catabolic process	BP	5	15	1021	5489	gene-G4B84_001976,gene-G4B84_002054,gene-G4B84_005333,gene-G4B84_006112,gene-G4B84_002853	0.129808	0.765179	0.333333
GO:1901292	nucleoside phosphate catabolic process	BP	5	15	1021	5489	gene-G4B84_001976,gene-G4B84_002054,gene-G4B84_005333,gene-G4B84_006112,gene-G4B84_002853	0.129808	0.765179	0.333333
GO:0102483	scopolin beta-glucosidase activity	MF	4	11	1021	5489	gene-G4B84_002619,gene-G4B84_007503,gene-G4B84_008019,gene-G4B84_012262	0.131344	0.765179	0.363636
GO:0006733	oxidoreduction coenzyme metabolic process	BP	8	28	1021	5489	gene-G4B84_001976,gene-G4B84_002054,gene-G4B84_005333,gene-G4B84_006112,gene-G4B84_002853,gene-G4B84_010670,gene-G4B84_003881,gene-G4B84_003786	0.133613	0.765179	0.285714
GO:0009161	ribonucleoside monophosphate metabolic process	BP	10	37	1021	5489	gene-G4B84_001976,gene-G4B84_002054,gene-G4B84_005333,gene-G4B84_006112,gene-G4B84_002853,gene-G4B84_000228,gene-G4B84_009231,gene-G4B84_004093,gene-G4B84_004094,gene-G4B84_004714	0.134786	0.765179	0.27027
GO:0016787	hydrolase activity	MF	177	886	1021	5489	gene-G4B84_000241,gene-G4B84_002586,gene-G4B84_004446,gene-G4B84_008647,gene-G4B84_007689,gene-G4B84_008706,gene-G4B84_010418,gene-G4B84_008458,gene-G4B84_000722,gene-G4B84_007635,gene-G4B84_004710,gene-G4B84_001169,gene-G4B84_006515,gene-G4B84_009684,gene-G4B84_009741,gene-G4B84_009858,gene-G4B84_004091,gene-G4B84_007294,gene-G4B84_008397,gene-G4B84_003402,gene-G4B84_007820,gene-G4B84_002196,gen…	0.135346	0.765179	0.199774
GO:0006575	cellular modified amino acid metabolic process	BP	7	24	1021	5489	gene-G4B84_008768,gene-G4B84_008060,gene-G4B84_000127,gene-G4B84_001788,gene-G4B84_002669,gene-G4B84_005171,gene-G4B84_006864	0.142735	0.765179	0.291667
GO:0019637	organophosphate metabolic process	BP	35	158	1021	5489	gene-G4B84_002588,gene-G4B84_001523,gene-G4B84_001976,gene-G4B84_002054,gene-G4B84_005333,gene-G4B84_006112,gene-G4B84_002853,gene-G4B84_000228,gene-G4B84_001176,gene-G4B84_001001,gene-G4B84_004996,gene-G4B84_009231,gene-G4B84_003688,gene-G4B84_006005,gene-G4B84_007043,gene-G4B84_009653,gene-G4B84_011294,gene-G4B84_012178,gene-G4B84_010963,gene-G4B84_004093,gene-G4B84_004094,gene-G4B84_004784,gen…	0.144895	0.765179	0.221519
GO:0009124	nucleoside monophosphate biosynthetic process	BP	9	33	1021	5489	gene-G4B84_001976,gene-G4B84_002054,gene-G4B84_005333,gene-G4B84_006112,gene-G4B84_002853,gene-G4B84_009231,gene-G4B84_004093,gene-G4B84_004094,gene-G4B84_004714	0.144999	0.765179	0.272727
GO:0006486	protein glycosylation	BP	6	20	1021	5489	gene-G4B84_001968,gene-G4B84_001858,gene-G4B84_003206,gene-G4B84_003409,gene-G4B84_003745,gene-G4B84_008150	0.152138	0.765179	0.3
GO:0009100	glycoprotein metabolic process	BP	6	20	1021	5489	gene-G4B84_001858,gene-G4B84_003206,gene-G4B84_003409,gene-G4B84_003745,gene-G4B84_008150,gene-G4B84_001968	0.152138	0.765179	0.3
GO:0009101	glycoprotein biosynthetic process	BP	6	20	1021	5489	gene-G4B84_001858,gene-G4B84_003206,gene-G4B84_003409,gene-G4B84_003745,gene-G4B84_008150,gene-G4B84_001968	0.152138	0.765179	0.3
GO:0043413	macromolecule glycosylation	BP	6	20	1021	5489	gene-G4B84_001858,gene-G4B84_003206,gene-G4B84_003409,gene-G4B84_003745,gene-G4B84_008150,gene-G4B84_001968	0.152138	0.765179	0.3
GO:0009123	nucleoside monophosphate metabolic process	BP	10	38	1021	5489	gene-G4B84_001976,gene-G4B84_002054,gene-G4B84_005333,gene-G4B84_006112,gene-G4B84_002853,gene-G4B84_000228,gene-G4B84_009231,gene-G4B84_004093,gene-G4B84_004094,gene-G4B84_004714	0.154161	0.765179	0.263158
GO:0022804	active transmembrane transporter activity	MF	13	52	1021	5489	gene-G4B84_004710,gene-G4B84_001169,gene-G4B84_006515,gene-G4B84_009684,gene-G4B84_009741,gene-G4B84_009858,gene-G4B84_004091,gene-G4B84_007294,gene-G4B84_001850,gene-G4B84_000411,gene-G4B84_009231,gene-G4B84_000045,gene-G4B84_004878	0.155359	0.765179	0.25
GO:0006821	chloride transport	BP	2	4	1021	5489	gene-G4B84_004878,gene-G4B84_011836	0.159641	0.765179	0.5
GO:0006829	zinc ion transport	BP	2	4	1021	5489	gene-G4B84_002027,gene-G4B84_003919	0.159641	0.765179	0.5
GO:0006986	response to unfolded protein	BP	2	4	1021	5489	gene-G4B84_008257,gene-G4B84_003015	0.159641	0.765179	0.5
GO:0009065	glutamine family amino acid catabolic process	BP	2	4	1021	5489	gene-G4B84_008363,gene-G4B84_002774	0.159641	0.765179	0.5
GO:0017001	antibiotic catabolic process	BP	2	4	1021	5489	gene-G4B84_010740,gene-G4B84_011728	0.159641	0.765179	0.5
GO:0018209	peptidyl-serine modification	BP	2	4	1021	5489	gene-G4B84_005298,gene-G4B84_003698	0.159641	0.765179	0.5
GO:0033238	regulation of cellular amine metabolic process	BP	2	4	1021	5489	gene-G4B84_010044,gene-G4B84_000755	0.159641	0.765179	0.5
GO:0042542	response to hydrogen peroxide	BP	2	4	1021	5489	gene-G4B84_008381,gene-G4B84_008675	0.159641	0.765179	0.5
GO:0042743	hydrogen peroxide metabolic process	BP	2	4	1021	5489	gene-G4B84_010740,gene-G4B84_011728	0.159641	0.765179	0.5
GO:0070301	cellular response to hydrogen peroxide	BP	2	4	1021	5489	gene-G4B84_008381,gene-G4B84_008675	0.159641	0.765179	0.5
GO:0071236	cellular response to antibiotic	BP	2	4	1021	5489	gene-G4B84_008381,gene-G4B84_008675	0.159641	0.765179	0.5
GO:0071577	zinc ion transmembrane transport	BP	2	4	1021	5489	gene-G4B84_002027,gene-G4B84_003919	0.159641	0.765179	0.5
GO:1901264	carbohydrate derivative transport	BP	2	4	1021	5489	gene-G4B84_000349,gene-G4B84_003176	0.159641	0.765179	0.5
GO:0003958	NADPH-hemoprotein reductase activity	MF	2	4	1021	5489	gene-G4B84_004652,gene-G4B84_011050	0.159641	0.765179	0.5
GO:0005092	GDP-dissociation inhibitor activity	MF	2	4	1021	5489	gene-G4B84_005337,gene-G4B84_010956	0.159641	0.765179	0.5
GO:0008810	cellulase activity	MF	2	4	1021	5489	gene-G4B84_001573,gene-G4B84_010353	0.159641	0.765179	0.5
GO:0015108	chloride transmembrane transporter activity	MF	2	4	1021	5489	gene-G4B84_011836,gene-G4B84_004878	0.159641	0.765179	0.5
GO:0015293	symporter activity	MF	2	4	1021	5489	gene-G4B84_000411,gene-G4B84_004878	0.159641	0.765179	0.5
GO:0015294	solute:cation symporter activity	MF	2	4	1021	5489	gene-G4B84_000411,gene-G4B84_004878	0.159641	0.765179	0.5
GO:0016717	oxidoreductase activity, acting on paired donors, with oxidation of a pair of donors resulting in the reduction of molecular oxygen to two molecules of water	MF	2	4	1021	5489	gene-G4B84_005125,gene-G4B84_007033	0.159641	0.765179	0.5
GO:0018024	histone-lysine N-methyltransferase activity	MF	2	4	1021	5489	gene-G4B84_008596,gene-G4B84_009862	0.159641	0.765179	0.5
GO:0016616	oxidoreductase activity, acting on the CH-OH group of donors, NAD or NADP as acceptor	MF	14	57	1021	5489	gene-G4B84_006251,gene-G4B84_000099,gene-G4B84_002700,gene-G4B84_011139,gene-G4B84_002058,gene-G4B84_003207,gene-G4B84_002463,gene-G4B84_011428,gene-G4B84_005381,gene-G4B84_009899,gene-G4B84_011309,gene-G4B84_001961,gene-G4B84_004699,gene-G4B84_011857	0.160156	0.765179	0.245614
GO:0009636	response to toxic substance	BP	5	16	1021	5489	gene-G4B84_008381,gene-G4B84_008675,gene-G4B84_003656,gene-G4B84_010740,gene-G4B84_011728	0.161395	0.765179	0.3125
GO:0030243	cellulose metabolic process	BP	5	16	1021	5489	gene-G4B84_001573,gene-G4B84_002619,gene-G4B84_007503,gene-G4B84_008019,gene-G4B84_012262	0.161395	0.765179	0.3125
GO:0030245	cellulose catabolic process	BP	5	16	1021	5489	gene-G4B84_001573,gene-G4B84_002619,gene-G4B84_007503,gene-G4B84_008019,gene-G4B84_012262	0.161395	0.765179	0.3125
GO:0042398	cellular modified amino acid biosynthetic process	BP	5	16	1021	5489	gene-G4B84_008060,gene-G4B84_000127,gene-G4B84_001788,gene-G4B84_002669,gene-G4B84_005171	0.161395	0.765179	0.3125
GO:0051275	beta-glucan catabolic process	BP	5	16	1021	5489	gene-G4B84_001573,gene-G4B84_002619,gene-G4B84_007503,gene-G4B84_008019,gene-G4B84_012262	0.161395	0.765179	0.3125
GO:0097237	cellular response to toxic substance	BP	5	16	1021	5489	gene-G4B84_008381,gene-G4B84_008675,gene-G4B84_003656,gene-G4B84_010740,gene-G4B84_011728	0.161395	0.765179	0.3125
GO:0016638	oxidoreductase activity, acting on the CH-NH2 group of donors	MF	5	16	1021	5489	gene-G4B84_002774,gene-G4B84_010587,gene-G4B84_011944,gene-G4B84_002199,gene-G4B84_006752	0.161395	0.765179	0.3125
GO:0044248	cellular catabolic process	BP	45	210	1021	5489	gene-G4B84_000188,gene-G4B84_001976,gene-G4B84_002054,gene-G4B84_005333,gene-G4B84_006112,gene-G4B84_002853,gene-G4B84_004428,gene-G4B84_010182,gene-G4B84_004923,gene-G4B84_012104,gene-G4B84_009832,gene-G4B84_010587,gene-G4B84_008363,gene-G4B84_012279,gene-G4B84_004996,gene-G4B84_003178,gene-G4B84_006711,gene-G4B84_004784,gene-G4B84_004842,gene-G4B84_008052,gene-G4B84_002656,gene-G4B84_001561,gen…	0.162453	0.765179	0.214286
GO:0006091	generation of precursor metabolites and energy	BP	9	34	1021	5489	gene-G4B84_002058,gene-G4B84_001976,gene-G4B84_002054,gene-G4B84_005333,gene-G4B84_006112,gene-G4B84_002853,gene-G4B84_003150,gene-G4B84_000228,gene-G4B84_000173	0.166562	0.765179	0.264706
GO:0015399	primary active transmembrane transporter activity	MF	9	34	1021	5489	gene-G4B84_004710,gene-G4B84_001169,gene-G4B84_006515,gene-G4B84_009684,gene-G4B84_009741,gene-G4B84_009858,gene-G4B84_004091,gene-G4B84_007294,gene-G4B84_009231	0.166562	0.765179	0.264706
GO:0015405	P-P-bond-hydrolysis-driven transmembrane transporter activity	MF	9	34	1021	5489	gene-G4B84_004710,gene-G4B84_001169,gene-G4B84_006515,gene-G4B84_009684,gene-G4B84_009741,gene-G4B84_009858,gene-G4B84_004091,gene-G4B84_007294,gene-G4B84_009231	0.166562	0.765179	0.264706
GO:0051287	NAD binding	MF	7	25	1021	5489	gene-G4B84_001801,gene-G4B84_011139,gene-G4B84_003207,gene-G4B84_004699,gene-G4B84_005381,gene-G4B84_011857,gene-G4B84_005178	0.168253	0.765179	0.28
GO:0015698	inorganic anion transport	BP	4	12	1021	5489	gene-G4B84_001850,gene-G4B84_011836,gene-G4B84_010644,gene-G4B84_004878	0.169409	0.765179	0.333333
GO:0051784	negative regulation of nuclear division	BP	4	12	1021	5489	gene-G4B84_000625,gene-G4B84_000345,gene-G4B84_000730,gene-G4B84_008596	0.169409	0.765179	0.333333
GO:0016646	oxidoreductase activity, acting on the CH-NH group of donors, NAD or NADP as acceptor	MF	4	12	1021	5489	gene-G4B84_010963,gene-G4B84_000127,gene-G4B84_006864,gene-G4B84_006034	0.169409	0.765179	0.333333
GO:0000041	transition metal ion transport	BP	3	8	1021	5489	gene-G4B84_008497,gene-G4B84_002027,gene-G4B84_003919	0.172992	0.765179	0.375
GO:0001678	cellular glucose homeostasis	BP	3	8	1021	5489	gene-G4B84_001976,gene-G4B84_002054,gene-G4B84_006112	0.172992	0.765179	0.375
GO:0006536	glutamate metabolic process	BP	3	8	1021	5489	gene-G4B84_006752,gene-G4B84_002774,gene-G4B84_008052	0.172992	0.765179	0.375
GO:0015939	pantothenate metabolic process	BP	3	8	1021	5489	gene-G4B84_001788,gene-G4B84_002669,gene-G4B84_005171	0.172992	0.765179	0.375
GO:0015940	pantothenate biosynthetic process	BP	3	8	1021	5489	gene-G4B84_001788,gene-G4B84_002669,gene-G4B84_005171	0.172992	0.765179	0.375
GO:0033500	carbohydrate homeostasis	BP	3	8	1021	5489	gene-G4B84_001976,gene-G4B84_002054,gene-G4B84_006112	0.172992	0.765179	0.375
GO:0035966	response to topologically incorrect protein	BP	3	8	1021	5489	gene-G4B84_003015,gene-G4B84_008257,gene-G4B84_008178	0.172992	0.765179	0.375
GO:0040020	regulation of meiotic nuclear division	BP	3	8	1021	5489	gene-G4B84_000345,gene-G4B84_000730,gene-G4B84_008596	0.172992	0.765179	0.375
GO:0042593	glucose homeostasis	BP	3	8	1021	5489	gene-G4B84_001976,gene-G4B84_002054,gene-G4B84_006112	0.172992	0.765179	0.375
GO:0080134	regulation of response to stress	BP	3	8	1021	5489	gene-G4B84_005298,gene-G4B84_000730,gene-G4B84_000625	0.172992	0.765179	0.375
GO:0080135	regulation of cellular response to stress	BP	3	8	1021	5489	gene-G4B84_005298,gene-G4B84_000730,gene-G4B84_000625	0.172992	0.765179	0.375
GO:0000155	phosphorelay sensor kinase activity	MF	3	8	1021	5489	gene-G4B84_009385,gene-G4B84_010091,gene-G4B84_010350	0.172992	0.765179	0.375
GO:0003777	microtubule motor activity	MF	3	8	1021	5489	gene-G4B84_008549,gene-G4B84_007689,gene-G4B84_008706	0.172992	0.765179	0.375
GO:0004620	phospholipase activity	MF	3	8	1021	5489	gene-G4B84_006370,gene-G4B84_004784,gene-G4B84_004996	0.172992	0.765179	0.375
GO:0004673	protein histidine kinase activity	MF	3	8	1021	5489	gene-G4B84_009385,gene-G4B84_010091,gene-G4B84_010350	0.172992	0.765179	0.375
GO:0016775	phosphotransferase activity, nitrogenous group as acceptor	MF	3	8	1021	5489	gene-G4B84_009385,gene-G4B84_010091,gene-G4B84_010350	0.172992	0.765179	0.375
GO:0046915	transition metal ion transmembrane transporter activity	MF	3	8	1021	5489	gene-G4B84_008497,gene-G4B84_002027,gene-G4B84_003919	0.172992	0.765179	0.375
GO:0006644	phospholipid metabolic process	BP	14	58	1021	5489	gene-G4B84_001176,gene-G4B84_004996,gene-G4B84_003688,gene-G4B84_006005,gene-G4B84_007043,gene-G4B84_009653,gene-G4B84_011294,gene-G4B84_012178,gene-G4B84_004784,gene-G4B84_005081,gene-G4B84_011046,gene-G4B84_011159,gene-G4B84_007087,gene-G4B84_001007	0.177127	0.765179	0.241379
GO:0030170	pyridoxal phosphate binding	MF	14	58	1021	5489	gene-G4B84_000149,gene-G4B84_000671,gene-G4B84_001655,gene-G4B84_001713,gene-G4B84_003055,gene-G4B84_003372,gene-G4B84_003770,gene-G4B84_006407,gene-G4B84_006914,gene-G4B84_007641,gene-G4B84_008052,gene-G4B84_008433,gene-G4B84_011585,gene-G4B84_012050	0.177127	0.765179	0.241379
GO:0070279	vitamin B6 binding	MF	14	58	1021	5489	gene-G4B84_000149,gene-G4B84_000671,gene-G4B84_001655,gene-G4B84_001713,gene-G4B84_003055,gene-G4B84_003372,gene-G4B84_003770,gene-G4B84_006407,gene-G4B84_006914,gene-G4B84_007641,gene-G4B84_008052,gene-G4B84_008433,gene-G4B84_011585,gene-G4B84_012050	0.177127	0.765179	0.241379
GO:0009072	aromatic amino acid family metabolic process	BP	8	30	1021	5489	gene-G4B84_003207,gene-G4B84_003881,gene-G4B84_004781,gene-G4B84_007820,gene-G4B84_002972,gene-G4B84_002974,gene-G4B84_002976,gene-G4B84_006020	0.180297	0.765179	0.266667
GO:0008483	transaminase activity	MF	8	30	1021	5489	gene-G4B84_008052,gene-G4B84_008433,gene-G4B84_000149,gene-G4B84_000671,gene-G4B84_001713,gene-G4B84_006914,gene-G4B84_007641,gene-G4B84_009832	0.180297	0.765179	0.266667
GO:0016769	transferase activity, transferring nitrogenous groups	MF	8	30	1021	5489	gene-G4B84_008052,gene-G4B84_008433,gene-G4B84_000149,gene-G4B84_000671,gene-G4B84_001713,gene-G4B84_006914,gene-G4B84_007641,gene-G4B84_009832	0.180297	0.765179	0.266667
GO:0016830	carbon-carbon lyase activity	MF	11	44	1021	5489	gene-G4B84_006005,gene-G4B84_007043,gene-G4B84_009653,gene-G4B84_011294,gene-G4B84_012178,gene-G4B84_002403,gene-G4B84_003055,gene-G4B84_003372,gene-G4B84_007553,gene-G4B84_010172,gene-G4B84_012050	0.181496	0.765179	0.25
GO:0001079	nitrogen catabolite regulation of transcription from RNA polymerase II promoter	BP	1	1	1021	5489	gene-G4B84_000755	0.186008	0.765179	1
GO:0001080	nitrogen catabolite activation of transcription from RNA polymerase II promoter	BP	1	1	1021	5489	gene-G4B84_000755	0.186008	0.765179	1
GO:0005993	trehalose catabolic process	BP	1	1	1021	5489	gene-G4B84_000188	0.186008	0.765179	1
GO:0006106	fumarate metabolic process	BP	1	1	1021	5489	gene-G4B84_002774	0.186008	0.765179	1
GO:0006121	mitochondrial electron transport, succinate to ubiquinone	BP	1	1	1021	5489	gene-G4B84_000228	0.186008	0.765179	1
GO:0006538	glutamate catabolic process	BP	1	1	1021	5489	gene-G4B84_002774	0.186008	0.765179	1
GO:0006545	glycine biosynthetic process	BP	1	1	1021	5489	gene-G4B84_010963	0.186008	0.765179	1
GO:0006582	melanin metabolic process	BP	1	1	1021	5489	gene-G4B84_006186	0.186008	0.765179	1
GO:0006684	sphingomyelin metabolic process	BP	1	1	1021	5489	gene-G4B84_004996	0.186008	0.765179	1
GO:0006685	sphingomyelin catabolic process	BP	1	1	1021	5489	gene-G4B84_004996	0.186008	0.765179	1
GO:0006688	glycosphingolipid biosynthetic process	BP	1	1	1021	5489	gene-G4B84_001007	0.186008	0.765179	1
GO:0006722	triterpenoid metabolic process	BP	1	1	1021	5489	gene-G4B84_002365	0.186008	0.765179	1
GO:0006825	copper ion transport	BP	1	1	1021	5489	gene-G4B84_008497	0.186008	0.765179	1
GO:0006835	dicarboxylic acid transport	BP	1	1	1021	5489	gene-G4B84_001739	0.186008	0.765179	1
GO:0007019	microtubule depolymerization	BP	1	1	1021	5489	gene-G4B84_008549	0.186008	0.765179	1
GO:0007038	endocytosed protein transport to vacuole	BP	1	1	1021	5489	gene-G4B84_001007	0.186008	0.765179	1
GO:0009411	response to UV	BP	1	1	1021	5489	gene-G4B84_000722	0.186008	0.765179	1
GO:0009443	pyridoxal 5'-phosphate salvage	BP	1	1	1021	5489	gene-G4B84_001354	0.186008	0.765179	1
GO:0009581	detection of external stimulus	BP	1	1	1021	5489	gene-G4B84_010091	0.186008	0.765179	1
GO:0009582	detection of abiotic stimulus	BP	1	1	1021	5489	gene-G4B84_010091	0.186008	0.765179	1
GO:0009583	detection of light stimulus	BP	1	1	1021	5489	gene-G4B84_010091	0.186008	0.765179	1
GO:0009584	detection of visible light	BP	1	1	1021	5489	gene-G4B84_010091	0.186008	0.765179	1
GO:0010038	response to metal ion	BP	1	1	1021	5489	gene-G4B84_000137	0.186008	0.765179	1
GO:0010039	response to iron ion	BP	1	1	1021	5489	gene-G4B84_000137	0.186008	0.765179	1
GO:0010566	regulation of ketone biosynthetic process	BP	1	1	1021	5489	gene-G4B84_008860	0.186008	0.765179	1
GO:0010793	regulation of mRNA export from nucleus	BP	1	1	1021	5489	gene-G4B84_000625	0.186008	0.765179	1
GO:0015689	molybdate ion transport	BP	1	1	1021	5489	gene-G4B84_010644	0.186008	0.765179	1
GO:0015740	C4-dicarboxylate transport	BP	1	1	1021	5489	gene-G4B84_001739	0.186008	0.765179	1
GO:0015743	malate transport	BP	1	1	1021	5489	gene-G4B84_001739	0.186008	0.765179	1
GO:0015780	nucleotide-sugar transmembrane transport	BP	1	1	1021	5489	gene-G4B84_000349	0.186008	0.765179	1
GO:0015786	UDP-glucose transmembrane transport	BP	1	1	1021	5489	gene-G4B84_000349	0.186008	0.765179	1
GO:0015802	basic amino acid transport	BP	1	1	1021	5489	gene-G4B84_007738	0.186008	0.765179	1
GO:0015858	nucleoside transport	BP	1	1	1021	5489	gene-G4B84_003176	0.186008	0.765179	1
GO:0016104	triterpenoid biosynthetic process	BP	1	1	1021	5489	gene-G4B84_002365	0.186008	0.765179	1
GO:0017198	N-terminal peptidyl-serine acetylation	BP	1	1	1021	5489	gene-G4B84_003698	0.186008	0.765179	1
GO:0018107	peptidyl-threonine phosphorylation	BP	1	1	1021	5489	gene-G4B84_005298	0.186008	0.765179	1
GO:0018210	peptidyl-threonine modification	BP	1	1	1021	5489	gene-G4B84_005298	0.186008	0.765179	1
GO:0018293	protein-FAD linkage	BP	1	1	1021	5489	gene-G4B84_000228	0.186008	0.765179	1
GO:0018298	protein-chromophore linkage	BP	1	1	1021	5489	gene-G4B84_010091	0.186008	0.765179	1
GO:0019520	aldonic acid metabolic process	BP	1	1	1021	5489	gene-G4B84_003679	0.186008	0.765179	1
GO:0019521	D-gluconate metabolic process	BP	1	1	1021	5489	gene-G4B84_003679	0.186008	0.765179	1
GO:0019551	glutamate catabolic process to 2-oxoglutarate	BP	1	1	1021	5489	gene-G4B84_002774	0.186008	0.765179	1
GO:0019722	calcium-mediated signaling	BP	1	1	1021	5489	gene-G4B84_005511	0.186008	0.765179	1
GO:0019744	hopanoid metabolic process	BP	1	1	1021	5489	gene-G4B84_002365	0.186008	0.765179	1
GO:0019746	hopanoid biosynthetic process	BP	1	1	1021	5489	gene-G4B84_002365	0.186008	0.765179	1
GO:0019915	lipid storage	BP	1	1	1021	5489	gene-G4B84_000309	0.186008	0.765179	1
GO:0030653	beta-lactam antibiotic metabolic process	BP	1	1	1021	5489	gene-G4B84_010044	0.186008	0.765179	1
GO:0030920	peptidyl-serine acetylation	BP	1	1	1021	5489	gene-G4B84_003698	0.186008	0.765179	1
GO:0030968	endoplasmic reticulum unfolded protein response	BP	1	1	1021	5489	gene-G4B84_008257	0.186008	0.765179	1
GO:0032239	regulation of nucleobase-containing compound transport	BP	1	1	1021	5489	gene-G4B84_000625	0.186008	0.765179	1
GO:0032386	regulation of intracellular transport	BP	1	1	1021	5489	gene-G4B84_000625	0.186008	0.765179	1
GO:0032887	regulation of spindle elongation	BP	1	1	1021	5489	gene-G4B84_008549	0.186008	0.765179	1
GO:0032888	regulation of mitotic spindle elongation	BP	1	1	1021	5489	gene-G4B84_008549	0.186008	0.765179	1
GO:0033157	regulation of intracellular protein transport	BP	1	1	1021	5489	gene-G4B84_000625	0.186008	0.765179	1
GO:0033244	regulation of penicillin metabolic process	BP	1	1	1021	5489	gene-G4B84_010044	0.186008	0.765179	1
GO:0033246	positive regulation of penicillin metabolic process	BP	1	1	1021	5489	gene-G4B84_010044	0.186008	0.765179	1
GO:0034251	regulation of cellular amide catabolic process	BP	1	1	1021	5489	gene-G4B84_000755	0.186008	0.765179	1
GO:0034253	positive regulation of cellular amide catabolic process	BP	1	1	1021	5489	gene-G4B84_000755	0.186008	0.765179	1
GO:0034254	regulation of urea catabolic process	BP	1	1	1021	5489	gene-G4B84_000755	0.186008	0.765179	1
GO:0034255	regulation of urea metabolic process	BP	1	1	1021	5489	gene-G4B84_000755	0.186008	0.765179	1
GO:0034309	primary alcohol biosynthetic process	BP	1	1	1021	5489	gene-G4B84_008860	0.186008	0.765179	1
GO:0034395	regulation of transcription from RNA polymerase II promoter in response to iron	BP	1	1	1021	5489	gene-G4B84_000137	0.186008	0.765179	1
GO:0034396	negative regulation of transcription from RNA polymerase II promoter in response to iron	BP	1	1	1021	5489	gene-G4B84_000137	0.186008	0.765179	1
GO:0034486	vacuolar transmembrane transport	BP	1	1	1021	5489	gene-G4B84_004878	0.186008	0.765179	1
GO:0034620	cellular response to unfolded protein	BP	1	1	1021	5489	gene-G4B84_008257	0.186008	0.765179	1
GO:0034644	cellular response to UV	BP	1	1	1021	5489	gene-G4B84_000722	0.186008	0.765179	1
GO:0035434	copper ion transmembrane transport	BP	1	1	1021	5489	gene-G4B84_008497	0.186008	0.765179	1
GO:0035999	tetrahydrofolate interconversion	BP	1	1	1021	5489	gene-G4B84_006864	0.186008	0.765179	1
GO:0042136	neurotransmitter biosynthetic process	BP	1	1	1021	5489	gene-G4B84_010963	0.186008	0.765179	1
GO:0042316	penicillin metabolic process	BP	1	1	1021	5489	gene-G4B84_010044	0.186008	0.765179	1
GO:0042762	regulation of sulfur metabolic process	BP	1	1	1021	5489	gene-G4B84_010044	0.186008	0.765179	1
GO:0043649	dicarboxylic acid catabolic process	BP	1	1	1021	5489	gene-G4B84_002774	0.186008	0.765179	1
GO:0044783	G1 DNA damage checkpoint	BP	1	1	1021	5489	gene-G4B84_008596	0.186008	0.765179	1
GO:0045023	G0 to G1 transition	BP	1	1	1021	5489	gene-G4B84_000859	0.186008	0.765179	1
GO:0045048	protein insertion into ER membrane	BP	1	1	1021	5489	gene-G4B84_003392	0.186008	0.765179	1
GO:0045143	homologous chromosome segregation	BP	1	1	1021	5489	gene-G4B84_005298	0.186008	0.765179	1
GO:0045764	positive regulation of cellular amino acid metabolic process	BP	1	1	1021	5489	gene-G4B84_000755	0.186008	0.765179	1
GO:0046176	aldonic acid catabolic process	BP	1	1	1021	5489	gene-G4B84_003679	0.186008	0.765179	1
GO:0046177	D-gluconate catabolic process	BP	1	1	1021	5489	gene-G4B84_003679	0.186008	0.765179	1
GO:0046653	tetrahydrofolate metabolic process	BP	1	1	1021	5489	gene-G4B84_006864	0.186008	0.765179	1
GO:0046685	response to arsenic-containing substance	BP	1	1	1021	5489	gene-G4B84_011150	0.186008	0.765179	1
GO:0046822	regulation of nucleocytoplasmic transport	BP	1	1	1021	5489	gene-G4B84_000625	0.186008	0.765179	1
GO:0046825	regulation of protein export from nucleus	BP	1	1	1021	5489	gene-G4B84_000625	0.186008	0.765179	1
GO:0046831	regulation of RNA export from nucleus	BP	1	1	1021	5489	gene-G4B84_000625	0.186008	0.765179	1
GO:0046950	cellular ketone body metabolic process	BP	1	1	1021	5489	gene-G4B84_000173	0.186008	0.765179	1
GO:0046952	ketone body catabolic process	BP	1	1	1021	5489	gene-G4B84_000173	0.186008	0.765179	1
GO:0051176	positive regulation of sulfur metabolic process	BP	1	1	1021	5489	gene-G4B84_010044	0.186008	0.765179	1
GO:0051223	regulation of protein transport	BP	1	1	1021	5489	gene-G4B84_000625	0.186008	0.765179	1
GO:0051228	mitotic spindle disassembly	BP	1	1	1021	5489	gene-G4B84_008549	0.186008	0.765179	1
GO:0051409	response to nitrosative stress	BP	1	1	1021	5489	gene-G4B84_006034	0.186008	0.765179	1
GO:0051999	mannosyl-inositol phosphorylceramide biosynthetic process	BP	1	1	1021	5489	gene-G4B84_001007	0.186008	0.765179	1
GO:0060236	regulation of mitotic spindle organization	BP	1	1	1021	5489	gene-G4B84_008549	0.186008	0.765179	1
GO:0070201	regulation of establishment of protein localization	BP	1	1	1021	5489	gene-G4B84_000625	0.186008	0.765179	1
GO:0070316	regulation of G0 to G1 transition	BP	1	1	1021	5489	gene-G4B84_000859	0.186008	0.765179	1
GO:0070317	negative regulation of G0 to G1 transition	BP	1	1	1021	5489	gene-G4B84_000859	0.186008	0.765179	1
GO:0070462	plus-end specific microtubule depolymerization	BP	1	1	1021	5489	gene-G4B84_008549	0.186008	0.765179	1
GO:0070932	histone H3 deacetylation	BP	1	1	1021	5489	gene-G4B84_000730	0.186008	0.765179	1
GO:0071243	cellular response to arsenic-containing substance	BP	1	1	1021	5489	gene-G4B84_011150	0.186008	0.765179	1
GO:0071248	cellular response to metal ion	BP	1	1	1021	5489	gene-G4B84_000137	0.186008	0.765179	1
GO:0071281	cellular response to iron ion	BP	1	1	1021	5489	gene-G4B84_000137	0.186008	0.765179	1
GO:0071417	cellular response to organonitrogen compound	BP	1	1	1021	5489	gene-G4B84_000755	0.186008	0.765179	1
GO:0071423	malate transmembrane transport	BP	1	1	1021	5489	gene-G4B84_001739	0.186008	0.765179	1
GO:0071478	cellular response to radiation	BP	1	1	1021	5489	gene-G4B84_000722	0.186008	0.765179	1
GO:0071482	cellular response to light stimulus	BP	1	1	1021	5489	gene-G4B84_000722	0.186008	0.765179	1
GO:0072334	UDP-galactose transmembrane transport	BP	1	1	1021	5489	gene-G4B84_000349	0.186008	0.765179	1
GO:0072338	cellular lactam metabolic process	BP	1	1	1021	5489	gene-G4B84_010044	0.186008	0.765179	1
GO:0090087	regulation of peptide transport	BP	1	1	1021	5489	gene-G4B84_000625	0.186008	0.765179	1
GO:0090224	regulation of spindle organization	BP	1	1	1021	5489	gene-G4B84_008549	0.186008	0.765179	1
GO:0090293	nitrogen catabolite regulation of transcription	BP	1	1	1021	5489	gene-G4B84_000755	0.186008	0.765179	1
GO:0090294	nitrogen catabolite activation of transcription	BP	1	1	1021	5489	gene-G4B84_000755	0.186008	0.765179	1
GO:0090481	pyrimidine nucleotide-sugar transmembrane transport	BP	1	1	1021	5489	gene-G4B84_000349	0.186008	0.765179	1
GO:1900034	regulation of cellular response to heat	BP	1	1	1021	5489	gene-G4B84_000625	0.186008	0.765179	1
GO:1900376	regulation of secondary metabolite biosynthetic process	BP	1	1	1021	5489	gene-G4B84_008860	0.186008	0.765179	1
GO:1900378	positive regulation of secondary metabolite biosynthetic process	BP	1	1	1021	5489	gene-G4B84_008860	0.186008	0.765179	1
GO:1900394	regulation of kojic acid biosynthetic process	BP	1	1	1021	5489	gene-G4B84_008860	0.186008	0.765179	1
GO:1900396	positive regulation of kojic acid biosynthetic process	BP	1	1	1021	5489	gene-G4B84_008860	0.186008	0.765179	1
GO:1901568	fatty acid derivative metabolic process	BP	1	1	1021	5489	gene-G4B84_000173	0.186008	0.765179	1
GO:1901569	fatty acid derivative catabolic process	BP	1	1	1021	5489	gene-G4B84_000173	0.186008	0.765179	1
GO:1901642	nucleoside transmembrane transport	BP	1	1	1021	5489	gene-G4B84_003176	0.186008	0.765179	1
GO:1901699	cellular response to nitrogen compound	BP	1	1	1021	5489	gene-G4B84_000755	0.186008	0.765179	1
GO:1901714	positive regulation of urea catabolic process	BP	1	1	1021	5489	gene-G4B84_000755	0.186008	0.765179	1
GO:1901715	regulation of gamma-aminobutyric acid catabolic process	BP	1	1	1021	5489	gene-G4B84_000755	0.186008	0.765179	1
GO:1901717	positive regulation of gamma-aminobutyric acid catabolic process	BP	1	1	1021	5489	gene-G4B84_000755	0.186008	0.765179	1
GO:1902224	ketone body metabolic process	BP	1	1	1021	5489	gene-G4B84_000173	0.186008	0.765179	1
GO:1902390	regulation of N-terminal peptidyl-serine acetylation	BP	1	1	1021	5489	gene-G4B84_003698	0.186008	0.765179	1
GO:1902391	positive regulation of N-terminal peptidyl-serine acetylation	BP	1	1	1021	5489	gene-G4B84_003698	0.186008	0.765179	1
GO:1902476	chloride transmembrane transport	BP	1	1	1021	5489	gene-G4B84_004878	0.186008	0.765179	1
GO:1902930	regulation of alcohol biosynthetic process	BP	1	1	1021	5489	gene-G4B84_008860	0.186008	0.765179	1
GO:1902932	positive regulation of alcohol biosynthetic process	BP	1	1	1021	5489	gene-G4B84_008860	0.186008	0.765179	1
GO:1903314	regulation of nitrogen cycle metabolic process	BP	1	1	1021	5489	gene-G4B84_000755	0.186008	0.765179	1
GO:1903316	positive regulation of nitrogen cycle metabolic process	BP	1	1	1021	5489	gene-G4B84_000755	0.186008	0.765179	1
GO:1990443	peptidyl-threonine autophosphorylation	BP	1	1	1021	5489	gene-G4B84_005298	0.186008	0.765179	1
GO:2000197	regulation of ribonucleoprotein complex localization	BP	1	1	1021	5489	gene-G4B84_000625	0.186008	0.765179	1
GO:2000728	regulation of mRNA export from nucleus in response to heat stress	BP	1	1	1021	5489	gene-G4B84_000625	0.186008	0.765179	1
GO:2001316	kojic acid metabolic process	BP	1	1	1021	5489	gene-G4B84_008860	0.186008	0.765179	1
GO:2001317	kojic acid biosynthetic process	BP	1	1	1021	5489	gene-G4B84_008860	0.186008	0.765179	1
GO:0001134	transcription regulator recruiting activity	MF	1	1	1021	5489	gene-G4B84_000755	0.186008	0.765179	1
GO:0001135	RNA polymerase II transcription regulator recruiting activity	MF	1	1	1021	5489	gene-G4B84_000755	0.186008	0.765179	1
GO:0003838	sterol 24-C-methyltransferase activity	MF	1	1	1021	5489	gene-G4B84_006699	0.186008	0.765179	1
GO:0003854	3-beta-hydroxy-delta5-steroid dehydrogenase activity	MF	1	1	1021	5489	gene-G4B84_006251	0.186008	0.765179	1
GO:0003867	4-aminobutyrate transaminase activity	MF	1	1	1021	5489	gene-G4B84_008052	0.186008	0.765179	1
GO:0003868	4-hydroxyphenylpyruvate dioxygenase activity	MF	1	1	1021	5489	gene-G4B84_002972	0.186008	0.765179	1
GO:0003877	ATP adenylyltransferase activity	MF	1	1	1021	5489	gene-G4B84_007903	0.186008	0.765179	1
GO:0003959	NADPH dehydrogenase activity	MF	1	1	1021	5489	gene-G4B84_004582	0.186008	0.765179	1
GO:0003978	UDP-glucose 4-epimerase activity	MF	1	1	1021	5489	gene-G4B84_011953	0.186008	0.765179	1
GO:0003997	acyl-CoA oxidase activity	MF	1	1	1021	5489	gene-G4B84_012279	0.186008	0.765179	1
GO:0004047	aminomethyltransferase activity	MF	1	1	1021	5489	gene-G4B84_009832	0.186008	0.765179	1
GO:0004053	arginase activity	MF	1	1	1021	5489	gene-G4B84_003402	0.186008	0.765179	1
GO:0004109	coproporphyrinogen oxidase activity	MF	1	1	1021	5489	gene-G4B84_006760	0.186008	0.765179	1
GO:0004146	dihydrofolate reductase activity	MF	1	1	1021	5489	gene-G4B84_010963	0.186008	0.765179	1
GO:0004342	glucosamine-6-phosphate deaminase activity	MF	1	1	1021	5489	gene-G4B84_011653	0.186008	0.765179	1
GO:0004352	glutamate dehydrogenase (NAD+) activity	MF	1	1	1021	5489	gene-G4B84_002774	0.186008	0.765179	1
GO:0004353	glutamate dehydrogenase [NAD(P)+] activity	MF	1	1	1021	5489	gene-G4B84_002774	0.186008	0.765179	1
GO:0004399	histidinol dehydrogenase activity	MF	1	1	1021	5489	gene-G4B84_003207	0.186008	0.765179	1
GO:0004435	phosphatidylinositol phospholipase C activity	MF	1	1	1021	5489	gene-G4B84_006370	0.186008	0.765179	1
GO:0004467	long-chain fatty acid-CoA ligase activity	MF	1	1	1021	5489	gene-G4B84_000670	0.186008	0.765179	1
GO:0004488	methylenetetrahydrofolate dehydrogenase (NADP+) activity	MF	1	1	1021	5489	gene-G4B84_000127	0.186008	0.765179	1
GO:0004489	methylenetetrahydrofolate reductase (NAD(P)H) activity	MF	1	1	1021	5489	gene-G4B84_006864	0.186008	0.765179	1
GO:0004555	alpha,alpha-trehalase activity	MF	1	1	1021	5489	gene-G4B84_000188	0.186008	0.765179	1
GO:0004556	alpha-amylase activity	MF	1	1	1021	5489	gene-G4B84_004098	0.186008	0.765179	1
GO:0004592	pantoate-beta-alanine ligase activity	MF	1	1	1021	5489	gene-G4B84_005171	0.186008	0.765179	1
GO:0004629	phospholipase C activity	MF	1	1	1021	5489	gene-G4B84_006370	0.186008	0.765179	1
GO:0004634	phosphopyruvate hydratase activity	MF	1	1	1021	5489	gene-G4B84_002853	0.186008	0.765179	1
GO:0004635	phosphoribosyl-AMP cyclohydrolase activity	MF	1	1	1021	5489	gene-G4B84_003207	0.186008	0.765179	1
GO:0004636	phosphoribosyl-ATP diphosphatase activity	MF	1	1	1021	5489	gene-G4B84_003207	0.186008	0.765179	1
GO:0004645	phosphorylase activity	MF	1	1	1021	5489	gene-G4B84_006407	0.186008	0.765179	1
GO:0004767	sphingomyelin phosphodiesterase activity	MF	1	1	1021	5489	gene-G4B84_004996	0.186008	0.765179	1
GO:0004807	triose-phosphate isomerase activity	MF	1	1	1021	5489	gene-G4B84_005333	0.186008	0.765179	1
GO:0004830	tryptophan-tRNA ligase activity	MF	1	1	1021	5489	gene-G4B84_006229	0.186008	0.765179	1
GO:0005310	dicarboxylic acid transmembrane transporter activity	MF	1	1	1021	5489	gene-G4B84_001739	0.186008	0.765179	1
GO:0005324	long-chain fatty acid transporter activity	MF	1	1	1021	5489	gene-G4B84_000670	0.186008	0.765179	1
GO:0005337	nucleoside transmembrane transporter activity	MF	1	1	1021	5489	gene-G4B84_003176	0.186008	0.765179	1
GO:0005338	nucleotide-sugar transmembrane transporter activity	MF	1	1	1021	5489	gene-G4B84_000349	0.186008	0.765179	1
GO:0005375	copper ion transmembrane transporter activity	MF	1	1	1021	5489	gene-G4B84_008497	0.186008	0.765179	1
GO:0005459	UDP-galactose transmembrane transporter activity	MF	1	1	1021	5489	gene-G4B84_000349	0.186008	0.765179	1
GO:0005544	calcium-dependent phospholipid binding	MF	1	1	1021	5489	gene-G4B84_009325	0.186008	0.765179	1
GO:0008184	glycogen phosphorylase activity	MF	1	1	1021	5489	gene-G4B84_006407	0.186008	0.765179	1
GO:0008260	3-oxoacid CoA-transferase activity	MF	1	1	1021	5489	gene-G4B84_000173	0.186008	0.765179	1
GO:0008410	CoA-transferase activity	MF	1	1	1021	5489	gene-G4B84_000173	0.186008	0.765179	1
GO:0008478	pyridoxal kinase activity	MF	1	1	1021	5489	gene-G4B84_001354	0.186008	0.765179	1
GO:0008553	proton-exporting ATPase activity, phosphorylative mechanism	MF	1	1	1021	5489	gene-G4B84_009231	0.186008	0.765179	1
GO:0008574	ATP-dependent microtubule motor activity, plus-end-directed	MF	1	1	1021	5489	gene-G4B84_008549	0.186008	0.765179	1
GO:0008941	nitric oxide dioxygenase activity	MF	1	1	1021	5489	gene-G4B84_006034	0.186008	0.765179	1
GO:0009013	succinate-semialdehyde dehydrogenase [NAD(P)+] activity	MF	1	1	1021	5489	gene-G4B84_004842	0.186008	0.765179	1
GO:0009881	photoreceptor activity	MF	1	1	1021	5489	gene-G4B84_010091	0.186008	0.765179	1
GO:0010698	acetyltransferase activator activity	MF	1	1	1021	5489	gene-G4B84_003698	0.186008	0.765179	1
GO:0015098	molybdate ion transmembrane transporter activity	MF	1	1	1021	5489	gene-G4B84_010644	0.186008	0.765179	1
GO:0015140	malate transmembrane transporter activity	MF	1	1	1021	5489	gene-G4B84_001739	0.186008	0.765179	1
GO:0015165	pyrimidine nucleotide-sugar transmembrane transporter activity	MF	1	1	1021	5489	gene-G4B84_000349	0.186008	0.765179	1
GO:0015296	anion:cation symporter activity	MF	1	1	1021	5489	gene-G4B84_004878	0.186008	0.765179	1
GO:0015377	cation:chloride symporter activity	MF	1	1	1021	5489	gene-G4B84_004878	0.186008	0.765179	1
GO:0015379	potassium:chloride symporter activity	MF	1	1	1021	5489	gene-G4B84_004878	0.186008	0.765179	1
GO:0015556	C4-dicarboxylate transmembrane transporter activity	MF	1	1	1021	5489	gene-G4B84_001739	0.186008	0.765179	1
GO:0015645	fatty acid ligase activity	MF	1	1	1021	5489	gene-G4B84_000670	0.186008	0.765179	1
GO:0015927	trehalase activity	MF	1	1	1021	5489	gene-G4B84_000188	0.186008	0.765179	1
GO:0015930	glutamate synthase activity	MF	1	1	1021	5489	gene-G4B84_006752	0.186008	0.765179	1
GO:0016040	glutamate synthase (NADH) activity	MF	1	1	1021	5489	gene-G4B84_006752	0.186008	0.765179	1
GO:0016160	amylase activity	MF	1	1	1021	5489	gene-G4B84_004098	0.186008	0.765179	1
GO:0016229	steroid dehydrogenase activity	MF	1	1	1021	5489	gene-G4B84_006251	0.186008	0.765179	1
GO:0016312	inositol bisphosphate phosphatase activity	MF	1	1	1021	5489	gene-G4B84_005081	0.186008	0.765179	1
GO:0016827	hydrolase activity, acting on acid carbon-phosphorus bonds	MF	1	1	1021	5489	gene-G4B84_008728	0.186008	0.765179	1
GO:0017136	NAD-dependent histone deacetylase activity	MF	1	1	1021	5489	gene-G4B84_000730	0.186008	0.765179	1
GO:0018548	pentaerythritol trinitrate reductase activity	MF	1	1	1021	5489	gene-G4B84_004582	0.186008	0.765179	1
GO:0030411	scytalone dehydratase activity	MF	1	1	1021	5489	gene-G4B84_006186	0.186008	0.765179	1
GO:0030487	inositol-4,5-bisphosphate 5-phosphatase activity	MF	1	1	1021	5489	gene-G4B84_005081	0.186008	0.765179	1
GO:0031078	histone deacetylase activity (H3-K14 specific)	MF	1	1	1021	5489	gene-G4B84_000730	0.186008	0.765179	1
GO:0031151	histone methyltransferase activity (H3-K79 specific)	MF	1	1	1021	5489	gene-G4B84_008596	0.186008	0.765179	1
GO:0031493	nucleosomal histone binding	MF	1	1	1021	5489	gene-G4B84_008596	0.186008	0.765179	1
GO:0031957	very long-chain fatty acid-CoA ligase activity	MF	1	1	1021	5489	gene-G4B84_000670	0.186008	0.765179	1
GO:0032041	NAD-dependent histone deacetylase activity (H3-K14 specific)	MF	1	1	1021	5489	gene-G4B84_000730	0.186008	0.765179	1
GO:0033764	steroid dehydrogenase activity, acting on the CH-OH group of donors, NAD or NADP as acceptor	MF	1	1	1021	5489	gene-G4B84_006251	0.186008	0.765179	1
GO:0033971	hydroxyisourate hydrolase activity	MF	1	1	1021	5489	gene-G4B84_003391	0.186008	0.765179	1
GO:0034485	phosphatidylinositol-3,4,5-trisphosphate 5-phosphatase activity	MF	1	1	1021	5489	gene-G4B84_005081	0.186008	0.765179	1
GO:0034594	phosphatidylinositol trisphosphate phosphatase activity	MF	1	1	1021	5489	gene-G4B84_005081	0.186008	0.765179	1
GO:0034979	NAD-dependent protein deacetylase activity	MF	1	1	1021	5489	gene-G4B84_000730	0.186008	0.765179	1
GO:0045129	NAD-independent histone deacetylase activity	MF	1	1	1021	5489	gene-G4B84_000730	0.186008	0.765179	1
GO:0045181	glutamate synthase activity, NAD(P)H as acceptor	MF	1	1	1021	5489	gene-G4B84_006752	0.186008	0.765179	1
GO:0045290	D-arabinose 1-dehydrogenase [NAD(P)+] activity	MF	1	1	1021	5489	gene-G4B84_001961	0.186008	0.765179	1
GO:0045547	dehydrodolichyl diphosphate synthase activity	MF	1	1	1021	5489	gene-G4B84_003745	0.186008	0.765179	1
GO:0046030	inositol trisphosphate phosphatase activity	MF	1	1	1021	5489	gene-G4B84_005081	0.186008	0.765179	1
GO:0046316	gluconokinase activity	MF	1	1	1021	5489	gene-G4B84_003679	0.186008	0.765179	1
GO:0046576	rhamnogalacturonan alpha-L-rhamnopyranosyl-(1->4)-alpha-D-galactopyranosyluronide lyase activity	MF	1	1	1021	5489	gene-G4B84_009644	0.186008	0.765179	1
GO:0046992	oxidoreductase activity, acting on X-H and Y-H to form an X-Y bond	MF	1	1	1021	5489	gene-G4B84_005813	0.186008	0.765179	1
GO:0047145	demethylsterigmatocystin 6-O-methyltransferase activity	MF	1	1	1021	5489	gene-G4B84_005794	0.186008	0.765179	1
GO:0047400	phosphonoacetate hydrolase activity	MF	1	1	1021	5489	gene-G4B84_008728	0.186008	0.765179	1
GO:0050151	oleate hydratase activity	MF	1	1	1021	5489	gene-G4B84_005709	0.186008	0.765179	1
GO:0050262	ribosylnicotinamide kinase activity	MF	1	1	1021	5489	gene-G4B84_003786	0.186008	0.765179	1
GO:0050448	beta-cyclopiazonate dehydrogenase activity	MF	1	1	1021	5489	gene-G4B84_005813	0.186008	0.765179	1
GO:0052658	inositol-1,4,5-trisphosphate 5-phosphatase activity	MF	1	1	1021	5489	gene-G4B84_005081	0.186008	0.765179	1
GO:0052659	inositol-1,3,4,5-tetrakisphosphate 5-phosphatase activity	MF	1	1	1021	5489	gene-G4B84_005081	0.186008	0.765179	1
GO:0052690	trichloro-p-hydroquinone reductive dehalogenase activity	MF	1	1	1021	5489	gene-G4B84_004582	0.186008	0.765179	1
GO:0052743	inositol tetrakisphosphate phosphatase activity	MF	1	1	1021	5489	gene-G4B84_005081	0.186008	0.765179	1
GO:0052745	inositol phosphate phosphatase activity	MF	1	1	1021	5489	gene-G4B84_005081	0.186008	0.765179	1
GO:0052761	exo-1,4-beta-D-glucosaminidase activity	MF	1	1	1021	5489	gene-G4B84_004023	0.186008	0.765179	1
GO:0052827	inositol pentakisphosphate phosphatase activity	MF	1	1	1021	5489	gene-G4B84_005081	0.186008	0.765179	1
GO:0070463	tubulin-dependent ATPase activity	MF	1	1	1021	5489	gene-G4B84_008549	0.186008	0.765179	1
GO:1990640	inositol-2,4,5-triphosphate 5-phosphatase activity	MF	1	1	1021	5489	gene-G4B84_005081	0.186008	0.765179	1
GO:1990648	inositol-4,5,6-triphosphate 5-phosphatase activity	MF	1	1	1021	5489	gene-G4B84_005081	0.186008	0.765179	1
GO:1990649	inositol-1,2,4,5-tetrakisphosphate 5-phosphatase activity	MF	1	1	1021	5489	gene-G4B84_005081	0.186008	0.765179	1
GO:1990650	inositol-2,4,5,6-tetrakisphosphate 5-phosphatase activity	MF	1	1	1021	5489	gene-G4B84_005081	0.186008	0.765179	1
GO:1990651	inositol-1,2,4,5,6-pentakisphosphate 5-phosphatase activity	MF	1	1	1021	5489	gene-G4B84_005081	0.186008	0.765179	1
GO:1990939	ATP-dependent microtubule motor activity	MF	1	1	1021	5489	gene-G4B84_008549	0.186008	0.765179	1
GO:0000015	phosphopyruvate hydratase complex	CC	1	1	1021	5489	gene-G4B84_002853	0.186008	0.765179	1
GO:0001527	microfibril	CC	1	1	1021	5489	gene-G4B84_008663	0.186008	0.765179	1
GO:0005880	nuclear microtubule	CC	1	1	1021	5489	gene-G4B84_008549	0.186008	0.765179	1
GO:0005881	cytoplasmic microtubule	CC	1	1	1021	5489	gene-G4B84_008549	0.186008	0.765179	1
GO:0030121	AP-1 adaptor complex	CC	1	1	1021	5489	gene-G4B84_000859	0.186008	0.765179	1
GO:0031166	integral component of vacuolar membrane	CC	1	1	1021	5489	gene-G4B84_004878	0.186008	0.765179	1
GO:0031205	endoplasmic reticulum Sec complex	CC	1	1	1021	5489	gene-G4B84_011632	0.186008	0.765179	1
GO:0031207	Sec62/Sec63 complex	CC	1	1	1021	5489	gene-G4B84_011632	0.186008	0.765179	1
GO:0031235	intrinsic component of the cytoplasmic side of the plasma membrane	CC	1	1	1021	5489	gene-G4B84_000670	0.186008	0.765179	1
GO:0031983	vesicle lumen	CC	1	1	1021	5489	gene-G4B84_003206	0.186008	0.765179	1
GO:0032588	trans-Golgi network membrane	CC	1	1	1021	5489	gene-G4B84_001007	0.186008	0.765179	1
GO:0033106	cis-Golgi network membrane	CC	1	1	1021	5489	gene-G4B84_001007	0.186008	0.765179	1
GO:0034099	luminal surveillance complex	CC	1	1	1021	5489	gene-G4B84_003015	0.186008	0.765179	1
GO:0043564	Ku70:Ku80 complex	CC	1	1	1021	5489	gene-G4B84_007635	0.186008	0.765179	1
GO:0044420	extracellular matrix component	CC	1	1	1021	5489	gene-G4B84_008663	0.186008	0.765179	1
GO:0060205	cytoplasmic vesicle lumen	CC	1	1	1021	5489	gene-G4B84_003206	0.186008	0.765179	1
GO:0097361	CIA complex	CC	1	1	1021	5489	gene-G4B84_000617	0.186008	0.765179	1
GO:0090407	organophosphate biosynthetic process	BP	24	108	1021	5489	gene-G4B84_001976,gene-G4B84_002054,gene-G4B84_005333,gene-G4B84_006112,gene-G4B84_002853,gene-G4B84_001176,gene-G4B84_009231,gene-G4B84_003688,gene-G4B84_006005,gene-G4B84_007043,gene-G4B84_009653,gene-G4B84_011294,gene-G4B84_012178,gene-G4B84_010963,gene-G4B84_004093,gene-G4B84_004094,gene-G4B84_003881,gene-G4B84_001354,gene-G4B84_004714,gene-G4B84_003786,gene-G4B84_004088,gene-G4B84_005081,gen…	0.195117	0.795815	0.222222
GO:0009110	vitamin biosynthetic process	BP	5	17	1021	5489	gene-G4B84_011944,gene-G4B84_001354,gene-G4B84_001788,gene-G4B84_002669,gene-G4B84_005171	0.195692	0.795815	0.294118
GO:0009251	glucan catabolic process	BP	5	17	1021	5489	gene-G4B84_001573,gene-G4B84_002619,gene-G4B84_007503,gene-G4B84_008019,gene-G4B84_012262	0.195692	0.795815	0.294118
GO:0042180	cellular ketone metabolic process	BP	5	17	1021	5489	gene-G4B84_010670,gene-G4B84_007820,gene-G4B84_010044,gene-G4B84_008860,gene-G4B84_000755	0.195692	0.795815	0.294118
GO:0042364	water-soluble vitamin biosynthetic process	BP	5	17	1021	5489	gene-G4B84_011944,gene-G4B84_001354,gene-G4B84_001788,gene-G4B84_002669,gene-G4B84_005171	0.195692	0.795815	0.294118
GO:0044247	cellular polysaccharide catabolic process	BP	5	17	1021	5489	gene-G4B84_001573,gene-G4B84_002619,gene-G4B84_007503,gene-G4B84_008019,gene-G4B84_012262	0.195692	0.795815	0.294118
GO:0009150	purine ribonucleotide metabolic process	BP	13	55	1021	5489	gene-G4B84_001523,gene-G4B84_001976,gene-G4B84_002054,gene-G4B84_005333,gene-G4B84_006112,gene-G4B84_002853,gene-G4B84_000228,gene-G4B84_001001,gene-G4B84_009231,gene-G4B84_002463,gene-G4B84_011428,gene-G4B84_004714,gene-G4B84_004088	0.210632	0.850519	0.236364
GO:0140013	meiotic nuclear division	BP	4	13	1021	5489	gene-G4B84_005298,gene-G4B84_000345,gene-G4B84_000730,gene-G4B84_008596	0.210737	0.850519	0.307692
GO:0016684	oxidoreductase activity, acting on peroxide as acceptor	MF	4	13	1021	5489	gene-G4B84_008381,gene-G4B84_010740,gene-G4B84_011728,gene-G4B84_003656	0.210737	0.850519	0.307692
GO:0016860	intramolecular oxidoreductase activity	MF	4	13	1021	5489	gene-G4B84_011653,gene-G4B84_004812,gene-G4B84_005332,gene-G4B84_005333	0.210737	0.850519	0.307692
GO:0008171	O-methyltransferase activity	MF	6	22	1021	5489	gene-G4B84_005794,gene-G4B84_005729,gene-G4B84_007718,gene-G4B84_007982,gene-G4B84_010232,gene-G4B84_010000	0.212769	0.857099	0.272727
GO:1901137	carbohydrate derivative biosynthetic process	BP	18	80	1021	5489	gene-G4B84_001976,gene-G4B84_002054,gene-G4B84_005333,gene-G4B84_006112,gene-G4B84_002853,gene-G4B84_001858,gene-G4B84_003206,gene-G4B84_003409,gene-G4B84_003745,gene-G4B84_008150,gene-G4B84_001968,gene-G4B84_001176,gene-G4B84_009231,gene-G4B84_004812,gene-G4B84_004714,gene-G4B84_008555,gene-G4B84_009950,gene-G4B84_001007	0.220415	0.886227	0.225
GO:0000160	phosphorelay signal transduction system	BP	3	9	1021	5489	gene-G4B84_009385,gene-G4B84_010091,gene-G4B84_010350	0.225423	0.889548	0.333333
GO:0009403	toxin biosynthetic process	BP	3	9	1021	5489	gene-G4B84_005794,gene-G4B84_005801,gene-G4B84_005804	0.225423	0.889548	0.333333
GO:0009404	toxin metabolic process	BP	3	9	1021	5489	gene-G4B84_005794,gene-G4B84_005801,gene-G4B84_005804	0.225423	0.889548	0.333333
GO:0051445	regulation of meiotic cell cycle	BP	3	9	1021	5489	gene-G4B84_000345,gene-G4B84_000730,gene-G4B84_008596	0.225423	0.889548	0.333333
GO:0004650	polygalacturonase activity	MF	3	9	1021	5489	gene-G4B84_004353,gene-G4B84_004551,gene-G4B84_009644	0.225423	0.889548	0.333333
GO:0015103	inorganic anion transmembrane transporter activity	MF	3	9	1021	5489	gene-G4B84_011836,gene-G4B84_010644,gene-G4B84_004878	0.225423	0.889548	0.333333
GO:0008270	zinc ion binding	MF	66	325	1021	5489	gene-G4B84_000755,gene-G4B84_000858,gene-G4B84_000966,gene-G4B84_001167,gene-G4B84_001598,gene-G4B84_001712,gene-G4B84_001735,gene-G4B84_001743,gene-G4B84_001801,gene-G4B84_001934,gene-G4B84_002058,gene-G4B84_002267,gene-G4B84_002627,gene-G4B84_003207,gene-G4B84_003654,gene-G4B84_003971,gene-G4B84_003993,gene-G4B84_004092,gene-G4B84_004405,gene-G4B84_004427,gene-G4B84_004428,gene-G4B84_004599,gen…	0.227261	0.889548	0.203077
GO:0009259	ribonucleotide metabolic process	BP	13	56	1021	5489	gene-G4B84_001523,gene-G4B84_001976,gene-G4B84_002054,gene-G4B84_005333,gene-G4B84_006112,gene-G4B84_002853,gene-G4B84_000228,gene-G4B84_001001,gene-G4B84_009231,gene-G4B84_002463,gene-G4B84_011428,gene-G4B84_004714,gene-G4B84_004088	0.230754	0.889548	0.232143
GO:0005996	monosaccharide metabolic process	BP	5	18	1021	5489	gene-G4B84_011953,gene-G4B84_005333,gene-G4B84_007467,gene-G4B84_011596,gene-G4B84_002370	0.232215	0.889548	0.277778
GO:0030258	lipid modification	BP	5	18	1021	5489	gene-G4B84_012279,gene-G4B84_011046,gene-G4B84_011159,gene-G4B84_005081,gene-G4B84_007087	0.232215	0.889548	0.277778
GO:0000302	response to reactive oxygen species	BP	2	5	1021	5489	gene-G4B84_008381,gene-G4B84_008675	0.234296	0.889548	0.4
GO:0006694	steroid biosynthetic process	BP	2	5	1021	5489	gene-G4B84_006699,gene-G4B84_006251	0.234296	0.889548	0.4
GO:0006760	folic acid-containing compound metabolic process	BP	2	5	1021	5489	gene-G4B84_000127,gene-G4B84_006864	0.234296	0.889548	0.4
GO:0009395	phospholipid catabolic process	BP	2	5	1021	5489	gene-G4B84_004996,gene-G4B84_004784	0.234296	0.889548	0.4
GO:0034614	cellular response to reactive oxygen species	BP	2	5	1021	5489	gene-G4B84_008381,gene-G4B84_008675	0.234296	0.889548	0.4
GO:0035690	cellular response to drug	BP	2	5	1021	5489	gene-G4B84_008381,gene-G4B84_008675	0.234296	0.889548	0.4
GO:0035967	cellular response to topologically incorrect protein	BP	2	5	1021	5489	gene-G4B84_008257,gene-G4B84_008178	0.234296	0.889548	0.4
GO:0042822	pyridoxal phosphate metabolic process	BP	2	5	1021	5489	gene-G4B84_001354,gene-G4B84_011944	0.234296	0.889548	0.4
GO:0042823	pyridoxal phosphate biosynthetic process	BP	2	5	1021	5489	gene-G4B84_001354,gene-G4B84_011944	0.234296	0.889548	0.4
GO:0046184	aldehyde biosynthetic process	BP	2	5	1021	5489	gene-G4B84_001354,gene-G4B84_011944	0.234296	0.889548	0.4
GO:0046677	response to antibiotic	BP	2	5	1021	5489	gene-G4B84_008381,gene-G4B84_008675	0.234296	0.889548	0.4
GO:0051187	cofactor catabolic process	BP	2	5	1021	5489	gene-G4B84_010740,gene-G4B84_011728	0.234296	0.889548	0.4
GO:0004420	hydroxymethylglutaryl-CoA reductase (NADPH) activity	MF	2	5	1021	5489	gene-G4B84_002463,gene-G4B84_011428	0.234296	0.889548	0.4
GO:0005319	lipid transporter activity	MF	2	5	1021	5489	gene-G4B84_000670,gene-G4B84_008397	0.234296	0.889548	0.4
GO:0005385	zinc ion transmembrane transporter activity	MF	2	5	1021	5489	gene-G4B84_002027,gene-G4B84_003919	0.234296	0.889548	0.4
GO:0008061	chitin binding	MF	2	5	1021	5489	gene-G4B84_004417,gene-G4B84_010458	0.234296	0.889548	0.4
GO:0016813	hydrolase activity, acting on carbon-nitrogen (but not peptide) bonds, in linear amidines	MF	2	5	1021	5489	gene-G4B84_003402,gene-G4B84_002751	0.234296	0.889548	0.4
GO:0042054	histone methyltransferase activity	MF	2	5	1021	5489	gene-G4B84_009862,gene-G4B84_008596	0.234296	0.889548	0.4
GO:0046912	transferase activity, transferring acyl groups, acyl groups converted into alkyl on transfer	MF	2	5	1021	5489	gene-G4B84_011931,gene-G4B84_004383	0.234296	0.889548	0.4
GO:0072509	divalent inorganic cation transmembrane transporter activity	MF	2	5	1021	5489	gene-G4B84_002027,gene-G4B84_003919	0.234296	0.889548	0.4
GO:0005811	lipid droplet	CC	2	5	1021	5489	gene-G4B84_000670,gene-G4B84_006699	0.234296	0.889548	0.4
GO:0072521	purine-containing compound metabolic process	BP	15	66	1021	5489	gene-G4B84_001523,gene-G4B84_001976,gene-G4B84_002054,gene-G4B84_005333,gene-G4B84_006112,gene-G4B84_002853,gene-G4B84_000228,gene-G4B84_003391,gene-G4B84_004428,gene-G4B84_001001,gene-G4B84_009231,gene-G4B84_002463,gene-G4B84_011428,gene-G4B84_004714,gene-G4B84_004088	0.234574	0.889548	0.227273
GO:1901135	carbohydrate derivative metabolic process	BP	30	142	1021	5489	gene-G4B84_010458,gene-G4B84_011653,gene-G4B84_002588,gene-G4B84_001523,gene-G4B84_001976,gene-G4B84_002054,gene-G4B84_005333,gene-G4B84_006112,gene-G4B84_002853,gene-G4B84_000228,gene-G4B84_001858,gene-G4B84_003206,gene-G4B84_003409,gene-G4B84_003745,gene-G4B84_008150,gene-G4B84_001968,gene-G4B84_001176,gene-G4B84_001001,gene-G4B84_009231,gene-G4B84_003116,gene-G4B84_004032,gene-G4B84_010169,gen…	0.246281	0.932286	0.211268
GO:0000981	DNA-binding transcription factor activity, RNA polymerase II-specific	MF	28	132	1021	5489	gene-G4B84_000755,gene-G4B84_000966,gene-G4B84_001167,gene-G4B84_001598,gene-G4B84_001735,gene-G4B84_001743,gene-G4B84_002267,gene-G4B84_002627,gene-G4B84_003654,gene-G4B84_004427,gene-G4B84_004626,gene-G4B84_004955,gene-G4B84_005753,gene-G4B84_005804,gene-G4B84_005816,gene-G4B84_006027,gene-G4B84_006544,gene-G4B84_008471,gene-G4B84_008780,gene-G4B84_008860,gene-G4B84_009009,gene-G4B84_009683,gen…	0.248356	0.938478	0.212121
GO:0032259	methylation	BP	22	102	1021	5489	gene-G4B84_008555,gene-G4B84_009065,gene-G4B84_008596,gene-G4B84_009862,gene-G4B84_001788,gene-G4B84_002391,gene-G4B84_002669,gene-G4B84_002970,gene-G4B84_004228,gene-G4B84_004733,gene-G4B84_005660,gene-G4B84_005729,gene-G4B84_005730,gene-G4B84_005794,gene-G4B84_005905,gene-G4B84_006699,gene-G4B84_007718,gene-G4B84_007982,gene-G4B84_009832,gene-G4B84_010232,gene-G4B84_010233,gene-G4B84_010000	0.253354	0.942992	0.215686
GO:0008168	methyltransferase activity	MF	22	102	1021	5489	gene-G4B84_006699,gene-G4B84_009832,gene-G4B84_005729,gene-G4B84_007718,gene-G4B84_007982,gene-G4B84_010232,gene-G4B84_010000,gene-G4B84_008555,gene-G4B84_009065,gene-G4B84_009862,gene-G4B84_008596,gene-G4B84_005794,gene-G4B84_001788,gene-G4B84_002391,gene-G4B84_002669,gene-G4B84_002970,gene-G4B84_004228,gene-G4B84_004733,gene-G4B84_005660,gene-G4B84_005730,gene-G4B84_005905,gene-G4B84_010233	0.253354	0.942992	0.215686
GO:0023014	signal transduction by protein phosphorylation	BP	4	14	1021	5489	gene-G4B84_000730,gene-G4B84_009385,gene-G4B84_010091,gene-G4B84_010350	0.254486	0.942992	0.285714
GO:0044550	secondary metabolite biosynthetic process	BP	4	14	1021	5489	gene-G4B84_005794,gene-G4B84_005801,gene-G4B84_005804,gene-G4B84_008860	0.254486	0.942992	0.285714
GO:0008081	phosphoric diester hydrolase activity	MF	4	14	1021	5489	gene-G4B84_006370,gene-G4B84_004996,gene-G4B84_003517,gene-G4B84_005238	0.254486	0.942992	0.285714
GO:0016209	antioxidant activity	MF	4	14	1021	5489	gene-G4B84_008381,gene-G4B84_010740,gene-G4B84_011728,gene-G4B84_003656	0.254486	0.942992	0.285714
GO:0006766	vitamin metabolic process	BP	5	19	1021	5489	gene-G4B84_011944,gene-G4B84_001354,gene-G4B84_001788,gene-G4B84_002669,gene-G4B84_005171	0.270453	0.942992	0.263158
GO:0006767	water-soluble vitamin metabolic process	BP	5	19	1021	5489	gene-G4B84_011944,gene-G4B84_001354,gene-G4B84_001788,gene-G4B84_002669,gene-G4B84_005171	0.270453	0.942992	0.263158
GO:0010948	negative regulation of cell cycle process	BP	5	19	1021	5489	gene-G4B84_000625,gene-G4B84_000345,gene-G4B84_000730,gene-G4B84_008596,gene-G4B84_000859	0.270453	0.942992	0.263158
GO:0044262	cellular carbohydrate metabolic process	BP	11	48	1021	5489	gene-G4B84_000188,gene-G4B84_001573,gene-G4B84_002619,gene-G4B84_007503,gene-G4B84_008019,gene-G4B84_012262,gene-G4B84_009950,gene-G4B84_003679,gene-G4B84_001976,gene-G4B84_002054,gene-G4B84_006112	0.270797	0.942992	0.229167
GO:0006163	purine nucleotide metabolic process	BP	13	58	1021	5489	gene-G4B84_001523,gene-G4B84_001976,gene-G4B84_002054,gene-G4B84_005333,gene-G4B84_006112,gene-G4B84_002853,gene-G4B84_000228,gene-G4B84_001001,gene-G4B84_009231,gene-G4B84_002463,gene-G4B84_011428,gene-G4B84_004714,gene-G4B84_004088	0.27313	0.942992	0.224138
GO:0016836	hydro-lyase activity	MF	6	24	1021	5489	gene-G4B84_009899,gene-G4B84_011309,gene-G4B84_003150,gene-G4B84_002853,gene-G4B84_006186,gene-G4B84_005709	0.28013	0.942992	0.25
GO:0007018	microtubule-based movement	BP	3	10	1021	5489	gene-G4B84_008549,gene-G4B84_007689,gene-G4B84_008706	0.280312	0.942992	0.3
GO:0009605	response to external stimulus	BP	3	10	1021	5489	gene-G4B84_000755,gene-G4B84_010091,gene-G4B84_002552	0.280312	0.942992	0.3
GO:0019321	pentose metabolic process	BP	3	10	1021	5489	gene-G4B84_007467,gene-G4B84_011596,gene-G4B84_002370	0.280312	0.942992	0.3
GO:0043624	cellular protein complex disassembly	BP	3	10	1021	5489	gene-G4B84_008315,gene-G4B84_008107,gene-G4B84_008549	0.280312	0.942992	0.3
GO:0044242	cellular lipid catabolic process	BP	3	10	1021	5489	gene-G4B84_012279,gene-G4B84_004996,gene-G4B84_004784	0.280312	0.942992	0.3
GO:0046835	carbohydrate phosphorylation	BP	3	10	1021	5489	gene-G4B84_001976,gene-G4B84_002054,gene-G4B84_006112	0.280312	0.942992	0.3
GO:0003774	motor activity	MF	3	10	1021	5489	gene-G4B84_007689,gene-G4B84_008706,gene-G4B84_008549	0.280312	0.942992	0.3
GO:0048029	monosaccharide binding	MF	3	10	1021	5489	gene-G4B84_001976,gene-G4B84_002054,gene-G4B84_006112	0.280312	0.942992	0.3
GO:0016741	transferase activity, transferring one-carbon groups	MF	23	109	1021	5489	gene-G4B84_006699,gene-G4B84_001788,gene-G4B84_002669,gene-G4B84_009832,gene-G4B84_002391,gene-G4B84_002970,gene-G4B84_004228,gene-G4B84_004733,gene-G4B84_005660,gene-G4B84_005730,gene-G4B84_005905,gene-G4B84_010233,gene-G4B84_005729,gene-G4B84_007718,gene-G4B84_007982,gene-G4B84_010232,gene-G4B84_010000,gene-G4B84_008555,gene-G4B84_009065,gene-G4B84_000128,gene-G4B84_009862,gene-G4B84_008596,gen…	0.284217	0.942992	0.211009
GO:0050661	NADP binding	MF	7	29	1021	5489	gene-G4B84_000488,gene-G4B84_003924,gene-G4B84_009719,gene-G4B84_010177,gene-G4B84_010917,gene-G4B84_010963,gene-G4B84_000066	0.286276	0.942992	0.241379
GO:0052689	carboxylic ester hydrolase activity	MF	7	29	1021	5489	gene-G4B84_004784,gene-G4B84_006187,gene-G4B84_008311,gene-G4B84_008359,gene-G4B84_002656,gene-G4B84_004266,gene-G4B84_010371	0.286276	0.942992	0.241379
GO:0016569	covalent chromatin modification	BP	8	34	1021	5489	gene-G4B84_003362,gene-G4B84_004919,gene-G4B84_005224,gene-G4B84_000345,gene-G4B84_011149,gene-G4B84_008596,gene-G4B84_009862,gene-G4B84_000730	0.29024	0.942992	0.235294
GO:0016570	histone modification	BP	8	34	1021	5489	gene-G4B84_003362,gene-G4B84_004919,gene-G4B84_005224,gene-G4B84_000345,gene-G4B84_011149,gene-G4B84_008596,gene-G4B84_009862,gene-G4B84_000730	0.29024	0.942992	0.235294
GO:0019439	aromatic compound catabolic process	BP	13	59	1021	5489	gene-G4B84_001976,gene-G4B84_002054,gene-G4B84_005333,gene-G4B84_006112,gene-G4B84_002853,gene-G4B84_004428,gene-G4B84_010182,gene-G4B84_007820,gene-G4B84_010172,gene-G4B84_001561,gene-G4B84_001734,gene-G4B84_003881,gene-G4B84_008097	0.295225	0.942992	0.220339
GO:0006979	response to oxidative stress	BP	4	15	1021	5489	gene-G4B84_008381,gene-G4B84_008675,gene-G4B84_010740,gene-G4B84_011728	0.299824	0.942992	0.266667
GO:1901617	organic hydroxy compound biosynthetic process	BP	4	15	1021	5489	gene-G4B84_006699,gene-G4B84_011944,gene-G4B84_001354,gene-G4B84_008860	0.299824	0.942992	0.266667
GO:0008422	beta-glucosidase activity	MF	4	15	1021	5489	gene-G4B84_002619,gene-G4B84_007503,gene-G4B84_008019,gene-G4B84_012262	0.299824	0.942992	0.266667
GO:0034404	nucleobase-containing small molecule biosynthetic process	BP	5	20	1021	5489	gene-G4B84_001976,gene-G4B84_002054,gene-G4B84_005333,gene-G4B84_006112,gene-G4B84_002853	0.309892	0.942992	0.25
GO:0051273	beta-glucan metabolic process	BP	5	20	1021	5489	gene-G4B84_001573,gene-G4B84_002619,gene-G4B84_007503,gene-G4B84_008019,gene-G4B84_012262	0.309892	0.942992	0.25
GO:0015926	glucosidase activity	MF	5	20	1021	5489	gene-G4B84_002619,gene-G4B84_007503,gene-G4B84_008019,gene-G4B84_012262,gene-G4B84_001091	0.309892	0.942992	0.25
GO:0006301	postreplication repair	BP	2	6	1021	5489	gene-G4B84_000722,gene-G4B84_008596	0.310275	0.942992	0.333333
GO:0007007	inner mitochondrial membrane organization	BP	2	6	1021	5489	gene-G4B84_002602,gene-G4B84_006697	0.310275	0.942992	0.333333
GO:0009820	alkaloid metabolic process	BP	2	6	1021	5489	gene-G4B84_005814,gene-G4B84_010910	0.310275	0.942992	0.333333
GO:0042181	ketone biosynthetic process	BP	2	6	1021	5489	gene-G4B84_010670,gene-G4B84_008860	0.310275	0.942992	0.333333
GO:0042558	pteridine-containing compound metabolic process	BP	2	6	1021	5489	gene-G4B84_000127,gene-G4B84_006864	0.310275	0.942992	0.333333
GO:0042816	vitamin B6 metabolic process	BP	2	6	1021	5489	gene-G4B84_011944,gene-G4B84_001354	0.310275	0.942992	0.333333
GO:0042819	vitamin B6 biosynthetic process	BP	2	6	1021	5489	gene-G4B84_011944,gene-G4B84_001354	0.310275	0.942992	0.333333
GO:0046165	alcohol biosynthetic process	BP	2	6	1021	5489	gene-G4B84_006699,gene-G4B84_008860	0.310275	0.942992	0.333333
GO:0046839	phospholipid dephosphorylation	BP	2	6	1021	5489	gene-G4B84_005081,gene-G4B84_007087	0.310275	0.942992	0.333333
GO:0046856	phosphatidylinositol dephosphorylation	BP	2	6	1021	5489	gene-G4B84_005081,gene-G4B84_007087	0.310275	0.942992	0.333333
GO:0003855	3-dehydroquinate dehydratase activity	MF	2	6	1021	5489	gene-G4B84_009899,gene-G4B84_011309	0.310275	0.942992	0.333333
GO:0016278	lysine N-methyltransferase activity	MF	2	6	1021	5489	gene-G4B84_009862,gene-G4B84_008596	0.310275	0.942992	0.333333
GO:0016279	protein-lysine N-methyltransferase activity	MF	2	6	1021	5489	gene-G4B84_009862,gene-G4B84_008596	0.310275	0.942992	0.333333
GO:0016653	oxidoreductase activity, acting on NAD(P)H, heme protein as acceptor	MF	2	6	1021	5489	gene-G4B84_004652,gene-G4B84_011050	0.310275	0.942992	0.333333
GO:0050364	tryptophan dimethylallyltransferase activity	MF	2	6	1021	5489	gene-G4B84_005814,gene-G4B84_010910	0.310275	0.942992	0.333333
GO:0070403	NAD+ binding	MF	2	6	1021	5489	gene-G4B84_001801,gene-G4B84_011139	0.310275	0.942992	0.333333
GO:0051783	regulation of nuclear division	BP	6	25	1021	5489	gene-G4B84_000625,gene-G4B84_002552,gene-G4B84_008549,gene-G4B84_000345,gene-G4B84_000730,gene-G4B84_008596	0.31546	0.942992	0.24
GO:0006820	anion transport	BP	13	60	1021	5489	gene-G4B84_006917,gene-G4B84_010294,gene-G4B84_007857,gene-G4B84_001850,gene-G4B84_011836,gene-G4B84_007756,gene-G4B84_010644,gene-G4B84_000349,gene-G4B84_007738,gene-G4B84_000670,gene-G4B84_008397,gene-G4B84_001739,gene-G4B84_004878	0.317813	0.942992	0.216667
GO:0019693	ribose phosphate metabolic process	BP	13	60	1021	5489	gene-G4B84_001523,gene-G4B84_001976,gene-G4B84_002054,gene-G4B84_005333,gene-G4B84_006112,gene-G4B84_002853,gene-G4B84_000228,gene-G4B84_001001,gene-G4B84_009231,gene-G4B84_002463,gene-G4B84_011428,gene-G4B84_004714,gene-G4B84_004088	0.317813	0.942992	0.216667
GO:0016835	carbon-oxygen lyase activity	MF	7	30	1021	5489	gene-G4B84_009899,gene-G4B84_011309,gene-G4B84_003150,gene-G4B84_002853,gene-G4B84_006186,gene-G4B84_009644,gene-G4B84_005709	0.318531	0.942992	0.233333
GO:0008654	phospholipid biosynthetic process	BP	9	40	1021	5489	gene-G4B84_001176,gene-G4B84_005081,gene-G4B84_001007,gene-G4B84_003688,gene-G4B84_006005,gene-G4B84_007043,gene-G4B84_009653,gene-G4B84_011294,gene-G4B84_012178	0.320638	0.942992	0.225
GO:0010243	response to organonitrogen compound	BP	3	11	1021	5489	gene-G4B84_000755,gene-G4B84_003015,gene-G4B84_003673	0.336175	0.942992	0.272727
GO:0034976	response to endoplasmic reticulum stress	BP	3	11	1021	5489	gene-G4B84_003015,gene-G4B84_003673,gene-G4B84_008257	0.336175	0.942992	0.272727
GO:1901698	response to nitrogen compound	BP	3	11	1021	5489	gene-G4B84_000755,gene-G4B84_003015,gene-G4B84_003673	0.336175	0.942992	0.272727
GO:0004190	aspartic-type endopeptidase activity	MF	3	11	1021	5489	gene-G4B84_000135,gene-G4B84_008330,gene-G4B84_012200	0.336175	0.942992	0.272727
GO:0070001	aspartic-type peptidase activity	MF	3	11	1021	5489	gene-G4B84_000135,gene-G4B84_008330,gene-G4B84_012200	0.336175	0.942992	0.272727
GO:0031224	intrinsic component of membrane	CC	227	1191	1021	5489	gene-G4B84_000045,gene-G4B84_000051,gene-G4B84_000073,gene-G4B84_000099,gene-G4B84_000111,gene-G4B84_000284,gene-G4B84_000309,gene-G4B84_000349,gene-G4B84_000359,gene-G4B84_000411,gene-G4B84_000488,gene-G4B84_000602,gene-G4B84_000670,gene-G4B84_000690,gene-G4B84_000864,gene-G4B84_000881,gene-G4B84_000901,gene-G4B84_000927,gene-G4B84_000942,gene-G4B84_001007,gene-G4B84_001031,gene-G4B84_001089,gen…	0.336573	0.942992	0.190596
GO:0000038	very long-chain fatty acid metabolic process	BP	1	2	1021	5489	gene-G4B84_000670	0.337445	0.942992	0.5
GO:0000741	karyogamy	BP	1	2	1021	5489	gene-G4B84_003015	0.337445	0.942992	0.5
GO:0000742	karyogamy involved in conjugation with cellular fusion	BP	1	2	1021	5489	gene-G4B84_003015	0.337445	0.942992	0.5
GO:0000972	transcription-dependent tethering of RNA polymerase II gene DNA at nuclear periphery	BP	1	2	1021	5489	gene-G4B84_000625	0.337445	0.942992	0.5
GO:0000973	posttranscriptional tethering of RNA polymerase II gene DNA at nuclear periphery	BP	1	2	1021	5489	gene-G4B84_000625	0.337445	0.942992	0.5
GO:0001676	long-chain fatty acid metabolic process	BP	1	2	1021	5489	gene-G4B84_000670	0.337445	0.942992	0.5
GO:0001732	formation of cytoplasmic translation initiation complex	BP	1	2	1021	5489	gene-G4B84_010956	0.337445	0.942992	0.5
GO:0006012	galactose metabolic process	BP	1	2	1021	5489	gene-G4B84_011953	0.337445	0.942992	0.5
GO:0006037	cell wall chitin metabolic process	BP	1	2	1021	5489	gene-G4B84_009950	0.337445	0.942992	0.5
GO:0006038	cell wall chitin biosynthetic process	BP	1	2	1021	5489	gene-G4B84_009950	0.337445	0.942992	0.5
GO:0006044	N-acetylglucosamine metabolic process	BP	1	2	1021	5489	gene-G4B84_011653	0.337445	0.942992	0.5
GO:0006067	ethanol metabolic process	BP	1	2	1021	5489	gene-G4B84_002058	0.337445	0.942992	0.5
GO:0006069	ethanol oxidation	BP	1	2	1021	5489	gene-G4B84_002058	0.337445	0.942992	0.5
GO:0006103	2-oxoglutarate metabolic process	BP	1	2	1021	5489	gene-G4B84_002774	0.337445	0.942992	0.5
GO:0006147	guanine catabolic process	BP	1	2	1021	5489	gene-G4B84_004428	0.337445	0.942992	0.5
GO:0006308	DNA catabolic process	BP	1	2	1021	5489	gene-G4B84_010182	0.337445	0.942992	0.5
GO:0006419	alanyl-tRNA aminoacylation	BP	1	2	1021	5489	gene-G4B84_011868	0.337445	0.942992	0.5
GO:0006436	tryptophanyl-tRNA aminoacylation	BP	1	2	1021	5489	gene-G4B84_006229	0.337445	0.942992	0.5
GO:0006449	regulation of translational termination	BP	1	2	1021	5489	gene-G4B84_008107	0.337445	0.942992	0.5
GO:0006616	SRP-dependent cotranslational protein targeting to membrane, translocation	BP	1	2	1021	5489	gene-G4B84_003015	0.337445	0.942992	0.5
GO:0006675	mannosyl-inositol phosphorylceramide metabolic process	BP	1	2	1021	5489	gene-G4B84_001007	0.337445	0.942992	0.5
GO:0006687	glycosphingolipid metabolic process	BP	1	2	1021	5489	gene-G4B84_001007	0.337445	0.942992	0.5
GO:0006696	ergosterol biosynthetic process	BP	1	2	1021	5489	gene-G4B84_006699	0.337445	0.942992	0.5
GO:0008204	ergosterol metabolic process	BP	1	2	1021	5489	gene-G4B84_006699	0.337445	0.942992	0.5
GO:0009226	nucleotide-sugar biosynthetic process	BP	1	2	1021	5489	gene-G4B84_004812	0.337445	0.942992	0.5
GO:0009298	GDP-mannose biosynthetic process	BP	1	2	1021	5489	gene-G4B84_004812	0.337445	0.942992	0.5
GO:0009313	oligosaccharide catabolic process	BP	1	2	1021	5489	gene-G4B84_000188	0.337445	0.942992	0.5
GO:0015908	fatty acid transport	BP	1	2	1021	5489	gene-G4B84_000670	0.337445	0.942992	0.5
GO:0015909	long-chain fatty acid transport	BP	1	2	1021	5489	gene-G4B84_000670	0.337445	0.942992	0.5
GO:0016128	phytosteroid metabolic process	BP	1	2	1021	5489	gene-G4B84_006699	0.337445	0.942992	0.5
GO:0016129	phytosteroid biosynthetic process	BP	1	2	1021	5489	gene-G4B84_006699	0.337445	0.942992	0.5
GO:0019673	GDP-mannose metabolic process	BP	1	2	1021	5489	gene-G4B84_004812	0.337445	0.942992	0.5
GO:0030042	actin filament depolymerization	BP	1	2	1021	5489	gene-G4B84_008315	0.337445	0.942992	0.5
GO:0030149	sphingolipid catabolic process	BP	1	2	1021	5489	gene-G4B84_004996	0.337445	0.942992	0.5
GO:0030473	nuclear migration along microtubule	BP	1	2	1021	5489	gene-G4B84_008549	0.337445	0.942992	0.5
GO:0031081	nuclear pore distribution	BP	1	2	1021	5489	gene-G4B84_000625	0.337445	0.942992	0.5
GO:0031110	regulation of microtubule polymerization or depolymerization	BP	1	2	1021	5489	gene-G4B84_008549	0.337445	0.942992	0.5
GO:0031111	negative regulation of microtubule polymerization or depolymerization	BP	1	2	1021	5489	gene-G4B84_008549	0.337445	0.942992	0.5
GO:0031113	regulation of microtubule polymerization	BP	1	2	1021	5489	gene-G4B84_008549	0.337445	0.942992	0.5
GO:0031115	negative regulation of microtubule polymerization	BP	1	2	1021	5489	gene-G4B84_008549	0.337445	0.942992	0.5
GO:0031396	regulation of protein ubiquitination	BP	1	2	1021	5489	gene-G4B84_002926	0.337445	0.942992	0.5
GO:0031590	wybutosine metabolic process	BP	1	2	1021	5489	gene-G4B84_008555	0.337445	0.942992	0.5
GO:0031591	wybutosine biosynthetic process	BP	1	2	1021	5489	gene-G4B84_008555	0.337445	0.942992	0.5
GO:0031990	mRNA export from nucleus in response to heat stress	BP	1	2	1021	5489	gene-G4B84_000625	0.337445	0.942992	0.5
GO:0032272	negative regulation of protein polymerization	BP	1	2	1021	5489	gene-G4B84_008549	0.337445	0.942992	0.5
GO:0032324	molybdopterin cofactor biosynthetic process	BP	1	2	1021	5489	gene-G4B84_004088	0.337445	0.942992	0.5
GO:0032872	regulation of stress-activated MAPK cascade	BP	1	2	1021	5489	gene-G4B84_000730	0.337445	0.942992	0.5
GO:0032874	positive regulation of stress-activated MAPK cascade	BP	1	2	1021	5489	gene-G4B84_000730	0.337445	0.942992	0.5
GO:0032889	regulation of vacuole fusion, non-autophagic	BP	1	2	1021	5489	gene-G4B84_008098	0.337445	0.942992	0.5
GO:0033313	meiotic cell cycle checkpoint	BP	1	2	1021	5489	gene-G4B84_008596	0.337445	0.942992	0.5
GO:0033494	ferulate metabolic process	BP	1	2	1021	5489	gene-G4B84_010172	0.337445	0.942992	0.5
GO:0034221	fungal-type cell wall chitin biosynthetic process	BP	1	2	1021	5489	gene-G4B84_009950	0.337445	0.942992	0.5
GO:0034729	histone H3-K79 methylation	BP	1	2	1021	5489	gene-G4B84_008596	0.337445	0.942992	0.5
GO:0043419	urea catabolic process	BP	1	2	1021	5489	gene-G4B84_000755	0.337445	0.942992	0.5
GO:0044088	regulation of vacuole organization	BP	1	2	1021	5489	gene-G4B84_008098	0.337445	0.942992	0.5
GO:0044108	cellular alcohol biosynthetic process	BP	1	2	1021	5489	gene-G4B84_006699	0.337445	0.942992	0.5
GO:0045947	negative regulation of translational initiation	BP	1	2	1021	5489	gene-G4B84_010956	0.337445	0.942992	0.5
GO:0046098	guanine metabolic process	BP	1	2	1021	5489	gene-G4B84_004428	0.337445	0.942992	0.5
GO:0046271	phenylpropanoid catabolic process	BP	1	2	1021	5489	gene-G4B84_010172	0.337445	0.942992	0.5
GO:0046281	cinnamic acid catabolic process	BP	1	2	1021	5489	gene-G4B84_010172	0.337445	0.942992	0.5
GO:0046352	disaccharide catabolic process	BP	1	2	1021	5489	gene-G4B84_000188	0.337445	0.942992	0.5
GO:0046466	membrane lipid catabolic process	BP	1	2	1021	5489	gene-G4B84_004996	0.337445	0.942992	0.5
GO:0051103	DNA ligation involved in DNA repair	BP	1	2	1021	5489	gene-G4B84_010954	0.337445	0.942992	0.5
GO:0051230	spindle disassembly	BP	1	2	1021	5489	gene-G4B84_008549	0.337445	0.942992	0.5
GO:0051598	meiotic recombination checkpoint	BP	1	2	1021	5489	gene-G4B84_008596	0.337445	0.942992	0.5
GO:0051606	detection of stimulus	BP	1	2	1021	5489	gene-G4B84_010091	0.337445	0.942992	0.5
GO:0051664	nuclear pore localization	BP	1	2	1021	5489	gene-G4B84_000625	0.337445	0.942992	0.5
GO:0051668	localization within membrane	BP	1	2	1021	5489	gene-G4B84_000625	0.337445	0.942992	0.5
GO:0055075	potassium ion homeostasis	BP	1	2	1021	5489	gene-G4B84_004878	0.337445	0.942992	0.5
GO:0070302	regulation of stress-activated protein kinase signaling cascade	BP	1	2	1021	5489	gene-G4B84_000730	0.337445	0.942992	0.5
GO:0070304	positive regulation of stress-activated protein kinase signaling cascade	BP	1	2	1021	5489	gene-G4B84_000730	0.337445	0.942992	0.5
GO:0070484	dehydro-D-arabinono-1,4-lactone metabolic process	BP	1	2	1021	5489	gene-G4B84_001961	0.337445	0.942992	0.5
GO:0070485	dehydro-D-arabinono-1,4-lactone biosynthetic process	BP	1	2	1021	5489	gene-G4B84_001961	0.337445	0.942992	0.5
GO:0071241	cellular response to inorganic substance	BP	1	2	1021	5489	gene-G4B84_000137	0.337445	0.942992	0.5
GO:0071629	cytoplasm protein quality control by the ubiquitin-proteasome system	BP	1	2	1021	5489	gene-G4B84_008178	0.337445	0.942992	0.5
GO:0097384	cellular lipid biosynthetic process	BP	1	2	1021	5489	gene-G4B84_006699	0.337445	0.942992	0.5
GO:0098661	inorganic anion transmembrane transport	BP	1	2	1021	5489	gene-G4B84_004878	0.337445	0.942992	0.5
GO:1901334	lactone metabolic process	BP	1	2	1021	5489	gene-G4B84_001961	0.337445	0.942992	0.5
GO:1901336	lactone biosynthetic process	BP	1	2	1021	5489	gene-G4B84_001961	0.337445	0.942992	0.5
GO:1902652	secondary alcohol metabolic process	BP	1	2	1021	5489	gene-G4B84_006699	0.337445	0.942992	0.5
GO:1902653	secondary alcohol biosynthetic process	BP	1	2	1021	5489	gene-G4B84_006699	0.337445	0.942992	0.5
GO:1902904	negative regulation of supramolecular fiber organization	BP	1	2	1021	5489	gene-G4B84_008549	0.337445	0.942992	0.5
GO:1903317	regulation of protein maturation	BP	1	2	1021	5489	gene-G4B84_003698	0.337445	0.942992	0.5
GO:1903319	positive regulation of protein maturation	BP	1	2	1021	5489	gene-G4B84_003698	0.337445	0.942992	0.5
GO:1903320	regulation of protein modification by small protein conjugation or removal	BP	1	2	1021	5489	gene-G4B84_002926	0.337445	0.942992	0.5
GO:0000774	adenyl-nucleotide exchange factor activity	MF	1	2	1021	5489	gene-G4B84_008178	0.337445	0.942992	0.5
GO:0001128	RNA polymerase II transcription coactivator activity involved in preinitiation complex assembly	MF	1	2	1021	5489	gene-G4B84_000755	0.337445	0.942992	0.5
GO:0003849	3-deoxy-7-phosphoheptulonate synthase activity	MF	1	2	1021	5489	gene-G4B84_004781	0.337445	0.942992	0.5
GO:0003994	aconitate hydratase activity	MF	1	2	1021	5489	gene-G4B84_003150	0.337445	0.942992	0.5
GO:0004311	farnesyltranstransferase activity	MF	1	2	1021	5489	gene-G4B84_012105	0.337445	0.942992	0.5
GO:0004363	glutathione synthase activity	MF	1	2	1021	5489	gene-G4B84_008060	0.337445	0.942992	0.5
GO:0004370	glycerol kinase activity	MF	1	2	1021	5489	gene-G4B84_002588	0.337445	0.942992	0.5
GO:0004375	glycine dehydrogenase (decarboxylating) activity	MF	1	2	1021	5489	gene-G4B84_010587	0.337445	0.942992	0.5
GO:0004414	homoserine O-acetyltransferase activity	MF	1	2	1021	5489	gene-G4B84_008026	0.337445	0.942992	0.5
GO:0004421	hydroxymethylglutaryl-CoA synthase activity	MF	1	2	1021	5489	gene-G4B84_011931	0.337445	0.942992	0.5
GO:0004439	phosphatidylinositol-4,5-bisphosphate 5-phosphatase activity	MF	1	2	1021	5489	gene-G4B84_005081	0.337445	0.942992	0.5
GO:0004476	mannose-6-phosphate isomerase activity	MF	1	2	1021	5489	gene-G4B84_004812	0.337445	0.942992	0.5
GO:0004560	alpha-L-fucosidase activity	MF	1	2	1021	5489	gene-G4B84_000074	0.337445	0.942992	0.5
GO:0004565	beta-galactosidase activity	MF	1	2	1021	5489	gene-G4B84_002842	0.337445	0.942992	0.5
GO:0004657	proline dehydrogenase activity	MF	1	2	1021	5489	gene-G4B84_008363	0.337445	0.942992	0.5
GO:0004751	ribose-5-phosphate isomerase activity	MF	1	2	1021	5489	gene-G4B84_005332	0.337445	0.942992	0.5
GO:0004813	alanine-tRNA ligase activity	MF	1	2	1021	5489	gene-G4B84_011868	0.337445	0.942992	0.5
GO:0005199	structural constituent of cell wall	MF	1	2	1021	5489	gene-G4B84_009069	0.337445	0.942992	0.5
GO:0005351	carbohydrate:proton symporter activity	MF	1	2	1021	5489	gene-G4B84_000411	0.337445	0.942992	0.5
GO:0005402	carbohydrate:cation symporter activity	MF	1	2	1021	5489	gene-G4B84_000411	0.337445	0.942992	0.5
GO:0008892	guanine deaminase activity	MF	1	2	1021	5489	gene-G4B84_004428	0.337445	0.942992	0.5
GO:0015144	carbohydrate transmembrane transporter activity	MF	1	2	1021	5489	gene-G4B84_000411	0.337445	0.942992	0.5
GO:0015928	fucosidase activity	MF	1	2	1021	5489	gene-G4B84_000074	0.337445	0.942992	0.5
GO:0016413	O-acetyltransferase activity	MF	1	2	1021	5489	gene-G4B84_008026	0.337445	0.942992	0.5
GO:0016642	oxidoreductase activity, acting on the CH-NH2 group of donors, disulfide as acceptor	MF	1	2	1021	5489	gene-G4B84_010587	0.337445	0.942992	0.5
GO:0016661	oxidoreductase activity, acting on other nitrogenous compounds as donors	MF	1	2	1021	5489	gene-G4B84_004582	0.337445	0.942992	0.5
GO:0016812	hydrolase activity, acting on carbon-nitrogen (but not peptide) bonds, in cyclic amides	MF	1	2	1021	5489	gene-G4B84_003391	0.337445	0.942992	0.5
GO:0016854	racemase and epimerase activity	MF	1	2	1021	5489	gene-G4B84_011953	0.337445	0.942992	0.5
GO:0016857	racemase and epimerase activity, acting on carbohydrates and derivatives	MF	1	2	1021	5489	gene-G4B84_011953	0.337445	0.942992	0.5
GO:0017176	phosphatidylinositol N-acetylglucosaminyltransferase activity	MF	1	2	1021	5489	gene-G4B84_001176	0.337445	0.942992	0.5
GO:0030600	feruloyl esterase activity	MF	1	2	1021	5489	gene-G4B84_002656	0.337445	0.942992	0.5
GO:0031491	nucleosome binding	MF	1	2	1021	5489	gene-G4B84_008596	0.337445	0.942992	0.5
GO:0034450	ubiquitin-ubiquitin ligase activity	MF	1	2	1021	5489	gene-G4B84_004923	0.337445	0.942992	0.5
GO:0038023	signaling receptor activity	MF	1	2	1021	5489	gene-G4B84_010091	0.337445	0.942992	0.5
GO:0042602	riboflavin reductase (NADPH) activity	MF	1	2	1021	5489	gene-G4B84_006034	0.337445	0.942992	0.5
GO:0043295	glutathione binding	MF	1	2	1021	5489	gene-G4B84_008060	0.337445	0.942992	0.5
GO:0051903	S-(hydroxymethyl)glutathione dehydrogenase activity	MF	1	2	1021	5489	gene-G4B84_002058	0.337445	0.942992	0.5
GO:0070628	proteasome binding	MF	1	2	1021	5489	gene-G4B84_011150	0.337445	0.942992	0.5
GO:0090599	alpha-glucosidase activity	MF	1	2	1021	5489	gene-G4B84_001091	0.337445	0.942992	0.5
GO:0106019	phosphatidylinositol-4,5-bisphosphate phosphatase activity	MF	1	2	1021	5489	gene-G4B84_005081	0.337445	0.942992	0.5
GO:1900750	oligopeptide binding	MF	1	2	1021	5489	gene-G4B84_008060	0.337445	0.942992	0.5
GO:0005788	endoplasmic reticulum lumen	CC	1	2	1021	5489	gene-G4B84_003015	0.337445	0.942992	0.5
GO:0005801	cis-Golgi network	CC	1	2	1021	5489	gene-G4B84_001007	0.337445	0.942992	0.5
GO:0009898	cytoplasmic side of plasma membrane	CC	1	2	1021	5489	gene-G4B84_000670	0.337445	0.942992	0.5
GO:0012510	trans-Golgi network transport vesicle membrane	CC	1	2	1021	5489	gene-G4B84_000859	0.337445	0.942992	0.5
GO:0030125	clathrin vesicle coat	CC	1	2	1021	5489	gene-G4B84_000859	0.337445	0.942992	0.5
GO:0030130	clathrin coat of trans-Golgi network vesicle	CC	1	2	1021	5489	gene-G4B84_000859	0.337445	0.942992	0.5
GO:0030131	clathrin adaptor complex	CC	1	2	1021	5489	gene-G4B84_000859	0.337445	0.942992	0.5
GO:0030140	trans-Golgi network transport vesicle	CC	1	2	1021	5489	gene-G4B84_000859	0.337445	0.942992	0.5
GO:0030665	clathrin-coated vesicle membrane	CC	1	2	1021	5489	gene-G4B84_000859	0.337445	0.942992	0.5
GO:0031012	extracellular matrix	CC	1	2	1021	5489	gene-G4B84_008663	0.337445	0.942992	0.5
GO:0031310	intrinsic component of vacuolar membrane	CC	1	2	1021	5489	gene-G4B84_004878	0.337445	0.942992	0.5
GO:0034045	phagophore assembly site membrane	CC	1	2	1021	5489	gene-G4B84_006711	0.337445	0.942992	0.5
GO:0098552	side of membrane	CC	1	2	1021	5489	gene-G4B84_000670	0.337445	0.942992	0.5
GO:0098562	cytoplasmic side of membrane	CC	1	2	1021	5489	gene-G4B84_000670	0.337445	0.942992	0.5
GO:0016021	integral component of membrane	CC	226	1186	1021	5489	gene-G4B84_002946,gene-G4B84_004878,gene-G4B84_002602,gene-G4B84_006697,gene-G4B84_000045,gene-G4B84_000051,gene-G4B84_000073,gene-G4B84_000099,gene-G4B84_000111,gene-G4B84_000284,gene-G4B84_000309,gene-G4B84_000349,gene-G4B84_000359,gene-G4B84_000411,gene-G4B84_000488,gene-G4B84_000602,gene-G4B84_000670,gene-G4B84_000690,gene-G4B84_000864,gene-G4B84_000881,gene-G4B84_000901,gene-G4B84_000927,gen…	0.33848	0.944647	0.190556
GO:0016811	hydrolase activity, acting on carbon-nitrogen (but not peptide) bonds, in linear amides	MF	4	16	1021	5489	gene-G4B84_007820,gene-G4B84_011149,gene-G4B84_000730,gene-G4B84_001801	0.345968	0.964283	0.25
GO:0070887	cellular response to chemical stimulus	BP	10	46	1021	5489	gene-G4B84_000755,gene-G4B84_008257,gene-G4B84_000137,gene-G4B84_008381,gene-G4B84_008675,gene-G4B84_011150,gene-G4B84_008178,gene-G4B84_003656,gene-G4B84_010740,gene-G4B84_011728	0.347233	0.966547	0.217391
GO:1901615	organic hydroxy compound metabolic process	BP	7	31	1021	5489	gene-G4B84_002058,gene-G4B84_006186,gene-G4B84_006699,gene-G4B84_011944,gene-G4B84_001354,gene-G4B84_010172,gene-G4B84_008860	0.35136	0.975653	0.225806
GO:0044264	cellular polysaccharide metabolic process	BP	6	26	1021	5489	gene-G4B84_001573,gene-G4B84_002619,gene-G4B84_007503,gene-G4B84_008019,gene-G4B84_012262,gene-G4B84_009950	0.351418	0.975653	0.230769
GO:0042623	ATPase activity, coupled	MF	13	62	1021	5489	gene-G4B84_000722,gene-G4B84_007635,gene-G4B84_004710,gene-G4B84_001169,gene-G4B84_006515,gene-G4B84_009684,gene-G4B84_009741,gene-G4B84_009858,gene-G4B84_004091,gene-G4B84_007294,gene-G4B84_008397,gene-G4B84_009231,gene-G4B84_008549	0.364113	1	0.209677
GO:1901293	nucleoside phosphate biosynthetic process	BP	12	57	1021	5489	gene-G4B84_001976,gene-G4B84_002054,gene-G4B84_005333,gene-G4B84_006112,gene-G4B84_002853,gene-G4B84_009231,gene-G4B84_010963,gene-G4B84_004093,gene-G4B84_004094,gene-G4B84_003881,gene-G4B84_004714,gene-G4B84_003786	0.367453	1	0.210526
GO:0003700	DNA-binding transcription factor activity	MF	31	156	1021	5489	gene-G4B84_000755,gene-G4B84_000966,gene-G4B84_001167,gene-G4B84_001598,gene-G4B84_001735,gene-G4B84_001743,gene-G4B84_002267,gene-G4B84_002627,gene-G4B84_003654,gene-G4B84_004427,gene-G4B84_004626,gene-G4B84_004955,gene-G4B84_005753,gene-G4B84_005804,gene-G4B84_005816,gene-G4B84_006027,gene-G4B84_006544,gene-G4B84_008471,gene-G4B84_008780,gene-G4B84_008860,gene-G4B84_009009,gene-G4B84_009683,gen…	0.37146	1	0.198718
GO:0008152	metabolic process	BP	539	2870	1021	5489	gene-G4B84_000670,gene-G4B84_010954,gene-G4B84_007181,gene-G4B84_011149,gene-G4B84_003207,gene-G4B84_004465,gene-G4B84_002181,gene-G4B84_002842,gene-G4B84_004023,gene-G4B84_007948,gene-G4B84_010353,gene-G4B84_011915,gene-G4B84_012266,gene-G4B84_002475,gene-G4B84_010686,gene-G4B84_000720,gene-G4B84_001308,gene-G4B84_007635,gene-G4B84_000722,gene-G4B84_008596,gene-G4B84_000755,gene-G4B84_006312,gen…	0.373335	1	0.187805
GO:0055086	nucleobase-containing small molecule metabolic process	BP	24	120	1021	5489	gene-G4B84_001523,gene-G4B84_001976,gene-G4B84_002054,gene-G4B84_005333,gene-G4B84_006112,gene-G4B84_002853,gene-G4B84_000228,gene-G4B84_003391,gene-G4B84_004428,gene-G4B84_001001,gene-G4B84_009231,gene-G4B84_003116,gene-G4B84_004032,gene-G4B84_010169,gene-G4B84_010963,gene-G4B84_004093,gene-G4B84_004094,gene-G4B84_004812,gene-G4B84_003881,gene-G4B84_002463,gene-G4B84_011428,gene-G4B84_004714,gen…	0.381558	1	0.2
GO:0006144	purine nucleobase metabolic process	BP	2	7	1021	5489	gene-G4B84_004428,gene-G4B84_003391	0.384505	1	0.285714
GO:0006749	glutathione metabolic process	BP	2	7	1021	5489	gene-G4B84_008060,gene-G4B84_008768	0.384505	1	0.285714
GO:0008202	steroid metabolic process	BP	2	7	1021	5489	gene-G4B84_006251,gene-G4B84_006699	0.384505	1	0.285714
GO:0018958	phenol-containing compound metabolic process	BP	2	7	1021	5489	gene-G4B84_006186,gene-G4B84_010172	0.384505	1	0.285714
GO:0030010	establishment of cell polarity	BP	2	7	1021	5489	gene-G4B84_008549,gene-G4B84_009497	0.384505	1	0.285714
GO:0034968	histone lysine methylation	BP	2	7	1021	5489	gene-G4B84_008596,gene-G4B84_009862	0.384505	1	0.285714
GO:0043531	ADP binding	MF	2	7	1021	5489	gene-G4B84_004032,gene-G4B84_003408	0.384505	1	0.285714
GO:0005669	transcription factor TFIID complex	CC	2	7	1021	5489	gene-G4B84_005224,gene-G4B84_006230	0.384505	1	0.285714
GO:0070085	glycosylation	BP	6	27	1021	5489	gene-G4B84_001858,gene-G4B84_003206,gene-G4B84_003409,gene-G4B84_003745,gene-G4B84_008150,gene-G4B84_001968	0.387666	1	0.222222
GO:0016884	carbon-nitrogen ligase activity, with glutamine as amido-N-donor	MF	6	27	1021	5489	gene-G4B84_008470,gene-G4B84_003202,gene-G4B84_003221,gene-G4B84_010591,gene-G4B84_008205,gene-G4B84_009661	0.387666	1	0.222222
GO:0010639	negative regulation of organelle organization	BP	5	22	1021	5489	gene-G4B84_000625,gene-G4B84_008549,gene-G4B84_000345,gene-G4B84_000730,gene-G4B84_008596	0.390402	1	0.227273
GO:0016701	oxidoreductase activity, acting on single donors with incorporation of molecular oxygen	MF	5	22	1021	5489	gene-G4B84_002972,gene-G4B84_005822,gene-G4B84_009940,gene-G4B84_001313,gene-G4B84_008876	0.390402	1	0.227273
GO:0006040	amino sugar metabolic process	BP	3	12	1021	5489	gene-G4B84_010458,gene-G4B84_011653,gene-G4B84_009950	0.391764	1	0.25
GO:0006928	movement of cell or subcellular component	BP	3	12	1021	5489	gene-G4B84_007689,gene-G4B84_008706,gene-G4B84_008549	0.391764	1	0.25
GO:0007006	mitochondrial membrane organization	BP	3	12	1021	5489	gene-G4B84_002602,gene-G4B84_006697,gene-G4B84_000954	0.391764	1	0.25
GO:0009069	serine family amino acid metabolic process	BP	3	12	1021	5489	gene-G4B84_010963,gene-G4B84_009832,gene-G4B84_010587	0.391764	1	0.25
GO:0010876	lipid localization	BP	3	12	1021	5489	gene-G4B84_000670,gene-G4B84_000309,gene-G4B84_008397	0.391764	1	0.25
GO:1901071	glucosamine-containing compound metabolic process	BP	3	12	1021	5489	gene-G4B84_010458,gene-G4B84_011653,gene-G4B84_009950	0.391764	1	0.25
GO:0008017	microtubule binding	MF	3	12	1021	5489	gene-G4B84_007689,gene-G4B84_008549,gene-G4B84_008706	0.391764	1	0.25
GO:0015035	protein disulfide oxidoreductase activity	MF	3	12	1021	5489	gene-G4B84_000407,gene-G4B84_009144,gene-G4B84_009726	0.391764	1	0.25
GO:0015036	disulfide oxidoreductase activity	MF	3	12	1021	5489	gene-G4B84_000407,gene-G4B84_009144,gene-G4B84_009726	0.391764	1	0.25
GO:0016846	carbon-sulfur lyase activity	MF	3	12	1021	5489	gene-G4B84_003933,gene-G4B84_004272,gene-G4B84_012216	0.391764	1	0.25
GO:0019200	carbohydrate kinase activity	MF	3	12	1021	5489	gene-G4B84_001976,gene-G4B84_002054,gene-G4B84_006112	0.391764	1	0.25
GO:0032993	protein-DNA complex	CC	3	12	1021	5489	gene-G4B84_000390,gene-G4B84_009282,gene-G4B84_007007	0.391764	1	0.25
GO:0006753	nucleoside phosphate metabolic process	BP	18	90	1021	5489	gene-G4B84_001523,gene-G4B84_001976,gene-G4B84_002054,gene-G4B84_005333,gene-G4B84_006112,gene-G4B84_002853,gene-G4B84_000228,gene-G4B84_001001,gene-G4B84_009231,gene-G4B84_010963,gene-G4B84_004093,gene-G4B84_004094,gene-G4B84_003881,gene-G4B84_002463,gene-G4B84_011428,gene-G4B84_004714,gene-G4B84_003786,gene-G4B84_004088	0.407593	1	0.2
GO:0043168	anion binding	MF	126	664	1021	5489	gene-G4B84_000240,gene-G4B84_000722,gene-G4B84_001106,gene-G4B84_001169,gene-G4B84_001921,gene-G4B84_001922,gene-G4B84_001976,gene-G4B84_002054,gene-G4B84_003015,gene-G4B84_003392,gene-G4B84_003679,gene-G4B84_004710,gene-G4B84_005268,gene-G4B84_005285,gene-G4B84_005298,gene-G4B84_005596,gene-G4B84_006112,gene-G4B84_006229,gene-G4B84_006515,gene-G4B84_006800,gene-G4B84_007493,gene-G4B84_007651,gen…	0.413028	1	0.189759
GO:0051536	iron-sulfur cluster binding	MF	6	28	1021	5489	gene-G4B84_001561,gene-G4B84_001734,gene-G4B84_008097,gene-G4B84_010422,gene-G4B84_003150,gene-G4B84_006752	0.423886	1	0.214286
GO:0051540	metal cluster binding	MF	6	28	1021	5489	gene-G4B84_006752,gene-G4B84_001561,gene-G4B84_001734,gene-G4B84_008097,gene-G4B84_010422,gene-G4B84_003150	0.423886	1	0.214286
GO:0016020	membrane	CC	310	1651	1021	5489	gene-G4B84_000690,gene-G4B84_005471,gene-G4B84_000309,gene-G4B84_000954,gene-G4B84_004652,gene-G4B84_009950,gene-G4B84_011050,gene-G4B84_012105,gene-G4B84_008291,gene-G4B84_001501,gene-G4B84_006711,gene-G4B84_006699,gene-G4B84_000411,gene-G4B84_001007,gene-G4B84_003271,gene-G4B84_010670,gene-G4B84_002602,gene-G4B84_006697,gene-G4B84_000045,gene-G4B84_000051,gene-G4B84_000073,gene-G4B84_000099,gen…	0.426778	1	0.187765
GO:0006073	cellular glucan metabolic process	BP	5	23	1021	5489	gene-G4B84_001573,gene-G4B84_002619,gene-G4B84_007503,gene-G4B84_008019,gene-G4B84_012262	0.430575	1	0.217391
GO:0044042	glucan metabolic process	BP	5	23	1021	5489	gene-G4B84_001573,gene-G4B84_002619,gene-G4B84_007503,gene-G4B84_008019,gene-G4B84_012262	0.430575	1	0.217391
GO:0015291	secondary active transmembrane transporter activity	MF	4	18	1021	5489	gene-G4B84_001850,gene-G4B84_000411,gene-G4B84_000045,gene-G4B84_004878	0.437918	1	0.222222
GO:0016667	oxidoreductase activity, acting on a sulfur group of donors	MF	4	18	1021	5489	gene-G4B84_000407,gene-G4B84_009144,gene-G4B84_009726,gene-G4B84_004582	0.437918	1	0.222222
GO:0016829	lyase activity	MF	26	134	1021	5489	gene-G4B84_009899,gene-G4B84_011309,gene-G4B84_003150,gene-G4B84_006005,gene-G4B84_007043,gene-G4B84_009653,gene-G4B84_011294,gene-G4B84_012178,gene-G4B84_002853,gene-G4B84_002403,gene-G4B84_003055,gene-G4B84_003372,gene-G4B84_007553,gene-G4B84_010172,gene-G4B84_012050,gene-G4B84_003933,gene-G4B84_004272,gene-G4B84_012216,gene-G4B84_006186,gene-G4B84_009644,gene-G4B84_005709,gene-G4B84_007150,gen…	0.439909	1	0.19403
GO:0016773	phosphotransferase activity, alcohol group as acceptor	MF	22	113	1021	5489	gene-G4B84_009385,gene-G4B84_010091,gene-G4B84_010350,gene-G4B84_002588,gene-G4B84_001976,gene-G4B84_002054,gene-G4B84_006112,gene-G4B84_000240,gene-G4B84_005285,gene-G4B84_007493,gene-G4B84_008393,gene-G4B84_008418,gene-G4B84_010987,gene-G4B84_011489,gene-G4B84_001922,gene-G4B84_005268,gene-G4B84_005596,gene-G4B84_008574,gene-G4B84_005298,gene-G4B84_001354,gene-G4B84_003679,gene-G4B84_003786	0.443659	1	0.19469
GO:0010410	hemicellulose metabolic process	BP	3	13	1021	5489	gene-G4B84_002656,gene-G4B84_002997,gene-G4B84_007467	0.446071	1	0.230769
GO:0033045	regulation of sister chromatid segregation	BP	3	13	1021	5489	gene-G4B84_000625,gene-G4B84_002552,gene-G4B84_008549	0.446071	1	0.230769
GO:0033047	regulation of mitotic sister chromatid segregation	BP	3	13	1021	5489	gene-G4B84_000625,gene-G4B84_002552,gene-G4B84_008549	0.446071	1	0.230769
GO:0042537	benzene-containing compound metabolic process	BP	3	13	1021	5489	gene-G4B84_007820,gene-G4B84_010172,gene-G4B84_003881	0.446071	1	0.230769
GO:0045491	xylan metabolic process	BP	3	13	1021	5489	gene-G4B84_002656,gene-G4B84_002997,gene-G4B84_007467	0.446071	1	0.230769
GO:0045493	xylan catabolic process	BP	3	13	1021	5489	gene-G4B84_002656,gene-G4B84_002997,gene-G4B84_007467	0.446071	1	0.230769
GO:0098754	detoxification	BP	3	13	1021	5489	gene-G4B84_003656,gene-G4B84_010740,gene-G4B84_011728	0.446071	1	0.230769
GO:0098869	cellular oxidant detoxification	BP	3	13	1021	5489	gene-G4B84_003656,gene-G4B84_010740,gene-G4B84_011728	0.446071	1	0.230769
GO:1990748	cellular detoxification	BP	3	13	1021	5489	gene-G4B84_003656,gene-G4B84_010740,gene-G4B84_011728	0.446071	1	0.230769
GO:0010564	regulation of cell cycle process	BP	7	34	1021	5489	gene-G4B84_000625,gene-G4B84_002552,gene-G4B84_008549,gene-G4B84_000345,gene-G4B84_000730,gene-G4B84_008596,gene-G4B84_000859	0.45077	1	0.205882
GO:0016571	histone methylation	BP	2	8	1021	5489	gene-G4B84_008596,gene-G4B84_009862	0.455009	1	0.25
GO:0018904	ether metabolic process	BP	2	8	1021	5489	gene-G4B84_009144,gene-G4B84_010172	0.455009	1	0.25
GO:0019318	hexose metabolic process	BP	2	8	1021	5489	gene-G4B84_011953,gene-G4B84_005333	0.455009	1	0.25
GO:0030071	regulation of mitotic metaphase/anaphase transition	BP	2	8	1021	5489	gene-G4B84_000625,gene-G4B84_002552	0.455009	1	0.25
GO:0034605	cellular response to heat	BP	2	8	1021	5489	gene-G4B84_000625,gene-G4B84_008675	0.455009	1	0.25
GO:0044419	interspecies interaction between organisms	BP	2	8	1021	5489	gene-G4B84_005813,gene-G4B84_012276	0.455009	1	0.25
GO:0045047	protein targeting to ER	BP	2	8	1021	5489	gene-G4B84_003015,gene-G4B84_011632	0.455009	1	0.25
GO:0046834	lipid phosphorylation	BP	2	8	1021	5489	gene-G4B84_011046,gene-G4B84_011159	0.455009	1	0.25
GO:0046854	phosphatidylinositol phosphorylation	BP	2	8	1021	5489	gene-G4B84_011046,gene-G4B84_011159	0.455009	1	0.25
GO:0070972	protein localization to endoplasmic reticulum	BP	2	8	1021	5489	gene-G4B84_003015,gene-G4B84_011632	0.455009	1	0.25
GO:0072599	establishment of protein localization to endoplasmic reticulum	BP	2	8	1021	5489	gene-G4B84_003015,gene-G4B84_011632	0.455009	1	0.25
GO:1902099	regulation of metaphase/anaphase transition of cell cycle	BP	2	8	1021	5489	gene-G4B84_000625,gene-G4B84_002552	0.455009	1	0.25
GO:0004764	shikimate 3-dehydrogenase (NADP+) activity	MF	2	8	1021	5489	gene-G4B84_009899,gene-G4B84_011309	0.455009	1	0.25
GO:0015923	mannosidase activity	MF	2	8	1021	5489	gene-G4B84_003206,gene-G4B84_009744	0.455009	1	0.25
GO:0016780	phosphotransferase activity, for other substituted phosphate groups	MF	2	8	1021	5489	gene-G4B84_008247,gene-G4B84_003688	0.455009	1	0.25
GO:0016814	hydrolase activity, acting on carbon-nitrogen (but not peptide) bonds, in cyclic amidines	MF	2	8	1021	5489	gene-G4B84_003207,gene-G4B84_004428	0.455009	1	0.25
GO:0016881	acid-amino acid ligase activity	MF	2	8	1021	5489	gene-G4B84_008060,gene-G4B84_005171	0.455009	1	0.25
GO:0000022	mitotic spindle elongation	BP	1	3	1021	5489	gene-G4B84_008549	0.460731	1	0.333333
GO:0000083	regulation of transcription involved in G1/S transition of mitotic cell cycle	BP	1	3	1021	5489	gene-G4B84_011149	0.460731	1	0.333333
GO:0000132	establishment of mitotic spindle orientation	BP	1	3	1021	5489	gene-G4B84_008549	0.460731	1	0.333333
GO:0001897	cytolysis by symbiont of host cells	BP	1	3	1021	5489	gene-G4B84_012276	0.460731	1	0.333333
GO:0001906	cell killing	BP	1	3	1021	5489	gene-G4B84_012276	0.460731	1	0.333333
GO:0001907	killing by symbiont of host cells	BP	1	3	1021	5489	gene-G4B84_012276	0.460731	1	0.333333
GO:0006145	purine nucleobase catabolic process	BP	1	3	1021	5489	gene-G4B84_004428	0.460731	1	0.333333
GO:0006266	DNA ligation	BP	1	3	1021	5489	gene-G4B84_010954	0.460731	1	0.333333
GO:0006474	N-terminal protein amino acid acetylation	BP	1	3	1021	5489	gene-G4B84_003698	0.460731	1	0.333333
GO:0006521	regulation of cellular amino acid metabolic process	BP	1	3	1021	5489	gene-G4B84_000755	0.460731	1	0.333333
GO:0006562	proline catabolic process	BP	1	3	1021	5489	gene-G4B84_008363	0.460731	1	0.333333
GO:0006635	fatty acid beta-oxidation	BP	1	3	1021	5489	gene-G4B84_012279	0.460731	1	0.333333
GO:0006673	inositol phosphoceramide metabolic process	BP	1	3	1021	5489	gene-G4B84_001007	0.460731	1	0.333333
GO:0006801	superoxide metabolic process	BP	1	3	1021	5489	gene-G4B84_003204	0.460731	1	0.333333
GO:0008614	pyridoxine metabolic process	BP	1	3	1021	5489	gene-G4B84_011944	0.460731	1	0.333333
GO:0008615	pyridoxine biosynthetic process	BP	1	3	1021	5489	gene-G4B84_011944	0.460731	1	0.333333
GO:0009225	nucleotide-sugar metabolic process	BP	1	3	1021	5489	gene-G4B84_004812	0.460731	1	0.333333
GO:0009396	folic acid-containing compound biosynthetic process	BP	1	3	1021	5489	gene-G4B84_000127	0.460731	1	0.333333
GO:0009405	pathogenesis	BP	1	3	1021	5489	gene-G4B84_005813	0.460731	1	0.333333
GO:0009698	phenylpropanoid metabolic process	BP	1	3	1021	5489	gene-G4B84_010172	0.460731	1	0.333333
GO:0009719	response to endogenous stimulus	BP	1	3	1021	5489	gene-G4B84_000755	0.460731	1	0.333333
GO:0009803	cinnamic acid metabolic process	BP	1	3	1021	5489	gene-G4B84_010172	0.460731	1	0.333333
GO:0010970	transport along microtubule	BP	1	3	1021	5489	gene-G4B84_008549	0.460731	1	0.333333
GO:0015718	monocarboxylic acid transport	BP	1	3	1021	5489	gene-G4B84_000670	0.460731	1	0.333333
GO:0016126	sterol biosynthetic process	BP	1	3	1021	5489	gene-G4B84_006699	0.460731	1	0.333333
GO:0016559	peroxisome fission	BP	1	3	1021	5489	gene-G4B84_002946	0.460731	1	0.333333
GO:0017148	negative regulation of translation	BP	1	3	1021	5489	gene-G4B84_010956	0.460731	1	0.333333
GO:0018105	peptidyl-serine phosphorylation	BP	1	3	1021	5489	gene-G4B84_005298	0.460731	1	0.333333
GO:0018108	peptidyl-tyrosine phosphorylation	BP	1	3	1021	5489	gene-G4B84_005298	0.460731	1	0.333333
GO:0018212	peptidyl-tyrosine modification	BP	1	3	1021	5489	gene-G4B84_005298	0.460731	1	0.333333
GO:0019395	fatty acid oxidation	BP	1	3	1021	5489	gene-G4B84_012279	0.460731	1	0.333333
GO:0019627	urea metabolic process	BP	1	3	1021	5489	gene-G4B84_000755	0.460731	1	0.333333
GO:0019835	cytolysis	BP	1	3	1021	5489	gene-G4B84_012276	0.460731	1	0.333333
GO:0019836	hemolysis by symbiont of host erythrocytes	BP	1	3	1021	5489	gene-G4B84_012276	0.460731	1	0.333333
GO:0019932	second-messenger-mediated signaling	BP	1	3	1021	5489	gene-G4B84_005511	0.460731	1	0.333333
GO:0030174	regulation of DNA-dependent DNA replication initiation	BP	1	3	1021	5489	gene-G4B84_009282	0.460731	1	0.333333
GO:0031333	negative regulation of protein complex assembly	BP	1	3	1021	5489	gene-G4B84_008549	0.460731	1	0.333333
GO:0031640	killing of cells of other organism	BP	1	3	1021	5489	gene-G4B84_012276	0.460731	1	0.333333
GO:0034204	lipid translocation	BP	1	3	1021	5489	gene-G4B84_008397	0.460731	1	0.333333
GO:0034249	negative regulation of cellular amide metabolic process	BP	1	3	1021	5489	gene-G4B84_010956	0.460731	1	0.333333
GO:0034440	lipid oxidation	BP	1	3	1021	5489	gene-G4B84_012279	0.460731	1	0.333333
GO:0035821	modification of morphology or physiology of other organism	BP	1	3	1021	5489	gene-G4B84_012276	0.460731	1	0.333333
GO:0036289	peptidyl-serine autophosphorylation	BP	1	3	1021	5489	gene-G4B84_005298	0.460731	1	0.333333
GO:0038083	peptidyl-tyrosine autophosphorylation	BP	1	3	1021	5489	gene-G4B84_005298	0.460731	1	0.333333
GO:0040001	establishment of mitotic spindle localization	BP	1	3	1021	5489	gene-G4B84_008549	0.460731	1	0.333333
GO:0042149	cellular response to glucose starvation	BP	1	3	1021	5489	gene-G4B84_002552	0.460731	1	0.333333
GO:0042256	mature ribosome assembly	BP	1	3	1021	5489	gene-G4B84_010956	0.460731	1	0.333333
GO:0044003	modification by symbiont of host morphology or physiology	BP	1	3	1021	5489	gene-G4B84_012276	0.460731	1	0.333333
GO:0044004	disruption by symbiont of host cell	BP	1	3	1021	5489	gene-G4B84_012276	0.460731	1	0.333333
GO:0044107	cellular alcohol metabolic process	BP	1	3	1021	5489	gene-G4B84_006699	0.460731	1	0.333333
GO:0044179	hemolysis in other organism	BP	1	3	1021	5489	gene-G4B84_012276	0.460731	1	0.333333
GO:0044364	disruption of cells of other organism	BP	1	3	1021	5489	gene-G4B84_012276	0.460731	1	0.333333
GO:0045332	phospholipid translocation	BP	1	3	1021	5489	gene-G4B84_008397	0.460731	1	0.333333
GO:0046039	GTP metabolic process	BP	1	3	1021	5489	gene-G4B84_004088	0.460731	1	0.333333
GO:0046113	nucleobase catabolic process	BP	1	3	1021	5489	gene-G4B84_004428	0.460731	1	0.333333
GO:0051231	spindle elongation	BP	1	3	1021	5489	gene-G4B84_008549	0.460731	1	0.333333
GO:0051293	establishment of spindle localization	BP	1	3	1021	5489	gene-G4B84_008549	0.460731	1	0.333333
GO:0051294	establishment of spindle orientation	BP	1	3	1021	5489	gene-G4B84_008549	0.460731	1	0.333333
GO:0051653	spindle localization	BP	1	3	1021	5489	gene-G4B84_008549	0.460731	1	0.333333
GO:0051701	interaction with host	BP	1	3	1021	5489	gene-G4B84_012276	0.460731	1	0.333333
GO:0051715	cytolysis in other organism	BP	1	3	1021	5489	gene-G4B84_012276	0.460731	1	0.333333
GO:0051801	cytolysis in other organism involved in symbiotic interaction	BP	1	3	1021	5489	gene-G4B84_012276	0.460731	1	0.333333
GO:0051817	modification of morphology or physiology of other organism involved in symbiotic interaction	BP	1	3	1021	5489	gene-G4B84_012276	0.460731	1	0.333333
GO:0051818	disruption of cells of other organism involved in symbiotic interaction	BP	1	3	1021	5489	gene-G4B84_012276	0.460731	1	0.333333
GO:0051883	killing of cells in other organism involved in symbiotic interaction	BP	1	3	1021	5489	gene-G4B84_012276	0.460731	1	0.333333
GO:0052331	hemolysis in other organism involved in symbiotic interaction	BP	1	3	1021	5489	gene-G4B84_012276	0.460731	1	0.333333
GO:0055067	monovalent inorganic cation homeostasis	BP	1	3	1021	5489	gene-G4B84_004878	0.460731	1	0.333333
GO:0070911	global genome nucleotide-excision repair	BP	1	3	1021	5489	gene-G4B84_008596	0.460731	1	0.333333
GO:0071495	cellular response to endogenous stimulus	BP	1	3	1021	5489	gene-G4B84_000755	0.460731	1	0.333333
GO:0072384	organelle transport along microtubule	BP	1	3	1021	5489	gene-G4B84_008549	0.460731	1	0.333333
GO:0097035	regulation of membrane lipid distribution	BP	1	3	1021	5489	gene-G4B84_008397	0.460731	1	0.333333
GO:1901985	positive regulation of protein acetylation	BP	1	3	1021	5489	gene-G4B84_003698	0.460731	1	0.333333
GO:0003713	transcription coactivator activity	MF	1	3	1021	5489	gene-G4B84_000755	0.460731	1	0.333333
GO:0003909	DNA ligase activity	MF	1	3	1021	5489	gene-G4B84_010954	0.460731	1	0.333333
GO:0003910	DNA ligase (ATP) activity	MF	1	3	1021	5489	gene-G4B84_010954	0.460731	1	0.333333
GO:0004012	phospholipid-translocating ATPase activity	MF	1	3	1021	5489	gene-G4B84_008397	0.460731	1	0.333333
GO:0004069	L-aspartate:2-oxoglutarate aminotransferase activity	MF	1	3	1021	5489	gene-G4B84_008433	0.460731	1	0.333333
GO:0004312	fatty acid synthase activity	MF	1	3	1021	5489	gene-G4B84_012150	0.460731	1	0.333333
GO:0004318	enoyl-[acyl-carrier-protein] reductase (NADH) activity	MF	1	3	1021	5489	gene-G4B84_012150	0.460731	1	0.333333
GO:0004523	RNA-DNA hybrid ribonuclease activity	MF	1	3	1021	5489	gene-G4B84_006771	0.460731	1	0.333333
GO:0004567	beta-mannosidase activity	MF	1	3	1021	5489	gene-G4B84_009744	0.460731	1	0.333333
GO:0004571	mannosyl-oligosaccharide 1,2-alpha-mannosidase activity	MF	1	3	1021	5489	gene-G4B84_003206	0.460731	1	0.333333
GO:0004713	protein tyrosine kinase activity	MF	1	3	1021	5489	gene-G4B84_005298	0.460731	1	0.333333
GO:0004733	pyridoxamine-phosphate oxidase activity	MF	1	3	1021	5489	gene-G4B84_011944	0.460731	1	0.333333
GO:0005247	voltage-gated chloride channel activity	MF	1	3	1021	5489	gene-G4B84_011836	0.460731	1	0.333333
GO:0005254	chloride channel activity	MF	1	3	1021	5489	gene-G4B84_011836	0.460731	1	0.333333
GO:0005315	inorganic phosphate transmembrane transporter activity	MF	1	3	1021	5489	gene-G4B84_001850	0.460731	1	0.333333
GO:0008138	protein tyrosine/serine/threonine phosphatase activity	MF	1	3	1021	5489	gene-G4B84_000359	0.460731	1	0.333333
GO:0008793	aromatic-amino-acid:2-oxoglutarate aminotransferase activity	MF	1	3	1021	5489	gene-G4B84_008433	0.460731	1	0.333333
GO:0015295	solute:proton symporter activity	MF	1	3	1021	5489	gene-G4B84_000411	0.460731	1	0.333333
GO:0015662	ATPase activity, coupled to transmembrane movement of ions, phosphorylative mechanism	MF	1	3	1021	5489	gene-G4B84_009231	0.460731	1	0.333333
GO:0015924	mannosyl-oligosaccharide mannosidase activity	MF	1	3	1021	5489	gene-G4B84_003206	0.460731	1	0.333333
GO:0016289	CoA hydrolase activity	MF	1	3	1021	5489	gene-G4B84_001001	0.460731	1	0.333333
GO:0016426	tRNA (adenine) methyltransferase activity	MF	1	3	1021	5489	gene-G4B84_009065	0.460731	1	0.333333
GO:0016429	tRNA (adenine-N1-)-methyltransferase activity	MF	1	3	1021	5489	gene-G4B84_009065	0.460731	1	0.333333
GO:0016985	mannan endo-1,4-beta-mannosidase activity	MF	1	3	1021	5489	gene-G4B84_009744	0.460731	1	0.333333
GO:0019238	cyclohydrolase activity	MF	1	3	1021	5489	gene-G4B84_003207	0.460731	1	0.333333
GO:0019825	oxygen binding	MF	1	3	1021	5489	gene-G4B84_006034	0.460731	1	0.333333
GO:0043813	phosphatidylinositol-3,5-bisphosphate 5-phosphatase activity	MF	1	3	1021	5489	gene-G4B84_005081	0.460731	1	0.333333
GO:0047617	acyl-CoA hydrolase activity	MF	1	3	1021	5489	gene-G4B84_001001	0.460731	1	0.333333
GO:0047911	galacturan 1,4-alpha-galacturonidase activity	MF	1	3	1021	5489	gene-G4B84_004551	0.460731	1	0.333333
GO:0060089	molecular transducer activity	MF	1	3	1021	5489	gene-G4B84_010091	0.460731	1	0.333333
GO:0061630	ubiquitin protein ligase activity	MF	1	3	1021	5489	gene-G4B84_004923	0.460731	1	0.333333
GO:0061659	ubiquitin-like protein ligase activity	MF	1	3	1021	5489	gene-G4B84_004923	0.460731	1	0.333333
GO:0070546	L-phenylalanine aminotransferase activity	MF	1	3	1021	5489	gene-G4B84_008433	0.460731	1	0.333333
GO:0080130	L-phenylalanine:2-oxoglutarate aminotransferase activity	MF	1	3	1021	5489	gene-G4B84_008433	0.460731	1	0.333333
GO:0106018	phosphatidylinositol-3,5-bisphosphate phosphatase activity	MF	1	3	1021	5489	gene-G4B84_005081	0.460731	1	0.333333
GO:0000407	phagophore assembly site	CC	1	3	1021	5489	gene-G4B84_006711	0.460731	1	0.333333
GO:0005802	trans-Golgi network	CC	1	3	1021	5489	gene-G4B84_001007	0.460731	1	0.333333
GO:0005835	fatty acid synthase complex	CC	1	3	1021	5489	gene-G4B84_012150	0.460731	1	0.333333
GO:0016272	prefoldin complex	CC	1	3	1021	5489	gene-G4B84_010705	0.460731	1	0.333333
GO:0030118	clathrin coat	CC	1	3	1021	5489	gene-G4B84_000859	0.460731	1	0.333333
GO:0030136	clathrin-coated vesicle	CC	1	3	1021	5489	gene-G4B84_000859	0.460731	1	0.333333
GO:0030428	cell septum	CC	1	3	1021	5489	gene-G4B84_006921	0.460731	1	0.333333
GO:0031515	tRNA (m1A) methyltransferase complex	CC	1	3	1021	5489	gene-G4B84_009065	0.460731	1	0.333333
GO:0034455	t-UTP complex	CC	1	3	1021	5489	gene-G4B84_000720	0.460731	1	0.333333
GO:0043527	tRNA methyltransferase complex	CC	1	3	1021	5489	gene-G4B84_009065	0.460731	1	0.333333
GO:0044421	extracellular region part	CC	1	3	1021	5489	gene-G4B84_008663	0.460731	1	0.333333
GO:0097344	Rix1 complex	CC	1	3	1021	5489	gene-G4B84_009282	0.460731	1	0.333333
GO:0019842	vitamin binding	MF	19	98	1021	5489	gene-G4B84_000149,gene-G4B84_000671,gene-G4B84_001655,gene-G4B84_001713,gene-G4B84_003055,gene-G4B84_003372,gene-G4B84_003770,gene-G4B84_006407,gene-G4B84_006914,gene-G4B84_007641,gene-G4B84_008052,gene-G4B84_008433,gene-G4B84_011585,gene-G4B84_012050,gene-G4B84_002403,gene-G4B84_004659,gene-G4B84_006937,gene-G4B84_007517,gene-G4B84_009652	0.461192	1	0.193878
GO:0015711	organic anion transport	BP	9	45	1021	5489	gene-G4B84_006917,gene-G4B84_010294,gene-G4B84_007857,gene-G4B84_007756,gene-G4B84_000349,gene-G4B84_007738,gene-G4B84_000670,gene-G4B84_008397,gene-G4B84_001739	0.464207	1	0.2
GO:0008324	cation transmembrane transporter activity	MF	12	61	1021	5489	gene-G4B84_004710,gene-G4B84_006425,gene-G4B84_000411,gene-G4B84_008497,gene-G4B84_002027,gene-G4B84_003919,gene-G4B84_009231,gene-G4B84_004714,gene-G4B84_000045,gene-G4B84_004878,gene-G4B84_000189,gene-G4B84_003478	0.466192	1	0.196721
GO:0004672	protein kinase activity	MF	15	77	1021	5489	gene-G4B84_009385,gene-G4B84_010091,gene-G4B84_010350,gene-G4B84_001922,gene-G4B84_005268,gene-G4B84_005596,gene-G4B84_008574,gene-G4B84_005298,gene-G4B84_000240,gene-G4B84_005285,gene-G4B84_007493,gene-G4B84_008393,gene-G4B84_008418,gene-G4B84_010987,gene-G4B84_011489	0.467157	1	0.194805
GO:0051129	negative regulation of cellular component organization	BP	5	24	1021	5489	gene-G4B84_000625,gene-G4B84_008549,gene-G4B84_000345,gene-G4B84_000730,gene-G4B84_008596	0.470166	1	0.208333
GO:0090150	establishment of protein localization to membrane	BP	5	24	1021	5489	gene-G4B84_003015,gene-G4B84_011632,gene-G4B84_000954,gene-G4B84_003392,gene-G4B84_008208	0.470166	1	0.208333
GO:0140110	transcription regulator activity	MF	31	163	1021	5489	gene-G4B84_000755,gene-G4B84_000966,gene-G4B84_001167,gene-G4B84_001598,gene-G4B84_001735,gene-G4B84_001743,gene-G4B84_002267,gene-G4B84_002627,gene-G4B84_003654,gene-G4B84_004427,gene-G4B84_004626,gene-G4B84_004955,gene-G4B84_005753,gene-G4B84_005804,gene-G4B84_005816,gene-G4B84_006027,gene-G4B84_006544,gene-G4B84_008471,gene-G4B84_008780,gene-G4B84_008860,gene-G4B84_009009,gene-G4B84_009683,gen…	0.477247	1	0.190184
GO:0010383	cell wall polysaccharide metabolic process	BP	4	19	1021	5489	gene-G4B84_009950,gene-G4B84_002656,gene-G4B84_002997,gene-G4B84_007467	0.482575	1	0.210526
GO:0033865	nucleoside bisphosphate metabolic process	BP	4	19	1021	5489	gene-G4B84_001523,gene-G4B84_001001,gene-G4B84_002463,gene-G4B84_011428	0.482575	1	0.210526
GO:0033875	ribonucleoside bisphosphate metabolic process	BP	4	19	1021	5489	gene-G4B84_001523,gene-G4B84_001001,gene-G4B84_002463,gene-G4B84_011428	0.482575	1	0.210526
GO:0034032	purine nucleoside bisphosphate metabolic process	BP	4	19	1021	5489	gene-G4B84_001523,gene-G4B84_001001,gene-G4B84_002463,gene-G4B84_011428	0.482575	1	0.210526
GO:0005777	peroxisome	CC	4	19	1021	5489	gene-G4B84_003271,gene-G4B84_002946,gene-G4B84_000670,gene-G4B84_012279	0.482575	1	0.210526
GO:0042579	microbody	CC	4	19	1021	5489	gene-G4B84_000670,gene-G4B84_012279,gene-G4B84_003271,gene-G4B84_002946	0.482575	1	0.210526
GO:0009152	purine ribonucleotide biosynthetic process	BP	7	35	1021	5489	gene-G4B84_001976,gene-G4B84_002054,gene-G4B84_005333,gene-G4B84_006112,gene-G4B84_002853,gene-G4B84_009231,gene-G4B84_004714	0.483443	1	0.2
GO:0006066	alcohol metabolic process	BP	3	14	1021	5489	gene-G4B84_002058,gene-G4B84_006699,gene-G4B84_008860	0.498322	1	0.214286
GO:0006081	cellular aldehyde metabolic process	BP	3	14	1021	5489	gene-G4B84_005333,gene-G4B84_001354,gene-G4B84_011944	0.498322	1	0.214286
GO:0033260	nuclear DNA replication	BP	3	14	1021	5489	gene-G4B84_009282,gene-G4B84_000390,gene-G4B84_007007	0.498322	1	0.214286
GO:0051983	regulation of chromosome segregation	BP	3	14	1021	5489	gene-G4B84_000625,gene-G4B84_002552,gene-G4B84_008549	0.498322	1	0.214286
GO:0071310	cellular response to organic substance	BP	3	14	1021	5489	gene-G4B84_000755,gene-G4B84_008257,gene-G4B84_008178	0.498322	1	0.214286
GO:0016651	oxidoreductase activity, acting on NAD(P)H	MF	3	14	1021	5489	gene-G4B84_004652,gene-G4B84_011050,gene-G4B84_004582	0.498322	1	0.214286
GO:0045786	negative regulation of cell cycle	BP	5	25	1021	5489	gene-G4B84_000625,gene-G4B84_008596,gene-G4B84_000345,gene-G4B84_000730,gene-G4B84_000859	0.508842	1	0.2
GO:0006811	ion transport	BP	25	133	1021	5489	gene-G4B84_006917,gene-G4B84_010294,gene-G4B84_007857,gene-G4B84_000189,gene-G4B84_007079,gene-G4B84_001850,gene-G4B84_011836,gene-G4B84_006425,gene-G4B84_007756,gene-G4B84_010644,gene-G4B84_000349,gene-G4B84_007738,gene-G4B84_000670,gene-G4B84_000045,gene-G4B84_009231,gene-G4B84_004714,gene-G4B84_008497,gene-G4B84_008397,gene-G4B84_001739,gene-G4B84_002027,gene-G4B84_003919,gene-G4B84_003478,gen…	0.512504	1	0.18797
GO:0042221	response to chemical	BP	12	63	1021	5489	gene-G4B84_000755,gene-G4B84_003015,gene-G4B84_003673,gene-G4B84_008257,gene-G4B84_000137,gene-G4B84_008381,gene-G4B84_008675,gene-G4B84_011150,gene-G4B84_008178,gene-G4B84_003656,gene-G4B84_010740,gene-G4B84_011728	0.514937	1	0.190476
GO:0009260	ribonucleotide biosynthetic process	BP	7	36	1021	5489	gene-G4B84_001976,gene-G4B84_002054,gene-G4B84_005333,gene-G4B84_006112,gene-G4B84_002853,gene-G4B84_009231,gene-G4B84_004714	0.515544	1	0.194444
GO:0015849	organic acid transport	BP	7	36	1021	5489	gene-G4B84_006917,gene-G4B84_010294,gene-G4B84_007857,gene-G4B84_007756,gene-G4B84_007738,gene-G4B84_000670,gene-G4B84_001739	0.515544	1	0.194444
GO:0046942	carboxylic acid transport	BP	7	36	1021	5489	gene-G4B84_006917,gene-G4B84_010294,gene-G4B84_007857,gene-G4B84_007756,gene-G4B84_007738,gene-G4B84_000670,gene-G4B84_001739	0.515544	1	0.194444
GO:0044425	membrane part	CC	235	1264	1021	5489	gene-G4B84_000309,gene-G4B84_000954,gene-G4B84_004652,gene-G4B84_009950,gene-G4B84_011050,gene-G4B84_011788,gene-G4B84_000045,gene-G4B84_000051,gene-G4B84_000073,gene-G4B84_000099,gene-G4B84_000111,gene-G4B84_000284,gene-G4B84_000349,gene-G4B84_000359,gene-G4B84_000411,gene-G4B84_000488,gene-G4B84_000602,gene-G4B84_000670,gene-G4B84_000690,gene-G4B84_000864,gene-G4B84_000881,gene-G4B84_000901,gen…	0.51834	1	0.185918
GO:0006637	acyl-CoA metabolic process	BP	2	9	1021	5489	gene-G4B84_001523,gene-G4B84_001001	0.520605	1	0.222222
GO:0006665	sphingolipid metabolic process	BP	2	9	1021	5489	gene-G4B84_004996,gene-G4B84_001007	0.520605	1	0.222222
GO:0006997	nucleus organization	BP	2	9	1021	5489	gene-G4B84_003015,gene-G4B84_000625	0.520605	1	0.222222
GO:0007091	metaphase/anaphase transition of mitotic cell cycle	BP	2	9	1021	5489	gene-G4B84_000625,gene-G4B84_002552	0.520605	1	0.222222
GO:0009266	response to temperature stimulus	BP	2	9	1021	5489	gene-G4B84_008675,gene-G4B84_000625	0.520605	1	0.222222
GO:0009408	response to heat	BP	2	9	1021	5489	gene-G4B84_008675,gene-G4B84_000625	0.520605	1	0.222222
GO:0009991	response to extracellular stimulus	BP	2	9	1021	5489	gene-G4B84_000755,gene-G4B84_002552	0.520605	1	0.222222
GO:0010965	regulation of mitotic sister chromatid separation	BP	2	9	1021	5489	gene-G4B84_000625,gene-G4B84_002552	0.520605	1	0.222222
GO:0015936	coenzyme A metabolic process	BP	2	9	1021	5489	gene-G4B84_002463,gene-G4B84_011428	0.520605	1	0.222222
GO:0018022	peptidyl-lysine methylation	BP	2	9	1021	5489	gene-G4B84_008596,gene-G4B84_009862	0.520605	1	0.222222
GO:0030433	ubiquitin-dependent ERAD pathway	BP	2	9	1021	5489	gene-G4B84_003015,gene-G4B84_003673	0.520605	1	0.222222
GO:0031667	response to nutrient levels	BP	2	9	1021	5489	gene-G4B84_000755,gene-G4B84_002552	0.520605	1	0.222222
GO:0031668	cellular response to extracellular stimulus	BP	2	9	1021	5489	gene-G4B84_000755,gene-G4B84_002552	0.520605	1	0.222222
GO:0031669	cellular response to nutrient levels	BP	2	9	1021	5489	gene-G4B84_000755,gene-G4B84_002552	0.520605	1	0.222222
GO:0034250	positive regulation of cellular amide metabolic process	BP	2	9	1021	5489	gene-G4B84_010044,gene-G4B84_000755	0.520605	1	0.222222
GO:0035383	thioester metabolic process	BP	2	9	1021	5489	gene-G4B84_001523,gene-G4B84_001001	0.520605	1	0.222222
GO:0044784	metaphase/anaphase transition of cell cycle	BP	2	9	1021	5489	gene-G4B84_000625,gene-G4B84_002552	0.520605	1	0.222222
GO:0051306	mitotic sister chromatid separation	BP	2	9	1021	5489	gene-G4B84_000625,gene-G4B84_002552	0.520605	1	0.222222
GO:0071496	cellular response to external stimulus	BP	2	9	1021	5489	gene-G4B84_000755,gene-G4B84_002552	0.520605	1	0.222222
GO:1901700	response to oxygen-containing compound	BP	2	9	1021	5489	gene-G4B84_008381,gene-G4B84_008675	0.520605	1	0.222222
GO:1901701	cellular response to oxygen-containing compound	BP	2	9	1021	5489	gene-G4B84_008381,gene-G4B84_008675	0.520605	1	0.222222
GO:1905818	regulation of chromosome separation	BP	2	9	1021	5489	gene-G4B84_000625,gene-G4B84_002552	0.520605	1	0.222222
GO:0004003	ATP-dependent DNA helicase activity	MF	2	9	1021	5489	gene-G4B84_000722,gene-G4B84_007635	0.520605	1	0.222222
GO:0019783	ubiquitin-like protein-specific protease activity	MF	2	9	1021	5489	gene-G4B84_012104,gene-G4B84_003971	0.520605	1	0.222222
GO:0030151	molybdenum ion binding	MF	2	9	1021	5489	gene-G4B84_001655,gene-G4B84_011585	0.520605	1	0.222222
GO:0036459	thiol-dependent ubiquitinyl hydrolase activity	MF	2	9	1021	5489	gene-G4B84_012104,gene-G4B84_003971	0.520605	1	0.222222
GO:0101005	ubiquitinyl hydrolase activity	MF	2	9	1021	5489	gene-G4B84_012104,gene-G4B84_003971	0.520605	1	0.222222
GO:0031305	integral component of mitochondrial inner membrane	CC	2	9	1021	5489	gene-G4B84_002602,gene-G4B84_006697	0.520605	1	0.222222
GO:0016879	ligase activity, forming carbon-nitrogen bonds	MF	9	47	1021	5489	gene-G4B84_008470,gene-G4B84_007651,gene-G4B84_008060,gene-G4B84_005171,gene-G4B84_003202,gene-G4B84_003221,gene-G4B84_010591,gene-G4B84_008205,gene-G4B84_009661	0.5207	1	0.191489
GO:0009628	response to abiotic stimulus	BP	4	20	1021	5489	gene-G4B84_010091,gene-G4B84_008675,gene-G4B84_000722,gene-G4B84_000625	0.525746	1	0.2
GO:0051082	unfolded protein binding	MF	4	20	1021	5489	gene-G4B84_000271,gene-G4B84_003015,gene-G4B84_006800,gene-G4B84_009950	0.525746	1	0.2
GO:0022890	inorganic cation transmembrane transporter activity	MF	10	53	1021	5489	gene-G4B84_004710,gene-G4B84_006425,gene-G4B84_000411,gene-G4B84_008497,gene-G4B84_002027,gene-G4B84_003919,gene-G4B84_009231,gene-G4B84_004714,gene-G4B84_000045,gene-G4B84_004878	0.536024	1	0.188679
GO:0016310	phosphorylation	BP	32	173	1021	5489	gene-G4B84_001976,gene-G4B84_002054,gene-G4B84_005333,gene-G4B84_006112,gene-G4B84_002853,gene-G4B84_000228,gene-G4B84_000240,gene-G4B84_001922,gene-G4B84_005268,gene-G4B84_005285,gene-G4B84_005596,gene-G4B84_007493,gene-G4B84_008393,gene-G4B84_008418,gene-G4B84_008574,gene-G4B84_010987,gene-G4B84_011489,gene-G4B84_009385,gene-G4B84_010091,gene-G4B84_010350,gene-G4B84_000730,gene-G4B84_005298,gen…	0.546007	1	0.184971
GO:0009308	amine metabolic process	BP	5	26	1021	5489	gene-G4B84_003881,gene-G4B84_007820,gene-G4B84_010044,gene-G4B84_000755,gene-G4B84_002199	0.546324	1	0.192308
GO:0010033	response to organic substance	BP	5	26	1021	5489	gene-G4B84_000755,gene-G4B84_003015,gene-G4B84_003673,gene-G4B84_008257,gene-G4B84_008178	0.546324	1	0.192308
GO:0046488	phosphatidylinositol metabolic process	BP	5	26	1021	5489	gene-G4B84_001176,gene-G4B84_005081,gene-G4B84_011046,gene-G4B84_011159,gene-G4B84_007087	0.546324	1	0.192308
GO:0072657	protein localization to membrane	BP	5	26	1021	5489	gene-G4B84_003015,gene-G4B84_011632,gene-G4B84_000954,gene-G4B84_003392,gene-G4B84_008208	0.546324	1	0.192308
GO:0046390	ribose phosphate biosynthetic process	BP	7	37	1021	5489	gene-G4B84_001976,gene-G4B84_002054,gene-G4B84_005333,gene-G4B84_006112,gene-G4B84_002853,gene-G4B84_009231,gene-G4B84_004714	0.546902	1	0.189189
GO:0007034	vacuolar transport	BP	3	15	1021	5489	gene-G4B84_001007,gene-G4B84_006293,gene-G4B84_004878	0.547946	1	0.2
GO:0044786	cell cycle DNA replication	BP	3	15	1021	5489	gene-G4B84_009282,gene-G4B84_007007,gene-G4B84_000390	0.547946	1	0.2
GO:0051123	RNA polymerase II preinitiation complex assembly	BP	3	15	1021	5489	gene-G4B84_000755,gene-G4B84_005224,gene-G4B84_006230	0.547946	1	0.2
GO:0000123	histone acetyltransferase complex	CC	3	15	1021	5489	gene-G4B84_005224,gene-G4B84_004903,gene-G4B84_004919	0.547946	1	0.2
GO:0071949	FAD binding	MF	9	48	1021	5489	gene-G4B84_004683,gene-G4B84_005142,gene-G4B84_005709,gene-G4B84_006034,gene-G4B84_006130,gene-G4B84_003095,gene-G4B84_007273,gene-G4B84_007520,gene-G4B84_009331	0.548208	1	0.1875
GO:0000082	G1/S transition of mitotic cell cycle	BP	1	4	1021	5489	gene-G4B84_011149	0.561094	1	0.25
GO:0000726	non-recombinational repair	BP	1	4	1021	5489	gene-G4B84_007635	0.561094	1	0.25
GO:0005991	trehalose metabolic process	BP	1	4	1021	5489	gene-G4B84_000188	0.561094	1	0.25
GO:0006006	glucose metabolic process	BP	1	4	1021	5489	gene-G4B84_005333	0.561094	1	0.25
GO:0006023	aminoglycan biosynthetic process	BP	1	4	1021	5489	gene-G4B84_009950	0.561094	1	0.25
GO:0006031	chitin biosynthetic process	BP	1	4	1021	5489	gene-G4B84_009950	0.561094	1	0.25
GO:0006072	glycerol-3-phosphate metabolic process	BP	1	4	1021	5489	gene-G4B84_002588	0.561094	1	0.25
GO:0006094	gluconeogenesis	BP	1	4	1021	5489	gene-G4B84_005333	0.561094	1	0.25
GO:0006119	oxidative phosphorylation	BP	1	4	1021	5489	gene-G4B84_000228	0.561094	1	0.25
GO:0006303	double-strand break repair via nonhomologous end joining	BP	1	4	1021	5489	gene-G4B84_007635	0.561094	1	0.25
GO:0006528	asparagine metabolic process	BP	1	4	1021	5489	gene-G4B84_008470	0.561094	1	0.25
GO:0006529	asparagine biosynthetic process	BP	1	4	1021	5489	gene-G4B84_008470	0.561094	1	0.25
GO:0006537	glutamate biosynthetic process	BP	1	4	1021	5489	gene-G4B84_006752	0.561094	1	0.25
GO:0006817	phosphate ion transport	BP	1	4	1021	5489	gene-G4B84_001850	0.561094	1	0.25
GO:0007008	outer mitochondrial membrane organization	BP	1	4	1021	5489	gene-G4B84_000954	0.561094	1	0.25
GO:0007029	endoplasmic reticulum organization	BP	1	4	1021	5489	gene-G4B84_003392	0.561094	1	0.25
GO:0007094	mitotic spindle assembly checkpoint	BP	1	4	1021	5489	gene-G4B84_000625	0.561094	1	0.25
GO:0007097	nuclear migration	BP	1	4	1021	5489	gene-G4B84_008549	0.561094	1	0.25
GO:0009062	fatty acid catabolic process	BP	1	4	1021	5489	gene-G4B84_012279	0.561094	1	0.25
GO:0016560	protein import into peroxisome matrix, docking	BP	1	4	1021	5489	gene-G4B84_003271	0.561094	1	0.25
GO:0016973	poly(A)+ mRNA export from nucleus	BP	1	4	1021	5489	gene-G4B84_000625	0.561094	1	0.25
GO:0016998	cell wall macromolecule catabolic process	BP	1	4	1021	5489	gene-G4B84_002656	0.561094	1	0.25
GO:0019319	hexose biosynthetic process	BP	1	4	1021	5489	gene-G4B84_005333	0.561094	1	0.25
GO:0030148	sphingolipid biosynthetic process	BP	1	4	1021	5489	gene-G4B84_001007	0.561094	1	0.25
GO:0030705	cytoskeleton-dependent intracellular transport	BP	1	4	1021	5489	gene-G4B84_008549	0.561094	1	0.25
GO:0031098	stress-activated protein kinase signaling cascade	BP	1	4	1021	5489	gene-G4B84_000730	0.561094	1	0.25
GO:0031573	intra-S DNA damage checkpoint	BP	1	4	1021	5489	gene-G4B84_008596	0.561094	1	0.25
GO:0032509	endosome transport via multivesicular body sorting pathway	BP	1	4	1021	5489	gene-G4B84_006293	0.561094	1	0.25
GO:0032511	late endosome to vacuole transport via multivesicular body sorting pathway	BP	1	4	1021	5489	gene-G4B84_006293	0.561094	1	0.25
GO:0032880	regulation of protein localization	BP	1	4	1021	5489	gene-G4B84_000625	0.561094	1	0.25
GO:0042559	pteridine-containing compound biosynthetic process	BP	1	4	1021	5489	gene-G4B84_000127	0.561094	1	0.25
GO:0042773	ATP synthesis coupled electron transport	BP	1	4	1021	5489	gene-G4B84_000228	0.561094	1	0.25
GO:0042775	mitochondrial ATP synthesis coupled electron transport	BP	1	4	1021	5489	gene-G4B84_000228	0.561094	1	0.25
GO:0043410	positive regulation of MAPK cascade	BP	1	4	1021	5489	gene-G4B84_000730	0.561094	1	0.25
GO:0043605	cellular amide catabolic process	BP	1	4	1021	5489	gene-G4B84_000755	0.561094	1	0.25
GO:0044403	symbiont process	BP	1	4	1021	5489	gene-G4B84_012276	0.561094	1	0.25
GO:0044843	cell cycle G1/S phase transition	BP	1	4	1021	5489	gene-G4B84_011149	0.561094	1	0.25
GO:0045040	protein import into mitochondrial outer membrane	BP	1	4	1021	5489	gene-G4B84_000954	0.561094	1	0.25
GO:0045132	meiotic chromosome segregation	BP	1	4	1021	5489	gene-G4B84_005298	0.561094	1	0.25
GO:0046349	amino sugar biosynthetic process	BP	1	4	1021	5489	gene-G4B84_009950	0.561094	1	0.25
GO:0046364	monosaccharide biosynthetic process	BP	1	4	1021	5489	gene-G4B84_005333	0.561094	1	0.25
GO:0046777	protein autophosphorylation	BP	1	4	1021	5489	gene-G4B84_005298	0.561094	1	0.25
GO:0051205	protein insertion into membrane	BP	1	4	1021	5489	gene-G4B84_003392	0.561094	1	0.25
GO:0051403	stress-activated MAPK cascade	BP	1	4	1021	5489	gene-G4B84_000730	0.561094	1	0.25
GO:0051647	nucleus localization	BP	1	4	1021	5489	gene-G4B84_008549	0.561094	1	0.25
GO:0051788	response to misfolded protein	BP	1	4	1021	5489	gene-G4B84_008178	0.561094	1	0.25
GO:0052646	alditol phosphate metabolic process	BP	1	4	1021	5489	gene-G4B84_002588	0.561094	1	0.25
GO:0060341	regulation of cellular localization	BP	1	4	1021	5489	gene-G4B84_000625	0.561094	1	0.25
GO:0071173	spindle assembly checkpoint	BP	1	4	1021	5489	gene-G4B84_000625	0.561094	1	0.25
GO:0071218	cellular response to misfolded protein	BP	1	4	1021	5489	gene-G4B84_008178	0.561094	1	0.25
GO:0071985	multivesicular body sorting pathway	BP	1	4	1021	5489	gene-G4B84_006293	0.561094	1	0.25
GO:0099111	microtubule-based transport	BP	1	4	1021	5489	gene-G4B84_008549	0.561094	1	0.25
GO:1901073	glucosamine-containing compound biosynthetic process	BP	1	4	1021	5489	gene-G4B84_009950	0.561094	1	0.25
GO:1901983	regulation of protein acetylation	BP	1	4	1021	5489	gene-G4B84_003698	0.561094	1	0.25
GO:1903827	regulation of cellular protein localization	BP	1	4	1021	5489	gene-G4B84_000625	0.561094	1	0.25
GO:0004066	asparagine synthase (glutamine-hydrolyzing) activity	MF	1	4	1021	5489	gene-G4B84_008470	0.561094	1	0.25
GO:0004075	biotin carboxylase activity	MF	1	4	1021	5489	gene-G4B84_007651	0.561094	1	0.25
GO:0004185	serine-type carboxypeptidase activity	MF	1	4	1021	5489	gene-G4B84_004533	0.561094	1	0.25
GO:0004616	phosphogluconate dehydrogenase (decarboxylating) activity	MF	1	4	1021	5489	gene-G4B84_005381	0.561094	1	0.25
GO:0004622	lysophospholipase activity	MF	1	4	1021	5489	gene-G4B84_004784	0.561094	1	0.25
GO:0004843	thiol-dependent ubiquitin-specific protease activity	MF	1	4	1021	5489	gene-G4B84_012104	0.561094	1	0.25
GO:0005089	Rho guanyl-nucleotide exchange factor activity	MF	1	4	1021	5489	gene-G4B84_008570	0.561094	1	0.25
GO:0005253	anion channel activity	MF	1	4	1021	5489	gene-G4B84_011836	0.561094	1	0.25
GO:0005548	phospholipid transporter activity	MF	1	4	1021	5489	gene-G4B84_008397	0.561094	1	0.25
GO:0008131	primary amine oxidase activity	MF	1	4	1021	5489	gene-G4B84_002199	0.561094	1	0.25
GO:0008198	ferrous iron binding	MF	1	4	1021	5489	gene-G4B84_008876	0.561094	1	0.25
GO:0008308	voltage-gated anion channel activity	MF	1	4	1021	5489	gene-G4B84_011836	0.561094	1	0.25
GO:0016405	CoA-ligase activity	MF	1	4	1021	5489	gene-G4B84_000670	0.561094	1	0.25
GO:0016703	oxidoreductase activity, acting on single donors with incorporation of molecular oxygen, incorporation of one atom of oxygen (internal monooxygenases or internal mixed function oxidases)	MF	1	4	1021	5489	gene-G4B84_001313	0.561094	1	0.25
GO:0016782	transferase activity, transferring sulfur-containing groups	MF	1	4	1021	5489	gene-G4B84_000173	0.561094	1	0.25
GO:0016790	thiolester hydrolase activity	MF	1	4	1021	5489	gene-G4B84_001001	0.561094	1	0.25
GO:0016837	carbon-oxygen lyase activity, acting on polysaccharides	MF	1	4	1021	5489	gene-G4B84_009644	0.561094	1	0.25
GO:0016878	acid-thiol ligase activity	MF	1	4	1021	5489	gene-G4B84_000670	0.561094	1	0.25
GO:0018580	nitronate monooxygenase activity	MF	1	4	1021	5489	gene-G4B84_001313	0.561094	1	0.25
GO:0034593	phosphatidylinositol bisphosphate phosphatase activity	MF	1	4	1021	5489	gene-G4B84_005081	0.561094	1	0.25
GO:0034595	phosphatidylinositol phosphate 5-phosphatase activity	MF	1	4	1021	5489	gene-G4B84_005081	0.561094	1	0.25
GO:0052866	phosphatidylinositol phosphate phosphatase activity	MF	1	4	1021	5489	gene-G4B84_005081	0.561094	1	0.25
GO:0070008	serine-type exopeptidase activity	MF	1	4	1021	5489	gene-G4B84_004533	0.561094	1	0.25
GO:0070566	adenylyltransferase activity	MF	1	4	1021	5489	gene-G4B84_007903	0.561094	1	0.25
GO:0022627	cytosolic small ribosomal subunit	CC	1	4	1021	5489	gene-G4B84_010956	0.561094	1	0.25
GO:0030119	AP-type membrane coat adaptor complex	CC	1	4	1021	5489	gene-G4B84_000859	0.561094	1	0.25
GO:0030120	vesicle coat	CC	1	4	1021	5489	gene-G4B84_000859	0.561094	1	0.25
GO:0030658	transport vesicle membrane	CC	1	4	1021	5489	gene-G4B84_000859	0.561094	1	0.25
GO:0032865	ERMES complex	CC	1	4	1021	5489	gene-G4B84_000954	0.561094	1	0.25
GO:0035267	NuA4 histone acetyltransferase complex	CC	1	4	1021	5489	gene-G4B84_004903	0.561094	1	0.25
GO:0043189	H4/H2A histone acetyltransferase complex	CC	1	4	1021	5489	gene-G4B84_004903	0.561094	1	0.25
GO:0044232	organelle membrane contact site	CC	1	4	1021	5489	gene-G4B84_000954	0.561094	1	0.25
GO:0044233	Mitochondria-associated ER Membrane	CC	1	4	1021	5489	gene-G4B84_000954	0.561094	1	0.25
GO:0070847	core mediator complex	CC	1	4	1021	5489	gene-G4B84_004465	0.561094	1	0.25
GO:0009165	nucleotide biosynthetic process	BP	10	54	1021	5489	gene-G4B84_001976,gene-G4B84_002054,gene-G4B84_005333,gene-G4B84_006112,gene-G4B84_002853,gene-G4B84_009231,gene-G4B84_003881,gene-G4B84_004714,gene-G4B84_003786,gene-G4B84_010963	0.561805	1	0.185185
GO:0006796	phosphate-containing compound metabolic process	BP	62	337	1021	5489	gene-G4B84_002588,gene-G4B84_001523,gene-G4B84_001976,gene-G4B84_002054,gene-G4B84_005333,gene-G4B84_006112,gene-G4B84_002853,gene-G4B84_000228,gene-G4B84_000240,gene-G4B84_001922,gene-G4B84_005268,gene-G4B84_005285,gene-G4B84_005596,gene-G4B84_007493,gene-G4B84_008393,gene-G4B84_008418,gene-G4B84_008574,gene-G4B84_010987,gene-G4B84_011489,gene-G4B84_004475,gene-G4B84_001176,gene-G4B84_001001,gen…	0.562861	1	0.183976
GO:0044106	cellular amine metabolic process	BP	4	21	1021	5489	gene-G4B84_003881,gene-G4B84_007820,gene-G4B84_010044,gene-G4B84_000755	0.567091	1	0.190476
GO:0016053	organic acid biosynthetic process	BP	24	131	1021	5489	gene-G4B84_003207,gene-G4B84_001976,gene-G4B84_002054,gene-G4B84_005333,gene-G4B84_006112,gene-G4B84_002853,gene-G4B84_008470,gene-G4B84_006752,gene-G4B84_010963,gene-G4B84_000670,gene-G4B84_006095,gene-G4B84_007890,gene-G4B84_008218,gene-G4B84_008247,gene-G4B84_011552,gene-G4B84_012150,gene-G4B84_005125,gene-G4B84_007033,gene-G4B84_004781,gene-G4B84_008026,gene-G4B84_000127,gene-G4B84_001788,gen…	0.569434	1	0.183206
GO:0046394	carboxylic acid biosynthetic process	BP	24	131	1021	5489	gene-G4B84_003207,gene-G4B84_001976,gene-G4B84_002054,gene-G4B84_005333,gene-G4B84_006112,gene-G4B84_002853,gene-G4B84_008470,gene-G4B84_006752,gene-G4B84_010963,gene-G4B84_000670,gene-G4B84_006095,gene-G4B84_007890,gene-G4B84_008218,gene-G4B84_008247,gene-G4B84_011552,gene-G4B84_012150,gene-G4B84_005125,gene-G4B84_007033,gene-G4B84_004781,gene-G4B84_008026,gene-G4B84_000127,gene-G4B84_001788,gen…	0.569434	1	0.183206
GO:1901361	organic cyclic compound catabolic process	BP	11	60	1021	5489	gene-G4B84_001976,gene-G4B84_002054,gene-G4B84_005333,gene-G4B84_006112,gene-G4B84_002853,gene-G4B84_004428,gene-G4B84_010182,gene-G4B84_008363,gene-G4B84_007820,gene-G4B84_010172,gene-G4B84_003881	0.574113	1	0.183333
GO:0006164	purine nucleotide biosynthetic process	BP	7	38	1021	5489	gene-G4B84_001976,gene-G4B84_002054,gene-G4B84_005333,gene-G4B84_006112,gene-G4B84_002853,gene-G4B84_009231,gene-G4B84_004714	0.577369	1	0.184211
GO:0006030	chitin metabolic process	BP	2	10	1021	5489	gene-G4B84_009950,gene-G4B84_010458	0.580678	1	0.2
GO:0006612	protein targeting to membrane	BP	2	10	1021	5489	gene-G4B84_003015,gene-G4B84_011632	0.580678	1	0.2
GO:0016197	endosomal transport	BP	2	10	1021	5489	gene-G4B84_006293,gene-G4B84_000859	0.580678	1	0.2
GO:0030488	tRNA methylation	BP	2	10	1021	5489	gene-G4B84_008555,gene-G4B84_009065	0.580678	1	0.2
GO:0036503	ERAD pathway	BP	2	10	1021	5489	gene-G4B84_003015,gene-G4B84_003673	0.580678	1	0.2
GO:0042493	response to drug	BP	2	10	1021	5489	gene-G4B84_008381,gene-G4B84_008675	0.580678	1	0.2
GO:0051304	chromosome separation	BP	2	10	1021	5489	gene-G4B84_000625,gene-G4B84_002552	0.580678	1	0.2
GO:0003993	acid phosphatase activity	MF	2	10	1021	5489	gene-G4B84_010418,gene-G4B84_008458	0.580678	1	0.2
GO:0016866	intramolecular transferase activity	MF	2	10	1021	5489	gene-G4B84_002365,gene-G4B84_009408	0.580678	1	0.2
GO:0030695	GTPase regulator activity	MF	2	10	1021	5489	gene-G4B84_005337,gene-G4B84_010956	0.580678	1	0.2
GO:0022626	cytosolic ribosome	CC	2	10	1021	5489	gene-G4B84_010956,gene-G4B84_008178	0.580678	1	0.2
GO:0031304	intrinsic component of mitochondrial inner membrane	CC	2	10	1021	5489	gene-G4B84_002602,gene-G4B84_006697	0.580678	1	0.2
GO:0006468	protein phosphorylation	BP	16	88	1021	5489	gene-G4B84_009385,gene-G4B84_010091,gene-G4B84_010350,gene-G4B84_000730,gene-G4B84_005298,gene-G4B84_000240,gene-G4B84_001922,gene-G4B84_005268,gene-G4B84_005285,gene-G4B84_005596,gene-G4B84_007493,gene-G4B84_008393,gene-G4B84_008418,gene-G4B84_008574,gene-G4B84_010987,gene-G4B84_011489	0.584303	1	0.181818
GO:0009117	nucleotide metabolic process	BP	16	88	1021	5489	gene-G4B84_001523,gene-G4B84_001976,gene-G4B84_002054,gene-G4B84_005333,gene-G4B84_006112,gene-G4B84_002853,gene-G4B84_000228,gene-G4B84_001001,gene-G4B84_009231,gene-G4B84_010963,gene-G4B84_003881,gene-G4B84_002463,gene-G4B84_011428,gene-G4B84_004714,gene-G4B84_003786,gene-G4B84_004088	0.584303	1	0.181818
GO:1901605	alpha-amino acid metabolic process	BP	16	88	1021	5489	gene-G4B84_003207,gene-G4B84_003402,gene-G4B84_008470,gene-G4B84_008052,gene-G4B84_006752,gene-G4B84_010963,gene-G4B84_009832,gene-G4B84_010587,gene-G4B84_006864,gene-G4B84_008363,gene-G4B84_003881,gene-G4B84_008026,gene-G4B84_007820,gene-G4B84_002774,gene-G4B84_002974,gene-G4B84_006020	0.584303	1	0.181818
GO:0015075	ion transmembrane transporter activity	MF	18	99	1021	5489	gene-G4B84_004710,gene-G4B84_006425,gene-G4B84_011836,gene-G4B84_006917,gene-G4B84_010294,gene-G4B84_007857,gene-G4B84_000411,gene-G4B84_008497,gene-G4B84_002027,gene-G4B84_003919,gene-G4B84_000189,gene-G4B84_003478,gene-G4B84_009231,gene-G4B84_004714,gene-G4B84_010644,gene-G4B84_001739,gene-G4B84_000045,gene-G4B84_004878	0.584373	1	0.181818
GO:0007088	regulation of mitotic nuclear division	BP	3	16	1021	5489	gene-G4B84_000625,gene-G4B84_002552,gene-G4B84_008549	0.594557	1	0.1875
GO:0043648	dicarboxylic acid metabolic process	BP	3	16	1021	5489	gene-G4B84_008052,gene-G4B84_006752,gene-G4B84_002774	0.594557	1	0.1875
GO:0070897	transcription preinitiation complex assembly	BP	3	16	1021	5489	gene-G4B84_000755,gene-G4B84_005224,gene-G4B84_006230	0.594557	1	0.1875
GO:0016702	oxidoreductase activity, acting on single donors with incorporation of molecular oxygen, incorporation of two atoms of oxygen	MF	3	16	1021	5489	gene-G4B84_002972,gene-G4B84_005822,gene-G4B84_009940	0.594557	1	0.1875
GO:0006810	transport	BP	122	666	1021	5489	gene-G4B84_000617,gene-G4B84_006917,gene-G4B84_010294,gene-G4B84_007857,gene-G4B84_000859,gene-G4B84_004705,gene-G4B84_008098,gene-G4B84_003015,gene-G4B84_002176,gene-G4B84_000189,gene-G4B84_007079,gene-G4B84_001850,gene-G4B84_011836,gene-G4B84_006425,gene-G4B84_007756,gene-G4B84_009950,gene-G4B84_001007,gene-G4B84_009497,gene-G4B84_005602,gene-G4B84_000411,gene-G4B84_001365,gene-G4B84_008076,gen…	0.596799	1	0.183183
GO:0006793	phosphorus metabolic process	BP	62	341	1021	5489	gene-G4B84_002588,gene-G4B84_001523,gene-G4B84_001976,gene-G4B84_002054,gene-G4B84_005333,gene-G4B84_006112,gene-G4B84_002853,gene-G4B84_000228,gene-G4B84_000240,gene-G4B84_001922,gene-G4B84_005268,gene-G4B84_005285,gene-G4B84_005596,gene-G4B84_007493,gene-G4B84_008393,gene-G4B84_008418,gene-G4B84_008574,gene-G4B84_010987,gene-G4B84_011489,gene-G4B84_004475,gene-G4B84_001176,gene-G4B84_001001,gen…	0.604453	1	0.181818
GO:0006473	protein acetylation	BP	4	22	1021	5489	gene-G4B84_003362,gene-G4B84_004919,gene-G4B84_005224,gene-G4B84_003698	0.606355	1	0.181818
GO:0044036	cell wall macromolecule metabolic process	BP	4	22	1021	5489	gene-G4B84_002656,gene-G4B84_009950,gene-G4B84_002997,gene-G4B84_007467	0.606355	1	0.181818
GO:0098656	anion transmembrane transport	BP	7	39	1021	5489	gene-G4B84_006917,gene-G4B84_010294,gene-G4B84_007857,gene-G4B84_000349,gene-G4B84_001739,gene-G4B84_004878,gene-G4B84_011836	0.606818	1	0.179487
GO:0051234	establishment of localization	BP	123	673	1021	5489	gene-G4B84_000617,gene-G4B84_008549,gene-G4B84_006917,gene-G4B84_010294,gene-G4B84_007857,gene-G4B84_000859,gene-G4B84_004705,gene-G4B84_008098,gene-G4B84_003015,gene-G4B84_000931,gene-G4B84_003392,gene-G4B84_004423,gene-G4B84_004762,gene-G4B84_005337,gene-G4B84_005742,gene-G4B84_005775,gene-G4B84_006003,gene-G4B84_007488,gene-G4B84_009882,gene-G4B84_009986,gene-G4B84_010565,gene-G4B84_012045,gen…	0.608755	1	0.182764
GO:0044283	small molecule biosynthetic process	BP	29	161	1021	5489	gene-G4B84_003207,gene-G4B84_005333,gene-G4B84_001976,gene-G4B84_002054,gene-G4B84_006112,gene-G4B84_002853,gene-G4B84_008470,gene-G4B84_006752,gene-G4B84_010963,gene-G4B84_000670,gene-G4B84_006095,gene-G4B84_007890,gene-G4B84_008218,gene-G4B84_008247,gene-G4B84_011552,gene-G4B84_012150,gene-G4B84_005125,gene-G4B84_007033,gene-G4B84_006699,gene-G4B84_010670,gene-G4B84_011944,gene-G4B84_004781,gen…	0.609776	1	0.180124
GO:0015318	inorganic molecular entity transmembrane transporter activity	MF	17	95	1021	5489	gene-G4B84_004710,gene-G4B84_006425,gene-G4B84_011836,gene-G4B84_006917,gene-G4B84_010294,gene-G4B84_007857,gene-G4B84_001850,gene-G4B84_000411,gene-G4B84_008497,gene-G4B84_002027,gene-G4B84_003919,gene-G4B84_009231,gene-G4B84_004714,gene-G4B84_010644,gene-G4B84_001739,gene-G4B84_000045,gene-G4B84_004878	0.612743	1	0.178947
GO:0016853	isomerase activity	MF	11	62	1021	5489	gene-G4B84_002475,gene-G4B84_010686,gene-G4B84_011953,gene-G4B84_011653,gene-G4B84_004812,gene-G4B84_005332,gene-G4B84_005333,gene-G4B84_002365,gene-G4B84_009408,gene-G4B84_002787,gene-G4B84_002976	0.62097	1	0.177419
GO:0000725	recombinational repair	BP	2	11	1021	5489	gene-G4B84_000722,gene-G4B84_008596	0.635012	1	0.181818
GO:0006869	lipid transport	BP	2	11	1021	5489	gene-G4B84_000670,gene-G4B84_008397	0.635012	1	0.181818
GO:0006897	endocytosis	BP	2	11	1021	5489	gene-G4B84_001007,gene-G4B84_009497	0.635012	1	0.181818
GO:0009247	glycolipid biosynthetic process	BP	2	11	1021	5489	gene-G4B84_001176,gene-G4B84_001007	0.635012	1	0.181818
GO:0034599	cellular response to oxidative stress	BP	2	11	1021	5489	gene-G4B84_008381,gene-G4B84_008675	0.635012	1	0.181818
GO:0008276	protein methyltransferase activity	MF	2	11	1021	5489	gene-G4B84_009862,gene-G4B84_008596	0.635012	1	0.181818
GO:0016641	oxidoreductase activity, acting on the CH-NH2 group of donors, oxygen as acceptor	MF	2	11	1021	5489	gene-G4B84_011944,gene-G4B84_002199	0.635012	1	0.181818
GO:0072522	purine-containing compound biosynthetic process	BP	7	40	1021	5489	gene-G4B84_001976,gene-G4B84_002054,gene-G4B84_005333,gene-G4B84_006112,gene-G4B84_002853,gene-G4B84_009231,gene-G4B84_004714	0.635146	1	0.175
GO:0008509	anion transmembrane transporter activity	MF	7	40	1021	5489	gene-G4B84_011836,gene-G4B84_006917,gene-G4B84_010294,gene-G4B84_007857,gene-G4B84_010644,gene-G4B84_001739,gene-G4B84_004878	0.635146	1	0.175
GO:0032984	protein-containing complex disassembly	BP	3	17	1021	5489	gene-G4B84_008315,gene-G4B84_008107,gene-G4B84_008549	0.637918	1	0.176471
GO:2000241	regulation of reproductive process	BP	3	17	1021	5489	gene-G4B84_000345,gene-G4B84_000730,gene-G4B84_008596	0.637918	1	0.176471
GO:0060589	nucleoside-triphosphatase regulator activity	MF	3	17	1021	5489	gene-G4B84_008178,gene-G4B84_005337,gene-G4B84_010956	0.637918	1	0.176471
GO:0031248	protein acetyltransferase complex	CC	3	17	1021	5489	gene-G4B84_004919,gene-G4B84_005224,gene-G4B84_004903	0.637918	1	0.176471
GO:0090575	RNA polymerase II transcription factor complex	CC	3	17	1021	5489	gene-G4B84_005224,gene-G4B84_006230,gene-G4B84_004465	0.637918	1	0.176471
GO:1902493	acetyltransferase complex	CC	3	17	1021	5489	gene-G4B84_004919,gene-G4B84_005224,gene-G4B84_004903	0.637918	1	0.176471
GO:0016740	transferase activity	MF	122	672	1021	5489	gene-G4B84_009385,gene-G4B84_010091,gene-G4B84_010350,gene-G4B84_006699,gene-G4B84_004781,gene-G4B84_001788,gene-G4B84_002669,gene-G4B84_008052,gene-G4B84_007903,gene-G4B84_009832,gene-G4B84_008433,gene-G4B84_012105,gene-G4B84_012150,gene-G4B84_002588,gene-G4B84_001976,gene-G4B84_002054,gene-G4B84_006112,gene-G4B84_008026,gene-G4B84_011931,gene-G4B84_003158,gene-G4B84_010677,gene-G4B84_000240,gen…	0.641643	1	0.181548
GO:0016887	ATPase activity	MF	16	91	1021	5489	gene-G4B84_000722,gene-G4B84_007635,gene-G4B84_004710,gene-G4B84_001169,gene-G4B84_006515,gene-G4B84_009684,gene-G4B84_009741,gene-G4B84_009858,gene-G4B84_004091,gene-G4B84_007294,gene-G4B84_008397,gene-G4B84_009231,gene-G4B84_008549,gene-G4B84_001106,gene-G4B84_003015,gene-G4B84_003392	0.641876	1	0.175824
GO:0000105	histidine biosynthetic process	BP	1	5	1021	5489	gene-G4B84_003207	0.642794	1	0.2
GO:0005984	disaccharide metabolic process	BP	1	5	1021	5489	gene-G4B84_000188	0.642794	1	0.2
GO:0006098	pentose-phosphate shunt	BP	1	5	1021	5489	gene-G4B84_005333	0.642794	1	0.2
GO:0006099	tricarboxylic acid cycle	BP	1	5	1021	5489	gene-G4B84_003150	0.642794	1	0.2
GO:0006101	citrate metabolic process	BP	1	5	1021	5489	gene-G4B84_003150	0.642794	1	0.2
GO:0006282	regulation of DNA repair	BP	1	5	1021	5489	gene-G4B84_005298	0.642794	1	0.2
GO:0006547	histidine metabolic process	BP	1	5	1021	5489	gene-G4B84_003207	0.642794	1	0.2
GO:0006721	terpenoid metabolic process	BP	1	5	1021	5489	gene-G4B84_002365	0.642794	1	0.2
GO:0006743	ubiquinone metabolic process	BP	1	5	1021	5489	gene-G4B84_010670	0.642794	1	0.2
GO:0006744	ubiquinone biosynthetic process	BP	1	5	1021	5489	gene-G4B84_010670	0.642794	1	0.2
GO:0006750	glutathione biosynthetic process	BP	1	5	1021	5489	gene-G4B84_008060	0.642794	1	0.2
GO:0007584	response to nutrient	BP	1	5	1021	5489	gene-G4B84_000755	0.642794	1	0.2
GO:0009267	cellular response to starvation	BP	1	5	1021	5489	gene-G4B84_002552	0.642794	1	0.2
GO:0009435	NAD biosynthetic process	BP	1	5	1021	5489	gene-G4B84_003881	0.642794	1	0.2
GO:0009896	positive regulation of catabolic process	BP	1	5	1021	5489	gene-G4B84_000755	0.642794	1	0.2
GO:0009967	positive regulation of signal transduction	BP	1	5	1021	5489	gene-G4B84_000730	0.642794	1	0.2
GO:0010647	positive regulation of cell communication	BP	1	5	1021	5489	gene-G4B84_000730	0.642794	1	0.2
GO:0016114	terpenoid biosynthetic process	BP	1	5	1021	5489	gene-G4B84_002365	0.642794	1	0.2
GO:0016125	sterol metabolic process	BP	1	5	1021	5489	gene-G4B84_006699	0.642794	1	0.2
GO:0016579	protein deubiquitination	BP	1	5	1021	5489	gene-G4B84_003971	0.642794	1	0.2
GO:0019441	tryptophan catabolic process to kynurenine	BP	1	5	1021	5489	gene-G4B84_007820	0.642794	1	0.2
GO:0019682	glyceraldehyde-3-phosphate metabolic process	BP	1	5	1021	5489	gene-G4B84_005333	0.642794	1	0.2
GO:0022904	respiratory electron transport chain	BP	1	5	1021	5489	gene-G4B84_000228	0.642794	1	0.2
GO:0023056	positive regulation of signaling	BP	1	5	1021	5489	gene-G4B84_000730	0.642794	1	0.2
GO:0031331	positive regulation of cellular catabolic process	BP	1	5	1021	5489	gene-G4B84_000755	0.642794	1	0.2
GO:0031577	spindle checkpoint	BP	1	5	1021	5489	gene-G4B84_000625	0.642794	1	0.2
GO:0031670	cellular response to nutrient	BP	1	5	1021	5489	gene-G4B84_000755	0.642794	1	0.2
GO:0032886	regulation of microtubule-based process	BP	1	5	1021	5489	gene-G4B84_008549	0.642794	1	0.2
GO:0033046	negative regulation of sister chromatid segregation	BP	1	5	1021	5489	gene-G4B84_000625	0.642794	1	0.2
GO:0033048	negative regulation of mitotic sister chromatid segregation	BP	1	5	1021	5489	gene-G4B84_000625	0.642794	1	0.2
GO:0034629	cellular protein-containing complex localization	BP	1	5	1021	5489	gene-G4B84_000625	0.642794	1	0.2
GO:0035335	peptidyl-tyrosine dephosphorylation	BP	1	5	1021	5489	gene-G4B84_000359	0.642794	1	0.2
GO:0036092	phosphatidylinositol-3-phosphate biosynthetic process	BP	1	5	1021	5489	gene-G4B84_005081	0.642794	1	0.2
GO:0042144	vacuole fusion, non-autophagic	BP	1	5	1021	5489	gene-G4B84_008098	0.642794	1	0.2
GO:0042594	response to starvation	BP	1	5	1021	5489	gene-G4B84_002552	0.642794	1	0.2
GO:0043244	regulation of protein complex disassembly	BP	1	5	1021	5489	gene-G4B84_008107	0.642794	1	0.2
GO:0043408	regulation of MAPK cascade	BP	1	5	1021	5489	gene-G4B84_000730	0.642794	1	0.2
GO:0043545	molybdopterin cofactor metabolic process	BP	1	5	1021	5489	gene-G4B84_004088	0.642794	1	0.2
GO:0044038	cell wall macromolecule biosynthetic process	BP	1	5	1021	5489	gene-G4B84_009950	0.642794	1	0.2
GO:0045839	negative regulation of mitotic nuclear division	BP	1	5	1021	5489	gene-G4B84_000625	0.642794	1	0.2
GO:0045841	negative regulation of mitotic metaphase/anaphase transition	BP	1	5	1021	5489	gene-G4B84_000625	0.642794	1	0.2
GO:0051189	prosthetic group metabolic process	BP	1	5	1021	5489	gene-G4B84_004088	0.642794	1	0.2
GO:0051278	fungal-type cell wall polysaccharide biosynthetic process	BP	1	5	1021	5489	gene-G4B84_009950	0.642794	1	0.2
GO:0051494	negative regulation of cytoskeleton organization	BP	1	5	1021	5489	gene-G4B84_008549	0.642794	1	0.2
GO:0051985	negative regulation of chromosome segregation	BP	1	5	1021	5489	gene-G4B84_000625	0.642794	1	0.2
GO:0052803	imidazole-containing compound metabolic process	BP	1	5	1021	5489	gene-G4B84_003207	0.642794	1	0.2
GO:0070507	regulation of microtubule cytoskeleton organization	BP	1	5	1021	5489	gene-G4B84_008549	0.642794	1	0.2
GO:0070589	cellular component macromolecule biosynthetic process	BP	1	5	1021	5489	gene-G4B84_009950	0.642794	1	0.2
GO:0070592	cell wall polysaccharide biosynthetic process	BP	1	5	1021	5489	gene-G4B84_009950	0.642794	1	0.2
GO:0070646	protein modification by small protein removal	BP	1	5	1021	5489	gene-G4B84_003971	0.642794	1	0.2
GO:0071174	mitotic spindle checkpoint	BP	1	5	1021	5489	gene-G4B84_000625	0.642794	1	0.2
GO:0072523	purine-containing compound catabolic process	BP	1	5	1021	5489	gene-G4B84_004428	0.642794	1	0.2
GO:1901661	quinone metabolic process	BP	1	5	1021	5489	gene-G4B84_010670	0.642794	1	0.2
GO:1901663	quinone biosynthetic process	BP	1	5	1021	5489	gene-G4B84_010670	0.642794	1	0.2
GO:1902100	negative regulation of metaphase/anaphase transition of cell cycle	BP	1	5	1021	5489	gene-G4B84_000625	0.642794	1	0.2
GO:1902533	positive regulation of intracellular signal transduction	BP	1	5	1021	5489	gene-G4B84_000730	0.642794	1	0.2
GO:1903008	organelle disassembly	BP	1	5	1021	5489	gene-G4B84_008549	0.642794	1	0.2
GO:1905819	negative regulation of chromosome separation	BP	1	5	1021	5489	gene-G4B84_000625	0.642794	1	0.2
GO:2000816	negative regulation of mitotic sister chromatid separation	BP	1	5	1021	5489	gene-G4B84_000625	0.642794	1	0.2
GO:2001020	regulation of response to DNA damage stimulus	BP	1	5	1021	5489	gene-G4B84_005298	0.642794	1	0.2
GO:0004061	arylformamidase activity	MF	1	5	1021	5489	gene-G4B84_007820	0.642794	1	0.2
GO:0004559	alpha-mannosidase activity	MF	1	5	1021	5489	gene-G4B84_003206	0.642794	1	0.2
GO:0004725	protein tyrosine phosphatase activity	MF	1	5	1021	5489	gene-G4B84_000359	0.642794	1	0.2
GO:0005088	Ras guanyl-nucleotide exchange factor activity	MF	1	5	1021	5489	gene-G4B84_008570	0.642794	1	0.2
GO:0005244	voltage-gated ion channel activity	MF	1	5	1021	5489	gene-G4B84_011836	0.642794	1	0.2
GO:0008169	C-methyltransferase activity	MF	1	5	1021	5489	gene-G4B84_006699	0.642794	1	0.2
GO:0008375	acetylglucosaminyltransferase activity	MF	1	5	1021	5489	gene-G4B84_001176	0.642794	1	0.2
GO:0008897	holo-[acyl-carrier-protein] synthase activity	MF	1	5	1021	5489	gene-G4B84_008247	0.642794	1	0.2
GO:0016886	ligase activity, forming phosphoric ester bonds	MF	1	5	1021	5489	gene-G4B84_010954	0.642794	1	0.2
GO:0019901	protein kinase binding	MF	1	5	1021	5489	gene-G4B84_003867	0.642794	1	0.2
GO:0022832	voltage-gated channel activity	MF	1	5	1021	5489	gene-G4B84_011836	0.642794	1	0.2
GO:0031369	translation initiation factor binding	MF	1	5	1021	5489	gene-G4B84_010956	0.642794	1	0.2
GO:0042162	telomeric DNA binding	MF	1	5	1021	5489	gene-G4B84_007635	0.642794	1	0.2
GO:0042393	histone binding	MF	1	5	1021	5489	gene-G4B84_008596	0.642794	1	0.2
GO:0048038	quinone binding	MF	1	5	1021	5489	gene-G4B84_002199	0.642794	1	0.2
GO:0005656	nuclear pre-replicative complex	CC	1	5	1021	5489	gene-G4B84_009282	0.642794	1	0.2
GO:0005791	rough endoplasmic reticulum	CC	1	5	1021	5489	gene-G4B84_011632	0.642794	1	0.2
GO:0030867	rough endoplasmic reticulum membrane	CC	1	5	1021	5489	gene-G4B84_011632	0.642794	1	0.2
GO:0031261	DNA replication preinitiation complex	CC	1	5	1021	5489	gene-G4B84_000390	0.642794	1	0.2
GO:0036387	pre-replicative complex	CC	1	5	1021	5489	gene-G4B84_009282	0.642794	1	0.2
GO:0043614	multi-eIF complex	CC	1	5	1021	5489	gene-G4B84_010956	0.642794	1	0.2
GO:0045263	proton-transporting ATP synthase complex, coupling factor F(o)	CC	1	5	1021	5489	gene-G4B84_004714	0.642794	1	0.2
GO:0098799	outer mitochondrial membrane protein complex	CC	1	5	1021	5489	gene-G4B84_000954	0.642794	1	0.2
GO:0015078	proton transmembrane transporter activity	MF	4	23	1021	5489	gene-G4B84_000411,gene-G4B84_009231,gene-G4B84_000045,gene-G4B84_004714	0.643361	1	0.173913
GO:0035556	intracellular signal transduction	BP	11	63	1021	5489	gene-G4B84_009385,gene-G4B84_010091,gene-G4B84_010350,gene-G4B84_005511,gene-G4B84_003460,gene-G4B84_004446,gene-G4B84_007101,gene-G4B84_012171,gene-G4B84_000730,gene-G4B84_008570,gene-G4B84_006370	0.6434	1	0.174603
GO:0006357	regulation of transcription by RNA polymerase II	BP	34	191	1021	5489	gene-G4B84_004465,gene-G4B84_000755,gene-G4B84_000137,gene-G4B84_008257,gene-G4B84_011149,gene-G4B84_000966,gene-G4B84_001167,gene-G4B84_001598,gene-G4B84_001735,gene-G4B84_001743,gene-G4B84_002267,gene-G4B84_002627,gene-G4B84_003362,gene-G4B84_003654,gene-G4B84_004427,gene-G4B84_004626,gene-G4B84_004815,gene-G4B84_004955,gene-G4B84_005753,gene-G4B84_005804,gene-G4B84_005816,gene-G4B84_006027,gen…	0.643469	1	0.17801
GO:0009064	glutamine family amino acid metabolic process	BP	5	29	1021	5489	gene-G4B84_003402,gene-G4B84_008052,gene-G4B84_006752,gene-G4B84_008363,gene-G4B84_002774	0.649558	1	0.172414
GO:0072341	modified amino acid binding	MF	5	29	1021	5489	gene-G4B84_004659,gene-G4B84_006937,gene-G4B84_007517,gene-G4B84_009652,gene-G4B84_008060	0.649558	1	0.172414
GO:0065002	intracellular protein transmembrane transport	BP	3	18	1021	5489	gene-G4B84_003015,gene-G4B84_003271,gene-G4B84_011632	0.677918	1	0.166667
GO:0071806	protein transmembrane transport	BP	3	18	1021	5489	gene-G4B84_003015,gene-G4B84_003271,gene-G4B84_011632	0.677918	1	0.166667
GO:1902600	proton transmembrane transport	BP	3	18	1021	5489	gene-G4B84_004714,gene-G4B84_000045,gene-G4B84_009231	0.677918	1	0.166667
GO:0003682	chromatin binding	MF	3	18	1021	5489	gene-G4B84_008596,gene-G4B84_005224,gene-G4B84_009282	0.677918	1	0.166667
GO:0005667	transcription factor complex	CC	3	18	1021	5489	gene-G4B84_005224,gene-G4B84_006230,gene-G4B84_004465	0.677918	1	0.166667
GO:0044798	nuclear transcription factor complex	CC	3	18	1021	5489	gene-G4B84_005224,gene-G4B84_006230,gene-G4B84_004465	0.677918	1	0.166667
GO:0015931	nucleobase-containing compound transport	BP	4	24	1021	5489	gene-G4B84_000617,gene-G4B84_000349,gene-G4B84_000625,gene-G4B84_003176	0.678	1	0.166667
GO:0048878	chemical homeostasis	BP	4	24	1021	5489	gene-G4B84_001976,gene-G4B84_002054,gene-G4B84_006112,gene-G4B84_004878	0.678	1	0.166667
GO:0016758	transferase activity, transferring hexosyl groups	MF	4	24	1021	5489	gene-G4B84_006407,gene-G4B84_001176,gene-G4B84_001244,gene-G4B84_005381	0.678	1	0.166667
GO:1901657	glycosyl compound metabolic process	BP	5	30	1021	5489	gene-G4B84_003116,gene-G4B84_004032,gene-G4B84_010169,gene-G4B84_008555,gene-G4B84_004088	0.680451	1	0.166667
GO:0000002	mitochondrial genome maintenance	BP	2	12	1021	5489	gene-G4B84_000954,gene-G4B84_003150	0.683662	1	0.166667
GO:0000122	negative regulation of transcription by RNA polymerase II	BP	2	12	1021	5489	gene-G4B84_000137,gene-G4B84_004465	0.683662	1	0.166667
GO:0000413	protein peptidyl-prolyl isomerization	BP	2	12	1021	5489	gene-G4B84_002475,gene-G4B84_010686	0.683662	1	0.166667
GO:0006270	DNA replication initiation	BP	2	12	1021	5489	gene-G4B84_009282,gene-G4B84_007007	0.683662	1	0.166667
GO:0006555	methionine metabolic process	BP	2	12	1021	5489	gene-G4B84_008026,gene-G4B84_006864	0.683662	1	0.166667
GO:0006664	glycolipid metabolic process	BP	2	12	1021	5489	gene-G4B84_001176,gene-G4B84_001007	0.683662	1	0.166667
GO:0007163	establishment or maintenance of cell polarity	BP	2	12	1021	5489	gene-G4B84_008549,gene-G4B84_009497	0.683662	1	0.166667
GO:0031401	positive regulation of protein modification process	BP	2	12	1021	5489	gene-G4B84_000730,gene-G4B84_003698	0.683662	1	0.166667
GO:0051049	regulation of transport	BP	2	12	1021	5489	gene-G4B84_011836,gene-G4B84_000625	0.683662	1	0.166667
GO:0098657	import into cell	BP	2	12	1021	5489	gene-G4B84_001007,gene-G4B84_009497	0.683662	1	0.166667
GO:1903509	liposaccharide metabolic process	BP	2	12	1021	5489	gene-G4B84_001176,gene-G4B84_001007	0.683662	1	0.166667
GO:0003684	damaged DNA binding	MF	2	12	1021	5489	gene-G4B84_007635,gene-G4B84_012110	0.683662	1	0.166667
GO:0003755	peptidyl-prolyl cis-trans isomerase activity	MF	2	12	1021	5489	gene-G4B84_002475,gene-G4B84_010686	0.683662	1	0.166667
GO:0008094	DNA-dependent ATPase activity	MF	2	12	1021	5489	gene-G4B84_000722,gene-G4B84_007635	0.683662	1	0.166667
GO:0016859	cis-trans isomerase activity	MF	2	12	1021	5489	gene-G4B84_002475,gene-G4B84_010686	0.683662	1	0.166667
GO:0019829	cation-transporting ATPase activity	MF	2	12	1021	5489	gene-G4B84_009231,gene-G4B84_004710	0.683662	1	0.166667
GO:0022853	active ion transmembrane transporter activity	MF	2	12	1021	5489	gene-G4B84_004710,gene-G4B84_009231	0.683662	1	0.166667
GO:0042625	ATPase coupled ion transmembrane transporter activity	MF	2	12	1021	5489	gene-G4B84_004710,gene-G4B84_009231	0.683662	1	0.166667
GO:0005778	peroxisomal membrane	CC	2	12	1021	5489	gene-G4B84_002946,gene-G4B84_003271	0.683662	1	0.166667
GO:0031903	microbody membrane	CC	2	12	1021	5489	gene-G4B84_003271,gene-G4B84_002946	0.683662	1	0.166667
GO:0033290	eukaryotic 48S preinitiation complex	CC	2	12	1021	5489	gene-G4B84_003393,gene-G4B84_010956	0.683662	1	0.166667
GO:0070993	translation preinitiation complex	CC	2	12	1021	5489	gene-G4B84_003393,gene-G4B84_010956	0.683662	1	0.166667
GO:0016788	hydrolase activity, acting on ester bonds	MF	30	172	1021	5489	gene-G4B84_010418,gene-G4B84_008458,gene-G4B84_006370,gene-G4B84_005081,gene-G4B84_010182,gene-G4B84_006771,gene-G4B84_004784,gene-G4B84_000359,gene-G4B84_004996,gene-G4B84_006187,gene-G4B84_008311,gene-G4B84_008359,gene-G4B84_003517,gene-G4B84_005238,gene-G4B84_001948,gene-G4B84_003198,gene-G4B84_008673,gene-G4B84_008865,gene-G4B84_009981,gene-G4B84_005021,gene-G4B84_008283,gene-G4B84_002656,gen…	0.684872	1	0.174419
GO:0098660	inorganic ion transmembrane transport	BP	7	42	1021	5489	gene-G4B84_000045,gene-G4B84_009231,gene-G4B84_004714,gene-G4B84_008497,gene-G4B84_002027,gene-G4B84_003919,gene-G4B84_004878	0.688132	1	0.166667
GO:0051726	regulation of cell cycle	BP	8	48	1021	5489	gene-G4B84_000625,gene-G4B84_002552,gene-G4B84_008596,gene-G4B84_008549,gene-G4B84_000345,gene-G4B84_000730,gene-G4B84_000859,gene-G4B84_011136	0.692528	1	0.166667
GO:0065008	regulation of biological quality	BP	15	89	1021	5489	gene-G4B84_007635,gene-G4B84_001976,gene-G4B84_002054,gene-G4B84_006112,gene-G4B84_000407,gene-G4B84_009144,gene-G4B84_010963,gene-G4B84_009832,gene-G4B84_010587,gene-G4B84_004842,gene-G4B84_008052,gene-G4B84_000309,gene-G4B84_008397,gene-G4B84_004878,gene-G4B84_000755	0.706995	1	0.168539
GO:0000055	ribosomal large subunit export from nucleus	BP	1	6	1021	5489	gene-G4B84_000617	0.709298	1	0.166667
GO:0000165	MAPK cascade	BP	1	6	1021	5489	gene-G4B84_000730	0.709298	1	0.166667
GO:0006084	acetyl-CoA metabolic process	BP	1	6	1021	5489	gene-G4B84_001523	0.709298	1	0.166667
GO:0006267	pre-replicative complex assembly involved in nuclear cell cycle DNA replication	BP	1	6	1021	5489	gene-G4B84_009282	0.709298	1	0.166667
GO:0006334	nucleosome assembly	BP	1	6	1021	5489	gene-G4B84_003362	0.709298	1	0.166667
GO:0006515	protein quality control for misfolded or incompletely synthesized proteins	BP	1	6	1021	5489	gene-G4B84_008178	0.709298	1	0.166667
GO:0006613	cotranslational protein targeting to membrane	BP	1	6	1021	5489	gene-G4B84_003015	0.709298	1	0.166667
GO:0006614	SRP-dependent cotranslational protein targeting to membrane	BP	1	6	1021	5489	gene-G4B84_003015	0.709298	1	0.166667
GO:0006662	glycerol ether metabolic process	BP	1	6	1021	5489	gene-G4B84_009144	0.709298	1	0.166667
GO:0006730	one-carbon metabolic process	BP	1	6	1021	5489	gene-G4B84_006864	0.709298	1	0.166667
GO:0006739	NADP metabolic process	BP	1	6	1021	5489	gene-G4B84_005333	0.709298	1	0.166667
GO:0006904	vesicle docking involved in exocytosis	BP	1	6	1021	5489	gene-G4B84_005602	0.709298	1	0.166667
GO:0007127	meiosis I	BP	1	6	1021	5489	gene-G4B84_005298	0.709298	1	0.166667
GO:0009311	oligosaccharide metabolic process	BP	1	6	1021	5489	gene-G4B84_000188	0.709298	1	0.166667
GO:0015985	energy coupled proton transport, down electrochemical gradient	BP	1	6	1021	5489	gene-G4B84_004714	0.709298	1	0.166667
GO:0015986	ATP synthesis coupled proton transport	BP	1	6	1021	5489	gene-G4B84_004714	0.709298	1	0.166667
GO:0018065	protein-cofactor linkage	BP	1	6	1021	5489	gene-G4B84_000228	0.709298	1	0.166667
GO:0019184	nonribosomal peptide biosynthetic process	BP	1	6	1021	5489	gene-G4B84_008060	0.709298	1	0.166667
GO:0019674	NAD metabolic process	BP	1	6	1021	5489	gene-G4B84_003881	0.709298	1	0.166667
GO:0022900	electron transport chain	BP	1	6	1021	5489	gene-G4B84_000228	0.709298	1	0.166667
GO:0031365	N-terminal protein amino acid modification	BP	1	6	1021	5489	gene-G4B84_003698	0.709298	1	0.166667
GO:0032271	regulation of protein polymerization	BP	1	6	1021	5489	gene-G4B84_008549	0.709298	1	0.166667
GO:0035023	regulation of Rho protein signal transduction	BP	1	6	1021	5489	gene-G4B84_008570	0.709298	1	0.166667
GO:0036388	pre-replicative complex assembly	BP	1	6	1021	5489	gene-G4B84_009282	0.709298	1	0.166667
GO:0043094	cellular metabolic compound salvage	BP	1	6	1021	5489	gene-G4B84_001354	0.709298	1	0.166667
GO:0044070	regulation of anion transport	BP	1	6	1021	5489	gene-G4B84_011836	0.709298	1	0.166667
GO:0045943	positive regulation of transcription by RNA polymerase I	BP	1	6	1021	5489	gene-G4B84_000720	0.709298	1	0.166667
GO:0051156	glucose 6-phosphate metabolic process	BP	1	6	1021	5489	gene-G4B84_005333	0.709298	1	0.166667
GO:0070189	kynurenine metabolic process	BP	1	6	1021	5489	gene-G4B84_007820	0.709298	1	0.166667
GO:0071941	nitrogen cycle metabolic process	BP	1	6	1021	5489	gene-G4B84_000755	0.709298	1	0.166667
GO:0071966	fungal-type cell wall polysaccharide metabolic process	BP	1	6	1021	5489	gene-G4B84_009950	0.709298	1	0.166667
GO:0072350	tricarboxylic acid metabolic process	BP	1	6	1021	5489	gene-G4B84_003150	0.709298	1	0.166667
GO:0090307	mitotic spindle assembly	BP	1	6	1021	5489	gene-G4B84_008549	0.709298	1	0.166667
GO:0097576	vacuole fusion	BP	1	6	1021	5489	gene-G4B84_008098	0.709298	1	0.166667
GO:0140029	exocytic process	BP	1	6	1021	5489	gene-G4B84_005602	0.709298	1	0.166667
GO:1901068	guanosine-containing compound metabolic process	BP	1	6	1021	5489	gene-G4B84_004088	0.709298	1	0.166667
GO:1902299	pre-replicative complex assembly involved in cell cycle DNA replication	BP	1	6	1021	5489	gene-G4B84_009282	0.709298	1	0.166667
GO:1902903	regulation of supramolecular fiber organization	BP	1	6	1021	5489	gene-G4B84_008549	0.709298	1	0.166667
GO:1902969	mitotic DNA replication	BP	1	6	1021	5489	gene-G4B84_000390	0.709298	1	0.166667
GO:1903959	regulation of anion transmembrane transport	BP	1	6	1021	5489	gene-G4B84_011836	0.709298	1	0.166667
GO:0000049	tRNA binding	MF	1	6	1021	5489	gene-G4B84_006074	0.709298	1	0.166667
GO:0019900	kinase binding	MF	1	6	1021	5489	gene-G4B84_003867	0.709298	1	0.166667
GO:0019904	protein domain specific binding	MF	1	6	1021	5489	gene-G4B84_009885	0.709298	1	0.166667
GO:0022839	ion gated channel activity	MF	1	6	1021	5489	gene-G4B84_011836	0.709298	1	0.166667
GO:0036442	proton-exporting ATPase activity	MF	1	6	1021	5489	gene-G4B84_009231	0.709298	1	0.166667
GO:0042277	peptide binding	MF	1	6	1021	5489	gene-G4B84_008060	0.709298	1	0.166667
GO:0005779	integral component of peroxisomal membrane	CC	1	6	1021	5489	gene-G4B84_002946	0.709298	1	0.166667
GO:0009277	fungal-type cell wall	CC	1	6	1021	5489	gene-G4B84_009069	0.709298	1	0.166667
GO:0030133	transport vesicle	CC	1	6	1021	5489	gene-G4B84_000859	0.709298	1	0.166667
GO:0030660	Golgi-associated vesicle membrane	CC	1	6	1021	5489	gene-G4B84_000859	0.709298	1	0.166667
GO:0030662	coated vesicle membrane	CC	1	6	1021	5489	gene-G4B84_000859	0.709298	1	0.166667
GO:0031226	intrinsic component of plasma membrane	CC	1	6	1021	5489	gene-G4B84_000670	0.709298	1	0.166667
GO:0031231	intrinsic component of peroxisomal membrane	CC	1	6	1021	5489	gene-G4B84_002946	0.709298	1	0.166667
GO:0045259	proton-transporting ATP synthase complex	CC	1	6	1021	5489	gene-G4B84_004714	0.709298	1	0.166667
GO:1902562	H4 histone acetyltransferase complex	CC	1	6	1021	5489	gene-G4B84_004903	0.709298	1	0.166667
GO:0007264	small GTPase mediated signal transduction	BP	5	31	1021	5489	gene-G4B84_008570,gene-G4B84_003460,gene-G4B84_004446,gene-G4B84_007101,gene-G4B84_012171	0.709461	1	0.16129
GO:0015077	monovalent inorganic cation transmembrane transporter activity	MF	5	31	1021	5489	gene-G4B84_000411,gene-G4B84_009231,gene-G4B84_004714,gene-G4B84_000045,gene-G4B84_004878	0.709461	1	0.16129
GO:0044445	cytosolic part	CC	5	31	1021	5489	gene-G4B84_002853,gene-G4B84_010956,gene-G4B84_012150,gene-G4B84_008178,gene-G4B84_000617	0.709461	1	0.16129
GO:0043543	protein acylation	BP	4	25	1021	5489	gene-G4B84_003362,gene-G4B84_004919,gene-G4B84_005224,gene-G4B84_003698	0.71022	1	0.16
GO:0099080	supramolecular complex	CC	4	25	1021	5489	gene-G4B84_008663,gene-G4B84_000241,gene-G4B84_007689,gene-G4B84_008549	0.71022	1	0.16
GO:0099081	supramolecular polymer	CC	4	25	1021	5489	gene-G4B84_008663,gene-G4B84_000241,gene-G4B84_007689,gene-G4B84_008549	0.71022	1	0.16
GO:0099512	supramolecular fiber	CC	4	25	1021	5489	gene-G4B84_008663,gene-G4B84_000241,gene-G4B84_007689,gene-G4B84_008549	0.71022	1	0.16
GO:0006457	protein folding	BP	6	37	1021	5489	gene-G4B84_000271,gene-G4B84_002475,gene-G4B84_006800,gene-G4B84_009950,gene-G4B84_010705,gene-G4B84_010686	0.710551	1	0.162162
GO:0006475	internal protein amino acid acetylation	BP	3	19	1021	5489	gene-G4B84_003362,gene-G4B84_004919,gene-G4B84_005224	0.714544	1	0.157895
GO:0006643	membrane lipid metabolic process	BP	3	19	1021	5489	gene-G4B84_001176,gene-G4B84_004996,gene-G4B84_001007	0.714544	1	0.157895
GO:0009066	aspartate family amino acid metabolic process	BP	3	19	1021	5489	gene-G4B84_008470,gene-G4B84_006864,gene-G4B84_008026	0.714544	1	0.157895
GO:0016573	histone acetylation	BP	3	19	1021	5489	gene-G4B84_003362,gene-G4B84_004919,gene-G4B84_005224	0.714544	1	0.157895
GO:0018393	internal peptidyl-lysine acetylation	BP	3	19	1021	5489	gene-G4B84_003362,gene-G4B84_004919,gene-G4B84_005224	0.714544	1	0.157895
GO:0018394	peptidyl-lysine acetylation	BP	3	19	1021	5489	gene-G4B84_003362,gene-G4B84_004919,gene-G4B84_005224	0.714544	1	0.157895
GO:0015631	tubulin binding	MF	3	19	1021	5489	gene-G4B84_007689,gene-G4B84_008549,gene-G4B84_008706	0.714544	1	0.157895
GO:0044270	cellular nitrogen compound catabolic process	BP	9	55	1021	5489	gene-G4B84_001976,gene-G4B84_002054,gene-G4B84_005333,gene-G4B84_006112,gene-G4B84_002853,gene-G4B84_004428,gene-G4B84_010182,gene-G4B84_007820,gene-G4B84_000755	0.718583	1	0.163636
GO:0034220	ion transmembrane transport	BP	15	90	1021	5489	gene-G4B84_006917,gene-G4B84_010294,gene-G4B84_007857,gene-G4B84_000349,gene-G4B84_000045,gene-G4B84_009231,gene-G4B84_004714,gene-G4B84_008497,gene-G4B84_001739,gene-G4B84_002027,gene-G4B84_003919,gene-G4B84_003478,gene-G4B84_004710,gene-G4B84_004878,gene-G4B84_011836	0.72377	1	0.166667
GO:0000166	nucleotide binding	MF	122	684	1021	5489	gene-G4B84_008178,gene-G4B84_000240,gene-G4B84_000722,gene-G4B84_001106,gene-G4B84_001169,gene-G4B84_001921,gene-G4B84_001922,gene-G4B84_001976,gene-G4B84_002054,gene-G4B84_003015,gene-G4B84_003392,gene-G4B84_003679,gene-G4B84_004710,gene-G4B84_005268,gene-G4B84_005285,gene-G4B84_005298,gene-G4B84_005596,gene-G4B84_006112,gene-G4B84_006229,gene-G4B84_006515,gene-G4B84_006800,gene-G4B84_007493,gen…	0.724559	1	0.178363
GO:1901265	nucleoside phosphate binding	MF	122	684	1021	5489	gene-G4B84_000566,gene-G4B84_000923,gene-G4B84_002356,gene-G4B84_003613,gene-G4B84_005511,gene-G4B84_007007,gene-G4B84_009788,gene-G4B84_011099,gene-G4B84_007023,gene-G4B84_008178,gene-G4B84_000240,gene-G4B84_000722,gene-G4B84_001106,gene-G4B84_001169,gene-G4B84_001921,gene-G4B84_001922,gene-G4B84_001976,gene-G4B84_002054,gene-G4B84_003015,gene-G4B84_003392,gene-G4B84_003679,gene-G4B84_004710,gen…	0.724559	1	0.178363
GO:0006348	chromatin silencing at telomere	BP	2	13	1021	5489	gene-G4B84_007007,gene-G4B84_008596	0.72686	1	0.153846
GO:0006446	regulation of translational initiation	BP	2	13	1021	5489	gene-G4B84_010956,gene-G4B84_003393	0.72686	1	0.153846
GO:0006568	tryptophan metabolic process	BP	2	13	1021	5489	gene-G4B84_007820,gene-G4B84_003881	0.72686	1	0.153846
GO:0006586	indolalkylamine metabolic process	BP	2	13	1021	5489	gene-G4B84_003881,gene-G4B84_007820	0.72686	1	0.153846
GO:0009112	nucleobase metabolic process	BP	2	13	1021	5489	gene-G4B84_003391,gene-G4B84_004428	0.72686	1	0.153846
GO:0018208	peptidyl-proline modification	BP	2	13	1021	5489	gene-G4B84_002475,gene-G4B84_010686	0.72686	1	0.153846
GO:0032392	DNA geometric change	BP	2	13	1021	5489	gene-G4B84_000722,gene-G4B84_007635	0.72686	1	0.153846
GO:0032508	DNA duplex unwinding	BP	2	13	1021	5489	gene-G4B84_000722,gene-G4B84_007635	0.72686	1	0.153846
GO:0042430	indole-containing compound metabolic process	BP	2	13	1021	5489	gene-G4B84_003881,gene-G4B84_007820	0.72686	1	0.153846
GO:0003678	DNA helicase activity	MF	2	13	1021	5489	gene-G4B84_000722,gene-G4B84_007635	0.72686	1	0.153846
GO:0008234	cysteine-type peptidase activity	MF	2	13	1021	5489	gene-G4B84_012104,gene-G4B84_003971	0.72686	1	0.153846
GO:1901681	sulfur compound binding	MF	2	13	1021	5489	gene-G4B84_002403,gene-G4B84_008060	0.72686	1	0.153846
GO:0044438	microbody part	CC	2	13	1021	5489	gene-G4B84_003271,gene-G4B84_002946	0.72686	1	0.153846
GO:0044439	peroxisomal part	CC	2	13	1021	5489	gene-G4B84_003271,gene-G4B84_002946	0.72686	1	0.153846
GO:0016301	kinase activity	MF	26	153	1021	5489	gene-G4B84_009385,gene-G4B84_010091,gene-G4B84_010350,gene-G4B84_002588,gene-G4B84_001976,gene-G4B84_002054,gene-G4B84_006112,gene-G4B84_000240,gene-G4B84_005285,gene-G4B84_007493,gene-G4B84_008393,gene-G4B84_008418,gene-G4B84_010987,gene-G4B84_011489,gene-G4B84_001922,gene-G4B84_005268,gene-G4B84_005596,gene-G4B84_008574,gene-G4B84_005298,gene-G4B84_001354,gene-G4B84_003679,gene-G4B84_003786,gen…	0.729243	1	0.169935
GO:0036094	small molecule binding	MF	141	789	1021	5489	gene-G4B84_000566,gene-G4B84_000923,gene-G4B84_002356,gene-G4B84_003613,gene-G4B84_005511,gene-G4B84_007007,gene-G4B84_009788,gene-G4B84_011099,gene-G4B84_007023,gene-G4B84_008178,gene-G4B84_000240,gene-G4B84_000722,gene-G4B84_001106,gene-G4B84_001169,gene-G4B84_001921,gene-G4B84_001922,gene-G4B84_001976,gene-G4B84_002054,gene-G4B84_003015,gene-G4B84_003392,gene-G4B84_003679,gene-G4B84_004710,gen…	0.730528	1	0.178707
GO:0008237	metallopeptidase activity	MF	6	38	1021	5489	gene-G4B84_002378,gene-G4B84_002603,gene-G4B84_001210,gene-G4B84_001712,gene-G4B84_003664,gene-G4B84_004753	0.735523	1	0.157895
GO:0007154	cell communication	BP	14	85	1021	5489	gene-G4B84_009385,gene-G4B84_010091,gene-G4B84_010350,gene-G4B84_000755,gene-G4B84_006370,gene-G4B84_005511,gene-G4B84_003460,gene-G4B84_004446,gene-G4B84_007101,gene-G4B84_012171,gene-G4B84_008257,gene-G4B84_000730,gene-G4B84_008570,gene-G4B84_002552	0.73631	1	0.164706
GO:0006865	amino acid transport	BP	5	32	1021	5489	gene-G4B84_006917,gene-G4B84_010294,gene-G4B84_007857,gene-G4B84_007738,gene-G4B84_007756	0.73657	1	0.15625
GO:0000287	magnesium ion binding	MF	5	32	1021	5489	gene-G4B84_002403,gene-G4B84_008060,gene-G4B84_008247,gene-G4B84_008397,gene-G4B84_002853	0.73657	1	0.15625
GO:0048285	organelle fission	BP	8	50	1021	5489	gene-G4B84_000625,gene-G4B84_002946,gene-G4B84_002552,gene-G4B84_008549,gene-G4B84_005298,gene-G4B84_000345,gene-G4B84_000730,gene-G4B84_008596	0.737203	1	0.16
GO:0046700	heterocycle catabolic process	BP	9	56	1021	5489	gene-G4B84_001976,gene-G4B84_002054,gene-G4B84_005333,gene-G4B84_006112,gene-G4B84_002853,gene-G4B84_004428,gene-G4B84_010182,gene-G4B84_008363,gene-G4B84_007820	0.739089	1	0.160714
GO:1903046	meiotic cell cycle process	BP	4	26	1021	5489	gene-G4B84_005298,gene-G4B84_000345,gene-G4B84_000730,gene-G4B84_008596	0.74002	1	0.153846
GO:0031177	phosphopantetheine binding	MF	4	26	1021	5489	gene-G4B84_004659,gene-G4B84_006937,gene-G4B84_007517,gene-G4B84_009652	0.74002	1	0.153846
GO:0042578	phosphoric ester hydrolase activity	MF	10	62	1021	5489	gene-G4B84_010418,gene-G4B84_008458,gene-G4B84_006370,gene-G4B84_005081,gene-G4B84_000359,gene-G4B84_004996,gene-G4B84_003517,gene-G4B84_005238,gene-G4B84_005021,gene-G4B84_008283	0.741373	1	0.16129
GO:0006367	transcription initiation from RNA polymerase II promoter	BP	3	20	1021	5489	gene-G4B84_000755,gene-G4B84_005224,gene-G4B84_006230	0.747862	1	0.15
GO:0055082	cellular chemical homeostasis	BP	3	20	1021	5489	gene-G4B84_001976,gene-G4B84_002054,gene-G4B84_006112	0.747862	1	0.15
GO:0006790	sulfur compound metabolic process	BP	8	51	1021	5489	gene-G4B84_001523,gene-G4B84_008768,gene-G4B84_006864,gene-G4B84_001001,gene-G4B84_008060,gene-G4B84_008026,gene-G4B84_000617,gene-G4B84_010044	0.757791	1	0.156863
GO:0098655	cation transmembrane transport	BP	8	51	1021	5489	gene-G4B84_000045,gene-G4B84_009231,gene-G4B84_004714,gene-G4B84_008497,gene-G4B84_002027,gene-G4B84_003919,gene-G4B84_003478,gene-G4B84_004710	0.757791	1	0.156863
GO:0034248	regulation of cellular amide metabolic process	BP	5	33	1021	5489	gene-G4B84_003393,gene-G4B84_008107,gene-G4B84_010044,gene-G4B84_010956,gene-G4B84_000755	0.761782	1	0.151515
GO:0065004	protein-DNA complex assembly	BP	5	33	1021	5489	gene-G4B84_003362,gene-G4B84_009282,gene-G4B84_000755,gene-G4B84_005224,gene-G4B84_006230	0.761782	1	0.151515
GO:0046873	metal ion transmembrane transporter activity	MF	5	33	1021	5489	gene-G4B84_008497,gene-G4B84_002027,gene-G4B84_003919,gene-G4B84_004878,gene-G4B84_006425	0.761782	1	0.151515
GO:0001522	pseudouridine synthesis	BP	1	7	1021	5489	gene-G4B84_006312	0.76343	1	0.142857
GO:0006275	regulation of DNA replication	BP	1	7	1021	5489	gene-G4B84_009282	0.76343	1	0.142857
GO:0006415	translational termination	BP	1	7	1021	5489	gene-G4B84_008107	0.76343	1	0.142857
GO:0006487	protein N-linked glycosylation	BP	1	7	1021	5489	gene-G4B84_001968	0.76343	1	0.142857
GO:0006569	tryptophan catabolic process	BP	1	7	1021	5489	gene-G4B84_007820	0.76343	1	0.142857
GO:0007052	mitotic spindle organization	BP	1	7	1021	5489	gene-G4B84_008549	0.76343	1	0.142857
GO:0007266	Rho protein signal transduction	BP	1	7	1021	5489	gene-G4B84_008570	0.76343	1	0.142857
GO:0008154	actin polymerization or depolymerization	BP	1	7	1021	5489	gene-G4B84_008315	0.76343	1	0.142857
GO:0015914	phospholipid transport	BP	1	7	1021	5489	gene-G4B84_008397	0.76343	1	0.142857
GO:0015988	energy coupled proton transmembrane transport, against electrochemical gradient	BP	1	7	1021	5489	gene-G4B84_004714	0.76343	1	0.142857
GO:0015991	ATP hydrolysis coupled proton transport	BP	1	7	1021	5489	gene-G4B84_004714	0.76343	1	0.142857
GO:0034762	regulation of transmembrane transport	BP	1	7	1021	5489	gene-G4B84_011836	0.76343	1	0.142857
GO:0034765	regulation of ion transmembrane transport	BP	1	7	1021	5489	gene-G4B84_011836	0.76343	1	0.142857
GO:0042402	cellular biogenic amine catabolic process	BP	1	7	1021	5489	gene-G4B84_007820	0.76343	1	0.142857
GO:0042436	indole-containing compound catabolic process	BP	1	7	1021	5489	gene-G4B84_007820	0.76343	1	0.142857
GO:0043269	regulation of ion transport	BP	1	7	1021	5489	gene-G4B84_011836	0.76343	1	0.142857
GO:0044773	mitotic DNA damage checkpoint	BP	1	7	1021	5489	gene-G4B84_008596	0.76343	1	0.142857
GO:0045324	late endosome to vacuole transport	BP	1	7	1021	5489	gene-G4B84_006293	0.76343	1	0.142857
GO:0046218	indolalkylamine catabolic process	BP	1	7	1021	5489	gene-G4B84_007820	0.76343	1	0.142857
GO:0048584	positive regulation of response to stimulus	BP	1	7	1021	5489	gene-G4B84_000730	0.76343	1	0.142857
GO:0051235	maintenance of location	BP	1	7	1021	5489	gene-G4B84_000309	0.76343	1	0.142857
GO:0061982	meiosis I cell cycle process	BP	1	7	1021	5489	gene-G4B84_005298	0.76343	1	0.142857
GO:0071214	cellular response to abiotic stimulus	BP	1	7	1021	5489	gene-G4B84_000722	0.76343	1	0.142857
GO:0090151	establishment of protein localization to mitochondrial membrane	BP	1	7	1021	5489	gene-G4B84_000954	0.76343	1	0.142857
GO:0090329	regulation of DNA-dependent DNA replication	BP	1	7	1021	5489	gene-G4B84_009282	0.76343	1	0.142857
GO:0090662	ATP hydrolysis coupled transmembrane transport	BP	1	7	1021	5489	gene-G4B84_004714	0.76343	1	0.142857
GO:0099131	ATP hydrolysis coupled ion transmembrane transport	BP	1	7	1021	5489	gene-G4B84_004714	0.76343	1	0.142857
GO:0099132	ATP hydrolysis coupled cation transmembrane transport	BP	1	7	1021	5489	gene-G4B84_004714	0.76343	1	0.142857
GO:0104004	cellular response to environmental stimulus	BP	1	7	1021	5489	gene-G4B84_000722	0.76343	1	0.142857
GO:1901659	glycosyl compound biosynthetic process	BP	1	7	1021	5489	gene-G4B84_008555	0.76343	1	0.142857
GO:0003995	acyl-CoA dehydrogenase activity	MF	1	7	1021	5489	gene-G4B84_012279	0.76343	1	0.142857
GO:0005096	GTPase activator activity	MF	1	7	1021	5489	gene-G4B84_010956	0.76343	1	0.142857
GO:0015298	solute:cation antiporter activity	MF	1	7	1021	5489	gene-G4B84_000045	0.76343	1	0.142857
GO:0015299	solute:proton antiporter activity	MF	1	7	1021	5489	gene-G4B84_000045	0.76343	1	0.142857
GO:0015925	galactosidase activity	MF	1	7	1021	5489	gene-G4B84_002842	0.76343	1	0.142857
GO:0016628	oxidoreductase activity, acting on the CH-CH group of donors, NAD or NADP as acceptor	MF	1	7	1021	5489	gene-G4B84_012150	0.76343	1	0.142857
GO:0016712	oxidoreductase activity, acting on paired donors, with incorporation or reduction of molecular oxygen, reduced flavin or flavoprotein as one donor, and incorporation of one atom of oxygen	MF	1	7	1021	5489	gene-G4B84_010887	0.76343	1	0.142857
GO:0017048	Rho GTPase binding	MF	1	7	1021	5489	gene-G4B84_008570	0.76343	1	0.142857
GO:0022836	gated channel activity	MF	1	7	1021	5489	gene-G4B84_011836	0.76343	1	0.142857
GO:0051920	peroxiredoxin activity	MF	1	7	1021	5489	gene-G4B84_003656	0.76343	1	0.142857
GO:0060590	ATPase regulator activity	MF	1	7	1021	5489	gene-G4B84_008178	0.76343	1	0.142857
GO:0012506	vesicle membrane	CC	1	7	1021	5489	gene-G4B84_000859	0.76343	1	0.142857
GO:0030659	cytoplasmic vesicle membrane	CC	1	7	1021	5489	gene-G4B84_000859	0.76343	1	0.142857
GO:0031011	Ino80 complex	CC	1	7	1021	5489	gene-G4B84_009612	0.76343	1	0.142857
GO:0031314	extrinsic component of mitochondrial inner membrane	CC	1	7	1021	5489	gene-G4B84_010670	0.76343	1	0.142857
GO:0033202	DNA helicase complex	CC	1	7	1021	5489	gene-G4B84_009612	0.76343	1	0.142857
GO:0046695	SLIK (SAGA-like) complex	CC	1	7	1021	5489	gene-G4B84_005224	0.76343	1	0.142857
GO:0006022	aminoglycan metabolic process	BP	2	14	1021	5489	gene-G4B84_010458,gene-G4B84_009950	0.76495	1	0.142857
GO:0007093	mitotic cell cycle checkpoint	BP	2	14	1021	5489	gene-G4B84_000625,gene-G4B84_008596	0.76495	1	0.142857
GO:0045333	cellular respiration	BP	2	14	1021	5489	gene-G4B84_003150,gene-G4B84_000228	0.76495	1	0.142857
GO:0046467	membrane lipid biosynthetic process	BP	2	14	1021	5489	gene-G4B84_001176,gene-G4B84_001007	0.76495	1	0.142857
GO:0048284	organelle fusion	BP	2	14	1021	5489	gene-G4B84_003015,gene-G4B84_008098	0.76495	1	0.142857
GO:0070838	divalent metal ion transport	BP	2	14	1021	5489	gene-G4B84_002027,gene-G4B84_003919	0.76495	1	0.142857
GO:0072511	divalent inorganic cation transport	BP	2	14	1021	5489	gene-G4B84_002027,gene-G4B84_003919	0.76495	1	0.142857
GO:0004180	carboxypeptidase activity	MF	2	14	1021	5489	gene-G4B84_004533,gene-G4B84_006021	0.76495	1	0.142857
GO:0004222	metalloendopeptidase activity	MF	2	14	1021	5489	gene-G4B84_002378,gene-G4B84_002603	0.76495	1	0.142857
GO:0008170	N-methyltransferase activity	MF	2	14	1021	5489	gene-G4B84_009862,gene-G4B84_008596	0.76495	1	0.142857
GO:0016567	protein ubiquitination	BP	4	27	1021	5489	gene-G4B84_002926,gene-G4B84_004923,gene-G4B84_008107,gene-G4B84_005331	0.767435	1	0.148148
GO:0048583	regulation of response to stimulus	BP	4	27	1021	5489	gene-G4B84_005298,gene-G4B84_000730,gene-G4B84_008570,gene-G4B84_000625	0.767435	1	0.148148
GO:0016627	oxidoreductase activity, acting on the CH-CH group of donors	MF	4	27	1021	5489	gene-G4B84_012279,gene-G4B84_006760,gene-G4B84_012150,gene-G4B84_001621	0.767435	1	0.148148
GO:0006520	cellular amino acid metabolic process	BP	25	151	1021	5489	gene-G4B84_003207,gene-G4B84_011868,gene-G4B84_006229,gene-G4B84_003402,gene-G4B84_008470,gene-G4B84_008052,gene-G4B84_006752,gene-G4B84_010963,gene-G4B84_009832,gene-G4B84_010587,gene-G4B84_006864,gene-G4B84_008363,gene-G4B84_003881,gene-G4B84_002972,gene-G4B84_002974,gene-G4B84_002976,gene-G4B84_006020,gene-G4B84_004781,gene-G4B84_008026,gene-G4B84_004842,gene-G4B84_007820,gene-G4B84_002774,gen…	0.773913	1	0.165563
GO:0016311	dephosphorylation	BP	8	52	1021	5489	gene-G4B84_004475,gene-G4B84_000359,gene-G4B84_005081,gene-G4B84_007087,gene-G4B84_005021,gene-G4B84_008283,gene-G4B84_010418,gene-G4B84_008458	0.777209	1	0.153846
GO:0006812	cation transport	BP	11	70	1021	5489	gene-G4B84_006425,gene-G4B84_000045,gene-G4B84_009231,gene-G4B84_004714,gene-G4B84_008497,gene-G4B84_002027,gene-G4B84_003919,gene-G4B84_003478,gene-G4B84_004710,gene-G4B84_000189,gene-G4B84_007079	0.778305	1	0.157143
GO:0098662	inorganic cation transmembrane transport	BP	6	40	1021	5489	gene-G4B84_000045,gene-G4B84_009231,gene-G4B84_004714,gene-G4B84_008497,gene-G4B84_002027,gene-G4B84_003919	0.780767	1	0.15
GO:0018205	peptidyl-lysine modification	BP	5	34	1021	5489	gene-G4B84_003362,gene-G4B84_004919,gene-G4B84_005224,gene-G4B84_008596,gene-G4B84_009862	0.78513	1	0.147059
GO:0061024	membrane organization	BP	5	34	1021	5489	gene-G4B84_002602,gene-G4B84_006697,gene-G4B84_000954,gene-G4B84_003392,gene-G4B84_008397	0.78513	1	0.147059
GO:0008757	S-adenosylmethionine-dependent methyltransferase activity	MF	5	34	1021	5489	gene-G4B84_006699,gene-G4B84_009065,gene-G4B84_009862,gene-G4B84_008596,gene-G4B84_008555	0.78513	1	0.147059
GO:0033218	amide binding	MF	5	34	1021	5489	gene-G4B84_004659,gene-G4B84_006937,gene-G4B84_007517,gene-G4B84_009652,gene-G4B84_008060	0.78513	1	0.147059
GO:0007346	regulation of mitotic cell cycle	BP	4	28	1021	5489	gene-G4B84_000625,gene-G4B84_002552,gene-G4B84_008596,gene-G4B84_008549	0.792534	1	0.142857
GO:0009116	nucleoside metabolic process	BP	4	28	1021	5489	gene-G4B84_004088,gene-G4B84_003116,gene-G4B84_004032,gene-G4B84_010169	0.792534	1	0.142857
GO:0051321	meiotic cell cycle	BP	4	28	1021	5489	gene-G4B84_005298,gene-G4B84_000345,gene-G4B84_000730,gene-G4B84_008596	0.792534	1	0.142857
GO:0007165	signal transduction	BP	12	77	1021	5489	gene-G4B84_009385,gene-G4B84_010091,gene-G4B84_010350,gene-G4B84_006370,gene-G4B84_005511,gene-G4B84_003460,gene-G4B84_004446,gene-G4B84_007101,gene-G4B84_012171,gene-G4B84_008257,gene-G4B84_000730,gene-G4B84_008570	0.794829	1	0.155844
GO:0023052	signaling	BP	12	77	1021	5489	gene-G4B84_009385,gene-G4B84_010091,gene-G4B84_010350,gene-G4B84_006370,gene-G4B84_005511,gene-G4B84_003460,gene-G4B84_004446,gene-G4B84_007101,gene-G4B84_012171,gene-G4B84_008257,gene-G4B84_000730,gene-G4B84_008570	0.794829	1	0.155844
GO:0051179	localization	BP	124	707	1021	5489	gene-G4B84_000617,gene-G4B84_008549,gene-G4B84_006917,gene-G4B84_010294,gene-G4B84_007857,gene-G4B84_000859,gene-G4B84_004705,gene-G4B84_008098,gene-G4B84_003015,gene-G4B84_000931,gene-G4B84_003392,gene-G4B84_004423,gene-G4B84_004762,gene-G4B84_005337,gene-G4B84_005742,gene-G4B84_005775,gene-G4B84_006003,gene-G4B84_007488,gene-G4B84_009882,gene-G4B84_009986,gene-G4B84_010565,gene-G4B84_012045,gen…	0.795801	1	0.175389
GO:0000280	nuclear division	BP	7	47	1021	5489	gene-G4B84_000625,gene-G4B84_002552,gene-G4B84_008549,gene-G4B84_005298,gene-G4B84_000345,gene-G4B84_000730,gene-G4B84_008596	0.797566	1	0.148936
GO:0006661	phosphatidylinositol biosynthetic process	BP	2	15	1021	5489	gene-G4B84_001176,gene-G4B84_005081	0.798335	1	0.133333
GO:0006914	autophagy	BP	2	15	1021	5489	gene-G4B84_003178,gene-G4B84_006711	0.798335	1	0.133333
GO:0032879	regulation of localization	BP	2	15	1021	5489	gene-G4B84_011836,gene-G4B84_000625	0.798335	1	0.133333
GO:0000139	Golgi membrane	CC	2	15	1021	5489	gene-G4B84_001007,gene-G4B84_000411	0.798335	1	0.133333
GO:0016592	mediator complex	CC	2	15	1021	5489	gene-G4B84_004465,gene-G4B84_004815	0.798335	1	0.133333
GO:0044433	cytoplasmic vesicle part	CC	2	15	1021	5489	gene-G4B84_000859,gene-G4B84_003206	0.798335	1	0.133333
GO:0034655	nucleobase-containing compound catabolic process	BP	6	41	1021	5489	gene-G4B84_001976,gene-G4B84_002054,gene-G4B84_005333,gene-G4B84_006112,gene-G4B84_002853,gene-G4B84_010182	0.801081	1	0.146341
GO:0006352	DNA-templated transcription, initiation	BP	3	22	1021	5489	gene-G4B84_000755,gene-G4B84_005224,gene-G4B84_006230	0.80509	1	0.136364
GO:0005874	microtubule	CC	3	22	1021	5489	gene-G4B84_008549,gene-G4B84_000241,gene-G4B84_007689	0.80509	1	0.136364
GO:0006650	glycerophospholipid metabolic process	BP	5	35	1021	5489	gene-G4B84_001176,gene-G4B84_005081,gene-G4B84_011046,gene-G4B84_011159,gene-G4B84_007087	0.806663	1	0.142857
GO:0019725	cellular homeostasis	BP	5	35	1021	5489	gene-G4B84_001976,gene-G4B84_002054,gene-G4B84_006112,gene-G4B84_000407,gene-G4B84_009144	0.806663	1	0.142857
GO:0002098	tRNA wobble uridine modification	BP	1	8	1021	5489	gene-G4B84_000617	0.80749	1	0.125
GO:0006525	arginine metabolic process	BP	1	8	1021	5489	gene-G4B84_003402	0.80749	1	0.125
GO:0009070	serine family amino acid biosynthetic process	BP	1	8	1021	5489	gene-G4B84_010963	0.80749	1	0.125
GO:0009074	aromatic amino acid family catabolic process	BP	1	8	1021	5489	gene-G4B84_007820	0.80749	1	0.125
GO:0009310	amine catabolic process	BP	1	8	1021	5489	gene-G4B84_007820	0.80749	1	0.125
GO:0016558	protein import into peroxisome matrix	BP	1	8	1021	5489	gene-G4B84_003271	0.80749	1	0.125
GO:0031497	chromatin assembly	BP	1	8	1021	5489	gene-G4B84_003362	0.80749	1	0.125
GO:0033692	cellular polysaccharide biosynthetic process	BP	1	8	1021	5489	gene-G4B84_009950	0.80749	1	0.125
GO:0048278	vesicle docking	BP	1	8	1021	5489	gene-G4B84_005602	0.80749	1	0.125
GO:0051225	spindle assembly	BP	1	8	1021	5489	gene-G4B84_008549	0.80749	1	0.125
GO:0003712	transcription coregulator activity	MF	1	8	1021	5489	gene-G4B84_000755	0.80749	1	0.125
GO:0005200	structural constituent of cytoskeleton	MF	1	8	1021	5489	gene-G4B84_000241	0.80749	1	0.125
GO:0008194	UDP-glycosyltransferase activity	MF	1	8	1021	5489	gene-G4B84_001176	0.80749	1	0.125
GO:0008374	O-acyltransferase activity	MF	1	8	1021	5489	gene-G4B84_008026	0.80749	1	0.125
GO:0008408	3'-5' exonuclease activity	MF	1	8	1021	5489	gene-G4B84_001948	0.80749	1	0.125
GO:0016877	ligase activity, forming carbon-sulfur bonds	MF	1	8	1021	5489	gene-G4B84_000670	0.80749	1	0.125
GO:0042803	protein homodimerization activity	MF	1	8	1021	5489	gene-G4B84_008060	0.80749	1	0.125
GO:0000124	SAGA complex	CC	1	8	1021	5489	gene-G4B84_005224	0.80749	1	0.125
GO:0005618	cell wall	CC	1	8	1021	5489	gene-G4B84_009069	0.80749	1	0.125
GO:0009295	nucleoid	CC	1	8	1021	5489	gene-G4B84_003150	0.80749	1	0.125
GO:0030312	external encapsulating structure	CC	1	8	1021	5489	gene-G4B84_009069	0.80749	1	0.125
GO:0033177	proton-transporting two-sector ATPase complex, proton-transporting domain	CC	1	8	1021	5489	gene-G4B84_004714	0.80749	1	0.125
GO:0042645	mitochondrial nucleoid	CC	1	8	1021	5489	gene-G4B84_003150	0.80749	1	0.125
GO:0070461	SAGA-type complex	CC	1	8	1021	5489	gene-G4B84_005224	0.80749	1	0.125
GO:0008144	drug binding	MF	62	365	1021	5489	gene-G4B84_000240,gene-G4B84_000722,gene-G4B84_001106,gene-G4B84_001169,gene-G4B84_001921,gene-G4B84_001922,gene-G4B84_001976,gene-G4B84_002054,gene-G4B84_003015,gene-G4B84_003392,gene-G4B84_003679,gene-G4B84_004710,gene-G4B84_005268,gene-G4B84_005285,gene-G4B84_005298,gene-G4B84_005596,gene-G4B84_006112,gene-G4B84_006229,gene-G4B84_006515,gene-G4B84_006800,gene-G4B84_007493,gene-G4B84_007651,gen…	0.812602	1	0.169863
GO:0006366	transcription by RNA polymerase II	BP	36	218	1021	5489	gene-G4B84_004465,gene-G4B84_000755,gene-G4B84_000966,gene-G4B84_001167,gene-G4B84_001598,gene-G4B84_001735,gene-G4B84_001743,gene-G4B84_002267,gene-G4B84_002627,gene-G4B84_003362,gene-G4B84_003654,gene-G4B84_004427,gene-G4B84_004626,gene-G4B84_004815,gene-G4B84_004955,gene-G4B84_005753,gene-G4B84_005804,gene-G4B84_005816,gene-G4B84_006027,gene-G4B84_006544,gene-G4B84_008471,gene-G4B84_008780,gen…	0.814276	1	0.165138
GO:0008236	serine-type peptidase activity	MF	4	29	1021	5489	gene-G4B84_004533,gene-G4B84_005591,gene-G4B84_008766,gene-G4B84_011722	0.81541	1	0.137931
GO:0017171	serine hydrolase activity	MF	4	29	1021	5489	gene-G4B84_004533,gene-G4B84_005591,gene-G4B84_008766,gene-G4B84_011722	0.81541	1	0.137931
GO:0097367	carbohydrate derivative binding	MF	71	416	1021	5489	gene-G4B84_000240,gene-G4B84_000722,gene-G4B84_001106,gene-G4B84_001169,gene-G4B84_001921,gene-G4B84_001922,gene-G4B84_001976,gene-G4B84_002054,gene-G4B84_003015,gene-G4B84_003392,gene-G4B84_003679,gene-G4B84_004710,gene-G4B84_005268,gene-G4B84_005285,gene-G4B84_005298,gene-G4B84_005596,gene-G4B84_006112,gene-G4B84_006229,gene-G4B84_006515,gene-G4B84_006800,gene-G4B84_007493,gene-G4B84_007651,gen…	0.815825	1	0.170673
GO:0009057	macromolecule catabolic process	BP	25	155	1021	5489	gene-G4B84_002181,gene-G4B84_002842,gene-G4B84_004023,gene-G4B84_007948,gene-G4B84_010353,gene-G4B84_011915,gene-G4B84_012266,gene-G4B84_010182,gene-G4B84_004923,gene-G4B84_012104,gene-G4B84_001573,gene-G4B84_002619,gene-G4B84_007503,gene-G4B84_008019,gene-G4B84_012262,gene-G4B84_003015,gene-G4B84_003673,gene-G4B84_011150,gene-G4B84_004353,gene-G4B84_004551,gene-G4B84_009644,gene-G4B84_002656,gen…	0.816884	1	0.16129
GO:0008150	biological_process	BP	679	3714	1021	5489	gene-G4B84_000954,gene-G4B84_003150,gene-G4B84_006312,gene-G4B84_009282,gene-G4B84_000670,gene-G4B84_000617,gene-G4B84_010954,gene-G4B84_007181,gene-G4B84_007007,gene-G4B84_000241,gene-G4B84_011149,gene-G4B84_003207,gene-G4B84_004465,gene-G4B84_008549,gene-G4B84_009385,gene-G4B84_010091,gene-G4B84_010350,gene-G4B84_002181,gene-G4B84_002842,gene-G4B84_004023,gene-G4B84_007948,gene-G4B84_010353,gen…	0.819951	1	0.182822
GO:0002183	cytoplasmic translational initiation	BP	2	16	1021	5489	gene-G4B84_003393,gene-G4B84_010956	0.827446	1	0.125
GO:0007031	peroxisome organization	BP	2	16	1021	5489	gene-G4B84_002946,gene-G4B84_003271	0.827446	1	0.125
GO:0008299	isoprenoid biosynthetic process	BP	2	16	1021	5489	gene-G4B84_002365,gene-G4B84_011931	0.827446	1	0.125
GO:0009073	aromatic amino acid family biosynthetic process	BP	2	16	1021	5489	gene-G4B84_003207,gene-G4B84_004781	0.827446	1	0.125
GO:0042255	ribosome assembly	BP	2	16	1021	5489	gene-G4B84_009282,gene-G4B84_010956	0.827446	1	0.125
GO:0044764	multi-organism cellular process	BP	2	16	1021	5489	gene-G4B84_003015,gene-G4B84_012276	0.827446	1	0.125
GO:0045454	cell redox homeostasis	BP	2	16	1021	5489	gene-G4B84_000407,gene-G4B84_009144	0.827446	1	0.125
GO:0045930	negative regulation of mitotic cell cycle	BP	2	16	1021	5489	gene-G4B84_000625,gene-G4B84_008596	0.827446	1	0.125
GO:0032592	integral component of mitochondrial membrane	CC	2	16	1021	5489	gene-G4B84_002602,gene-G4B84_006697	0.827446	1	0.125
GO:0022411	cellular component disassembly	BP	3	23	1021	5489	gene-G4B84_008315,gene-G4B84_008107,gene-G4B84_008549	0.82935	1	0.130435
GO:0004842	ubiquitin-protein transferase activity	MF	3	23	1021	5489	gene-G4B84_004923,gene-G4B84_008107,gene-G4B84_005331	0.82935	1	0.130435
GO:0019787	ubiquitin-like protein transferase activity	MF	3	23	1021	5489	gene-G4B84_008107,gene-G4B84_005331,gene-G4B84_004923	0.82935	1	0.130435
GO:0033043	regulation of organelle organization	BP	7	49	1021	5489	gene-G4B84_000625,gene-G4B84_002552,gene-G4B84_008549,gene-G4B84_008098,gene-G4B84_000345,gene-G4B84_000730,gene-G4B84_008596	0.832174	1	0.142857
GO:0032553	ribonucleotide binding	MF	69	408	1021	5489	gene-G4B84_000240,gene-G4B84_000722,gene-G4B84_001106,gene-G4B84_001169,gene-G4B84_001921,gene-G4B84_001922,gene-G4B84_001976,gene-G4B84_002054,gene-G4B84_003015,gene-G4B84_003392,gene-G4B84_003679,gene-G4B84_004710,gene-G4B84_005268,gene-G4B84_005285,gene-G4B84_005298,gene-G4B84_005596,gene-G4B84_006112,gene-G4B84_006229,gene-G4B84_006515,gene-G4B84_006800,gene-G4B84_007493,gene-G4B84_007651,gen…	0.835738	1	0.169118
GO:0006464	cellular protein modification process	BP	42	255	1021	5489	gene-G4B84_002475,gene-G4B84_010686,gene-G4B84_004923,gene-G4B84_008107,gene-G4B84_005331,gene-G4B84_000240,gene-G4B84_001922,gene-G4B84_005268,gene-G4B84_005285,gene-G4B84_005596,gene-G4B84_007493,gene-G4B84_008393,gene-G4B84_008418,gene-G4B84_008574,gene-G4B84_010987,gene-G4B84_011489,gene-G4B84_004475,gene-G4B84_001801,gene-G4B84_001858,gene-G4B84_003206,gene-G4B84_003409,gene-G4B84_003745,gen…	0.835785	1	0.164706
GO:0036211	protein modification process	BP	42	255	1021	5489	gene-G4B84_002475,gene-G4B84_010686,gene-G4B84_004923,gene-G4B84_008107,gene-G4B84_005331,gene-G4B84_000240,gene-G4B84_001922,gene-G4B84_005268,gene-G4B84_005285,gene-G4B84_005596,gene-G4B84_007493,gene-G4B84_008393,gene-G4B84_008418,gene-G4B84_008574,gene-G4B84_010987,gene-G4B84_011489,gene-G4B84_004475,gene-G4B84_001801,gene-G4B84_001858,gene-G4B84_003206,gene-G4B84_003409,gene-G4B84_003745,gen…	0.835785	1	0.164706
GO:0043161	proteasome-mediated ubiquitin-dependent protein catabolic process	BP	4	30	1021	5489	gene-G4B84_003015,gene-G4B84_003673,gene-G4B84_008178,gene-G4B84_011150	0.836173	1	0.133333
GO:0005342	organic acid transmembrane transporter activity	MF	4	30	1021	5489	gene-G4B84_006917,gene-G4B84_010294,gene-G4B84_007857,gene-G4B84_001739	0.836173	1	0.133333
GO:0008514	organic anion transmembrane transporter activity	MF	4	30	1021	5489	gene-G4B84_006917,gene-G4B84_010294,gene-G4B84_007857,gene-G4B84_001739	0.836173	1	0.133333
GO:0046943	carboxylic acid transmembrane transporter activity	MF	4	30	1021	5489	gene-G4B84_006917,gene-G4B84_010294,gene-G4B84_007857,gene-G4B84_001739	0.836173	1	0.133333
GO:0044451	nucleoplasm part	CC	11	74	1021	5489	gene-G4B84_004919,gene-G4B84_009282,gene-G4B84_005224,gene-G4B84_006230,gene-G4B84_004465,gene-G4B84_004815,gene-G4B84_000390,gene-G4B84_000345,gene-G4B84_000730,gene-G4B84_004903,gene-G4B84_007007	0.836936	1	0.148649
GO:0001934	positive regulation of protein phosphorylation	BP	1	9	1021	5489	gene-G4B84_000730	0.843351	1	0.111111
GO:0002097	tRNA wobble base modification	BP	1	9	1021	5489	gene-G4B84_000617	0.843351	1	0.111111
GO:0006356	regulation of transcription by RNA polymerase I	BP	1	9	1021	5489	gene-G4B84_000720	0.843351	1	0.111111
GO:0006406	mRNA export from nucleus	BP	1	9	1021	5489	gene-G4B84_000625	0.843351	1	0.111111
GO:0006778	porphyrin-containing compound metabolic process	BP	1	9	1021	5489	gene-G4B84_006760	0.843351	1	0.111111
GO:0006779	porphyrin-containing compound biosynthetic process	BP	1	9	1021	5489	gene-G4B84_006760	0.843351	1	0.111111
GO:0006887	exocytosis	BP	1	9	1021	5489	gene-G4B84_005602	0.843351	1	0.111111
GO:0015748	organophosphate ester transport	BP	1	9	1021	5489	gene-G4B84_008397	0.843351	1	0.111111
GO:0015919	peroxisomal membrane transport	BP	1	9	1021	5489	gene-G4B84_003271	0.843351	1	0.111111
GO:0016226	iron-sulfur cluster assembly	BP	1	9	1021	5489	gene-G4B84_000617	0.843351	1	0.111111
GO:0031163	metallo-sulfur cluster assembly	BP	1	9	1021	5489	gene-G4B84_000617	0.843351	1	0.111111
GO:0031329	regulation of cellular catabolic process	BP	1	9	1021	5489	gene-G4B84_000755	0.843351	1	0.111111
GO:0042327	positive regulation of phosphorylation	BP	1	9	1021	5489	gene-G4B84_000730	0.843351	1	0.111111
GO:0043650	dicarboxylic acid biosynthetic process	BP	1	9	1021	5489	gene-G4B84_006752	0.843351	1	0.111111
GO:0044774	mitotic DNA integrity checkpoint	BP	1	9	1021	5489	gene-G4B84_008596	0.843351	1	0.111111
GO:0071427	mRNA-containing ribonucleoprotein complex export from nucleus	BP	1	9	1021	5489	gene-G4B84_000625	0.843351	1	0.111111
GO:1902850	microtubule cytoskeleton organization involved in mitosis	BP	1	9	1021	5489	gene-G4B84_008549	0.843351	1	0.111111
GO:0008175	tRNA methyltransferase activity	MF	1	9	1021	5489	gene-G4B84_009065	0.843351	1	0.111111
GO:0015297	antiporter activity	MF	1	9	1021	5489	gene-G4B84_000045	0.843351	1	0.111111
GO:0030976	thiamine pyrophosphate binding	MF	1	9	1021	5489	gene-G4B84_002403	0.843351	1	0.111111
GO:0032947	protein-containing complex scaffold activity	MF	1	9	1021	5489	gene-G4B84_005224	0.843351	1	0.111111
GO:0010494	cytoplasmic stress granule	CC	1	9	1021	5489	gene-G4B84_003613	0.843351	1	0.111111
GO:0030117	membrane coat	CC	1	9	1021	5489	gene-G4B84_000859	0.843351	1	0.111111
GO:0034708	methyltransferase complex	CC	1	9	1021	5489	gene-G4B84_009065	0.843351	1	0.111111
GO:0048475	coated membrane	CC	1	9	1021	5489	gene-G4B84_000859	0.843351	1	0.111111
GO:0072686	mitotic spindle	CC	1	9	1021	5489	gene-G4B84_000722	0.843351	1	0.111111
GO:0097346	INO80-type complex	CC	1	9	1021	5489	gene-G4B84_009612	0.843351	1	0.111111
GO:0046486	glycerolipid metabolic process	BP	5	37	1021	5489	gene-G4B84_001176,gene-G4B84_005081,gene-G4B84_011046,gene-G4B84_011159,gene-G4B84_007087	0.844553	1	0.135135
GO:0070647	protein modification by small protein conjugation or removal	BP	5	37	1021	5489	gene-G4B84_004923,gene-G4B84_008107,gene-G4B84_005331,gene-G4B84_003971,gene-G4B84_002926	0.844553	1	0.135135
GO:0008233	peptidase activity	MF	21	135	1021	5489	gene-G4B84_002196,gene-G4B84_004753,gene-G4B84_006021,gene-G4B84_004533,gene-G4B84_000135,gene-G4B84_008330,gene-G4B84_012200,gene-G4B84_012104,gene-G4B84_003971,gene-G4B84_002378,gene-G4B84_002603,gene-G4B84_001210,gene-G4B84_001712,gene-G4B84_003664,gene-G4B84_005591,gene-G4B84_008766,gene-G4B84_011722,gene-G4B84_004434,gene-G4B84_011648,gene-G4B84_011890,gene-G4B84_000953	0.849676	1	0.155556
GO:0006342	chromatin silencing	BP	3	24	1021	5489	gene-G4B84_007007,gene-G4B84_008596,gene-G4B84_003362	0.850971	1	0.125
GO:0040029	regulation of gene expression, epigenetic	BP	3	24	1021	5489	gene-G4B84_003362,gene-G4B84_007007,gene-G4B84_008596	0.850971	1	0.125
GO:0045814	negative regulation of gene expression, epigenetic	BP	3	24	1021	5489	gene-G4B84_003362,gene-G4B84_007007,gene-G4B84_008596	0.850971	1	0.125
GO:0099513	polymeric cytoskeletal fiber	CC	3	24	1021	5489	gene-G4B84_000241,gene-G4B84_007689,gene-G4B84_008549	0.850971	1	0.125
GO:0000096	sulfur amino acid metabolic process	BP	2	17	1021	5489	gene-G4B84_006864,gene-G4B84_008026	0.852716	1	0.117647
GO:0006479	protein methylation	BP	2	17	1021	5489	gene-G4B84_008596,gene-G4B84_009862	0.852716	1	0.117647
GO:0006576	cellular biogenic amine metabolic process	BP	2	17	1021	5489	gene-G4B84_003881,gene-G4B84_007820	0.852716	1	0.117647
GO:0006720	isoprenoid metabolic process	BP	2	17	1021	5489	gene-G4B84_011931,gene-G4B84_002365	0.852716	1	0.117647
GO:0008213	protein alkylation	BP	2	17	1021	5489	gene-G4B84_008596,gene-G4B84_009862	0.852716	1	0.117647
GO:0061919	process utilizing autophagic mechanism	BP	2	17	1021	5489	gene-G4B84_003178,gene-G4B84_006711	0.852716	1	0.117647
GO:0004177	aminopeptidase activity	MF	2	17	1021	5489	gene-G4B84_002196,gene-G4B84_004753	0.852716	1	0.117647
GO:0005507	copper ion binding	MF	2	17	1021	5489	gene-G4B84_002199,gene-G4B84_007356	0.852716	1	0.117647
GO:0098573	intrinsic component of mitochondrial membrane	CC	2	17	1021	5489	gene-G4B84_002602,gene-G4B84_006697	0.852716	1	0.117647
GO:0098800	inner mitochondrial membrane protein complex	CC	2	17	1021	5489	gene-G4B84_002602,gene-G4B84_006697	0.852716	1	0.117647
GO:0018193	peptidyl-amino acid modification	BP	9	63	1021	5489	gene-G4B84_002475,gene-G4B84_010686,gene-G4B84_003362,gene-G4B84_004919,gene-G4B84_005224,gene-G4B84_008596,gene-G4B84_009862,gene-G4B84_005298,gene-G4B84_003698	0.853945	1	0.142857
GO:1903825	organic acid transmembrane transport	BP	4	31	1021	5489	gene-G4B84_006917,gene-G4B84_010294,gene-G4B84_007857,gene-G4B84_001739	0.854945	1	0.129032
GO:1905039	carboxylic acid transmembrane transport	BP	4	31	1021	5489	gene-G4B84_006917,gene-G4B84_010294,gene-G4B84_007857,gene-G4B84_001739	0.854945	1	0.129032
GO:0031301	integral component of organelle membrane	CC	4	31	1021	5489	gene-G4B84_002946,gene-G4B84_004878,gene-G4B84_002602,gene-G4B84_006697	0.854945	1	0.129032
GO:0044432	endoplasmic reticulum part	CC	8	57	1021	5489	gene-G4B84_000309,gene-G4B84_000954,gene-G4B84_004652,gene-G4B84_009950,gene-G4B84_011050,gene-G4B84_011632,gene-G4B84_003015,gene-G4B84_001968	0.857367	1	0.140351
GO:0045892	negative regulation of transcription, DNA-templated	BP	5	38	1021	5489	gene-G4B84_004465,gene-G4B84_003362,gene-G4B84_007007,gene-G4B84_008596,gene-G4B84_000137	0.861073	1	0.131579
GO:1902679	negative regulation of RNA biosynthetic process	BP	5	38	1021	5489	gene-G4B84_004465,gene-G4B84_003362,gene-G4B84_007007,gene-G4B84_008596,gene-G4B84_000137	0.861073	1	0.131579
GO:1903507	negative regulation of nucleic acid-templated transcription	BP	5	38	1021	5489	gene-G4B84_004465,gene-G4B84_003362,gene-G4B84_007007,gene-G4B84_008596,gene-G4B84_000137	0.861073	1	0.131579
GO:0042592	homeostatic process	BP	7	51	1021	5489	gene-G4B84_007635,gene-G4B84_001976,gene-G4B84_002054,gene-G4B84_006112,gene-G4B84_000407,gene-G4B84_009144,gene-G4B84_004878	0.861928	1	0.137255
GO:0005783	endoplasmic reticulum	CC	16	107	1021	5489	gene-G4B84_001968,gene-G4B84_000309,gene-G4B84_000954,gene-G4B84_004652,gene-G4B84_009950,gene-G4B84_011050,gene-G4B84_011632,gene-G4B84_003015,gene-G4B84_000271,gene-G4B84_000349,gene-G4B84_000670,gene-G4B84_001176,gene-G4B84_003392,gene-G4B84_006699,gene-G4B84_009882,gene-G4B84_012105	0.866918	1	0.149533
GO:0010558	negative regulation of macromolecule biosynthetic process	BP	6	45	1021	5489	gene-G4B84_004465,gene-G4B84_003362,gene-G4B84_007007,gene-G4B84_008596,gene-G4B84_000137,gene-G4B84_010956	0.867993	1	0.133333
GO:2000113	negative regulation of cellular macromolecule biosynthetic process	BP	6	45	1021	5489	gene-G4B84_004465,gene-G4B84_003362,gene-G4B84_007007,gene-G4B84_008596,gene-G4B84_000137,gene-G4B84_010956	0.867993	1	0.133333
GO:0032446	protein modification by small protein conjugation	BP	4	32	1021	5489	gene-G4B84_004923,gene-G4B84_008107,gene-G4B84_005331,gene-G4B84_002926	0.871856	1	0.125
GO:0004812	aminoacyl-tRNA ligase activity	MF	4	32	1021	5489	gene-G4B84_011868,gene-G4B84_006229,gene-G4B84_006074,gene-G4B84_008662	0.871856	1	0.125
GO:0016875	ligase activity, forming carbon-oxygen bonds	MF	4	32	1021	5489	gene-G4B84_006074,gene-G4B84_008662,gene-G4B84_011868,gene-G4B84_006229	0.871856	1	0.125
GO:0000027	ribosomal large subunit assembly	BP	1	10	1021	5489	gene-G4B84_009282	0.872537	1	0.1
GO:0006333	chromatin assembly or disassembly	BP	1	10	1021	5489	gene-G4B84_003362	0.872537	1	0.1
GO:0006505	GPI anchor metabolic process	BP	1	10	1021	5489	gene-G4B84_001176	0.872537	1	0.1
GO:0006506	GPI anchor biosynthetic process	BP	1	10	1021	5489	gene-G4B84_001176	0.872537	1	0.1
GO:0006560	proline metabolic process	BP	1	10	1021	5489	gene-G4B84_008363	0.872537	1	0.1
GO:0006625	protein targeting to peroxisome	BP	1	10	1021	5489	gene-G4B84_003271	0.872537	1	0.1
GO:0007033	vacuole organization	BP	1	10	1021	5489	gene-G4B84_008098	0.872537	1	0.1
GO:0007051	spindle organization	BP	1	10	1021	5489	gene-G4B84_008549	0.872537	1	0.1
GO:0009272	fungal-type cell wall biogenesis	BP	1	10	1021	5489	gene-G4B84_009950	0.872537	1	0.1
GO:0010256	endomembrane system organization	BP	1	10	1021	5489	gene-G4B84_003392	0.872537	1	0.1
GO:0010562	positive regulation of phosphorus metabolic process	BP	1	10	1021	5489	gene-G4B84_000730	0.872537	1	0.1
GO:0022406	membrane docking	BP	1	10	1021	5489	gene-G4B84_005602	0.872537	1	0.1
GO:0032940	secretion by cell	BP	1	10	1021	5489	gene-G4B84_005602	0.872537	1	0.1
GO:0042278	purine nucleoside metabolic process	BP	1	10	1021	5489	gene-G4B84_004088	0.872537	1	0.1
GO:0043574	peroxisomal transport	BP	1	10	1021	5489	gene-G4B84_003271	0.872537	1	0.1
GO:0045937	positive regulation of phosphate metabolic process	BP	1	10	1021	5489	gene-G4B84_000730	0.872537	1	0.1
GO:0046128	purine ribonucleoside metabolic process	BP	1	10	1021	5489	gene-G4B84_004088	0.872537	1	0.1
GO:0046903	secretion	BP	1	10	1021	5489	gene-G4B84_005602	0.872537	1	0.1
GO:0051028	mRNA transport	BP	1	10	1021	5489	gene-G4B84_000625	0.872537	1	0.1
GO:0072662	protein localization to peroxisome	BP	1	10	1021	5489	gene-G4B84_003271	0.872537	1	0.1
GO:0072663	establishment of protein localization to peroxisome	BP	1	10	1021	5489	gene-G4B84_003271	0.872537	1	0.1
GO:0140056	organelle localization by membrane tethering	BP	1	10	1021	5489	gene-G4B84_005602	0.872537	1	0.1
GO:0003697	single-stranded DNA binding	MF	1	10	1021	5489	gene-G4B84_003150	0.872537	1	0.1
GO:0008134	transcription factor binding	MF	1	10	1021	5489	gene-G4B84_000755	0.872537	1	0.1
GO:0009055	electron transfer activity	MF	1	10	1021	5489	gene-G4B84_000407	0.872537	1	0.1
GO:0015079	potassium ion transmembrane transporter activity	MF	1	10	1021	5489	gene-G4B84_004878	0.872537	1	0.1
GO:0016891	endoribonuclease activity, producing 5'-phosphomonoesters	MF	1	10	1021	5489	gene-G4B84_006771	0.872537	1	0.1
GO:0005798	Golgi-associated vesicle	CC	1	10	1021	5489	gene-G4B84_000859	0.872537	1	0.1
GO:0005852	eukaryotic translation initiation factor 3 complex	CC	1	10	1021	5489	gene-G4B84_003393	0.872537	1	0.1
GO:0031312	extrinsic component of organelle membrane	CC	1	10	1021	5489	gene-G4B84_010670	0.872537	1	0.1
GO:0009067	aspartate family amino acid biosynthetic process	BP	2	18	1021	5489	gene-G4B84_008470,gene-G4B84_008026	0.874566	1	0.111111
GO:1902531	regulation of intracellular signal transduction	BP	2	18	1021	5489	gene-G4B84_000730,gene-G4B84_008570	0.874566	1	0.111111
GO:0005741	mitochondrial outer membrane	CC	2	18	1021	5489	gene-G4B84_000954,gene-G4B84_006699	0.874566	1	0.111111
GO:0031968	organelle outer membrane	CC	2	18	1021	5489	gene-G4B84_006699,gene-G4B84_000954	0.874566	1	0.111111
GO:0098791	Golgi subcompartment	CC	2	18	1021	5489	gene-G4B84_000411,gene-G4B84_001007	0.874566	1	0.111111
GO:0140096	catalytic activity, acting on a protein	MF	46	284	1021	5489	gene-G4B84_009385,gene-G4B84_010091,gene-G4B84_010350,gene-G4B84_002475,gene-G4B84_010686,gene-G4B84_002196,gene-G4B84_004753,gene-G4B84_006021,gene-G4B84_004533,gene-G4B84_000135,gene-G4B84_008330,gene-G4B84_012200,gene-G4B84_012104,gene-G4B84_003971,gene-G4B84_002378,gene-G4B84_002603,gene-G4B84_001210,gene-G4B84_001712,gene-G4B84_003664,gene-G4B84_005591,gene-G4B84_008766,gene-G4B84_011722,gen…	0.87548	1	0.161972
GO:0016874	ligase activity	MF	18	120	1021	5489	gene-G4B84_010954,gene-G4B84_008470,gene-G4B84_007651,gene-G4B84_008060,gene-G4B84_000670,gene-G4B84_005171,gene-G4B84_006074,gene-G4B84_008662,gene-G4B84_011868,gene-G4B84_006229,gene-G4B84_003202,gene-G4B84_003221,gene-G4B84_010591,gene-G4B84_008205,gene-G4B84_009661,gene-G4B84_003218,gene-G4B84_008661,gene-G4B84_007652	0.875481	1	0.15
[truncated: 504 more rows]

## Sheet: Sheet1e
Supplementary file 1e. KEGG pathways enriched of the DEGs in transcriptome data
[truncated: 257 more rows]

[truncated: 10 more sheets: Sheetf, Sheet1g, Sheet1h, Sheet1i, Sheet1j, Sheet1k, Sheet 1l, Sheet 1m, Sheet 1n , Sheet1o]
